# Supplementary material for: Supramolecular interactions between ethylene-bridged oligoureas: nanorings and chains formed by cooperative positive allostery
Source: Royal Society of Chemistry journal article supplement (doi:10.1039/d2sc04716k), 2022-01-01
Supplement: d2sc04716k1.pdf [file d2sc04716k1.pdf]

## Supramolecular interactions between ethylene-bridged oligoureas: nanorings and chains by cooperative positive allostery

David P. Tilly,<sup>\*a,b</sup> Matej Žabka,<sup>a</sup> Inigo Vitorica-Yrezabal,<sup>b</sup> Hazel A. Sparkes,<sup>a</sup> Natalie Pridmore<sup>a</sup> and Jonathan Clayden<sup>\*a</sup>

<sup>a</sup> School of Chemistry, University of Bristol, Cantock's Close, Bristol BS8 1TS, UK

<sup>b</sup> Department of Chemistry, University of Manchester, Oxford Road, Manchester, M13 9PL UK

### Supporting Information

#### Contents

|                                                                                 |     |
|---------------------------------------------------------------------------------|-----|
| 1. General Information .....                                                    | 2   |
| 2. General synthetic schemes.....                                               | 3   |
| 3. Procedures and Characterisation of compounds .....                           | 5   |
| 4. <sup>1</sup> H and <sup>13</sup> C NMR spectra of synthesised compounds..... | 29  |
| 5. Crystal data and structure refinement.....                                   | 76  |
| 6. NMR studies .....                                                            | 104 |
| 7. Computational studies .....                                                  | 126 |

## 1. General Information

All reactions were performed under a nitrogen atmosphere. All reagents and chemicals were obtained from chemical suppliers and used without further purification. Anhydrous solvents were dispensed under nitrogen from a solvent purification system (Innovative Technologies PureSolve PS-MP-5) or were purchased from commercial suppliers.

Thin-layer chromatography (TLC) was performed using pre-coated plates (Macherey-Nagel Polygram SIL G/UV254). Visualisation was achieved by way of UV light (at 254 nm), staining with either potassium permanganate, phosphomolybdic acid (in ethanol), or ninhydrin (in ethanol). Stained TLC plates were heated for visualization. Flash column chromatography was carried out either manually using Fluorochem 60 silica (40-60  $\mu\text{m}$  particle size) or using an automated Biotage<sup>®</sup> Isolera Spektra Four with gradient elution on pre-packed silica gel Biotage<sup>®</sup> SNAP Ultra columns or ZIP Sphere columns. Nuclear Magnetic Resonance spectra (<sup>1</sup>H NMR and <sup>13</sup>C NMR) were recorded on Bruker Nano 400, Jeol ECS 400 or Bruker Avance III HD 500 Cryo with 5 mm DCH <sup>13</sup>C-<sup>1</sup>H/D Cryo Probe (500 MHz) spectrometers. All NMR characterisation experiments were performed at 25 °C. The spectra were plotted in Mestrenova 14.2.1 or TopSpin 4.1.4. Chemical shifts ( $\delta$ ) are quoted in parts per million (ppm) relative to the specified deuterated solvent. Spectra were calibrated using the residual solvent peaks for CDCl<sub>3</sub> ( $\delta$ H: 7.26 ppm;  $\delta$ C: 77.16 ppm), CD<sub>2</sub>Cl<sub>2</sub> ( $\delta$ H: 5.32 ppm;  $\delta$ C: 53.84 ppm) and (CD<sub>3</sub>)<sub>2</sub>SO ( $\delta$ H: 2.50 ppm;  $\delta$ C: 39.52 ppm) as appropriate. Coupling constants (*J*) are quoted in Hz and are rounded to the nearest 0.1 Hz. Splitting patterns are abbreviated to singlet (s), doublet (d), triplet (t), quartet (q), multiplet (m) or some combination thereof.

Infrared spectra were recorded on a Perkin Elmer Spectrum Two FT-IR spectrometer with samples applied as neat films. Absorptions maxima ( $\nu_{\text{max}}$ ) of interest are quoted in wavenumbers as  $\nu$  in cm<sup>-1</sup> for the most intense bands.

High resolution spectrometry experiments (HR-MS) were recorded by staff at the University of Bristol on a Synapt G2S Waters for nanospray experiments, MicroTOFII Bruker Daltonics and Orbitrap Elite Thermo Scientific for electrospray ionisation experiments.

Melting points were measured on a Stuart SMP10 melting point apparatus and are uncorrected.

## 2. General synthetic schemes

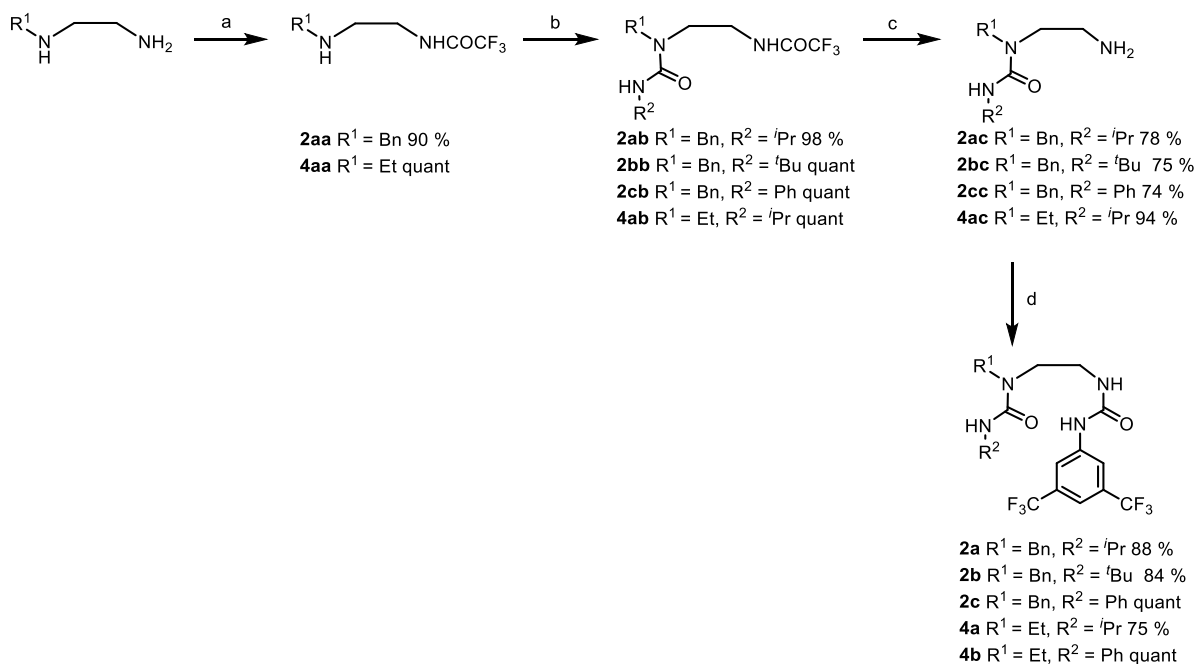

**Scheme SI1.** Synthesis of diureas **2a-c**, **4a-b**. Reagents and conditions: (a) CF<sub>3</sub>CO<sub>2</sub>Et (1 equiv.), MeOH, -78 °C to RT, 12h; (b) R<sup>2</sup>NCO (1.2 equiv.), 1,2-DCE, 50 °C, 12 h; (c) NaOH aq. 0.2 M (1 equiv.), MeOH, 40 °C, 12 h.; (d) 3,5-(CF<sub>3</sub>)<sub>2</sub>PhNCO (1.1 equiv.), CH<sub>2</sub>Cl<sub>2</sub>, RT, 16 h.

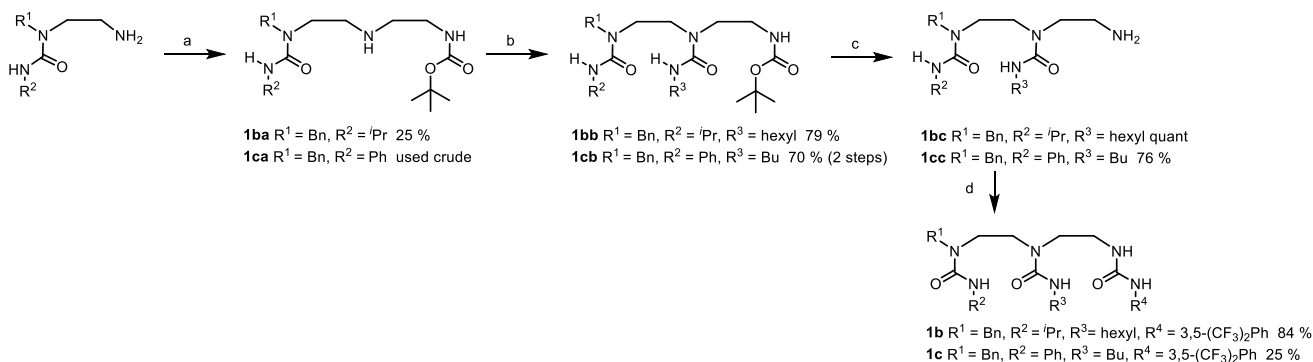

**Scheme SI2.** Synthesis of triureas **1b**, **1c**. Reagents and conditions: (a) *N*-Boc-2-aminoacetaldehyde (1.5 equiv.), MeOH, RT, 12 h. then NaBH<sub>4</sub> (3 equiv.), RT, 5 h.; (b) R<sup>3</sup>NCO (1.5 equiv.), CH<sub>2</sub>Cl<sub>2</sub>, RT, 12 h.; (c) CF<sub>3</sub>CO<sub>2</sub>H (18 equiv.), CH<sub>2</sub>Cl<sub>2</sub>, RT, 12 h.; (d) R<sup>4</sup>NCO (1.1 equiv.), CH<sub>2</sub>Cl<sub>2</sub>, RT, 16 h.

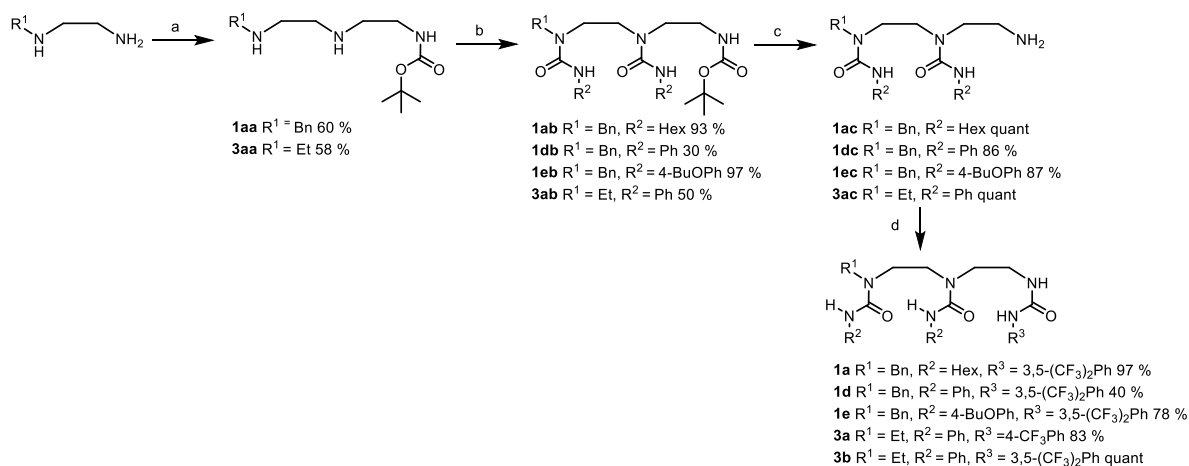

**Scheme SI3.** Synthesis of triureas **1a**, **1d**, **1e**, **3a-b**. Reagents and conditions: (a) *N*-Boc-2-aminoacetaldehyde (0.67 equiv.), MeOH, RT, 12 h. then NaBH<sub>4</sub> (1.35 equiv.), RT, 5 h.; (b) RNCO (3 equiv.), CH<sub>2</sub>Cl<sub>2</sub>, RT, 12 h.; (c) CF<sub>3</sub>CO<sub>2</sub>H (18 equiv.), CH<sub>2</sub>Cl<sub>2</sub>, RT, 12 h.; (d) R<sup>3</sup>NCO (1.1 equiv.), CH<sub>2</sub>Cl<sub>2</sub>, RT, 16 h.

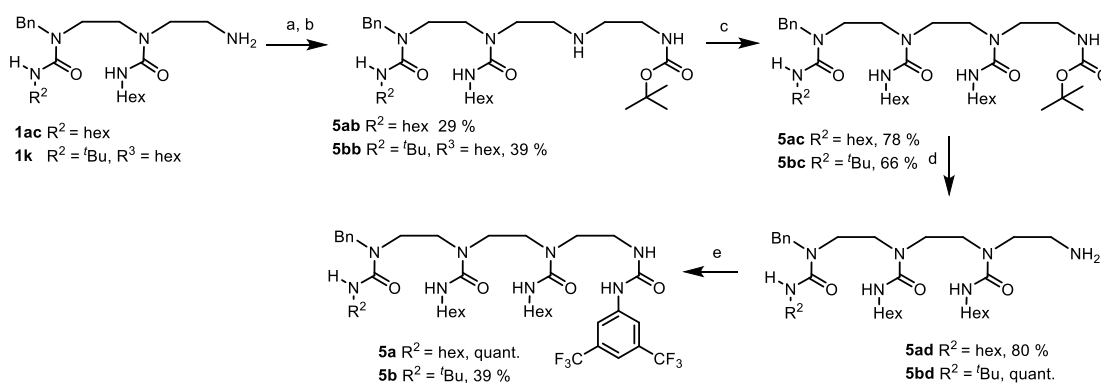

**Scheme SI4.** Synthesis of tetraureas **5a**, **5b**. Reagents and conditions: (a) *N*-Boc-2-aminoacetaldehyde (1.5 equiv.), MeOH, RT, 12 h.; (b) NaBH<sub>4</sub> (3 equiv.), RT, 5 h.; (c) HexylNCO (1.5 equiv.), CH<sub>2</sub>Cl<sub>2</sub>, RT, 12 h.; (d) CF<sub>3</sub>CO<sub>2</sub>H (18 equiv.), CH<sub>2</sub>Cl<sub>2</sub>, RT, 12 h.; (e) (CF<sub>3</sub>)<sub>2</sub>PhNCO (1.2 equiv.), CH<sub>2</sub>Cl<sub>2</sub>, RT, 4 h.

### 3. Procedures and characterisation of compounds

#### 3.1. General experimental Procedures

##### General procedure A for installing a carbamoyl substituent on the *N*-trifluoroacetyl-*N'*-*R*<sup>1</sup>ethylenediamine

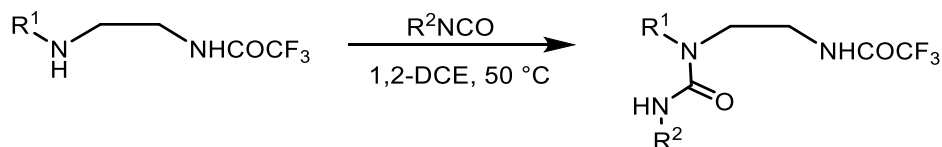

To a 0.1 M solution of *N*-trifluoroacetyl-*N'*-alkylethylenediamine in anhydrous 1,2-dichloroethane was added the isocyanate (1.2 equiv.), the solution was stirred at 50 °C for 12 hours. The mixture was washed at 20 °C with water (20 mL), the organic layer was dried over Na<sub>2</sub>SO<sub>4</sub>, filtered, concentrated under reduced pressure. Flash chromatography of the residue on silica gel (eluent CH<sub>2</sub>Cl<sub>2</sub>:MeOH 95:5) provided the *N*-trifluoroacetyl-*N'*-(alkylcarbamoyl)-*N'*-alkylethylenediamine.

##### General procedure B for the deprotection of trifluoroacetamide from *N*-trifluoroacetyl-*N'*-(alkylcarbamoyl)-*N'*-alkylethylenediamines

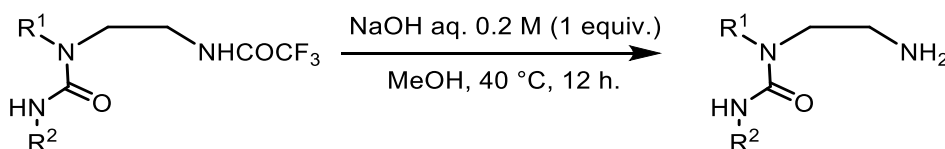

To a 0.07 M solution of *N*-trifluoroacetyl-*N'*-(alkyl/arylcarbamoyl)-*N'*-*R*<sup>1</sup>ethylenediamine in MeOH was added a 0.2M aqueous solution of NaOH (1 equiv. per trifluoroacetamide) and the mixture was stirred for 12 hours at 40 °C. The mixture was concentrated under reduced pressure to remove MeOH, the aqueous phase was extracted with CH<sub>2</sub>Cl<sub>2</sub>. The organic layer was dried over Na<sub>2</sub>SO<sub>4</sub>, filtered and concentrated under reduced pressure. Products tend to degrade on silica, no chromatography purification is preferred for that step.

##### General procedure C for the reductive amination with *N*-Boc-2-aminoacetaldehyde

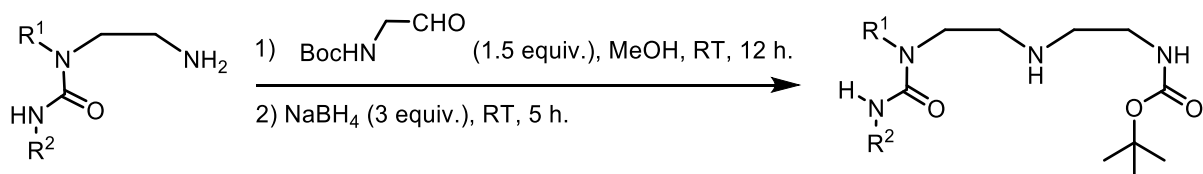

A 0.1 M solution of alkylamine in anhydrous MeOH and *N*-Boc-2-aminoacetaldehyde (1.5 equiv.) was stirred at 20 °C for 12 hours. Sodium borohydride NaBH<sub>4</sub> (3 equiv.) was then added portionwise (1 equiv. every 30 minutes) at 0 °C, the resulting mixture was stirred for 5 hours at 20 °C. Water (20 mL) was added, the mixture was stirred for 30 minutes at 20 °C, then was concentrated under reduced pressure to remove MeOH. Brine was added, the aqueous phase was extracted with CHCl<sub>3</sub> : *i*PrOH 2:1 mixture. The organic layer was dried over Na<sub>2</sub>SO<sub>4</sub>, filtered and concentrated under reduced pressure. Flash chromatography of the residue on silica gel gave the (*tert*butoxycarbonyl)alkylamine product. Some products tend to degrade on silica, no chromatography purification is preferred for that step.

#### General procedure D for installing carbamoyl substituents

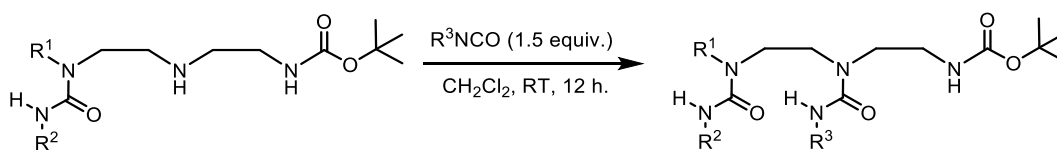

To a 0.1M solution of secondary amine in CH<sub>2</sub>Cl<sub>2</sub> was added the desired alkyl/arylisocyanate (1.5 equiv. per NH group to substitute) and the mixture was stirred at 20 °C for 12 hours. Water was added, the resulting mixture was extracted using CH<sub>2</sub>Cl<sub>2</sub>. The organic layer was dried over Na<sub>2</sub>SO<sub>4</sub>, filtered and concentrated under reduced pressure. The crude product was purified by silica gel flash chromatography (CH<sub>2</sub>Cl<sub>2</sub>:MeOH 95:5) to afford the desired diurea compound.

#### General procedure E for the deprotection of *N*-Boc using trifluoroacetic acid

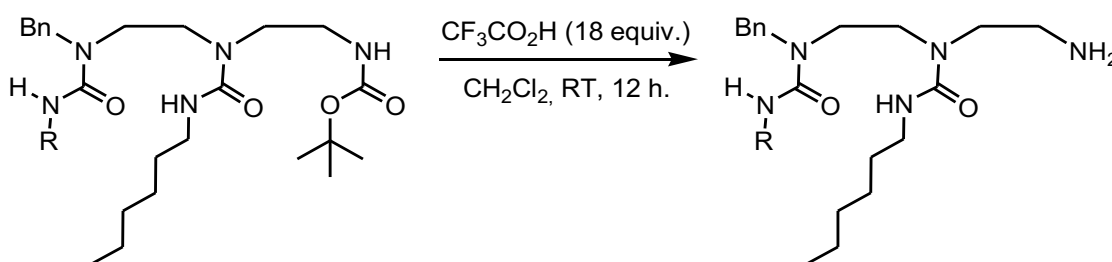

A 0.05 M solution of *N*-Boc protected amine in CH<sub>2</sub>Cl<sub>2</sub> and trifluoroacetic acid (18 equiv.) was stirred for 12 hours at 20 °C. Water then CH<sub>2</sub>Cl<sub>2</sub> were added, the organic layer was washed with aqueous NaHCO<sub>3</sub>, dried over Na<sub>2</sub>SO<sub>4</sub>, filtered and concentrated under reduced pressure. The residue was purified by flash chromatography on silica gel (eluent: CH<sub>2</sub>Cl<sub>2</sub>:MeOH 95:5) to give the unprotected amine.

#### General procedure F for the preparation of *N*-alkyl-*N'*-(*tert*butoxycarbonyl)diethylenetriamine by reductive amination of *N*-alkylethylenediamines

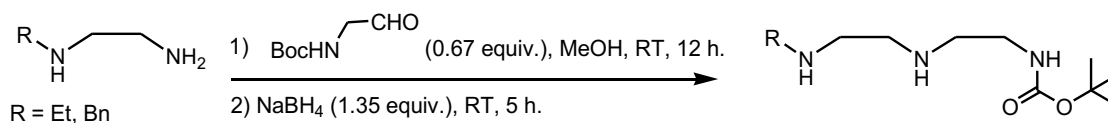

A solution of *N*-alkylethylenediamine (0.1 mM) and *N*-Boc-2-aminoacetaldehyde (0.67 equiv.) in anhydrous MeOH was stirred for 12 hours at 20 °C. Sodium borohydride NaBH<sub>4</sub> (1.35 equiv.) was added in 3 equal portions over 1 hour then the mixture was stirred for 5 hours. Water (2 mL) was added to the mixture and after stirring for 1 h, the mixture was concentrated under reduced pressure. The residue was purified by flash chromatography on silica gel using neat MeOH as eluent, to provide the desired compound.

### General procedure G for installing the *N*-(3,5-bis(trifluoromethyl)phenylcarbamoyl) substituent

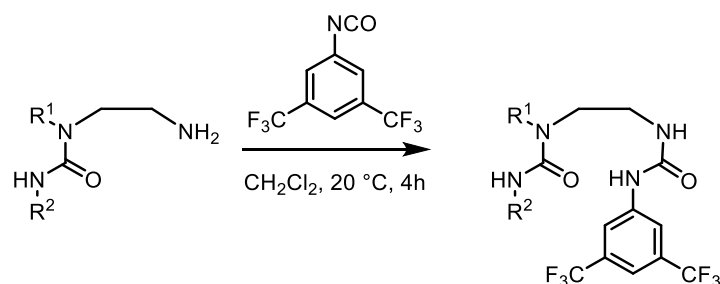

To a 0.05 M solution of primary amine in CH<sub>2</sub>Cl<sub>2</sub> was added dropwise at 20 °C the 3,5-bis(trifluoromethyl)phenyl isocyanate (1.2 equiv. per primary amine), the mixture was stirred for 4 hours. Water was added, the aqueous layer was extracted using CH<sub>2</sub>Cl<sub>2</sub>. The organic layer was dried over Na<sub>2</sub>SO<sub>4</sub>, filtered and concentrated under reduced pressure. The residue was purified by flash chromatography on silica (eluent: CH<sub>2</sub>Cl<sub>2</sub> : MeOH 95:5) to give the desired urea.

### General procedure H

A solution of oligoethylenediamine (1.00 equiv, 1.6 M) in anhydrous MeOH was cooled to -78 °C then ethyl trifluoroacetate (1 equiv. per primary amine) was added dropwise over 30 minutes. The resultant solution was stirred for 12 hours while allowing the temperature to raise to 20 °C. The mixture was concentrated under reduced pressure then purified using silica gel flash chromatography (eluent: 100% MeOH). The resulting compound was dissolved in anhydrous CH<sub>2</sub>Cl<sub>2</sub> to a concentration of 0.5M, then isocyanate (between 1.5 and 2 equiv. per secondary amine) was added to the mixture and the resultant solution was stirred between 16 hours and 2 days (for longer amines) at 40 °C. After concentration under reduced pressure, the residue was purified using silica gel flash chromatography (eluent: 97:3 CH<sub>2</sub>Cl<sub>2</sub>:MeOH).

## 3.2. Procedures and characterisation of compounds

### 2aa *N*-trifluoroacetyl-*N'*-benzylethylenediamine

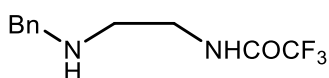

To a 0.4 M solution of *N*-benzylethylenediamine (2.5 g, 16.7 mmol) in anhydrous MeOH at -78 °C was added dropwise over 30 minutes ethyl trifluoroacetate (2 mL, 16.9 mmol, 1.01 equiv.). The mixture was stirred for 12 hours while allowing the temperature to slowly rise to 20 °C. The solvent was removed under reduced pressure, the residue was dissolved in CH<sub>2</sub>Cl<sub>2</sub> (40 mL). The organic layer was washed with water, dried over Na<sub>2</sub>SO<sub>4</sub>, filtered and concentrated under reduced pressure. The residue was purified using flash chromatography on silica gel (CH<sub>2</sub>Cl<sub>2</sub>:MeOH 95:5), providing the title compound as a yellow oil (3.683g, 15.0 mmol, 90%). Analytical data agree with reported literature<sup>1</sup>. <sup>1</sup>H NMR (400 MHz, CDCl<sub>3</sub>) δ 7.41 – 7.17 (m, 5H, 5 x CH<sub>Ph</sub>), 7.10 (bs, 1H, NHCOCF<sub>3</sub>), 3.77 (s, 2H, CH<sub>2</sub>Ph), 3.38 (s, 1H, NHBn), 3.36 (dd, *J* = 5.8, 6 Hz, 2H, CH<sub>2</sub>), 2.80 (t, *J* = 6 Hz, 2H, CH<sub>2</sub>). <sup>13</sup>C NMR (101 MHz, CDCl<sub>3</sub>) δ 157.3 (q, *J* = 36.8 Hz, CCF<sub>3</sub>), 139.8 (C<sub>Ph</sub>), 128.7 (2C, 2 x CH<sub>Ph</sub>), 127.4 (2C, 2 x CH<sub>Ph</sub>), 120.3 (CH<sub>Ph</sub>), 116.0 (q, *J* = 287.7 Hz, CF<sub>3</sub>), 53.3 (CH<sub>2</sub>Ph), 46.8 (CH<sub>2</sub>), 39.2 (CH<sub>2</sub>).

## 2ab *N*-Trifluoroacetyl-*N'*-(isopropylcarbamoyl)-*N'*-benzylethylenediamine

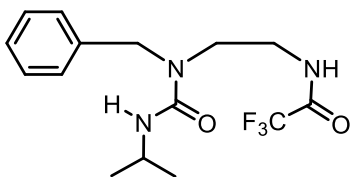

Following general procedure A with isopropyl isocyanate (0.476 mL, 4.8 mmol) and *N*-trifluoroacetyl-*N'*-benzylethylenediamine **2aa** (1 g, 4 mmol), the title compound was obtained as a white solid (1.3 g, 4.7 mmol, 98%). **<sup>1</sup>H NMR** (400 MHz, CDCl<sub>3</sub>) δ 8.72 (s, 1H, NHCOCF<sub>3</sub>), 7.38 (t, *J* = 7.2 Hz, 2H, 2 x CH<sub>Ph</sub>), 7.31 (t, *J* = 7.2 Hz, 1H, CH<sub>Ph</sub>), 7.19 (d, *J* = 7.4 Hz, 2H, 2 x CH<sub>Ph</sub>), 4.40 (s, 2H, CH<sub>2</sub>Ph), 4.30 (d, *J* = 7.3 Hz, 1H, NH*i*Pr), 3.79 – 3.99 (m, *J* = 6.6 Hz, 1H, CH(CH<sub>3</sub>)<sub>2</sub>), 3.62 (dd, *J* = 6.8, 4.2 Hz, 2H, CH<sub>2</sub>N), 3.43 (m, 2H, CH<sub>2</sub>NH), 1.04 (d, *J* = 6.5 Hz, 6H, 2 x CH<sub>3</sub>CH). **<sup>13</sup>C NMR** (101 MHz, CDCl<sub>3</sub>) δ 159.3 (C=O<sub>urea</sub>), 158.0 (q, *J* = 37.1 Hz, C=OCF<sub>3</sub>), 136.4 (C<sub>Ph</sub>), 129.4 (2C, 2 x CH<sub>Ph</sub>), 128.2 (CH<sub>Ph</sub>), 126.3 (2C, 2 x CH<sub>Ph</sub>), 116.04 (q, *J* = 287.3 Hz, CF<sub>3</sub>), 51.6 (CH<sub>2</sub>Ph), 46.3 (CH<sub>2</sub>N), 43.1 (CH(CH<sub>3</sub>)<sub>2</sub>), 40.9 (CH<sub>2</sub>NH), 23.1 (2CH<sub>3</sub>, (CH<sub>3</sub>)<sub>2</sub>CH). **FTIR (neat)** ν<sub>max</sub> = 3246, 3066, 2974, 1709, 1626, 1531, 1211, 1178, 1159 cm<sup>-1</sup>. **HR – MS** (ESI, positive ion mode) – *m/z* for [C<sub>15</sub>H<sub>20</sub>F<sub>3</sub>N<sub>3</sub>O<sub>2</sub>+H]<sup>+</sup> 332.1580, observed 332.1584 ; *m/z* for [C<sub>15</sub>H<sub>20</sub>F<sub>3</sub>N<sub>3</sub>O<sub>2</sub>+Na]<sup>+</sup> 354.1400, observed 354.1397. **MP** 93–94 °C.

## 2bb *N*-Trifluoroacetyl-*N'*-(tertbutylcarbamoyl)-*N'*-benzylethylenediamine

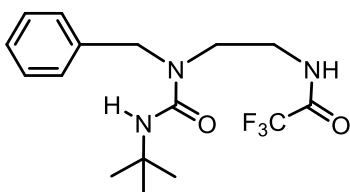

Following general procedure A with *tert*butyl isocyanate (475 mg, 4.8 mmol) and *N*-trifluoroacetyl-*N'*-benzylethylenediamine **2aa** (1 g, 4 mmol), the title compound was obtained as a white solid (1.39 g, 4 mmol, quantitative yield). **<sup>1</sup>H NMR** (400 MHz, CDCl<sub>3</sub>) δ 8.85 (s, 1H, NHBoc), 7.37 (t, *J* = 7.2 Hz, 2H, 2 x CH<sub>Ph</sub>), 7.30 (t, *J* = 7.2 Hz, 1H, CH<sub>Ph</sub>), 7.19 (d, *J* = 7.4 Hz, 2H, 2 x CH<sub>Ph</sub>), 4.37 (s, 3H, CH<sub>2</sub>Ph, NH), 3.63 (dd, *J* = 6.7, 4.2 Hz, 2H, CH<sub>2</sub>), 3.42 (q, *J* = 4.6 Hz, 2H, CH<sub>2</sub>NH), 1.21 (ms, 9H, 3 x CH<sub>3</sub>C). **<sup>13</sup>C NMR** (101 MHz, CDCl<sub>3</sub>) δ 159.2 (C=O<sub>urea</sub>), 158.0 (q, *J* = 37.0 Hz, C=OCF<sub>3</sub>), 136.5 (C<sub>Ph</sub>), 129.3 (2C, 2 x CH<sub>Ph</sub>), 128.2 (CH<sub>Ph</sub>), 126.3 (2C, 2 x CH<sub>Ph</sub>), 116.0 (q, *J* = 287.5 Hz, CF<sub>3</sub>), 51.9 (CH<sub>2</sub>Ph), 51.3 (C(CH<sub>3</sub>)<sub>3</sub>), 46.1 (CH<sub>2</sub>), 40.9 (CH<sub>2</sub>), 29.1 (3 x CH<sub>3</sub>). **FTIR (neat)** ν<sub>max</sub> = 3237, 2966, 1709, 1633, 1525, 1209, 1178, 1154 cm<sup>-1</sup>. **HR – MS** (ESI, positive ion mode) – *m/z* for [C<sub>16</sub>H<sub>22</sub>F<sub>3</sub>N<sub>3</sub>O<sub>2</sub>+H]<sup>+</sup> 346.1737, observed 346.1739 ; *m/z* for [C<sub>16</sub>H<sub>22</sub>F<sub>3</sub>N<sub>3</sub>O<sub>2</sub>+Na]<sup>+</sup> 368.1556, observed 368.1552. **MP** 98–99 °C.



### 2cb *N*-trifluoroacetyl-*N'*-(phenylcarbamoyl)-*N'*-benzylethylenediamine

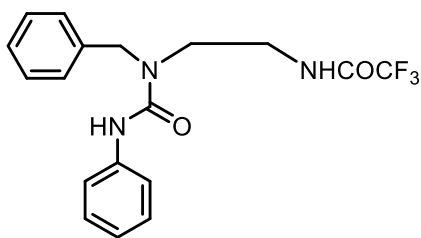

Following general procedure A with phenyl isocyanate (0.4 mL, 3.7 mmol) and *N*-trifluoroacetyl-*N'*-benzylethylenediamine **2aa** (750 mg, 3 mmol), the title compound was obtained as a white solid (1.095 g, 3 mmol, quantitative yield). **<sup>1</sup>H NMR** (400 MHz, DMSO)  $\delta$  9.53 (s, 1H, *NHCOCF*<sub>3</sub>), 8.46 (s, 1H, *NHPh*), 7.50 (d, *J* = 8.0 Hz, 2H, 2 x *CH*<sub>Ph</sub>), 7.37 (t, *J* = 7.5 Hz, 2H, 2 x *CH*<sub>Ph</sub>), 7.32 – 7.14 (m, 5H, 5 x *CH*<sub>Bn</sub>), 6.97 (t, *J* = 7.3 Hz, 1H, *CH*<sub>Ph</sub>), 4.65 (s, 2H, *CH*<sub>2</sub>*N*), 3.47 (d, *J* = 6.0 Hz, 2H, *CH*<sub>2</sub>*N*). **<sup>13</sup>C NMR** (101 MHz, DMSO)  $\delta$  156.6 (q, *J* = 36.2 Hz, *COCF*<sub>3</sub>), 155.4 (*CO*), 140.3 (*C*<sub>Ph</sub>), 138.4 (*C*<sub>Ph</sub>), 128.6 (2C, 2 x *CH*<sub>Ph</sub>), 128.3 (2C, 2 x *CH*<sub>Ph</sub>), 127.1 (3C, 3 x *CH*<sub>Ph</sub>), 122.0 (*CH*<sub>Ph</sub>), 120.1 (2C, 2 x *CH*<sub>Ph</sub>), 115.9 (q, *J* = 288.2 Hz, *CF*<sub>3</sub>) 49.7 (*CH*<sub>2</sub>*Ph*), 44.7 (*CH*<sub>2</sub>), 37.9 (*CH*<sub>2</sub>). **HR – MS** (ESI, positive ion mode) – *m/z* for [*C*<sub>18</sub>*H*<sub>18</sub>*N*<sub>3</sub>*O*<sub>2</sub>*F*<sub>3</sub>]<sup>+</sup> 365.1346, found 365.1338.

### 4ab *N*-trifluoroacetyl-*N'*-(isopropylcarbamoyl)-*N'*-ethylethylenediamine

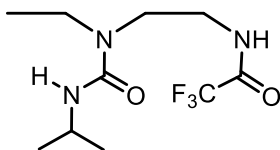

To a solution of *N*-ethylethylenediamine (0.2 mL, 1.9 mmol) in anhydrous MeOH (4 mL) at -78 °C was added dropwise ethyl trifluoroacetate (0.225 mL, 1.9 mmol, 1.01 equiv.). The mixture was stirred for 4 hours while allowing the temperature to raise to 20 °C. The solvent was removed under reduced pressure and the residue **4aa** was dissolved in anhydrous CH<sub>2</sub>Cl<sub>2</sub> (2 mL). Following general procedure A with isopropylisocyanate (0.185 mL, 1.9 mmol, 1.2 equiv.), the residue was purified by flash chromatography (CH<sub>2</sub>Cl<sub>2</sub>:MeOH 95:5) on silica gel to give the title compound as a colourless oil (520 mg, 1.9 mmol, quantitative). **<sup>1</sup>H NMR** (400 MHz, CDCl<sub>3</sub>)  $\delta$  8.95 (s, 1H, *NHCOCF*<sub>3</sub>), 4.8 (d, *J* = 7.6 Hz, 1H, *NH*<sub>*iPr*</sub>), 3.83 – 3.70 (m, 1H, *CH*(CH<sub>3</sub>)<sub>2</sub>), 3.35 – 3.22 (m, 4H, 2 x *CH*<sub>2</sub>), 3.10 (q, *J* = 7.2, 7.1 Hz, 2H, *CH*<sub>2</sub>), 1.12 – 0.79 (m, 9H, 3 x *CH*<sub>3</sub>). **<sup>13</sup>C NMR** (101 MHz, CDCl<sub>3</sub>)  $\delta$  158.3 (*C=O*<sub>*iPrNH*</sub>), 157.7 (q, *J* = 36.8 Hz, *C=OCF*<sub>3</sub>), 115.8 (q, *J* = 287.2 Hz, *CF*<sub>3</sub>), 44.5 (*CH*<sub>2</sub>), 42.6 (*CH*<sub>*iPr*</sub>), 41.9 (*CH*<sub>2</sub>), 40.1 (*CH*<sub>2</sub>), 22.7 (2C, 2 x *CH*<sub>3</sub>), 13.1 (*CH*<sub>3</sub>). **FTIR (neat)**  $\nu$ <sub>max</sub> = 3242, 2072, 2975, 2934, 1712, 1625, 1529, 1217, 1182, 1156 cm<sup>-1</sup>. **HR – MS** (ESI, positive ion mode) – *m/z* for [*C*<sub>10</sub>*H*<sub>18</sub>*F*<sub>3</sub>*N*<sub>3</sub>*O*<sub>2</sub>+*H*]<sup>+</sup> 270.1424, observed 270.1418.

### 2ac *N*-(isopropylcarbamoyl)-*N*'-benzylethylenediamine

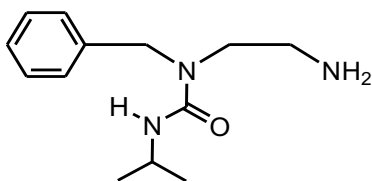

Following general procedure B with *N*-trifluoroacetyl-*N'*-(isopropylcarbamoyl)-*N'*-benzylethylenediamine **2ab** (1.2 g, 3.62 mmol), the title compound was obtained as an oil (667 mg, 2.82 mmol, 78%). **<sup>1</sup>H NMR** (400 MHz, CDCl<sub>3</sub>) δ 7.33 – 7.21 (m, 5H, 5 x CH<sub>Ar</sub>), 5.72 (m, 1H, NH<sub>IPr</sub>), 4.49 (s, 2H, CH<sub>2</sub>Ph), 3.94 (dq, *J* = 6.5 Hz, 1H, CH(CH<sub>3</sub>)<sub>2</sub>), 3.27 (t, *J* = 5.7 Hz, 2H, CH<sub>2</sub>NBn), 2.77 (t, *J* = 5.7 Hz, 2H, CH<sub>2</sub>NH<sub>2</sub>), 1.33 (s, 2H, NH<sub>2</sub>), 1.10 (d, *J* = 6.5 Hz, 6H, 2 x CH<sub>3</sub>CH). **<sup>13</sup>C NMR** (101 MHz, CDCl<sub>3</sub>) δ 159.0 (C=O), 138.7 (C<sub>Ar</sub>), 128.6 (2C, 2 x CH<sub>Ar</sub>), 127.4 (2C, 2 x CH<sub>Ar</sub>), 127.2 (CH<sub>Ar</sub>), 50.8 (CH<sub>2</sub>Ph), 50.6 (CH<sub>2</sub>NBn), 42.5 (CH(CH<sub>3</sub>)<sub>2</sub>), 40.9 (CH<sub>2</sub>NH<sub>2</sub>), 23.4 (2C, 2 x CH<sub>3IPr</sub>). **FTIR (neat)** ν<sub>max</sub> = 3353, 2969, 2924, 2875, 1621, 1530, 1453, 1211 cm<sup>-1</sup>. **HR – MS** (ESI, positive ion mode) – *m/z* for [C<sub>13</sub>H<sub>21</sub>N<sub>3</sub>O<sub>1</sub>+H]<sup>+</sup> 236.1757, observed 236.1755.

### 2bc *N*-(tertButylcarbamoyl)-*N*'-benzylethylenediamine

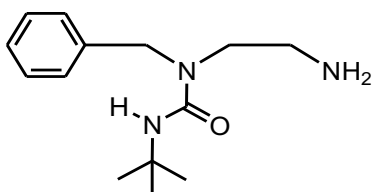

Following general procedure B with *N*-trifluoroacetyl-*N'*-(tertbutylcarbamoyl)-*N'*-benzylethylenediamine **2bb** (1.27 g, 3.68 mmol), the title product was obtained as an oil (700 mg, 2.76 mmol, 75%). **<sup>1</sup>H NMR** (400 MHz, CDCl<sub>3</sub>) δ 7.37 – 7.30 (m, 2H, 2 x CH<sub>Ar</sub>), 7.30 – 7.23 (m, 3H, 3 x CH<sub>Ar</sub>), 5.71 (s, 1H, NH), 4.47 (s, 2H, NH<sub>2</sub>), 4.25 (s, 2H, CH<sub>2</sub>Ph), 3.31 (t, *J* = 5.8 Hz, 2H, CH<sub>2</sub>NBn), 2.79 (t, *J* = 5.8 Hz, 2H, CH<sub>2</sub>NH<sub>2</sub>), 1.32 (s, 9H, 3 x CH<sub>3</sub>C). **<sup>13</sup>C NMR** (101 MHz, CDCl<sub>3</sub>) δ 158.8 (C=O), 138.8 (C<sub>Ar</sub>), 128.6 (2C, 2 x CH<sub>Ar</sub>), 127.3 (2C, 2 x CH<sub>Ar</sub>), 127.2 (CH<sub>Ar</sub>), 51.0 (CH<sub>2</sub>Ph), 50.7 (CH<sub>2</sub>NBn), 50.5 (C(CH<sub>3</sub>)<sub>3</sub>), 41.0 (CH<sub>2</sub>NH<sub>2</sub>), 29.4 (3C, 3 x CH<sub>3tBu</sub>). **FTIR (neat)** ν<sub>max</sub> = 3288, 2963, 1635, 1528, 1452, 1359, 1211 cm<sup>-1</sup>. **HR – MS** (ESI, positive ion mode) – *m/z* for [C<sub>14</sub>H<sub>23</sub>N<sub>3</sub>O<sub>1</sub>+H]<sup>+</sup> 250.1914, observed 250.1914.

### 2cc *N*-(phenylcarbamoyl)-*N*'-benzylethylenediamine

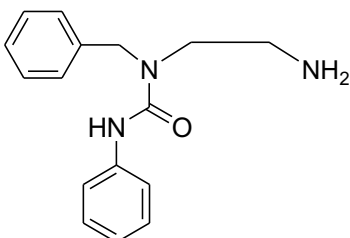

To a solution of *N*-trifluoroacetyl-*N'*-(phenylcarbamoyl)-*N'*-benzylethylenediamine **2cb** (738 mg, 3 mmol) in methanol (40 mL) was added an aqueous solution of 0.2M sodium hydroxide (15 mL, 3 mmol) and the mixture was stirred at 20 °C for 15 h. Methanol was removed under reduced pressure, the aqueous phase was extracted with dichloromethane. The organic phase was dried (Na<sub>2</sub>SO<sub>4</sub>), concentrated under reduced pressure. The residue was purified by chromatography on silica (eluent/ dichloromethane methanol 95:5 to 1:1) to yield the title compound (590 mg, 74%). **<sup>1</sup>H NMR** (400 MHz,

CDCl<sub>3</sub>)  $\delta$  9.52 (s, 1H, NH), 7.28 (d,  $J$  = 8.0 Hz, 2H, 2 x CH<sub>Ph</sub>), 7.24 – 7.07 (m, 7H, 7 x CH<sub>Ph</sub>), 6.85 (t,  $J$  = 7.4 Hz, 1H, CH<sub>Ph</sub>), 4.40 (s, 2H, CH<sub>2</sub>Ph), 3.22 (t,  $J$  = 5.1 Hz, 2H, CH<sub>2</sub>), 2.89 (s, 3H, NH<sub>3</sub><sup>+</sup>), 2.65 (t,  $J$  = 5.1 Hz, 2H, CH<sub>2</sub>). <sup>13</sup>C NMR (101 MHz, CDCl<sub>3</sub>)  $\delta$  157.7 (C=O), 140.2 (C<sub>Ph</sub>), 138.1 (C<sub>Bn</sub>), 128.7 (2C, 2 x CH<sub>Ph</sub>), 128.6 (2C, 2 x CH<sub>Bn</sub>), 127.6 (2C, 2 x CH<sub>Bn</sub>), 127.3 (CH<sub>Bn para</sub>), 122.2 (CH<sub>Ph para</sub>), 119.6 (2C, 2 x CH<sub>Ph ortho</sub>), 50.7 (CH<sub>2</sub>Ph), 49.7 (CH<sub>2</sub>), 40.4 (CH<sub>2</sub>). HR – MS (ESI, negative ion mode) –  $m/z$  for [C<sub>16</sub>H<sub>18</sub>N<sub>3</sub>O]<sup>+</sup> 268.1455, found 268.1443 ; HR – MS (ESI, positive ion mode) –  $m/z$  for [C<sub>16</sub>H<sub>20</sub>N<sub>3</sub>O]<sup>+</sup> 270.1601, found 270.1585.

#### 4ac *N*-(isopropylcarbamoyl)-*N*'-ethylethylenediamine

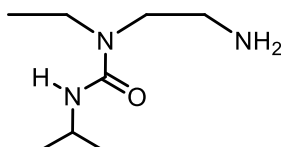

Following general procedure B, *N*-trifluoroacetyl-*N*'-(isopropylcarbamoyl)-*N*'-ethylethylenediamine **4ab** (493 mg, 1.8 mmol) afforded the title product as an oil (290 mg, 1.67 mmol, 94%). <sup>1</sup>H NMR (400 MHz, CDCl<sub>3</sub>)  $\delta$  5.43 (d,  $J$  = 6.5 Hz, 1H, NH), 3.93 – 3.74 (m,  $J$  = 6.6 Hz, 1H CH<sub>iPr</sub>), 3.29 – 3.09 (m, 4H, 2 x CH<sub>2</sub>), 2.78 (t,  $J$  = 5.8 Hz, 2H, CH<sub>2</sub>N), 1.33 (d,  $J$  = 7.1 Hz, 2H, NH<sub>2</sub>), 1.13 – 0.93 (m, 9H, 3 x CH<sub>3</sub>). <sup>13</sup>C NMR (101 MHz, CDCl<sub>3</sub>)  $\delta$  158.4 (C=O), 50.0 (CH<sub>2</sub>N), 42.3 (CH<sub>2</sub>), 41.9 (CH<sub>2</sub>), 41.3 (CH<sub>2</sub>), 23.5 (2C, 2x CH<sub>3iPr</sub>), 13.5 (CH<sub>3Et</sub>). FTIR (neat)  $\nu_{max}$  = 3332, 2970, 2930, 2874, 1518, 1534, 1490, 1219 cm<sup>-1</sup>. HR – MS (ESI, positive ion mode) –  $m/z$  for [C<sub>8</sub>H<sub>19</sub>N<sub>3</sub>O+H]<sup>+</sup> 174.1601, observed 174.1595.

#### 2a *N*-(3,5-bis(trifluoromethyl)phenylcarbamoyl)-*N*'-(isopropylcarbamoyl)-*N*'-benzylethylenediamine

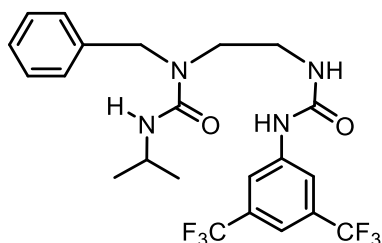

To a solution of *N*-(isopropylcarbamoyl)-*N*'-benzylethylenediamine **2ac** (44 mg, 0.17 mmol) in CH<sub>2</sub>Cl<sub>2</sub> (1 mL) was added dropwise at 20 °C 3,5-bis(trifluoromethyl)phenyl isocyanate (0.032 mL, 0.18 mmol), the mixture was stirred for 12 hours. The mixture was concentrated under reduced pressure, the residue was purified by flash chromatography (eluent: CH<sub>2</sub>Cl<sub>2</sub>:MeOH 95:5) on silica gel to afford *N*-(3,5-bis(trifluoromethyl)phenylcarbamoyl)-*N*'-(isopropylcarbamoyl)-*N*'-benzylethylenediamine **2a** (77 mg, 0.136 mmol, 88%) as a white solid. <sup>1</sup>H NMR (400 MHz, CDCl<sub>3</sub>)  $\delta$  8.90 (s, 1H, NH<sub>Ar</sub>), 7.78 (s, 2H, 2 x CH<sub>Ar</sub>), 7.33 (d,  $J$  = 2.0 Hz, 1H, CH<sub>Ar</sub>), 7.22 – 7.13 (m, 2H, 2 x CH<sub>Ar</sub>), 7.14 – 7.06 (m, 1H, CH<sub>Ar</sub>), 7.02 (dd,  $J$  = 7.0, 1.7 Hz, 2H, 2 x CH<sub>Ar</sub>), 6.67 – 6.14 (m, 2H, 2 x NH), 4.34 (s, 2H, CH<sub>2</sub>Ph), 3.93 – 3.68 (q,  $J$  = 6.6 Hz, 1H, CH(CH<sub>3</sub>)<sub>2</sub>), 3.29 – 3.02 (m, 2H, CH<sub>2</sub>), 3.00 – 2.72 (d,  $J$  = 8.8 Hz, 2H, CH<sub>2</sub>NH), 1.19 – 0.88 (d,  $J$  = 6.5 Hz, 6H, 2 x CH<sub>3</sub>). <sup>13</sup>C NMR (101 MHz, CDCl<sub>3</sub>)  $\delta$  158.7 (C=O<sub>NH*iPr*</sub>), 156.8 (C=O<sub>Ar</sub>), 141.5 (C<sub>Ar</sub>), 137.9 (C<sub>Ph</sub>), 132.1 (q,  $J$  = 33.1 Hz, 2C, 2 x CCF<sub>3</sub>), 129.0 (2C, 2 x CH<sub>Ar</sub>), 127.7 (CH<sub>Ar</sub>), 126.5 (2C, 2 x CH<sub>Ar</sub>), 123.5 (q,  $J$  = 271.5 Hz, 2C, 2 x CF<sub>3</sub>), 118.0 (2C, 2 x CH<sub>Ar</sub>), 115.1 (CH<sub>Ar</sub>), 51.2 (CH<sub>2</sub>Ph), 47.0 (CH<sub>2</sub>N), 43.5 (CH<sub>iPr</sub>), 38.9 (CH<sub>2</sub>NH), 22.9 (2C, 2 x

CH<sub>3</sub>). **FTIR (neat)**  $\nu_{\text{max}}$  = 3299, 2975, 1692, 1609, 1567, 1473, 1386, 1276, 1175, 1128 cm<sup>-1</sup>. **HR – MS** (ESI, positive ion mode) –  $m/z$  for [C<sub>22</sub>H<sub>24</sub>F<sub>6</sub>N<sub>4</sub>O<sub>2</sub>+H]<sup>+</sup> 491.1876, observed 491.1863. **MP** 162 – 164 °C.

### 2b *N*-(3,5-bis(trifluoromethyl)phenylcarbamoyl)-*N'*-(tertbutylcarbamoyl)-*N'*-benzylethylenediamine

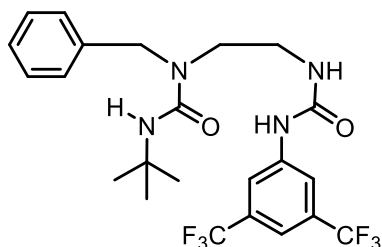

To a solution of *N*-(tertbutylcarbamoyl)-*N'*-benzylethylenediamine **2bc** (50 mg, 0.2 mmol) in CH<sub>2</sub>Cl<sub>2</sub> (1 mL) was added dropwise at 20 °C 3,5-bis(trifluoromethyl)phenyl isocyanate (0.038 mL, 0.22 mmol), the mixture was stirred for 12 hours. The mixture was concentrated under reduced pressure, the residue was purified by flash chromatography on silica gel (eluent: CH<sub>2</sub>Cl<sub>2</sub>:MeOH 95:5) to afford *N*-(3,5-bis(trifluoromethyl)phenylcarbamoyl)-*N'*-(tertbutylcarbamoyl)-*N'*-benzylethylenediamine **2b** (84 mg, 0.168 mmol, 84%) as a white solid. **<sup>1</sup>H NMR** (400 MHz, CDCl<sub>3</sub>)  $\delta$  8.79 (s, 1H, NH<sub>Ar</sub>), 7.94 (s, 2H, 2 x CH<sub>Ar</sub>), 7.42 (s, 1H, CH<sub>Ar</sub>), 7.34 – 7.27 (m, 2H, 2 x CH<sub>Ar</sub>), 7.27 – 7.19 (t,  $J$  = 7.4 Hz, 1H, CH<sub>Ar</sub>), 7.19 – 7.10 (m, 2H, 2 x CH<sub>Ar</sub>), 6.30 (bm, 1H, NHCH<sub>2</sub>), 5.29 (s, 1H, NH), 4.43 (s, 2H, CH<sub>2</sub>Ph), 3.38 (m,  $J$  = 7.1 Hz, 2H, CH<sub>2</sub>), 3.21 (m, 2H, CH<sub>2</sub>NH), 1.29 (s, 9H (CH<sub>3</sub>)<sub>3</sub>C). **<sup>13</sup>C NMR** (101 MHz, CDCl<sub>3</sub>)  $\delta$  158.6 (C=ONHtBu), 156.4 (C=O), 141.5 (C<sub>Ar</sub>), 137.4 (C<sub>Ph</sub>), 132.0 (q, 2C,  $J$  = 33.1 Hz, 2 x CCF<sub>3</sub>), 129.1 (2C, 2 x CH<sub>Ph</sub>), 127.6 (CH<sub>Ph</sub>), 126.5 (2C, 2 x CH<sub>Ph</sub>), 123.5 (q, 2C,  $J$  = 272.6 Hz, 2 x CF<sub>3</sub>), 118.1 (2C, 2 x CH<sub>Ar</sub>), 115.1 (CH<sub>Ar</sub>), 51.4 (CH<sub>2</sub>Ph), 47.3 (CH<sub>2</sub>N), 39.0 (CH<sub>2</sub>NH), 29.3 (3C, (CH<sub>3</sub>)<sub>3</sub>C). **FTIR (neat)**  $\nu_{\text{max}}$  = 3327, 2982, 1693, 1611, 1556, 1473, 1385, 1274, 1173, 1125 cm<sup>-1</sup>. **HR – MS** (ESI, positive ion mode) –  $m/z$  for [C<sub>23</sub>H<sub>26</sub>F<sub>6</sub>N<sub>4</sub>O<sub>2</sub>+H]<sup>+</sup> 505.2033, observed 505.2021. **MP** 149 °C.

### 2c *N*-(phenylcarbamoyl)-*N'*-benzyl-*N'*-(3,5-bis(trifluoromethyl)phenylcarbamoyl)ethylenediamine

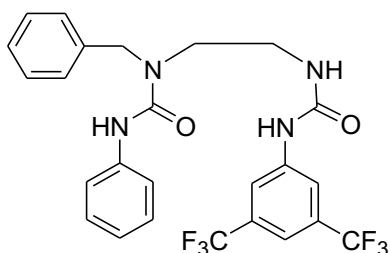

To a solution of *N*-(phenylcarbamoyl)-*N'*-benzylethylenediamine **2cc** (62 mg, 0.23 mmol) in dichloromethane (3 mL) was added 3,5-bis(trifluoromethyl)phenylisocyanate (0.04 mL, 0.23 mmol) and the mixture was stirred at 20 °C for 12 h. After concentration under reduced pressure, the residue was purified by chromatography on silica (eluent dichloromethane methanol 95:5) to yield the title product as a white solid (120 mg, quantitative). **<sup>1</sup>H NMR** (400 MHz, DMSO)  $\delta$  9.50 (s, 1H, NH), 8.70 (s, 1H, NH), 8.16 – 8.07 (s, 2H, 2 x CH<sub>(CF<sub>3</sub>)<sub>2</sub>Ph ortho</sub>), 7.60 – 7.53 (m, 3H, CH<sub>(CF<sub>3</sub>)<sub>2</sub>Ph para</sub>, 2 x CH<sub>Ph ortho</sub>), 7.39 – 7.32 (m, 2H, 2 x CH<sub>Bn</sub>), 7.32 – 7.24 (m, 3H, 3 x CH<sub>Bn</sub>), 7.23 – 7.17 (m, 2H, 2 x CH<sub>Ph meta</sub>), 6.97 – 6.90 (td,  $J$  = 7.3, Hz, 1H, CH<sub>Ph para</sub>), 6.70 (t,  $J$  = 5.5 Hz, 1H, NHCH<sub>2</sub>), 4.63 (s, 2H, CH<sub>2</sub>Ph), 3.43 (t,  $J$  = 6.9 Hz, 2H, CH<sub>2</sub>), 3.31 – 3.21 (td,  $J$  = 5.5, 6.9 Hz, 2H, CH<sub>2</sub>NH). **<sup>13</sup>C NMR** (101 MHz, DMSO)  $\delta$  155.6

(C=O), 155.4 (C=O), 142.4 ( $C_{(CF_3)_2Ph}$ ), 140.6 ( $C_{Ph}$ ), 138.8 ( $C_{Bn}$ ), 130.6 (q,  $J = 32.5$  Hz, 2 x  $CCF_3$ ), 128.5 (2C, 2 x  $CH_{Ph}$  meta), 128.2 (2C, 2 x  $CH_{Bn}$ ), 127.3 (2C, 2 x  $CH_{Bn}$ ), 127.0 (1C,  $CH_{Bn}$  para), 123.3 (q,  $J = 272.6$  Hz, 2C, 2 x  $CF_3$ ), 121.8 (1C,  $CH_{Ph}$  para), 119.6 (2C, 2 x  $CH_{Ph}$  ortho), 117.50 (d,  $J = 4.0$  Hz, 2C, 2 x  $CH_{(CF_3)_2Ph}$  ortho), 113.6 (m, 1C,  $CH_{(CF_3)_2Ph}$  para), 49.7 (1C,  $CH_2Ph$ ), 45.8 (1C,  $CH_2$ ), 38.5 (1C,  $CH_2NH$ ). **HR – MS** (ESI, positive ion mode) –  $m/z$  for  $[C_{25}H_{23}F_6N_4O_2]^+$  525.1720, found 525.1708. **MP** 206-208 °C.

#### 4a *N*-(3,5-bis(trifluoromethyl)phenylcarbamoyl)-*N'*-(isopropylcarbamoyl)-*N'*-ethylethylenediamine

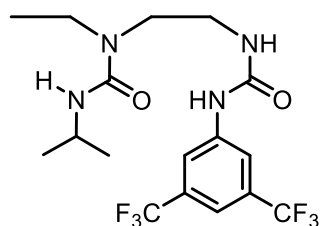

To a solution of *N*-(isopropylcarbamoyl)-*N'*-ethylethylenediamine **4ca** (24 mg, 0.14 mmol) in dichloromethane (3 mL) was added 3,5-bis(trifluoromethyl)phenylisocyanate (0.027 mL, 0.15 mmol) and the mixture was stirred at 20 °C for 12 h. After concentration under reduced pressure, the residue was purified by chromatography on silica (eluent dichloromethane methanol 95:5) to yield the title product as a white solid (45 mg, 75%). **<sup>1</sup>H NMR** (400 MHz,  $CDCl_3$ )  $\delta$  8.92 (s, 1H, NH), 7.86 (s, 2H, 2 x  $CH_{Ph}$ ), 7.34 (s, 1H,  $CH_{Ph}$ ), 6.53 (s, 1H, NH), 5.12 (s, 1H,  $NH^iPr$ ), 3.92 – 3.75 (m,  $J = 6.6$  Hz, 1H,  $CH(CH_3)_2$ ), 3.31 (tt,  $J = 10.8, 4.4$  Hz, 4H, 2 x  $CH_2N$ ), 3.21 (q,  $J = 7.1$  Hz, 2H,  $NCH_2CH_3$ ), 1.12 – 1.05 (m, 9H, 3 x  $CH_3$ ). **<sup>13</sup>C NMR** (101 MHz,  $CDCl_3$ )  $\delta$  158.1 ( $C=O^iPr$ ), 156.5 (C=O), 141.6 ( $C_{Ph}NH$ ), 132.1 (q,  $J = 33.1$  Hz, 2C, 2 x  $CCF_3$ ), 123.5 (q,  $J = 272.6$  Hz, 2 x  $CF_3$ ), 118.0 (2C, 2 x  $CH_{Ph}$ ), 115.0 (hept,  $J = 3.7$  Hz,  $CH_{Ph}$ ), 46.4 ( $CH_2$ ), 43.2 ( $CH(CH_3)_2$ ), 42.3 ( $CH_2$ ), 39.2 ( $CH_2$ ), 23.2 (2C,  $(CH_3)_2CH$ ), 13.7 ( $CH_3CH_2$ ). **HR – MS** (ESI, positive ion mode) –  $m/z$  for  $[C_{17}H_{23}N_4O_2F_6]^+$  4429.1720, found 429.1708. **MP** 176-178 °C.

#### 4b *N*-(3,5-bis(trifluoromethyl)phenylcarbamoyl)-*N'*-(phenylcarbamoyl)-*N'*-ethylethylenediamine

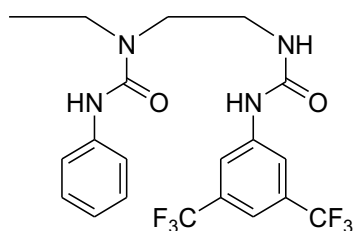

To a solution of *N*-(3,5-bis(trifluoromethyl)phenylcarbamoyl)ethylethylenediamine **4ac** (33 mg, 0.15 mmol) in dichloromethane (1.5 mL) was added phenyl isocyanate (0.015 mL, 0.15 mmol) and the mixture was stirred at 20 °C for 12 h, after which the mixture was concentrated under reduced pressure. The residue was washed with dichloromethane to afford the title product as a white solid (68 mg, quantitative). **<sup>1</sup>H NMR** (400 MHz, DMSO)  $\delta$  9.50 (s, 1H,  $(CF_3)_2PhNH$ ), 8.43 (s, 1H,  $NHPh$ ), 8.12 (d,  $J = 1.6$  Hz, 2H, 2 x  $CH_{(CF_3)_2Ph}$ ), 7.55 (s, 1H,  $CH_{(CF_3)_2Ph}$ ), 7.47 (d,  $J = 7.7$  Hz, 2H, 2 x  $CH_{Ph}$  ortho), 7.27 – 7.12 (dd,  $J = 7.7, 7.2$  Hz, 2H,  $CH_{Ph}$  meta), 6.98 – 6.86 (t,  $J = 7.2$  Hz, 1H,  $CH_{Ph}$  para), 6.68 (t,  $J = 5.5$  Hz, 1H,  $NHCH_2$ ), 3.44 – 3.38 (m, 4H, 2 x  $CH_2$ ), 3.29 (q,  $J = 6.3$  Hz, 2H,  $CH_2$ ), 1.10 (t,  $J =$

7.0 Hz, 3H, CH<sub>3</sub>). <sup>13</sup>C NMR (101 MHz, DMSO) δ 155.5 (C=ONH(CF<sub>3</sub>)<sub>2</sub>Ph), 154.9 (C=ONHPh), 142.4 (C<sub>(CF<sub>3</sub>)<sub>2</sub>Ph</sub>), 140.6 (C<sub>Ph</sub>), 130.63 (q, *J* = 32.5 Hz, 2C, 2 x C(CF<sub>3</sub>)), 128.2 (2C, 2 x CH<sub>Ph meta</sub>), 123.4 (q, *J* = 272.6 Hz, 2C, 2 x CF<sub>3</sub>), 121.7 (CH<sub>Ph para</sub>), 119.7 (2C, 2 x CH<sub>Ph ortho</sub>), 117.4 (2C, 2 x CH<sub>(CF<sub>3</sub>)<sub>2</sub>Ph</sub>), 113.7 (1C, CH<sub>(CF<sub>3</sub>)<sub>2</sub>Ph</sub>), 45.7 (CH<sub>2</sub>), 41.6 (CH<sub>2</sub>CH<sub>3</sub>), 38.8 (CH<sub>2</sub>), 13.8 (CH<sub>3</sub>). **HR – MS** (ESI, positive ion mode) – *m/z* for [C<sub>20</sub>H<sub>21</sub>N<sub>6</sub>O<sub>2</sub>N<sub>4</sub>]<sup>+</sup> 463.1563, found 463.1551. **MP** 193-195 °C.

**1ba** *N*-(isopropylcarbamoyl)-*N*-benzyl-*N'*-(tertbutoxycarbonyl)diethylenetriamine

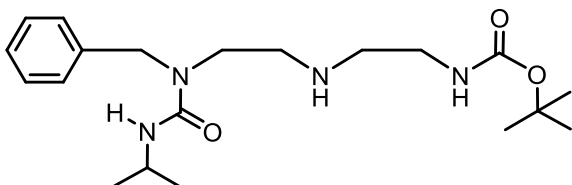

Following general procedure C, *N*-(isopropylcarbamoyl)-*N*-benzylethylenediamine **2ac** (667 mg, 2.84 mmol) reacted with *N*-Boc-2-aminoacetaldehyde (677 mg, 4.26 mmol) to afford the title compound as colourless oil (260 mg, 0.71 mmol, 25% after chromatography). <sup>1</sup>H NMR (400 MHz, CDCl<sub>3</sub>) δ 7.29 – 7.22 (m, 2H, 3 x CH<sub>Ar</sub>), 7.22 – 7.15 (m, 3H, 3 x CH<sub>Ar</sub>), 5.40 (m, 1H, NH), 4.82 (m, 1H, NH), 4.41 (s, 2H, CH<sub>2</sub>Ph), 3.97 – 3.80 (m, 1H, CH(CH<sub>3</sub>)<sub>2</sub>), 3.26 (t, *J* = 5.7 Hz, 2H, CH<sub>2</sub>NBn), 3.11 (m, 2H, CH<sub>2</sub>NHBoc), 2.67 – 2.58 (m, 4H, 2 x CH<sub>2</sub>NH), 1.60 (s, 1H, NH), 1.37 (s, 9H, 3 x CH<sub>3</sub>C), 1.04 (d, *J* = 6.5 Hz, 6H, 2 x CH<sub>3</sub>CH). <sup>13</sup>C NMR (101 MHz, CDCl<sub>3</sub>) δ 158.8 (C=O<sub>urea</sub>), 156.2 (C=O<sub>Boc</sub>), 138.6 (C<sub>Ar</sub>), 128.8 (2C, 2 x CH<sub>Ar</sub>), 127.5 (2C, 2 x CH<sub>Ar</sub>), 127.4 (CH<sub>Ar</sub>), 79.4 (C(CH<sub>3</sub>)<sub>3</sub>), 51.0 (CH<sub>2</sub>Ph), 49.3 (CH<sub>2</sub>NH), 48.4 (CH<sub>2</sub>NH), 48.2 (CH<sub>2</sub>NBn), 42.6 (CH(CH<sub>3</sub>)<sub>2</sub>), 40.3 (CH<sub>2</sub>NHBoc), 28.5 (3C, 3 x CH<sub>3</sub>C), 23.5 (2C, 2 x CH<sub>3</sub>Pr). **FTIR (neat)** ν<sub>max</sub> = 3304, 2971, 2930, 1698, 1627, 1529, 1364, 1248, 1171 cm<sup>-1</sup>. **HR – MS** (ESI, positive ion mode) – *m/z* for [C<sub>20</sub>H<sub>34</sub>N<sub>4</sub>O<sub>3</sub>+H]<sup>+</sup> 379.2704, observed 379.2699.

**1bb** *N*-(isopropylcarbamoyl)-*N*-benzyl-*N'*-(tertbutoxycarbonyl)-*N''*-(hexylcarbamoyl)diethylenetriamine

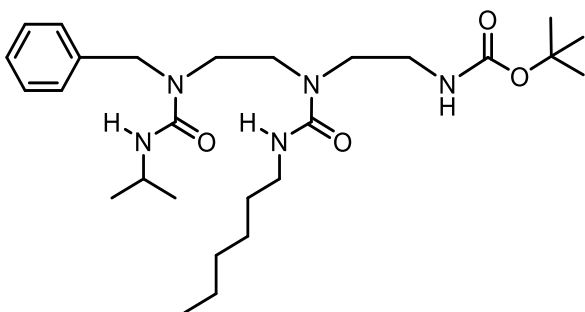

Following general procedure D with *N*-(isopropylcarbamoyl)-*N*-benzyl-*N'*-(tertbutoxycarbonyl)diethylenetriamine **1ba** (472 mg, 1.25 mmol) and hexyl isocyanate (1.5 equiv.) afforded the title compound (495 mg, 0.98 mmol, 79%) as a colourless oil. <sup>1</sup>H NMR (400 MHz, CDCl<sub>3</sub>) δ 7.31 (dd, *J* = 7.9, 6.4 Hz, 2H, 2 x CH<sub>Bn</sub>), 7.25 (d, *J* = 7.3 Hz, 1H, CH<sub>Ph</sub>), 7.22 – 7.17 (m, 2H, 2 x CH<sub>Bn</sub>), 6.20 (s, 1H, NHBoc), 5.44 – 5.06 (m, 2H, 2 x NH), 4.44 (s, 2H, CH<sub>2</sub>Ph), 3.99 – 3.83 (m, 1H, CH(CH<sub>3</sub>)<sub>2</sub>), 3.38 – 3.26 (m, 2H, CH<sub>2</sub>NBn), 3.26 – 3.15 (m, 6H, 3 x CH<sub>2</sub>N), 3.08 (q, *J* = 6.4 Hz, 2H, CH<sub>2</sub>NH), 1.52 (t, *J* = 7.3 Hz, 2H, CH<sub>2</sub>), 1.40 (s, 9H, (CH<sub>3</sub>)<sub>3</sub>CO), 1.37 – 1.23 (m, 6H, 3 x CH<sub>2</sub>), 1.09 (d, *J* = 6.5 Hz, 6H, (CH<sub>3</sub>)<sub>2</sub>CH), 0.96 – 0.77 (m, 3H, CH<sub>3</sub> hexyl). <sup>13</sup>C NMR (101 MHz, CDCl<sub>3</sub>) δ 158.7 (C=O), 158.0 (C=O), 156.7 (C=O), 138.1 (C<sub>Ar</sub>), 128.8 (2C, 2 x CH<sub>Ar</sub>), 127.5 (CH<sub>Ar</sub>), 127.0 (2C, 2 x CH<sub>Ar</sub>),

79.5 (C(CH<sub>3</sub>)<sub>3</sub>O), 51.4 (CH<sub>2</sub>Ph), 47.5 (CH<sub>2</sub>N), 46.8 (2C, 2 x CH<sub>2</sub>N), 46.6 (CH<sub>2</sub>N), 42.7 (CH<sub>2</sub>), 41.0 (CH<sub>2</sub>), 39.9 (CH<sub>2</sub>NH), 31.6 (CH<sub>2</sub>), 29.9 (CH<sub>2</sub>), 28.4 ((CH<sub>3</sub>)<sub>3</sub>CO), 26.7 (CH<sub>2</sub>), 23.2 ((CH<sub>3</sub>)<sub>2</sub>CH), 22.6 (CH<sub>2</sub>), 14.1 (CH<sub>3</sub>). **FTIR (neat)**  $\nu_{\text{max}}$  = 3299, 2967, 2929, 2871, 1689, 1626, 1536, 1355, 1248, 1173 cm<sup>-1</sup>. **HR – MS** (ESI, positive ion mode) –  $m/z$  for [C<sub>27</sub>H<sub>47</sub>N<sub>5</sub>O<sub>4</sub>+H]<sup>+</sup> 506.3701, observed 506.3687.

**1cb N-(phenylcarbamoyl)-N-benzyl-N'-(tertbutoxycarbonyl)-N''-(butylcarbamoyl)diethylenetriamine**

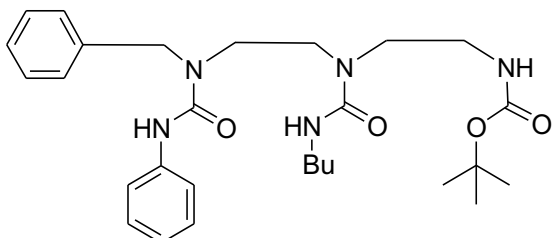

Following general procedure C, *N*-(isopropylcarbamoyl)-*N*-benzylethylenediamine **2cb** (667 mg, 2.84 mmol) reacted with *N*-Boc-2-aminoacetaldehyde (677 mg, 4.26 mmol) to afford **1ca**. Following general procedure D with the amine **1ca** (107 mg, 0.26 mmol) in CH<sub>2</sub>Cl<sub>2</sub> (1 mL) and butyl isocyanate (0.03 mL, 0.26 mmol), the product was obtained after purification by silica gel flash chromatography (CH<sub>2</sub>Cl<sub>2</sub>:MeOH 9:1) (93 mg, 0.18 mmol, 70%). **<sup>1</sup>H NMR** (400 MHz, CDCl<sub>3</sub>)  $\delta$  7.54 (d,  $J$  = 7.9 Hz, 2H, 2 x CH<sub>Ph ortho</sub>), 7.36 – 7.09 (m, 7H, NHPH, 2 x CH<sub>Ph meta</sub>, 4 x CH<sub>Bn</sub>), 6.95 – 6.81 (m, 2H, 2 x CH<sub>Ph para</sub>), 6.04 (s, 1H, NHBu), 5.13 (t,  $J$  = 5.6 Hz, 1H, NHBoc), 4.49 (s, 2H, CH<sub>2</sub>Ph), 3.32 (t,  $J$  = 7.3 Hz, 2H, CH<sub>2</sub>N), 3.20 – 3.10 (m, 4H, CH<sub>2</sub>NH<sub>Bu</sub>, CH<sub>2</sub>N), 3.06 (t,  $J$  = 7.2 Hz, 2H, CH<sub>2</sub>N), 2.95 (td,  $J$  = 6.8, 5.6 Hz, 2H, CH<sub>2</sub>NHBoc), 1.42 – 1.38 (m, 2H, CH<sub>2</sub>), 1.33 (s, 9H, (CH<sub>3</sub>)<sub>3</sub>C), 1.30 -1.26 (m, 2H, CH<sub>2</sub>), 0.83 (t, 3H,  $J$  = 7.3 Hz, CH<sub>3Bu</sub>). **<sup>13</sup>C NMR** (101 MHz, CDCl<sub>3</sub>)  $\delta$  158.8 (C=ONHBu), 156.9 (C=ONHBoc), 156.2 (C=ONHPh), 140.2 (C<sub>Ph</sub>), 138.2 (C<sub>Bn</sub>), 128.8 (2C, CH<sub>meta</sub>), 128.6(3C, CH<sub>Ph para</sub>, 2 x CH<sub>Bn</sub>), 127.5 (2C, CH<sub>Bn</sub>), 122.4 (1C, CH<sub>Ph para</sub>), 119.7 (2C, 2 x CH<sub>Ph ortho</sub>), 79.9 (1C, C(CH<sub>3</sub>)<sub>3</sub>), 51.1 (CH<sub>2</sub>Ph), 47.8 (CH<sub>2</sub>N), 47.6 (CH<sub>2</sub>N), 46.0 (CH<sub>2</sub>N), 40.7 (CH<sub>2</sub>N), 39.8 (CH<sub>2</sub>NHBoc), 31.9 (1C, CH<sub>2</sub>), 28.3 (3C, (CH<sub>3</sub>)<sub>3</sub>C), 20.1 (1C, CH<sub>2</sub>), 13.9 (1C, CH<sub>3</sub>). **HR – MS** (ESI, positive ion mode) –  $m/z$  for [C<sub>28</sub>H<sub>41</sub>N<sub>5</sub>O<sub>4</sub>Na]<sup>+</sup> 534.3051, observed 534.3031.

**1bc N-(isopropylcarbamoyl)-N-benzyl-N''-(hexylcarbamoyl)diethylenetriamine**

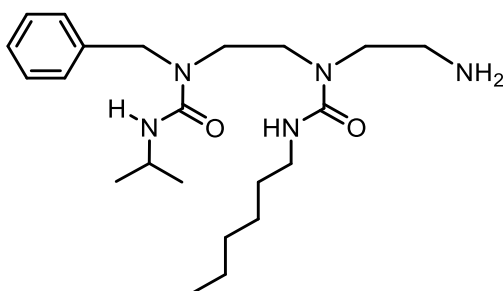

Following general procedure E with *N*-(isopropylcarbamoyl)-*N*-benzyl-*N'*-(*tert*butoxycarbonyl)-*N''*-(hexylcarbamoyl)diethylenetriamine **1bb** (195 mg, 0.38 mmol), the title compound was obtained as a colourless oil (154 mg, 0.38 mmol, quantitative). **<sup>1</sup>H NMR** (400 MHz, CDCl<sub>3</sub>)  $\delta$  7.22 (dd,  $J$  = 8.1 Hz, 6.4 Hz, 2H, 2 x CH<sub>Ar</sub>), 7.18 – 7.06 (m, 3H, 3 x CH<sub>Ar</sub>), 6.52 (t,  $J$  = 5.3 Hz, 1H, NH<sub>Hexyl</sub>), 5.33 (m, 1H, NH<sub>iPr</sub>), 4.37 (s, 2H, CH<sub>2</sub>Ph), 3.95 – 3.78 (m, 1H, CH(CH<sub>3</sub>)<sub>2</sub>), 3.23 (m, 2H, CH<sub>2</sub>NBn), 3.16 – 2.95 (m, 6H, 3 x CH<sub>2</sub>), 2.67 (m, 2H, CH<sub>2</sub>NH<sub>2</sub>), 2.30 (m, 2H, NH<sub>2</sub>), 1.39 (m, 2H, CH<sub>2</sub>), 1.27 – 1.12 (m, 6H, 3 x CH<sub>2</sub>), 1.04 (d,  $J$  = 6.5 Hz, 6H, (CH<sub>3</sub>)<sub>2</sub>CH), 0.84 – 0.71 (m, 3H, CH<sub>3hexyl</sub>). **<sup>13</sup>C NMR** (101 MHz, CDCl<sub>3</sub>)  $\delta$  159.8 (C=O<sub>hexyl urea</sub>), 157.9

(C=O<sub>iPr urea</sub>), 138.4 (C<sub>Ar</sub>), 128.7 (2C, 2 x CH<sub>Ar</sub>), 127.3 (CH<sub>Ar</sub>), 127.2 (2C, 2 x CH<sub>Ar</sub>), 51.4 (CH<sub>2</sub>N), 51.1 (CH<sub>2</sub>Ph), 46.6 (CH<sub>2</sub>), 46.0 (CH<sub>2</sub>NBn), 42.7 (CH(CH<sub>3</sub>)<sub>2</sub>), 41.1 (CH<sub>2</sub>NH<sub>2</sub>), 40.8 (CH<sub>2</sub>N), 31.5 (CH<sub>2</sub>), 30.0 (CH<sub>2</sub>), 26.7 (CH<sub>2</sub>), 23.1 (2C, 2 x CH<sub>3iPr</sub>), 22.6 (CH<sub>2</sub>), 14.0 (CH<sub>3Hexyl</sub>). **FTIR (neat)**  $\nu_{\text{max}}$  = 3285, 2958, 2928, 2858, 1623, 1538, 1260 cm<sup>-1</sup>. **HR – MS** (ESI, positive ion mode) –  $m/z$  for [C<sub>22</sub>H<sub>39</sub>N<sub>5</sub>O<sub>2</sub>+H]<sup>+</sup> 406.3177, observed 406.3164.

### 1cc *N*-(phenylcarbamoyl)-*N*-benzyl-*N*'-(butylcarbamoyl)diethylenetriamine

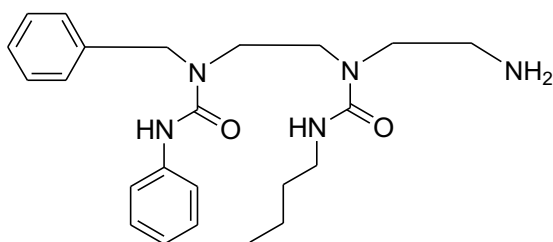

Following general procedure E, diurea **1cb** (170 mg, 0.33 mmol) in CH<sub>2</sub>Cl<sub>2</sub> (10 mL) and trifluoroacetic acid (0.75 mL) were stirred for 12 hours at 20 °C. Water then CH<sub>2</sub>Cl<sub>2</sub> were added, the organic layer was washed with aqueous NaHCO<sub>3</sub>, dried over Na<sub>2</sub>SO<sub>4</sub>, filtered and concentrated under reduced pressure. The residue was purified by flash chromatography on silica gel (eluent: CH<sub>2</sub>Cl<sub>2</sub> : MeOH 9:1) to give the unprotected amine (103 mg, 0.25 mmol, 76%). **<sup>1</sup>H NMR** (400 MHz, CDCl<sub>3</sub>)  $\delta$  7.98 (bs, NH<sub>3</sub><sup>+</sup>), 7.35 (d,  $J$  = 7.3 Hz, 2H, 2 x CH<sub>Ph</sub>), 7.32 – 7.16 (m, 7H, 7 x CH<sub>Ph</sub>), 6.99 (t,  $J$  = 7.2 Hz, 1H, CH<sub>Ph para</sub>), 6.80 (s, 1H, NH), 4.5 (s, 2H, CH<sub>2</sub>Ph), 3.71 – 3.38 (s, 4H, 2 x CH<sub>2</sub>), 3.37 – 3.25 (m, 2H, CH<sub>2</sub>), 3.23 – 3.07 (m, 2H, CH<sub>2</sub>), 3.05 – 2.78 (m, 2H, CH<sub>2</sub>), 1.53-1.40 (m, 2H, CH<sub>2Bu</sub>), 1.38 – 1.23 (m, 2H, CH<sub>2</sub>CH<sub>3</sub>), 0.86 (t,  $J$  = 7.1 Hz, 3H, CH<sub>3</sub>Bu). **<sup>13</sup>C NMR** (101 MHz, CDCl<sub>3</sub>)  $\delta$  156.6 (2C, 2 x C=O), 138.7 (C<sub>Bn</sub>), 136.5 (C<sub>Ph</sub>), 129.4 (2C, 2 x CH<sub>Ph ortho</sub>), 128.9 (2C, 2 x CH<sub>Bn</sub>), 128.3 (2C, 2 x CH<sub>Bn</sub>), 126.7 (CH<sub>Bn para</sub>), 123.5 (CH<sub>Ph para</sub>), 120.2 (2C, 2 x CH<sub>Ph meta</sub>), 52.5 (CH<sub>2</sub>Ph), 47.3 (CH<sub>2</sub>N), 46.3 (CH<sub>2</sub>N), 45.8 (CH<sub>2</sub>N), 41.1 (CH<sub>2</sub>N), 39.5 (CH<sub>2</sub>N), 31.6 (CH<sub>2</sub>), 20.1 (CH<sub>2</sub>), 13.8 (CH<sub>3</sub>). **HR – MS** (ESI, positive ion mode) –  $m/z$  for [C<sub>23</sub>H<sub>33</sub>N<sub>5</sub>O<sub>2</sub>+H]<sup>+</sup> 412.2707, observed 412.2690.

### 1b *N*-(isopropylcarbamoyl)-*N*-benzyl-*N*'-(hexylcarbamoyl)-*N*'-(3,5-bis(trifluoromethyl)phenylcarbamoyl)diethylenetriamine

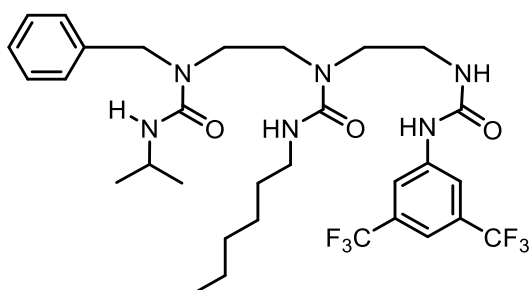

Following general procedure G using *N*-(isopropylcarbamoyl)-*N*-benzyl-*N*'-(hexylcarbamoyl)diethylenetriamine **1bc** (21 mg, 0.05 mmol) and 3,5-bis(trifluoromethyl)phenyl isocyanate (0.01 mL, 0.06 mmol), the title compound was obtained as a white solid (28 mg, 0.042 mmol, 84%). **<sup>1</sup>H NMR** (400 MHz, CDCl<sub>3</sub>)  $\delta$  8.82 (s, 1H, NHAr), 7.84 (s, 2H, CH<sub>Ar</sub>), 7.34 (s, 1H,



CH<sub>Ar</sub>), 7.24 (t, *J* = 7.5 Hz, 2H, 2x CH<sub>Ph</sub>), 7.16 (d, *J* = 7.5 Hz, 1H, CH<sub>Ph</sub>), 7.14 – 7.08 (m, 2H, 2 x CH<sub>Ph</sub>), 6.68 (s, 1H, NHCH<sub>2</sub>), 6.48 (s, 1H, NH<sub>Hexyl</sub>), 4.75 (m, 1 H, NH*i*Pr), 4.37 (s, 2H, CH<sub>2</sub>Ph), 3.92 – 3.73 (m, 1H, CH(CH<sub>3</sub>)<sub>2</sub>), 3.48 – 3.32 (m, 2H, CH<sub>2</sub>), 3.32 – 3.25 (m, 2H, CH<sub>2</sub>), 3.22 (m, 2H, CH<sub>2</sub>), 3.14 (m, 4H, 2 x CH<sub>2</sub>), 1.44 (dd, *J* = 7.4 Hz, 2H, CH<sub>2</sub>), 1.26 – 1.05 (m, 6H, 3 x CH<sub>2</sub>), 1.02 (d, *J* = 6.5 Hz, 6H, 2 x (CH<sub>3</sub>)<sub>2</sub>CH *i*Pr), 0.75 (t, *J* = 6.7 Hz, 3H, CH<sub>3hexyl</sub>). <sup>13</sup>C NMR (101 MHz, CDCl<sub>3</sub>) δ 159.1 (C=O<sub>Hexyl urea</sub>), 158.5 (C=O<sub>*i*Pr urea</sub>), 156.3 (C=O), 141.7 (C<sub>Ar</sub>), 137.1 (C<sub>Ph</sub>), 132.09 (q, *J* = 33.0 Hz, 2C, 2 x CCF<sub>3</sub>), 129.2 (2C, 2 x CH<sub>Ph</sub>), 128.0 (CH<sub>Ph</sub>), 126.4 (2C, 2 x CH<sub>Ph</sub>), 124.9 (q, *J* = 272.2 Hz, 2C, 2 x CF<sub>3</sub>), 117.9 (CH<sub>Ar</sub>), 114.9 (CH<sub>Ar</sub>), 52.2 (CH<sub>2</sub>Ph), 48.4 (CH<sub>2</sub>), 47.9 (CH<sub>2</sub>), 47.1 (CH<sub>2</sub>), 43.1 (CH<sub>*i*Pr</sub>), 41.5 (CH<sub>2</sub>), 39.3 (CH<sub>2</sub>), 31.6 (CH<sub>2</sub>), 29.8 (CH<sub>2</sub>), 26.8 (CH<sub>2</sub>), 23.2 (2C, 2 x CH<sub>3</sub>CH<sub>*i*Pr</sub>), 22.6 (CH<sub>2</sub>), 14.1 (CH<sub>3Hexyl</sub>). **FTIR (neat)** ν<sub>max</sub> = 3313, 2957, 2927, 2857, 1694, 1609, 1571, 1276, 1138 cm<sup>-1</sup>. **HR – MS** (ESI, positive ion mode) – *m/z* for [C<sub>31</sub>H<sub>42</sub>F<sub>6</sub>N<sub>6</sub>O<sub>3</sub>+H]<sup>+</sup> = 661.3295, observed 661.3298. **MP** 167-169 °C.

**1c** *N*-(phenylcarbamoyl)-*N*-benzyl-*N*'-(butylcarbamoyl)-*N*'-(3,5-bis(trifluoromethyl)phenylcarbamoyl)diethylenetriamine

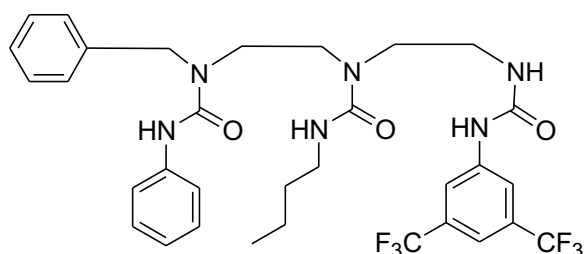

Following general procedure G, to a solution of primary amine **1cc** (100 mg, 0.24 mmol) in CH<sub>2</sub>Cl<sub>2</sub> (5 mL) was added dropwise at 20 °C 3,5-bis(trifluoromethyl)phenyl isocyanate (0.042 mL, 0.24 mmol), the mixture was stirred for 12 hours. Addition of water was followed with extraction of the aqueous layer using CH<sub>2</sub>Cl<sub>2</sub>. The organic layer was dried over Na<sub>2</sub>SO<sub>4</sub>, filtered and concentrated under reduced pressure. The residue was purified by flash chromatography on silica gel (eluent: CH<sub>2</sub>Cl<sub>2</sub> : MeOH 95:5) to afford the triurea **1c** (40 mg, 0.06 mmol, 25%) along with recovered starting material (40 mg, 40%). <sup>1</sup>H NMR (500 MHz, CDCl<sub>3</sub>) δ 8.39 (s, 1H, NHPh(CF<sub>3</sub>)<sub>2</sub>), 7.66 (s, 2H, 2 x CH<sub>Ph(CF<sub>3</sub>)<sub>2</sub></sub>), 7.57 – 7.40 (m, 2H, 2 x CH<sub>Ph ortho</sub>), 7.30 (s, 1H, CH<sub>Ph(CF<sub>3</sub>)<sub>2</sub></sub>), 7.25 (t, *J* = 7.6 Hz, 2H, 2 x CH<sub>Ph meta</sub>), 7.22 – 7.07 (m, 6H, 6 x CH<sub>Ar</sub>), 6.93 (t, *J* = 7.4 Hz, 1H, CH<sub>Ph para</sub>), 6.29 (s, 1H, NH), 5.88 (s, 1H, NHBu), 4.55 (s, 2H, CH<sub>2</sub>Ph), 3.45 – 3.29 (m, 2H, CH<sub>2</sub>N), 3.17 – 3.06 (m, 4H, 2 x CH<sub>2</sub>N), 3.05 – 2.95 (m, 2H, CH<sub>2</sub>N), 2.81 – 2.52 (m, 2H, CH<sub>2</sub>N), 1.35 - 1.26 (m, 2H, CH<sub>2</sub>), 1.20 – 1.12 (m, 2H, CH<sub>2</sub>), 0.68 (t, *J* = 7.4 Hz, 3H, CH<sub>3</sub>). <sup>13</sup>C NMR (126 MHz, CDCl<sub>3</sub>) δ 159.2 (C=O), 157.2 (C=O), 156.5 (C=O), 141.2 (C<sub>Ph(CF<sub>3</sub>)<sub>2</sub></sub>), 139.5 (C<sub>Ph</sub>), 137.5 (C<sub>Bn</sub>), 131.97 (q, *J* = 33.2 Hz, 2C, 2 x CCF<sub>3</sub>), 129.2 (2C, 2 x CH<sub>Bn</sub>), 129.0 (2C, 2 x CH<sub>Bn</sub>), 127.9 (1C, CH<sub>Bn para</sub>), 127.0 (2C, 2 x CH<sub>Ph</sub>), 123.4 (q, *J* = 272.6 Hz, 2C, 2 x CF<sub>3</sub>), 123.5 (CH<sub>Ph para</sub>), 120.7 (2C, 2 x CH<sub>Ph ortho</sub>), 117.9 (2C, 2 x CH<sub>Ph(CF<sub>3</sub>)<sub>2</sub></sub>), 115.1 (m, 1C, CH<sub>para Ph(CF<sub>3</sub>)<sub>2</sub></sub>), 51.6 (CH<sub>2</sub>Ph), 47.4 (CH<sub>2</sub>N), 47.2 (CH<sub>2</sub>N), 46.5 (CH<sub>2</sub>N), 41.0 (NHCH<sub>2</sub>), 38.6 (CH<sub>2</sub>N), 31.9 (CH<sub>2</sub>), 20.1 (CH<sub>2</sub>), 13.6 (CH<sub>3</sub>). **HR – MS** (ESI, positive ion mode) – *m/z* for [C<sub>32</sub>H<sub>36</sub>N<sub>6</sub>O<sub>3</sub>F<sub>6</sub>Na]<sup>+</sup> 689.2645, found 689.2617. **MP** 174-176 °C.

**Synthesis of triureas 1a, 1d, 1e, 3a-c**

**1aa** *N*-benzyl-*N*'-(*tert*butoxycarbonyl)diethylenetriamine

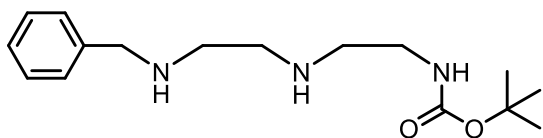

Following general procedure F with *N*-benzylethylenediamine (0.3 mL, 2 mmol), the title compound was obtained as an oil (233 mg, 1.2 mmol, 60%).  $^1\text{H NMR}$  (400 MHz,  $\text{CDCl}_3$ )  $\delta$  7.31 – 7.10 (m, 5H, 5 x  $\text{CH}_{\text{Ar}}$ ), 5.12 – 4.90 (s, 1H,  $\text{NHBoc}$ ), 3.78 – 3.65 (s, 2H,  $\text{CH}_2\text{Ph}$ ), 3.41 – 3.30 (s, 2H, 2 x  $\text{NH}$ ), 3.21 – 3.04 (dd,  $J = 5.9$  Hz, 2H,  $\text{CH}_2\text{N}$ ), 2.71 – 2.57 (m, 6H, 3 x  $\text{CH}_2\text{N}$ ), 1.48 – 1.27 (s, 9H,  $(\text{CH}_3)_3\text{C}$ ).  $^{13}\text{C NMR}$  (101 MHz,  $\text{CDCl}_3$ )  $\delta$  156.2 (C=O), 140.4 ( $\text{C}_{\text{Ar}}$ ), 128.5 (2C, 2 x  $\text{CH}_{\text{Ar}}$ ), 128.2 (2C, 2 x  $\text{CH}_{\text{Ar}}$ ), 127.0 ( $\text{CH}_{\text{Ar}}$ ), 79.2 ( $\text{C}(\text{CH}_3)_3$ ), 54.0 ( $\text{CH}_2\text{Ph}$ ), 50.4 ( $\text{CH}_2\text{N}$ ), 49.1 ( $\text{CH}_2\text{N}$ ), 49.0 ( $\text{CH}_2\text{N}$ ), 48.8 ( $\text{CH}_2\text{N}$ ), 28.5 (3C,  $(\text{CH}_3)_3\text{C}$ ). **FTIR (neat)**  $\nu_{\text{max}} = 3327, 2974, 2930, 2882, 1697, 1495, 1452, 1364, 1249, 1168$   $\text{cm}^{-1}$ . **HR – MS** (ESI, positive ion mode) –  $m/z$  for  $[\text{C}_{16}\text{H}_{27}\text{N}_3\text{O}_2+\text{H}]^+$  294.2176, observed 294.2168.

### 3aa *N*-ethyl-*N'*-(tert-butoxycarbonyl)diethylenetriamine

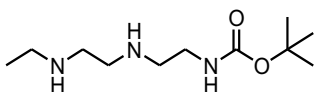

Following general procedure F with *N*-ethylethylenediamine (0.3 mL, 2 mmol), the carbamate was isolated as a colourless oil (268 mg, 1.16 mmol, 58%).  $^1\text{H NMR}$  (400 MHz,  $\text{CDCl}_3$ )  $\delta$  5.45 (s, 1H,  $\text{NH}$ ), 3.71 (dd,  $J = 7.0$  Hz, 2H,  $\text{NCH}_2$ ), 3.23 (m, 2H,  $\text{NCH}_2$ ), 3.00 – 2.91 (m, 4H, 2 x  $\text{NCH}_2$ ), 2.76 (t,  $J = 5.4$  Hz, 2H,  $\text{NCH}_2$ ), 1.44 (s, 9H,  $\text{C}(\text{CH}_3)_3$ ), 1.23 (t,  $J = 6.5$  Hz, 3H,  $\text{CH}_3$ ).  $^{13}\text{C NMR}$  (101 MHz,  $\text{CDCl}_3$ )  $\delta$  156.9 (C=O), 81.4 ( $\text{C}(\text{CH}_3)_3$ ), 58.4 ( $\text{NCH}_2$ ), 49.1 ( $\text{NCH}_2$ ), 47.1 ( $\text{NCH}_2$ ), 46.0 ( $\text{NCH}_2$ ), 40.1 ( $\text{NCH}_2$ ), 28.5 (3C,  $\text{C}(\text{CH}_3)_3$ ), 18.4 ( $\text{CH}_3$ ). **FTIR (neat)**  $\nu_{\text{max}} = 3396, 2977, 2969, 1696$ . **HR-MS** (ESI, positive ion mode) –  $m/z$  for  $[\text{C}_{11}\text{H}_{25}\text{N}_3\text{O}_2+\text{H}]^+$  232.2025, observed 232.2019.

### 1ab *N,N''*-bis(hexylcarbamoyl)-*N*-benzyl-*N'*-(tert-butoxycarbonyl)diethylenetriamine

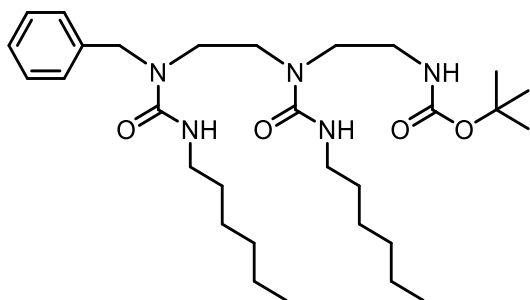

Following general procedure D with *N*-benzyl-*N'*-(tert-butoxycarbonyl)diethylenetriamine **1aa** (233 mg, 0.8 mmol) and hexyl isocyanate (0.34 mL, 2.38 mmol, 3 equiv.), the title compound (400 mg, 0.744 mmol, 93%) was obtained as a colourless oil after silica gel flash chromatography (eluent:  $\text{CH}_2\text{Cl}_2:\text{MeOH}$  98:2).  $^1\text{H NMR}$  (400 MHz,  $\text{CDCl}_3$ )  $\delta$  7.28 – 7.22 (m, 2H, 2 x  $\text{CH}_{\text{Ar}}$ ), 7.21 – 7.17 (m, 1H,  $\text{CH}_{\text{Ar}}$ ), 7.17 – 7.11 (m, 2H, 2 x  $\text{CH}_{\text{Ar}}$ ), 6.16 (s, 1H,  $\text{NH}$ ), 5.38 (s, 1H,  $\text{NH}$ ), 5.24 (m, 1H,  $\text{NH}$ ), 4.38 (s, 2H,  $\text{CH}_2\text{Ph}$ ), 3.27 (dd,  $J = 9.5, 5.5$  Hz, 2H,  $\text{CH}_2$ ), 3.21 – 3.07 (m, 8H, 4 x  $\text{CH}_2$ ), 3.06 – 2.97 (m, 2H,  $\text{CH}_3$ ), 1.51 – 1.31 (m, 4H, 2 x  $\text{CH}_2$ ), 1.34 (s, 9H,  $(\text{CH}_3)_3\text{C}$ ), 1.30 – 1.07 (m, 12H, 6 x  $\text{CH}_2$ ), 0.86 – 0.72 (m, 6H, 2 x  $\text{CH}_3$ ).  $^{13}\text{C NMR}$  (101 MHz,  $\text{CDCl}_3$ )  $\delta$  158.7 (2 x C=O), 156.7 (C=O), 138.1 ( $\text{C}_{\text{Bn}}$ ), 128.8 (2C, 2 x  $\text{CH}_{\text{Bn}}$ ), 127.5 ( $\text{CH}_{\text{Bn}}$ ), 127.0 (2C, 2 x  $\text{CH}_{\text{Bn}}$ ), 79.6 ( $\text{C}(\text{CH}_3)_3$ ), 51.6 ( $\text{CH}_2\text{Ph}$ ), 47.5 ( $\text{CH}_2\text{N}$ ), 46.8 (2C, 2 x  $\text{CH}_2\text{N}$ ), 41.0 (2C, 2 x  $\text{CH}_2$ ), 39.9 ( $\text{CH}_2\text{NHBoc}$ ), 31.6 (2C, 2 x  $\text{CH}_2$ ), 29.9 (2C, 2 x  $\text{CH}_2$ ), 28.4 (3C,  $(\text{CH}_3)_3\text{C}$ ), 26.7 – 26.6 (2C, 2 x  $\text{CH}_2$ ), 22.6 (2C, 2 x  $\text{CH}_2$ ), 14.1 – 14.0 (2C, 2 x  $\text{CH}_3$ ). **FTIR (neat)**  $\nu_{\text{max}} = 3301, 2956$ .

2928, 2858, 1689, 1626, 1536, 1219  $\text{cm}^{-1}$ . **HR – MS** (ESI, positive ion mode) –  $m/z$  for  $[\text{C}_{30}\text{H}_{53}\text{N}_5\text{O}_4+\text{H}]^+$  548.4170, observed 548.4155.

**1db *N*-(phenylcarbamoyl)-*N*-benzyl-*N'*-(tert-butoxycarbonyl)-*N''*-(phenylcarbamoyl)diethylenetriamine**

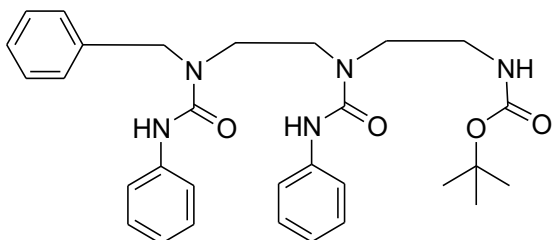

Following general procedure D with the *N*-benzyl-*N'*-(tert-butoxycarbonyl)diethylenetriamine **1aa** (187 mg, 0.45 mmol) in  $\text{CH}_2\text{Cl}_2$  (3 mL) and phenyl isocyanate (0.13 mL, 1.2 mmol), the product was obtained after purification by silica gel flash chromatography ( $\text{CH}_2\text{Cl}_2$ :MeOH 9:1) (72 mg, 0.14 mmol, 30%).  **$^1\text{H}$  NMR** (400 MHz,  $\text{CDCl}_3$ )  $\delta$  8.50 (s, 1H, *NHPh*), 7.57 (d,  $J = 8.0$  Hz, 2H, 2 x  $\text{CH}_{\text{Ph1ortho}}$ ), 7.50 (d,  $J = 7.2$  Hz, 2H, 2 x  $\text{CH}_{\text{Ph2ortho}}$ ), 7.27 – 7.14 (m, 10H, *NHPh*, 4 x  $\text{CH}_{\text{Phmeta}}$ , 5 x  $\text{CH}_{\text{Bn}}$ ), 6.95 – 6.88 (m, 2H, 2 x  $\text{CH}_{\text{Phpara}}$ ), 5.14 (s, 1H, *NHBoc*), 4.52 (s, 2H,  $\text{CH}_2\text{Ph}$ ), 3.40 (dd,  $J = 9.6, 5.9$  Hz, 2H,  $\text{CH}_2\text{NBn}$ ), 3.23 (q,  $J = 8.1, 6.9$  Hz, 4H, 2 x  $\text{CH}_2\text{N}$ ), 3.05 (t,  $J = 7.3$  Hz, 2H,  $\text{CH}_2\text{NH}$ ), 1.35 (s, 9H,  $(\text{CH}_3)_3\text{C}$ ).  **$^{13}\text{C}$  NMR** (101 MHz,  $\text{CDCl}_3$ )  $\delta$  157.2 (C=O), 156.3 (C=O), 156.2 (C=O), 139.9 (2C, 2 x  $\text{C}_{\text{Ph}}$ ), 138.0 (1C,  $\text{C}_{\text{Bn}}$ ), 129.0 (2C, 2 x  $\text{CH}_{\text{Ph}}$ ), 128.8 (2C, 2 x  $\text{CH}_{\text{Ph}}$ ), 128.7 (2C, 2 x  $\text{CH}_{\text{Ph}}$ ), 127.8 (1C,  $\text{CH}_{\text{Bnpara}}$ ), 127.5 (2C, 2 x  $\text{CH}_{\text{Ph}}$ ), 122.7 (2C, 2 x  $\text{CH}_{\text{Ph1-2 para}}$ ), 119.9 (2C, 2 x  $\text{CH}_{\text{Ph2ortho}}$ ), 119.7 (2C, 2 x  $\text{CH}_{\text{Ph1ortho}}$ ), 80.4 (1C,  $\text{C}(\text{CH}_3)_3$ ), 51.5 (1C,  $\text{CH}_2\text{Ph}$ ), 47.8 (1C,  $\text{CH}_2\text{NBn}$ ), 46.2 (2C, 2 x  $\text{CH}_2\text{N}$ ), 40.1 (1C,  $\text{CH}_2\text{NH}$ ), 28.4 (3C,  $(\text{CH}_3)_3\text{C}$ ). **HR – MS** (ESI, positive ion mode) –  $m/z$  for  $[\text{C}_{30}\text{H}_{37}\text{N}_5\text{O}_4\text{Na}]^+$  554.2738, observed 554.2720.

**1eb *N,N''*-bis(4-butoxyphenylcarbamoyl)-*N*-benzyl-*N'*-(tert-butoxycarbonyl)diethylenetriamine**

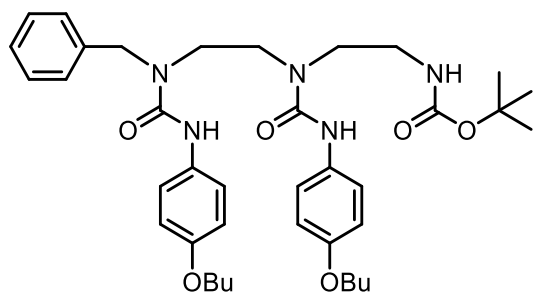

Following general procedure D with *N*-benzyl-*N'*-(tert-butoxycarbonyl)diethylenetriamine **1aa** (60 mg, 0.2 mmol) and para-*n*-butoxyphenyl isocyanate (0.11 mL, 0.6 mmol, 3 equiv.), the title compound was obtained as a white solid after the residue was purified by silica gel flash chromatography (eluent:  $\text{CH}_2\text{Cl}_2$ :MeOH 95:5) (130 mg, 0.194 mmol, 97%).  **$^1\text{H}$  NMR** (500 MHz,  $\text{CDCl}_3$ )  $\delta$  8.53 – 8.32 (m, 1H, *NH*), 7.57 – 7.50 (m, 2H, 2 x  $\text{CH}_{\text{Ar}}$ ), 7.42 (d,  $J = 8.1$  Hz, 2H, 2 x  $\text{CH}_{\text{Ar}}$ ), 7.40 – 7.35 (m, 2H, 2 x  $\text{CH}_{\text{Ar}}$ ), 7.35 – 7.29 (m, 3H, 3 x  $\text{CH}_{\text{Ar}}$ ), 6.88 – 6.79 (m, 4H, 4 x  $\text{CH}_{\text{Ar}}$ ), 5.06 (s, 1H, *NH*), 4.63 (s, 2H,  $\text{CH}_2\text{Ph}$ ), 3.99 – 3.91 (m, 4H, 2 x  $\text{CH}_2\text{O}$ ), 3.53 (t,  $J = 7.6$  Hz, 2H,  $\text{CH}_2\text{N}$ ), 3.41 – 3.32 (m, 4H, 2 x  $\text{CH}_2\text{N}$ ), 3.19 (dd,  $J = 6.8$  Hz, 2H,  $\text{CH}_2\text{N}$ ), 1.82 – 1.71 (m, 4H, 2 x  $\text{CH}_2$ ), 1.55 – 1.47 (m, 4H, 2 x  $\text{CH}_2$ ), 1.46 (s, 9H,  $(\text{CH}_3)_3\text{C}$ ), 1.02 – 0.95 (m, 6H, 2 x  $\text{CH}_3$ ).  **$^{13}\text{C}$  NMR** (126 MHz,  $\text{CDCl}_3$ )  $\delta$  157.1 (C=O), 156.5 (C=O), 156.5 (C=O), 155.1 ( $\text{C}_{\text{Ar}}$ ), 155.0 ( $\text{C}_{\text{Ar}}$ ), 138.1 ( $\text{C}_{\text{Bn}}$ ), 133.0 ( $\text{C}_{\text{Ar}}$ ), 132.8 ( $\text{C}_{\text{Ar}}$ ), 127.8 (2C, 2 x  $\text{CH}_{\text{Bn}}$ ), 127.5 ( $\text{CH}_{\text{Bn}}$ ), 121.7 (2C, 2 x  $\text{CH}_{\text{Bn}}$ ), 121.3 (2C, 2 x  $\text{CH}_{\text{Ar}}$ ), 114.8 (2C, 2 x  $\text{CH}_{\text{Ar}}$ ), 114.8 (4C, 4 x  $\text{CH}_{\text{Ar}}$ ), 80.5 ( $\text{C}(\text{CH}_3)_3$ ), 68.1 (2C, 2 x  $\text{CH}_2$ ), 51.7 ( $\text{CH}_2\text{Ph}$ ), 47.9 ( $\text{CH}_2\text{N}$ ), 47.7 ( $\text{CH}_2\text{N}$ ), 46.6 ( $\text{CH}_2\text{N}$ ), 40.2 ( $\text{CH}_2\text{NNBoc}$ ), 31.5 (2C, 2 x  $\text{CH}_2$ ), 28.5 (3C,  $(\text{CH}_3)_3\text{C}$ ), 19.4

(2C, 2 x CH<sub>2</sub>), 14.0 (2C, 2 x CH<sub>3</sub>). **FTIR (neat)**  $\nu_{\text{max}}$  = 3292, 2957, 2931, 1643, 1510, 1220 cm<sup>-1</sup>. **HR – MS** (ESI, positive ion mode) –  $m/z$  for [C<sub>38</sub>H<sub>53</sub>N<sub>5</sub>O<sub>6</sub>+H]<sup>+</sup> 676.4069, observed 676.4057. **MP** 81-83 °C.

**3ab N-ethyl-N,N''-bis(phenylcarbamoyl)-N'-(tertbutoxycarbonyl)diethylenetriamine**

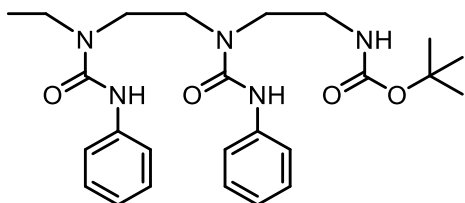

Following general procedure D with *N*-ethyl-*N'*-(*tert*butoxycarbonyl)diethylenetriamine **1aa** (200 mg, 0.87 mmol) and phenyl isocyanate (0.28 mL, 2.5 mmol, 3 equiv.) (the mixture was stirred at 80 °C for 16 hours), the residue was purified using silica gel flash chromatography (CH<sub>2</sub>Cl<sub>2</sub>:MeOH 95:5) to afford the title compound as a white solid (200 mg, 0.42 mmol, 50%). **<sup>1</sup>H NMR** (400 MHz, CDCl<sub>3</sub>)  $\delta$  8.82 – 8.52 (s, 1H, NH), 8.15– 7.84 (s, 1H, NH), 7.75 – 7.65 (d,  $J$  = 8.0 Hz, 2H, 2 x CH<sub>Ar</sub>), 7.65 – 7.53 (d,  $J$  = 8.0 Hz, 2H, 2 x CH<sub>Ar</sub>), 7.38 – 7.21 (m, 4H, 4 x CH<sub>Ar</sub>), 7.09 – 6.97 (m, 2H, 2 x CH<sub>Ar</sub>), 5.18 (t,  $J$  = 5.6 Hz, 1H, NH), 3.54 – 3.37 (m, 8H, 4 x CH<sub>2</sub>), 3.27 (dd,  $J$  = 6.9, 6.6 Hz, 2H, CH<sub>2</sub>NH), 1.49 (s, 9H, (CH<sub>3</sub>)<sub>3</sub>C), 1.27 – 1.17 (t,  $J$  = 7.1 Hz, 3H, CH<sub>3</sub>CH<sub>2</sub>). **<sup>13</sup>C NMR** (101 MHz, CDCl<sub>3</sub>)  $\delta$  157.2 (C=O<sub>Boc</sub>), 156.3 (C=O), 155.7 (C=O), 140.0 (C<sub>Ar</sub>), 139.2 (C<sub>Ar</sub>), 128.8 (2C, 2 x CH<sub>Ar</sub>), 128.8 (2C, 2 x CH<sub>Ar</sub>), 122.7 (2C, 2 x CH<sub>Ar</sub>), 119.9 (2C, 2 x CH<sub>Ar</sub>), 119.7 (2C, 2 x CH<sub>Ar</sub>), 80.5 (C(CH<sub>3</sub>)<sub>3</sub>), 47.9 (2C, 2 x CH<sub>2</sub>), 46.1 (CH<sub>2</sub>), 43.2 (CH<sub>2</sub>), 40.3 (CH<sub>2</sub>), 28.5 (3C, (CH<sub>3</sub>)<sub>3</sub>C), 14.3 (CH<sub>3</sub>). **FTIR (neat)**  $\nu_{\text{max}}$  = 3311, 3137, 1710, 1664 cm<sup>-1</sup>. **HR – MS** (ESI, positive ion mode) –  $m/z$  for [C<sub>25</sub>H<sub>35</sub>N<sub>5</sub>O<sub>4</sub>+Na]<sup>+</sup> = 492.2581, observed 492.2588. **MP** 130-131 °C.

**1ac N,N''-bis(hexylcarbamoyl)-N-benzylidiethylenetriamine, trifluoroacetic salt**

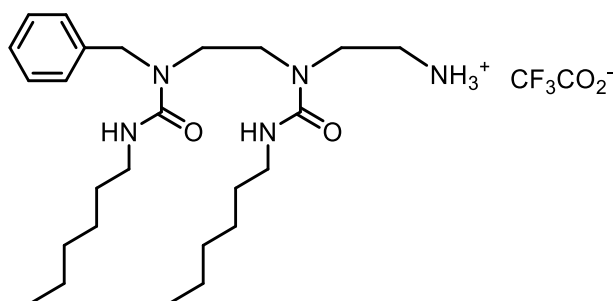

Following general procedure E, *N,N''*-bis(hexylcarbamoyl)-*N*-benzyl-*N'*-(*tert*butoxycarbonyl)diethylenetriamine **1ab** (400 mg, 0.73 mmol) afforded the title compound (325 mg, 0.73 mmol, quantitative yield) as an oil. **<sup>1</sup>H NMR** (500 MHz, CDCl<sub>3</sub>)  $\delta$  9.98 (s, 2H, NH), 8.17 (d,  $J$  = 6.0 Hz, 3H, NH<sub>3</sub>), 7.38 (dd,  $J$  = 8.1, 6.7 Hz, 2H, 2 x CH<sub>Ph</sub>), 7.33 – 7.22 (m, 1H, CH<sub>Ph</sub>), 7.20 (dd,  $J$  = 7.1, 1.8 Hz, 2H, 2 x CH<sub>Ph</sub>), 6.93 (s, 1H, NH), 4.62 (m, 1H, NH), 4.42 (s, 2H, CH<sub>2</sub>Ph), 3.59 – 3.39 (m, 4H, 2 x CH<sub>2</sub>N), 3.36 (dd,  $J$  = 9.3, 5.7 Hz, 2H, CH<sub>2</sub>NBn), 3.23 – 2.95 (m, 6H, 3 x CH<sub>2</sub>NH), 1.64 – 1.43 (m, 2H, CH<sub>2</sub>), 1.43 – 1.05 (m, 14H, 7 x CH<sub>2</sub>), 0.88 (6H, 2 x CH<sub>3</sub>). **<sup>13</sup>C NMR** (126 MHz, CDCl<sub>3</sub>)  $\delta$  161.0 (q,  $J$  = 38.2 Hz, C=OCF<sub>3</sub>), 159.8 (C=O), 159.0 (C=O), 136.5 (C<sub>Ar</sub>), 129.3 (2C, 2 x CH<sub>Ar</sub>), 128.1 (CH<sub>Ar</sub>), 126.4 (2C, 2 x CH<sub>Ar</sub>), 115.8 (q,  $J$  = 288.8 Hz, CF<sub>3</sub>), 52.3 (CH<sub>2</sub>Ph), 47.4 (CH<sub>2</sub>N), 46.5 (CH<sub>2</sub>N), 46.3 (CH<sub>2</sub>N), 41.5 (CH<sub>2</sub>NH), 42.0 (CH<sub>2</sub>NH), 39.8 (CH<sub>2</sub>NH<sub>2</sub>), 31.5 (CH<sub>2</sub>), 31.4 (CH<sub>2</sub>), 29.7 (CH<sub>2</sub>), 29.5 (CH<sub>2</sub>), 26.6 (CH<sub>2</sub>), 26.3 (CH<sub>2</sub>), 22.4 (2C, 2 x CH<sub>2</sub>), 13.9 (2C, 2 x CH<sub>3</sub>). **FTIR (neat)**  $\nu_{\text{max}}$  = 2956, 2929, 2858, 1678, 1627, 1538, 1201, 1174 cm<sup>-1</sup>. **HR – MS** (ESI, positive ion mode) –  $m/z$  for [C<sub>25</sub>H<sub>46</sub>N<sub>5</sub>O<sub>2</sub>]<sup>+</sup> 448.3646, observed 448.3629.

### 1dc *N*-(phenylcarbamoyl)-*N*-benzyl-*N*'-(phenylcarbamoyl)diethylenetriamine

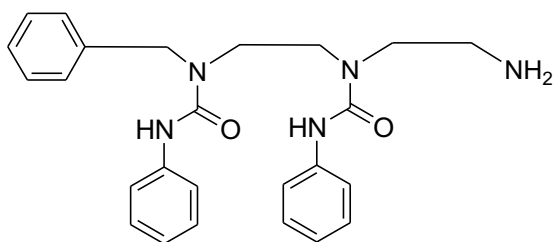

Following general procedure E, diurea **1db** (72 mg, 0.13 mmol) in  $\text{CH}_2\text{Cl}_2$  (5 mL) and trifluoroacetic acid (0.35 mL) was stirred for 12 hours at 20 °C. Water then  $\text{CH}_2\text{Cl}_2$  were added, the organic layer was washed with aqueous  $\text{NaHCO}_3$ , dried over  $\text{Na}_2\text{SO}_4$ , filtered and concentrated under reduced pressure. The residue was purified by flash chromatography on silica gel (eluent:  $\text{CH}_2\text{Cl}_2$ :MeOH 9:1) to give the unprotected amine (50 mg, 0.11 mmol, 86%).  $^1\text{H NMR}$  (400 MHz,  $\text{CDCl}_3$ )  $\delta$  8.88 (s, 1H, NH), 8.09 – 7.57 (m, 2H, 2 x  $\text{CH}_{\text{Ph}}$ ), 7.53 – 7.33 (m, 2H, 2 x  $\text{CH}_{\text{Ph}}$ ), 7.31 – 7.01 (m, 9H, 9 x  $\text{CH}_{\text{Ph}}$ ), 6.92 – 6.80 (m, 2H, 2 x  $\text{CH}_{\text{Ph para}}$ ), 6.70 (s, 1H, NH), 4.35 (s, 2H,  $\text{CH}_2\text{Ph}$ ), 3.29 (s, 4H, 2 x  $\text{CH}_2\text{N}$ ), 3.17 (s, 2H,  $\text{CH}_2\text{N}$ ), 2.81 (s, 2H,  $\text{CH}_2\text{N}$ ).  $^{13}\text{C NMR}$  (101 MHz,  $\text{CDCl}_3$ )  $\delta$  156.6 (2C, 2 x C=O), 139.3 ( $\text{C}_{\text{Ph}}$ ), 138.6 ( $\text{C}_{\text{Ph}}$ ), 136.3 ( $\text{C}_{\text{Ph}}$ ), 129.4 (2C, 2 x  $\text{CH}_{\text{Ph}}$ ), 129.0 (2C, 2 x  $\text{CH}_{\text{Ph}}$ ), 128.9 (2C, 2 x  $\text{CH}_{\text{Ph}}$ ), 128.4 ( $\text{CH}_{\text{Bn para}}$ ), 126.7 (2C, 2 x  $\text{CH}_{\text{Ph}}$ ), 123.6 ( $\text{CH}_{\text{Ph para}}$ ), 123.5 ( $\text{CH}_{\text{Ph para}}$ ), 121.0 (2C, 2 x  $\text{CH}_{\text{Ph}}$ ), 120.2 (2C, 2 x  $\text{CH}_{\text{Ph}}$ ), 52.6 ( $\text{CH}_2\text{Ph}$ ), 47.7 ( $\text{CH}_2\text{N}$ ), 46.0 ( $\text{CH}_2\text{N}$ ), 45.9 ( $\text{CH}_2\text{N}$ ), 39.4 ( $\text{CH}_2\text{N}$ ). **HR – MS** (ESI, positive ion mode) –  $m/z$  for  $[\text{C}_{25}\text{H}_{29}\text{N}_5\text{O}_2+\text{H}]^+$  432.2394, observed 432.2379.

### 1ec *N,N''*-bis(4-butoxyphenylcarbamoyl)-*N*-benzyl-diethylenetriamine, trifluoroacetic salt

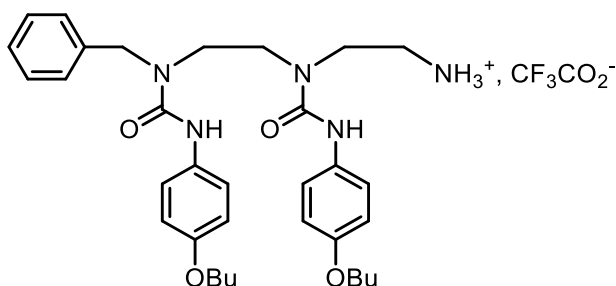

Following general procedure E, *N,N''*-bis(4-butoxyphenylcarbamoyl)-*N*-benzyl-*N'*-(*tert*butoxycarbonyl)diethylenetriamine **1eb** (96 mg, 0.14 mmol) afforded the title compound (70 mg, 0.122 mmol, 87%) as a white solid.  $^1\text{H NMR}$  (500 MHz,  $\text{CDCl}_3$ )  $\delta$  8.84 (s, 1H, NH), 7.96 (s, 3H,  $\text{NH}_3^+$ ), 7.44 – 7.33 (m, 4H, 4 x  $\text{CH}_{\text{Ar}}$ ), 7.30 (m, 1H,  $\text{CH}_{\text{Ar}}$ ), 7.23 (d,  $J = 7.5$  Hz, 2H, 2 x  $\text{CH}_{\text{Ar}}$ ), 7.18 – 7.01 (m, 2H, 2  $\text{CH}_{\text{Ar}}$ ), 6.92 – 6.57 (m, 4H, 4  $\text{CH}_{\text{Ar}}$ ), 4.58 (s, 1H, NH), 4.47 (s, 2H,  $\text{CH}_2\text{Ph}$ ), 3.87 (t,  $J = 6.5$  Hz, 2H,  $\text{CH}_2\text{O}$ ), 3.83 (t,  $J = 6.6$  Hz, 2H,  $\text{CH}_2\text{O}$ ), 3.60 – 3.16 (m, 8H, 4 x  $\text{CH}_2$ ), 3.06 – 2.66 (m, 2H,  $\text{CH}_2$ ), 1.77 – 1.70 (m, 2H,  $\text{CH}_2$ ), 1.67 (m, 2H,  $\text{CH}_2$ ), 1.51 – 1.36 (m, 4H, 2 x  $\text{CH}_2$ ), 0.97 (t,  $J = 7.4$  Hz, 3H,  $\text{CH}_3$ ), 0.93 (t,  $J = 7.4$  Hz, 3H,  $\text{CH}_3$ ).  $^{13}\text{C NMR}$  (126 MHz,  $\text{CDCl}_3$ )  $\delta$  162.2 (q,  $J = 36.1$  Hz, C=OCF<sub>3</sub>), 157.5 (C=O), 156.9 (C=O), 155.6 (2 x  $\text{C}_{\text{Ar}}$ ), 136.5 ( $\text{C}_{\text{Bn}}$ ), 131.9 ( $\text{C}_{\text{Ar}}$ ), 131.4 ( $\text{C}_{\text{Ar}}$ ), 129.3 (2C, 2 x  $\text{CH}_{\text{Bn}}$ ), 128.2 ( $\text{CH}_{\text{Bn}}$ ), 126.7 (2C, 2 x  $\text{CH}_{\text{Bn}}$ ), 122.9 (2C, 2 x  $\text{CH}_{\text{Ar}}$ ), 122.3 (2C, 2 x  $\text{CH}_{\text{Ar}}$ ), 116.4 (q,  $J = 290.8$  Hz,  $\text{CF}_3$ ), 114.7 (2C, 2 x  $\text{CH}_{\text{Ar}}$ ), 114.6 (2C, 2 x  $\text{CH}_{\text{Ar}}$ ), 68.0 (2C, 2 x  $\text{CH}_2$ ), 52.5 ( $\text{CH}_2\text{Ph}$ ), 50.4 ( $\text{CH}_2\text{N}$ ), 47.5 ( $\text{CH}_2\text{N}$ ), 46.1 ( $\text{CH}_2\text{N}$ ), 45.7 ( $\text{CH}_2\text{N}$ ), 39.1 ( $\text{CH}_3\text{NBn}$ ), 31.4 (2C, 2 x  $\text{CH}_2$ ), 19.3 (2C, 2 x  $\text{CH}_2$ ), 13.9 (2C, 2 x  $\text{CH}_3$ ). **FTIR (neat)**  $\nu_{\text{max}} = 3320, 2959, 2930, 2872, 1644, 1509, 1219$   $\text{cm}^{-1}$ . **HR – MS** (ESI, positive ion mode) –  $m/z$  for  $[\text{C}_{33}\text{H}_{46}\text{N}_5\text{O}_4]^+$  576.3544, observed 576.3529. **MP** 64-65 °C.

**3ac *N,N''*-bis(phenylcarbamoyl)-*N*-ethyldiethylenetriamine, trifluoroacetic salt**

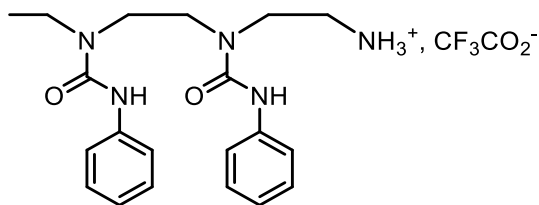

Following general procedure E, *N,N''*-bis(phenylcarbamoyl)-*N*-ethyl-*N'*-(*tert*butoxycarbonyl)diethylenetriamine **3ab** (18 mg, 0.038 mmol) afforded the product (20 mg, quant) as a white solid.  $^1\text{H NMR}$  (400 MHz,  $\text{CDCl}_3$ )  $\delta$  9.18 (s, 1H, NH), 7.45–7.33 (m, 4H, 4 x  $\text{CH}_{\text{Ph}}$ ), 7.21 – 7.09 (m, 4H, 4 x  $\text{CH}_{\text{Ph}}$ ), 6.95 – 6.84 (m, 2H, 4 x  $\text{CH}_{\text{Phpara}}$ ), 5.88 (bs, 3H,  $\text{NH}_3^+$ ), 3.41 – 3.31 (m, 2H,  $\text{CH}_2$ ), 3.31 – 3.13 (m, 6H, 6 x  $\text{CH}_2$ ), 2.91 – 2.80 (m, 2H,  $\text{CH}_2$ ), 1.05 (t,  $J = 7.1$  Hz, 3H).  $^{13}\text{C NMR}$  (101 MHz,  $\text{CDCl}_3$ )  $\delta$  157.5 (C=O), 155.9 (C=O), 139.7 ( $\text{C}_{\text{Ph}}$ ), 139.3 ( $\text{C}_{\text{Ph}}$ ), 128.9 (2 x  $\text{CH}_{\text{Ph}}$ ), 128.8 (2 x  $\text{CH}_{\text{Ph}}$ ), 123.0 ( $\text{CH}_{\text{Ph}}$ ), 123.0 ( $\text{CH}_{\text{Ph}}$ ), 120.3 ((2 x  $\text{CH}_{\text{Ph}}$ )), 120.2 (2 x  $\text{CH}_{\text{Ph}}$ ), 47.8 ( $\text{CH}_2$ ), 46.9 ( $\text{CH}_2$ ), 46.1 ( $\text{CH}_2$ ), 43.4 ( $\text{CH}_2$ ), 39.8 ( $\text{CH}_2$ ), 14.1 ( $\text{CH}_3$ ).

**1a *N,N''*-bis(hexylcarbamoyl)-*N*-benzyl-*N'*-(3,5-bis(trifluoromethyl)phenylcarbamoyl)diethylenetriamine**

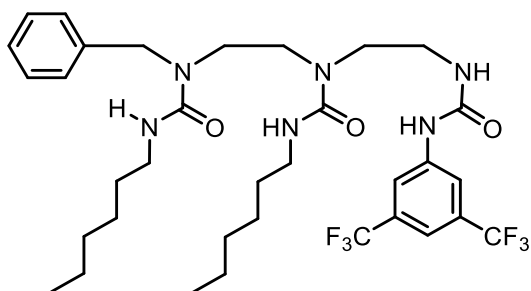

Following general procedure G with *N,N''*-bis(hexylcarbamoyl)-*N*-benzyl diethylenetriamine **1ac** (23 mg, 0.06 mmol) and 3,5-bis(trifluoromethyl)phenyl isocyanate (0.011 mL, 0.06 mmol), the title urea was obtained as a white solid (40 mg, 0.058 mmol, 97%).  $^1\text{H NMR}$  (500 MHz,  $\text{CD}_2\text{Cl}_2$ )  $\delta$  9.11 (s, 1H,  $\text{NH}_{\text{Ar}}$ ), 7.95 (s, 2H,  $\text{CH}_{\text{Ar}}$ ), 7.42 (s, 1H,  $\text{CH}_{\text{Ar}}$ ), 7.29 (m, 2H, 2 x  $\text{CH}_{\text{Ph}}$ ), 7.24 – 7.19 (m, 2H, 2 x  $\text{CH}_{\text{Ph}}$ ), 7.18 (d,  $J = 7.6$  Hz, 1H,  $\text{CH}_{\text{Ph}}$ ), 6.83 – 6.17 (m, 2H, 2 x  $\text{NH}$ ), 4.48 (s, 2H,  $\text{CH}_2\text{Ph}$ ), 3.41 – 3.34 (m, 2H,  $\text{CH}_2\text{NBn}$ ), 3.29 (m, 2H,  $\text{CH}_2\text{N}$ ), 3.25 – 3.135 (m, 6H, 3 x  $\text{CH}_2$ ), 3.09 (m, 2H,  $\text{CH}_2\text{NH}$ ), 1.49 (m, 4H, 2 x  $\text{CH}_2$ ), 1.33 – 1.12 (m, 12H, 6 x  $\text{CH}_2$ ), 0.83 (m, 6H, 2 x  $\text{CH}_3_{\text{hexyl}}$ ).  $^{13}\text{C NMR}$  (126 MHz,  $\text{CD}_2\text{Cl}_2$ )  $\delta$  159.6 (C=O<sub>urea</sub>), 159.6 (C=O<sub>urea</sub>), 156.7 (C=O<sub>Ar</sub> urea), 142.5 ( $\text{C}_{\text{Ar}}$ ), 138.4 ( $\text{C}_{\text{Ph}}$ ), 132.3 (q,  $J = 33.0$  Hz, 2C, 2 x  $\text{C}_{\text{Ar}}\text{CF}_3$ ), 129.5 (2C, 2 x  $\text{CH}_{\text{Ph}}$ ), 128.1 ( $\text{CH}_{\text{Ph}}$ ), 127.0 (2C, 2 x  $\text{CH}_{\text{Ph}}$ ), 124.1 (q,  $J = 272.5$  Hz, 2C, 2 x  $\text{CF}_3$ ), 118.2 (2C, 2 x  $\text{CH}_{\text{Ar}}$ ), 115.0 ( $\text{CH}_{\text{Ar}}$ ), 52.5 ( $\text{CH}_2\text{Ph}$ ), 48.4 ( $\text{CH}_2\text{N}$ ), 48.0 ( $\text{CH}_2\text{NBn}$ ), 47.6 ( $\text{CH}_2\text{N}$ ), 41.8 ( $\text{CH}_2_{\text{hexyl}}\text{NH}$ ), 41.7 ( $\text{CH}_2_{\text{hexyl}}\text{NH}$ ), 39.8 ( $\text{CH}_2\text{NH}$ ), 32.1 ( $\text{CH}_2_{\text{Hexyl}}$ ), 32.1 ( $\text{CH}_2_{\text{Hexyl}}$ ), 30.4 ( $\text{CH}_2_{\text{Hexyl}}$ ), 30.3 ( $\text{CH}_2_{\text{Hexyl}}$ ), 27.2 ( $\text{CH}_2_{\text{Hexyl}}$ ), 27.1 ( $\text{CH}_2_{\text{Hexyl}}$ ), 23.1 (2C, 2 x  $\text{CH}_2_{\text{Hexyl}}$ ), 14.3 (2C, 2 x  $\text{CH}_3_{\text{Hexyl}}$ ). **FTIR (neat)**  $\nu_{\text{max}} = 3312, 3088, 2958, 2930, 2866, 1692, 1611, 1572, 1387, 1276, 1137$   $\text{cm}^{-1}$ . **HR – MS** (ESI, positive ion mode) –  $m/z$  for  $[\text{C}_{34}\text{H}_{48}\text{F}_6\text{N}_6\text{O}_3+\text{H}]^+$  703.3765, observed 703.3747 ;  $m/z$  for  $[\text{C}_{34}\text{H}_{48}\text{F}_6\text{N}_6\text{O}_3+\text{Na}]^+$  725.3584, observed 725.3561. **MP** 137–139 °C.

**1d*****N*-(phenylcarbamoyl)-*N*-benzyl-*N*'-(phenylcarbamoyl)-*N*'-(3,5-*****bis*(trifluoromethyl)phenylcarbamoyl)diethylenetriamine**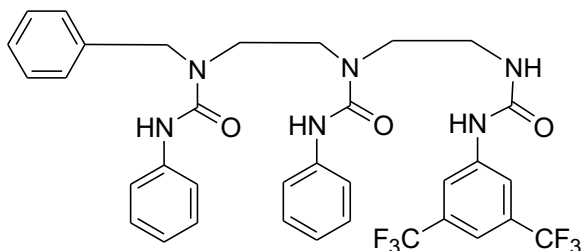

Following general procedure G with a solution of primary amine **1dc** (50 mg, 0.116 mmol) in CH<sub>2</sub>Cl<sub>2</sub> (3 mL) and 3,5-*bis*(trifluoromethyl)phenyl isocyanate (0.022 mL, 0.13 mmol), the residue was purified by flash chromatography on silica gel (eluent: CH<sub>2</sub>Cl<sub>2</sub> : MeOH 95:5) to afford the triurea **1d** (35 mg, 0.051 mmol, 44%) along with recovered starting material (20 mg, 40%). <sup>1</sup>H NMR (500 MHz, Acetone d<sub>6</sub>) δ 9.12 (s, 1H, *NHPh*(CF<sub>3</sub>)<sub>2</sub>), 8.20 (s, 2H, 2 x *CH<sub>Ph</sub>*(CF<sub>3</sub>)<sub>2</sub>), 7.80 (d, *J* = 8.1 Hz, 2H, 2 x *CH<sub>Ph</sub>* ortho), 7.78-7.74 (m, 2H, 2 x *CH<sub>Ph</sub>* ortho), 7.56 (s, 1H, *CH<sub>Ph</sub>*(CF<sub>3</sub>)<sub>2</sub>), 7.41 – 7.29 (m, 4H, 4 x *CH<sub>Bn</sub>*), 7.28 – 7.21 (m, 5H, 4 x *CH<sub>Ph</sub>* meta, *CH<sub>Bn</sub>* para), 7.02 – 6.92 (m, 2H, 2 x *CH<sub>Ph</sub>* para), 4.69 (s, 2H, *CH<sub>2</sub>Ph*), 3.66 – 3.48 (m, 6H, 3 x *CH<sub>2</sub>N*), 3.41 (q, *J* = 7.0, 6.0 Hz, 2H, *CH<sub>2</sub>N*). <sup>13</sup>C NMR (126 MHz, Acetone d<sub>6</sub>) δ 156.3 (3C, 3 x C=O), 155.8 (1C, C=ONBn), 142.3 (*C<sub>Ph</sub>*(CF<sub>3</sub>)<sub>2</sub>), 141.0 (*C<sub>Ph</sub>*), 140.7 (*C<sub>Ph</sub>*), 139.0 (*C<sub>Bn</sub>*), 131.5 (q, *J* = 32.7 Hz, 2C, 2 x CCF<sub>3</sub>), 128.5 (2C, 2 x *CH<sub>Ph</sub>* meta), 128.4 (2C, 2 x *CH<sub>Ph</sub>* metao), 128.3 (1C, *CH<sub>Bn</sub>* para), 127.5 (2C, 2 x *CH<sub>Bn</sub>*), 127.1 (2C, 2 x *CH<sub>Bn</sub>*), 123.7 (q, *J* = 272.0 Hz, 2C, 2 x CF<sub>3</sub>), 122.1 (1C, *CH<sub>Ph</sub>* para), 121.9 (1C, *CH<sub>Ph</sub>* para), 119.4 (2C, 2 x *CH<sub>Ph</sub>* ortho), 119.2 (2C, 2 x *CH<sub>Ph</sub>* ortho), 117.9 (2C, 2 x *CH<sub>Ph</sub>*(CF<sub>3</sub>)<sub>2</sub> ortho), 114.3 (*CH<sub>Ph</sub>*(CF<sub>3</sub>)<sub>2</sub> para), 50.6 (*CH<sub>2</sub>Ph*), 47.6 (1C, *CH<sub>2</sub>N*), 47.5 (1C, *CH<sub>2</sub>N*), 39.6 (1C, *CH<sub>2</sub>N*), 39.5 (1C, *CH<sub>2</sub>N*). HR – MS (ESI, positive ion mode) – *m/z* for [C<sub>34</sub>H<sub>32</sub>N<sub>6</sub>O<sub>3</sub>F<sub>6</sub>Na]<sup>+</sup> 709.2332, found 709.2302. MP 216-218 °C.

**1e *N,N'*-bis(4-butoxyphenylcarbamoyl)-*N*-benzyl-*N'*-(3,5-*bis*(trifluoromethyl)phenylcarbamoyl) diethylenetriamine**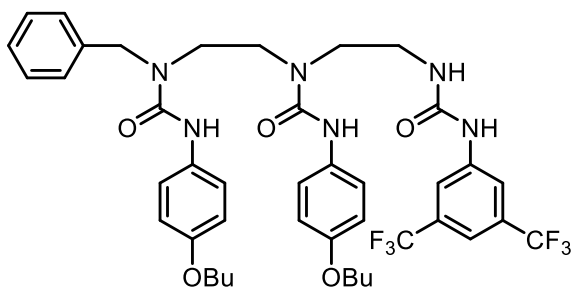

Following general procedure G using *N,N'*-bis(4-butoxyphenylcarbamoyl)-*N*-benzyl diethylenetriamine **1ec** (24 mg, 0.042 mmol) and 3,5-*bis*(trifluoromethyl)phenyl isocyanate (0.007 mL, 0.042 mmol), the title compound was obtained (28 mg, 0.032 mmol, 78%) as a white solid. <sup>1</sup>H NMR (500 MHz, CD<sub>2</sub>Cl<sub>2</sub>) δ 9.33 (bs, 1H, *NH<sub>urea</sub>*), 8.82 – 8.44 (m, 2H, 2 x *NH<sub>urea</sub>*), 7.77 (s, 2H, 2 x *CH<sub>Ar</sub>*), 7.57 – 7.48 (m, 2H, 2 x *CH<sub>Ar</sub>*), 7.46 (s, 1H, *CH<sub>Ar</sub>*), 7.48 – 7.39 (m, 2H, 2 x *CH<sub>Ar</sub>*), 7.35 – 7.29 (m, 2H, 2 x *CH<sub>Bn</sub>*), 7.26 (t, *J* = 7.6 Hz, 2H, 2 x *CH<sub>Bn</sub>*), 7.07 (m, 1H, *CH<sub>Bn</sub>*), 6.86 – 6.67 (m, 4H, 4 x *CH<sub>Ar</sub>*), 6.54 (s, 1H, *NHCH<sub>2</sub>*), 4.69 (s, 2H, *CH<sub>2</sub>Ph*), 3.92 (t, *J* = 6.6 Hz, 2H, *CH<sub>2</sub>O*), 3.85 (t, *J* = 6.6 Hz, 2H, *CH<sub>2</sub>O*), 3.58 – 3.47 (m, 2H, *CH<sub>2</sub>*), 3.47 – 3.34 (m, 2H, *CH<sub>2</sub>*), 3.27 – 3.10 (m, 2H, *CH<sub>2</sub>*), 2.88 – 2.65 (m, 2H, *CH<sub>2</sub>NH*), 1.81 – 1.68 (m, 4H, 2 x *CH<sub>2</sub>*), 1.57 – 1.42 (m, 4H, 2 x *CH<sub>2</sub>*), 1.03 – 0.96 (m, 6H, 2 x *CH<sub>3</sub>*). <sup>1</sup>H NMR (400 MHz, CDCl<sub>3</sub>) δ 8.18 (s, 2H, 2*NH*), 7.68 (s, 3H, *NH*, 2 x *CH<sub>Ar</sub>*), 7.20 (d, *J* = 7.5 Hz, 10H, 10 x *CH<sub>Ar</sub>*), 6.71 (d, *J* = 8.5 Hz, 2H, 2 x *CH<sub>Ar</sub>*), 6.65 (d, *J* = 8.3 Hz, 2H, 2 x *CH<sub>Ar</sub>*), 6.48 (s, 1H, *NHCH<sub>2</sub>*), 4.59 (s, 2H, *CH<sub>2</sub>Ph*), 3.83 (dt, *J* = 10.9, 6.5 Hz, 4H), 3.58 (m, 2H), 3.40 (s, 4H), 2.98 (m, 2H), 1.82 – 1.65 (m, 4H, 2 x *CH<sub>2</sub>*), 1.45 (hd, *J* = 7.4, 3.2 Hz, 4H, 2 x *CH<sub>2</sub>*), 0.96

(td,  $J = 7.4, 2.7$  Hz, 6H, 2 x  $\text{CH}_3$ ).  $^{13}\text{C}$  NMR (126 MHz,  $\text{CD}_2\text{Cl}_2$ )  $\delta$  158.1 (C=O), 157.4 (C=O), 157.3 (C=O), 156.3 ( $\text{C}_{\text{Ar}}$ ), 155.6 ( $\text{C}_{\text{Ar}}$ ), 141.8 ( $\text{C}_{\text{Ar}}$ ), 138.5 ( $\text{C}_{\text{Bn}}$ ), 133.2 ( $\text{C}_{\text{Ar}}$ ), 132.5 ( $\text{C}_{\text{Ar}}$ ), 132.1 (q,  $J = 32.9$  Hz, 2C, 2 x  $\text{CCF}_3$ ), 129.6 (2C, 2 x  $\text{CH}_{\text{Bn}}$ ), 128.0 ( $\text{CH}_{\text{Bn}}$ ), 127.0 (2C, 2 x  $\text{CH}_{\text{Bn}}$ ), 124.0 (q,  $J = 272.6$  Hz, 2C, 2 x  $\text{CF}_3$ ), 123.3 (2C, 2 x  $\text{CH}_{\text{Ar}}$ ), 121.6 (2C, 2 x  $\text{CH}_{\text{Ar}}$ ), 118.5 (2C, 2 x  $\text{CH}_{\text{Ar}}$ ), 115.4 ( $\text{CH}_{\text{Ar}}$ ), 115.2 (2C, 2 x  $\text{CH}_{\text{Ar}}$ ), 115.0 (2C, 2 x  $\text{CH}_{\text{Ar}}$ ), 68.4 (2C, 2 x  $\text{CH}_2\text{O}$ ), 52.2 ( $\text{CH}_2\text{Ph}$ ), 48.3 ( $\text{CH}_2\text{N}$ ), 48.2 ( $\text{CH}_2\text{N}$ ), 47.2 ( $\text{CH}_2\text{NBn}$ ), 39.6 ( $\text{CH}_2\text{NH}$ ), 31.9 (2C, 2 x  $\text{CH}_2$ ), 19.7 (2C, 2 x  $\text{CH}_2$ ), 14.2 (2C, 2 x  $\text{CH}_3$ ). FTIR (neat)  $\nu_{\text{max}} = 3298, 2963, 2937, 2872, 1640, 1552, 1511, 1278, 1130$   $\text{cm}^{-1}$ . HR – MS (ESI, positive ion mode) –  $m/z$  for  $[\text{C}_{42}\text{H}_{48}\text{F}_6\text{N}_6\text{O}_5+\text{H}]^+$  831.3663, observed 831.3654. MP 170-171 °C.

### 3a *N*-Ethyl-*N,N'*-bis(phenylcarbamoyl)-*N'*-(4-trifluoromethylphenylcarbamoyl)diethylenetriamine

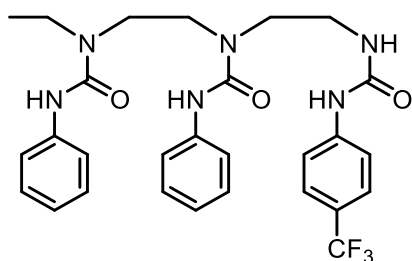

To a solution of *N*-ethyl-*N,N'*-bis(phenylcarbamoyl)diethylenetriamine **3ac** (20 mg, 0.054 mmol) in  $\text{CH}_2\text{Cl}_2$  (1 mL) was added 4-trifluoromethylphenyl isocyanate (0.01 mL, 0.07 mmol, 1.3 equiv.) and the mixture was stirred at 20 °C for 16 hours. The product crushed out of solution (25 mg, 0.0448 mmol, 83%).  $^1\text{H}$  NMR (400 MHz,  $\text{CD}_2\text{Cl}_2+\text{CH}_3\text{OH}$ )  $\delta$  8.70 (s, 1H, NH), 8.28 (s, 1H, NH), 7.67 (s, 1H, NH), 7.48 (dd, 2H,  $J = 8.6, 1.2$  Hz, 2 x  $\text{CH}_{\text{Ar}}$ ), 7.42 – 7.35 (m, 6H, 6 x  $\text{CH}_{\text{Ar}}$ ), 7.22 – 7.06 (m, 4H, 4 x  $\text{CH}_{\text{Ar}}$ ), 7.04 – 6.83 (m, 2H, 2 x  $\text{CH}_{\text{Ar}}$ ), 6.19 – 6.09 (t, 1H,  $J = 4.8$  Hz,  $\text{NHCH}_2$ ), 3.48 – 3.39 (m, 6H, 3 x  $\text{CH}_2\text{N}$ ), 3.33 (q,  $J = 7.1$  Hz, 2H,  $\text{CH}_2\text{CH}_3$ ), 3.26 (q,  $J = 6.4, 4.8$  Hz, 2H,  $\text{CH}_2\text{NH}$ ), 1.13 (t,  $J = 7.1$  Hz, 3H,  $\text{CH}_3\text{CH}_2$ ).  $^{13}\text{C}$  NMR (101 MHz,  $\text{CD}_2\text{Cl}_2+\text{CH}_3\text{OH}$ )  $\delta$  157.6 (C=O urea Ph), 157.1 (C=O urea  $\text{PhCF}_3$ ), 156.7 (C=O urea  $\text{CH}_3\text{CH}_2\text{NCO}$ ), 143.7 ( $\text{C}_{\text{Ar}}$ ), 143.6 ( $\text{C}_{\text{Ar}}$ ), 140.3 ( $\text{C}_{\text{Ar}}$ ), 140.0 ( $\text{C}_{\text{Ar}}$ ), 129.2 (2C, 2 x  $\text{CH}_{\text{Ar}}$ ), 129.2 (2C, 2 x  $\text{CH}_{\text{Ar}}$ ), 126.6 (q,  $J = 3.7$  Hz), 123.65 (q,  $J = 33.2$  Hz,  $\text{CCF}_3$ ), 121.8 (q,  $J = 271.4$  Hz,  $\text{CF}_3$ ), 123.5 ( $\text{CH}_{\text{Ar}}$ ), 123.4 ( $\text{CH}_{\text{Ar}}$ ), 120.9 (2C, 2 x  $\text{CH}_{\text{Ar}}$ ), 120.8 (2C, 2 x  $\text{CH}_{\text{Ar}}$ ), 118.5 (2C, 2 x  $\text{CH}_{\text{Ar}}$ ), 118.4 (2C, 2 x  $\text{CH}_{\text{Ar}}$ ), 48.3 ( $\text{CH}_2\text{N}$ ), 47.8 ( $\text{CH}_2\text{N}$ ), 46.8 ( $\text{CH}_2\text{N}$ ), 43.7 ( $\text{CH}_2\text{CH}_3$ ), 40.1 ( $\text{CH}_2\text{NH}$ ), 14.3 ( $\text{CH}_3$ ). FTIR (neat)  $\nu_{\text{max}} = 3300, 3113, 2936, 1642, 1599, 1548, 1319, 1247, 1111, 1066$   $\text{cm}^{-1}$ . HR – MS (ESI, positive ion mode) –  $m/z$  for  $[\text{C}_{28}\text{H}_{31}\text{F}_3\text{N}_6\text{O}_3+\text{Na}]^+$  579.2302, observed 579.2286. MP 184-185 °C.

### 3b *N*-Ethyl-*N,N'*-bis(phenylcarbamoyl)-*N'*-(3,5-bis(trifluoromethyl)phenylcarbamoyl)diethylenetriamine

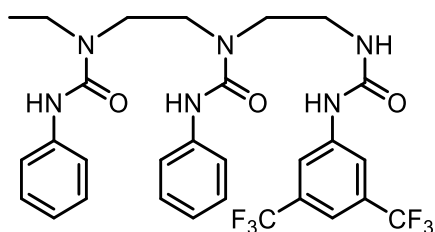

Following general procedure E, *N*-ethyl-*N,N'*-bis(phenylcarbamoyl)-*N'*-(tertbutoxycarbonyl)diethylenetriamine **3ab** (43 mg, 0.09 mmol) afforded *N*-ethyl-*N,N'*-bis(phenylcarbamoyl)diethylenetriamine **3ac** (27 mg, 0.072 mmol, 80%) that was used without purification to the next step. Following general procedure G, **3ac** (8.5 mg, 0.023 mmol) afforded the title product **3b** (14 mg, quantitative yield) as a white solid.  $^1\text{H}$  NMR (400 MHz,  $\text{DMSO}-d_6$ )  $\delta$  9.44 (s, 1H,  $\text{NH}_{\text{Ar3}}$ ), 8.86 (s, 1H,



NH), 8.60 (s, 1H, NH), 8.11 (d,  $J = 1.6$  Hz, 2H, 2 x  $CH_{Ar3}$ ), 7.65 – 7.46 (m, 5H, 2 x  $CH_{Ar1}$ , 2 x  $CH_{Ar2}$ ,  $CH_{Ar3}$ ), 7.30 – 7.13 (m, 4H, 2 x  $CH_{Ar1}$ , 2 x  $CH_{Ar2}$ ), 6.93 (m, 2H,  $CH_{Ar1}$ ,  $CH_{Ar2}$ ), 6.69 (s, 1H,  $NHCH_2$ ), 3.57 – 3.35 (m, 8H, 4 x  $CH_2$ ), 3.31 (m, 2H,  $CH_2NH$ ), 1.09 (t,  $J = 7.0$  Hz, 3H,  $CH_3$ ).  $^{13}C$  NMR (101 MHz, DMSO –  $d_6$ )  $\delta$  155.5 (C=O), 155.4 (C=O), 155.1 (C=O  $_{Ar3}$ ), 142.4 ( $C_{Ar3}$ ), 140.4 (2C,  $C_{Ar1}$ ,  $C_{Ar2}$ ), 130.6 (2C,  $J = 32.5$  Hz, 2 x  $CCF_3$ ), 128.2 (4C, 2 x  $CH_{Ar1}$ , 2 x  $CH_{Ar2}$ ), 124.7 (2C,  $J = 274.15$  Hz, 2 x  $CF_3$ ), 121.8 (2C,  $CH_{Ar1}$ ,  $CH_{Ar2}$ ), 119.8 (2C, 2 x  $CH_{Ar2}$ ), 119.3 (2C, 2 x  $CH_{Ar1}$ ), 117.4 (2C, 2 x  $CH_{Ar3}$ ), 113.6 ( $CH_{Ar3}$ ), 47.1 – 45.4 (4C, 4 x  $CH_2N$ ), 42.0 ( $CH_2CH_3$ ), 14.0 ( $CH_3$ ). FTIR (neat)  $\nu_{max} = 3301, 2933, 1646, 1552, 1385, 1277, 1130$   $cm^{-1}$ . HR – MS (ESI, positive ion mode) –  $m/z$  for  $[C_{29}H_{30}F_6N_6O_3+H]^+$  625.2356, observed 625.2346. MP 218-219 °C.

**Compound 5ab: *N,N''-bis(hexylcarbamoyl)-N-benzyl-N'-(tertbutoxycarbonyl)triethylenetetramine***

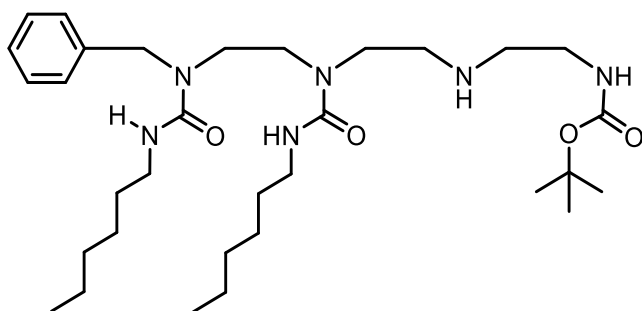

Following general procedure C with *N,N''-bis(hexylcarbamoyl)-N-benzyl*diethylenetriamine **1ac** (336 mg, 0.75 mmol), *N-Boc-2-aminoacetaldehyde* (191 mg, 1.2 mmol) and  $NaBH_4$  (89 mg, 2.4 mmol), the title compound **5ab** was obtained (110 mg, 0.22 mmol, 29 %) as a colourless oil.  $^1H$  NMR (400 MHz,  $CDCl_3$ )  $\delta$  7.30 (m, 2H, 2 x  $CH_{Ph}$ ), 7.24 (d,  $J = 7.0$  Hz, 1H,  $CH_{Ph}$ ), 7.23 – 7.16 (m, 2H, 2 x  $CH_{Ph}$ ), 6.46 (t,  $J = 5.4$  Hz, 1H,  $NHBoc$ ), 5.54 (s, 1H,  $NH_{hexyl}$ ), 5.07 (s, 1H,  $NH_{hexyl}$ ), 4.46 (s, 2H,  $CH_2Ph$ ), 3.32 (m, 2H,  $CH_2NBn$ ), 3.24 – 3.08 (m, 8H, 4 x  $CH_2$ ), 2.69 (m, 4H, 2 x  $CH_2N$ ), 2.46 (bs, 1H, NH), 1.53 – 1.42 (m, 4H, 2 x  $CH_{2hexyl}$ ), 1.41 (s, 9H,  $(CH_3)_3C$ ), 1.34 – 1.11 (m, 12H, 6 x  $CH_{2hexyl}$ ), 0.95 – 0.66 (m, 6H, 2 x  $CH_3_{hexyl}$ ).  $^{13}C$  NMR (101 MHz,  $CDCl_3$ )  $\delta$  159.6 (C=O $_{Boc}$ ), 158.7 (C=O $_{urea}$ ), 156.3 (C=O $_{urea}$ ), 138.3 ( $C_{Ph}$ ), 128.8 (2C, 2 x  $CH_{Ph}$ ), 127.5 ( $CH_{Ph}$ ), 127.2 (2C, 2 x  $CH_{Ph}$ ), 79.4 ( $C(CH_3)_3$ ), 51.3 ( $CH_2Ph$ ), 49.5 ( $CH_2N$ ), 48.7 ( $CH_2N$ ), 46.9 (2C, 2 x  $CH_2N$ ), 46.2 ( $CH_2NBn$ ), 40.9 (2C, 2 x  $CH_2NH_{hexyl}$ ), 39.9 ( $CH_2NHBoc$ ), 31.6 (2C, 2 x  $CH_2$ ), 30.1 (2C, 2 x  $CH_2$ ), 28.5 (3C,  $(CH_3)_3C$ ), 26.6 (2C, 2 x  $CH_2$ ), 22.7 (2C, 2 x  $CH_2$ ), 14.1 (2C, 2 x  $CH_3_{hexyl}$ ). FTIR (neat)  $\nu_{max} = 3292, 2955, 2927, 2857, 1638, 1625, 1535, 1364, 1252, 1171$   $cm^{-1}$ . HR – MS (ESI, positive ion mode) –  $m/z$  for  $[C_{32}H_{58}N_6O_4+H]^+$  591.4592, observed 591.4581.

**Compound 5ac: *N,N',N'''-tri(hexylcarbamoyl)-N-benzyl-N'-(tertbutoxycarbonyl)triethylenetetramine***

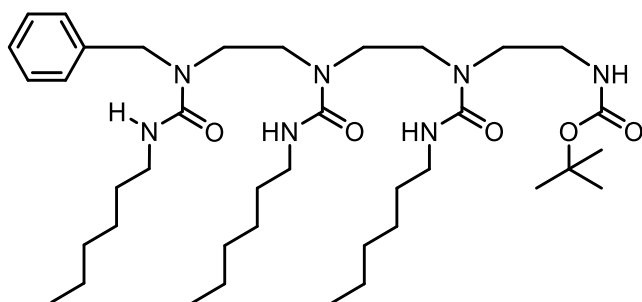

Following general procedure D starting from *N,N'*-bis(hexylcarbamoyl)-*N*-benzyl-*N'*-(*tert*butoxycarbonyl)triethylenetetramine **5ab** (100 mg, 0.17 mmol) and hexyl isocyanate (40  $\mu$ L, 0.25 mmol), the title compound **5ac** was obtained as a colourless oil after silica gel flash chromatography (CH<sub>2</sub>Cl<sub>2</sub>:MeOH 97:3) (94 mg, 0.13 mmol, 78 %). <sup>1</sup>H NMR (400 MHz, CDCl<sub>3</sub>)  $\delta$  7.26 (d, *J* = 7.3 Hz, 2H, 2 x CH<sub>Ph</sub>), 7.21 (d, *J* = 6.5 Hz, 1H, CH<sub>Ph</sub>), 7.17 – 7.12 (m, 2H, 2 x CH<sub>Ph</sub>), 6.46 (t, *J* = 5.2 Hz, 1H, NH), 6.19 (s, 1H, NH<sub>hexyl</sub>), 5.14 (m, 1H, NH<sub>hexyl</sub>), 5.45 – 4.80 (bs, 1H, NH<sub>hexyl</sub>), 4.38 (s, 2H, CH<sub>2</sub>Ph), 3.28 (m, 2H, CH<sub>2</sub>), 3.24 – 2.99 (m, 16H, 8 x CH<sub>2</sub>), 1.53 – 1.41 (m, 4H, 2 x CH<sub>2 hexyl</sub>), 1.40 – 1.34 (2 H, CH<sub>2 hexyl</sub>), 1.35 (s, 9 H, (CH<sub>3</sub>)<sub>3</sub>C), 1.31 – 1.19 (m, 12 H, 6 x CH<sub>2 hexyl</sub>), 1.19 – 1.08 (m, 6H, 3 x CH<sub>2 hexyl</sub>), 0.89 – 0.70 (m, 9H, 3 x CH<sub>3 hexyl</sub>). <sup>13</sup>C NMR (101 MHz, CDCl<sub>3</sub>)  $\delta$  158.8 (C=O), 158.7 (C=O), 158.7 (C=O), 156.8 (C=O), 137.8 (C<sub>Ph</sub>), 129.0 (2C, 2 x CH<sub>Ph</sub>), 127.7 (CH<sub>Ph</sub>), 126.9 (2C, 2 x CH<sub>Ph</sub>), 79.8 (C(CH<sub>3</sub>)<sub>3</sub>), 52.0 (CH<sub>2</sub>Ph), 47.6 – 47.2 (5C, 5 x CH<sub>2</sub>N), 41.1 – 41.0 (3 x CH<sub>2 hexyl</sub>), 40.0 (CH<sub>2</sub>N), 31.7 – 31.5 (3 x CH<sub>2 hexyl</sub>), 30.0 – 29.9 (3 x CH<sub>2 hexyl</sub>), 28.4 (3C, (CH<sub>3</sub>)<sub>3</sub>C), 26.8 – 26.6 (3 x CH<sub>2 hexyl</sub>), 22.6 (3C, 3 x CH<sub>2 hexyl</sub>), 14.1 (3C, 3 x CH<sub>3 hexyl</sub>). FTIR (neat)  $\nu_{max}$  = 3295, 2955, 2928, 2858, 1690, 1628, 1642, 1355, 1266, 1262 cm<sup>-1</sup>. HR – MS (ESI, positive ion mode) – *m/z* for [C<sub>21</sub>H<sub>32</sub>N<sub>7</sub>O<sub>5</sub>+H]<sup>+</sup> 740.5409, observed 740.5554.

**Compound** **5bc**: *N'',N'''*-bis(hexylcarbamoyl)-*N*-benzyl-*N*-(*tert*butylcarbamoyl)-*N'*-(*tert*butoxycarbonyl)triethylenetetramine

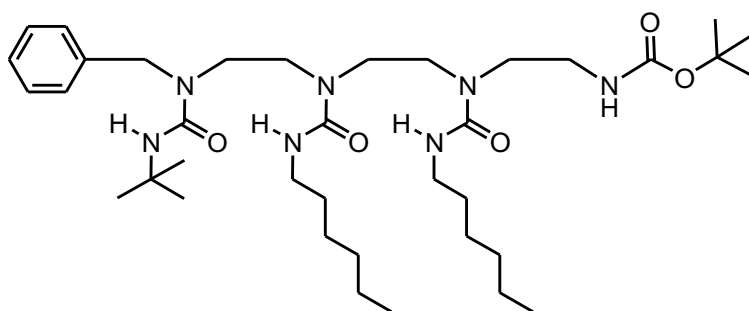

Following general procedure C using *N*-benzyl-*N*-(*tert*butylcarbamoyl)-*N'*-(hexylcarbamoyl) triethylenetetramine (336 mg, 0.75 mmol), *N*-Boc-2-aminoacetaldehyde (191 mg, 1.2 mmol) and NaBH<sub>4</sub> (89 mg, 2.4 mmol), *N''*-(hexylcarbamoyl)-*N*-benzyl-*N*-(*tert*butylcarbamoyl)-*N'*-(*tert*butoxycarbonyl)triethylenetetramine **5bb** was obtained (173 mg, 0.29 mmol, 39 %) and was used without extensive purification in procedure D (hexyl isocyanate 68  $\mu$ L, 0.45 mmol) to give title compound **5bc** as a colourless oil (135 mg, 0.194 mmol, 66 %). <sup>1</sup>H NMR (400 MHz, CDCl<sub>3</sub>)  $\delta$  7.37 – 7.31 (m, 2H, 2 x CH<sub>Ar</sub>), 7.30 – 7.24 (m, 1H, CH<sub>Ar</sub>), 7.20 (d, *J* = 7.7 Hz, 2H, 2 x CH<sub>Ar</sub>), 6.72 (t, 1H, NHCH<sub>2 hexyl</sub>), 6.32 (t, 1H, NHCH<sub>2 hexyl</sub>), 5.28 (m, 1H, NH<sub>Boc</sub>), 4.62 (s, 1H, NH<sub>tBu</sub>), 4.39 (s, 2H, CH<sub>2</sub>Ph), 3.38 – 3.31 (m, 2H, CH<sub>2</sub>N), 3.30 – 3.10 (m, 14H, 7 x CH<sub>2</sub>), 1.61 – 1.48 (m, 4H, 2 x CH<sub>2 hexyl</sub>), 1.41 (s, 9H, 3 x CH<sub>3 Boc</sub>), 1.38 – 1.25 (m, 12 H, 6 x CH<sub>2 hexyl</sub>), 1.24 (s, 9H, 3 x CH<sub>3 tBu urea</sub>), 0.96 – 0.76 (m, 6H, 2 x CH<sub>3 Hexyl</sub>). <sup>13</sup>C NMR (101 MHz, CDCl<sub>3</sub>)  $\delta$  158.8 (C=O), 158.8 (C=O), 157.9 (C=O<sub>tBu urea</sub>), 156.8 (C=O<sub>Boc</sub>), 137.7 (C<sub>Ar</sub>), 129.0 (2C, 2 x CH<sub>Ar</sub>), 127.7 (CH<sub>Ar</sub>), 126.7 (2C, 2 x CH<sub>Ar</sub>), 79.6 (C(CH<sub>3</sub>)<sub>3 Boc</sub>), 52.4 (CH<sub>2</sub>Ph), 51.0 (C(CH<sub>3</sub>)<sub>3</sub>), 47.7– 47.0 (5 x C, CH<sub>2</sub>N), 41.1 (2C, 2 x CH<sub>2</sub>NH), 40.1 (CH<sub>2</sub>NH), 31.7 (CH<sub>2</sub>), 31.7 (CH<sub>2</sub>), 29.9 (CH<sub>2</sub>), 29.8 (CH<sub>2</sub>), 29.3 (3C, 3 x CH<sub>3 C</sub>), 28.4 (3C, 3 x CH<sub>3 Boc</sub>), 26.8 (CH<sub>2</sub>), 26.7 (CH<sub>2</sub>), 22.6 (2C,

2 x CH<sub>2</sub>), 14.1 (2C, 2 x CH<sub>3</sub>). **FTIR (neat)**  $\nu_{\text{max}}$  = 3304, 2928, 2863, 1687, 1628, 1532, 1364, 1299, 1169 cm<sup>-1</sup>. **HR – MS** (ESI, positive ion mode) –  $m/z$  for [C<sub>37</sub>H<sub>67</sub>N<sub>7</sub>O<sub>5</sub>+H]<sup>+</sup> 690.5276, observed 690.5270.

**Compound 5ad: *N*-benzyl-*N*',*N*'',*N*''''-tri(hexylcarbamoyl)triethylenetetramine**

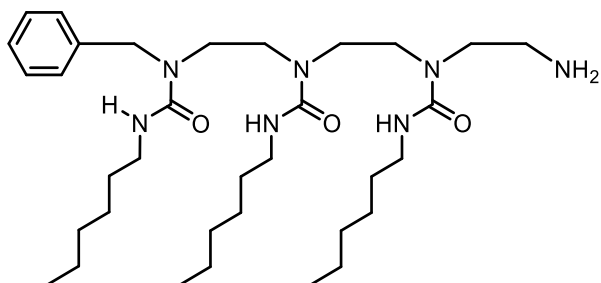

Following general procedure E with *N,N',N''*'-tri(hexylcarbamoyl)-*N*-benzyl-*N'*-(*tert*butoxycarbonyl)triethylenetetramine **5ac** (100 mg, 0.13 mmol), the title compound **5ad** was obtained (70 mg, 0.104 mmol, 80 %) as an oil. **<sup>1</sup>H NMR** (400 MHz, CDCl<sub>3</sub>)  $\delta$  7.26 (t,  $J$  = 7.4 Hz, 2H, 2 x CH<sub>Ph</sub>), 7.19 (s, 1H, CH<sub>Ph</sub>), 7.15 (d,  $J$  = 7.6 Hz, 2H, 2 x CH<sub>Ph</sub>), 6.61 (t,  $J$  = 5.4 Hz, 1H, NH), 6.52 (t,  $J$  = 5.3 Hz, 1H, NH), 5.35 (s, 1H, NH), 4.40 (s, 2H, CH<sub>2</sub>Ph), 3.27 (m, 2H, CH<sub>2</sub>), 3.21 – 3.02 (m, 14 H, 7 x CH<sub>2</sub>), 2.76 (m, 2H, CH<sub>2</sub>NH<sub>2</sub>), 1.93 (s, 2H, NH<sub>2</sub>), 1.53 – 1.32 (m, 6H, 3 x CH<sub>2</sub> hexyl), 1.32 – 1.10 (m, 18H, 9 x CH<sub>2</sub> hexyl), 0.80 (m, 9H, 3 x CH<sub>3</sub> hexyl). **<sup>13</sup>C NMR** (101 MHz, CDCl<sub>3</sub>)  $\delta$  160.1 (C=O<sub>urea</sub>), 158.8 (C=O<sub>urea</sub>), 158.7 (C=O<sub>urea</sub>), 138.2 (C<sub>Ph</sub>), 128.9 (2 C, 2 x CH<sub>Ph</sub>), 127.5 (CH<sub>Ph</sub>), 127.1 (2 C, 2 x CH<sub>Ph</sub>), 51.9 (CH<sub>2</sub>), 51.8 (CH<sub>2</sub>Ph), 47.2 (CH<sub>2</sub>), 47.2 (CH<sub>2</sub>), 47.1 (CH<sub>2</sub>), 46.9 (CH<sub>2</sub>), 41.4 (CH<sub>2</sub>NH<sub>2</sub>), 41.1 – 40.9 (3 x CH<sub>2</sub> hexyl), 31.6 (3C, 3 x CH<sub>2</sub> hexyl), 30.1 (3C, 3 x CH<sub>2</sub> hexyl), 26.8 (2C, 2 x CH<sub>2</sub> hexyl), 26.6 (CH<sub>2</sub> hexyl), 22.7 (3C, 3 x CH<sub>2</sub>), 14.2 (CH<sub>3</sub> hexyl), 14.1 (2C, 2 x CH<sub>3</sub> hexyl). **FTIR (neat)**  $\nu_{\text{max}}$  = 3297, 2918, 2850, 1628, 1544, 1215 cm<sup>-1</sup>. **HR – MS** (ESI, positive ion mode) –  $m/z$  for [C<sub>34</sub>H<sub>63</sub>N<sub>7</sub>O<sub>3</sub>+H]<sup>+</sup> 618.5065, observed 618.5060.

**Compound 5bd: *N*-benzyl-*N*-(*tert*butylcarbamoyl)-*N*'',*N*''''-bis(hexylcarbamoyl)triethylenetetramine**

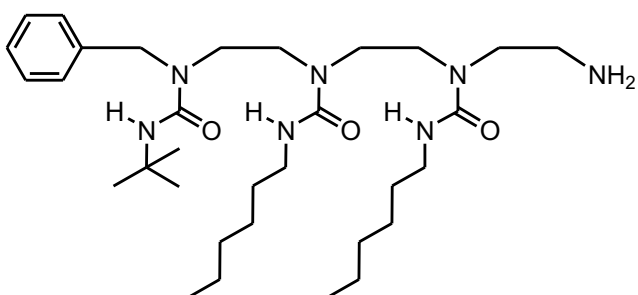

Following general procedure E using *N*'',*N*''''-bis(hexylcarbamoyl)-*N*-benzyl-*N*-(*tert*butylcarbamoyl)-*N'*-(*tert*butoxycarbonyl)triethylenetetramine **5bc** (130 mg, 0.19 mmol), the title compound **5bd** was isolated as a colourless oil (115 mg, 0.19 mmol, quantitative yield). **<sup>1</sup>H NMR** (400 MHz, CDCl<sub>3</sub>)  $\delta$  7.30 (m, 2H, 2 x CH<sub>Ar</sub>), 7.23 (t, 1H, CH<sub>Ar</sub>), 7.18 (d,  $J$  = 7.2 Hz, 2H, 2 x CH<sub>Ar</sub>), 6.71 (t, 1H, NH<sub>hexyl</sub>), 6.37 (t,  $J$  = 5.4 Hz, 1H, NH<sub>hexyl</sub>), 4.80 (bs, 1H, NH<sub>tBu</sub>), 4.39 (s, 2H, CH<sub>2</sub>Ph), 3.39 – 3.03 (m, 14H, CH<sub>2</sub>N), 2.80 (m, 2H, CH<sub>2</sub>NH<sub>2</sub>), 2.27 (bs, 2H, NH<sub>2</sub>), 1.29 – 1.17 (m, 16H, 8 x CH<sub>2</sub>), 1.24 (s, 9H, 3 x CH<sub>3</sub>, *t*Bu), 0.88 – 0.80 (m, 6H, 2 x CH<sub>3</sub>). **<sup>13</sup>C NMR** (101 MHz, CDCl<sub>3</sub>)  $\delta$  159.9 (C=O), 158.7 (C=O),

157.8 (C=O)NHtBu), 138.0 (C<sub>Ar</sub>), 128.9 (2C, 2 x CH<sub>Ar</sub>), 127.6 (CH<sub>Ar</sub>), 126.9 (2C, 2 x CH<sub>Ar</sub>), 52.1 (CH<sub>2</sub>Ph), 50.9 (C(CH<sub>3</sub>)<sub>3</sub>), 47.4 – 47.0 (4C, 4 x CH<sub>2</sub>N), 41.3 (CH<sub>2</sub>N), 41.1 (CH<sub>2</sub>), 40.1 (CH<sub>2</sub>), 31.7 (CH<sub>2</sub>), 31.6 (CH<sub>2</sub>), 30.0 (CH<sub>2</sub>), 29.9 (CH<sub>2</sub>), 29.3 (3C, 3 x CH<sub>3</sub>C), 28.4 (CH<sub>2</sub>NH<sub>2</sub>), 26.8 (CH<sub>2</sub>), 26.8 (CH<sub>2</sub>), 22.6 (2C, 2 x CH<sub>2</sub>), 14.1 (CH<sub>3</sub>), 14.1 (CH<sub>3</sub>). **FTIR (neat)** v<sub>max</sub> = 3298, 2956, 2927, 2857, 1631, 1538, 1268 cm<sup>-1</sup>. **HR – MS** (ESI, positive ion mode) – *m/z* for [C<sub>32</sub>H<sub>59</sub>N<sub>7</sub>O<sub>3</sub>+H]<sup>+</sup> 590.4752, observed 590.4755.

**Compound** **5a:** ***N*-benzyl-*N,N'',N'''*-tri(hexylcarbamoyl)-*N'*-(3,5-bis(trifluoromethyl)phenylcarbamoyl)triethylenetetramine**

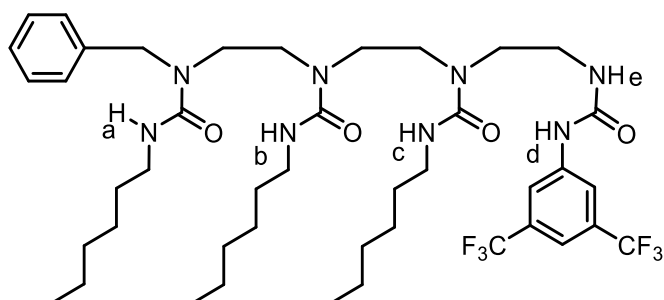

Following general procedure G, *N*-benzyl-*N,N'',N'''*-tri(hexylcarbamoyl)triethylenetetramine **5ad** (13 mg, 0.02 mmol) gave the title compound **5a** (18 mg, quantitative yield) as a white solid. <sup>1</sup>H NMR (400 MHz, CD<sub>2</sub>Cl<sub>2</sub>) δ 9.06 (s, 1H, NH<sub>d</sub>), 7.97 (s, 2H, CH<sub>Ar</sub>), 7.42 (s, 1H, CH<sub>Ar</sub>), 7.35 (t, *J* = 7.4 Hz, 2H, 2 x CH<sub>Ph</sub>), 7.27 (t, *J* = 7.3 Hz, 1H, CH<sub>Ph</sub>), 7.22 (d, *J* = 7.5 Hz, 2H, 2 x CH<sub>Ph</sub>), 6.84 (t, *J* = 5.3 Hz, 1H, NH<sub>b</sub>), 6.64 (s, 1H, NH<sub>c</sub>), 6.39 (s, 1H, NH<sub>e</sub>), 4.92 (bs, 1H, NH<sub>a</sub>), 4.44 (s, 2H, CH<sub>2</sub>Ph), 3.41 (m, 2H, CH<sub>2</sub>), 3.37 – 3.04 (m, 16H, 8 x CH<sub>2</sub>), 1.60 – 1.45 (m, 4H, 2 x CH<sub>2</sub>), 1.44 – 1.11 (m, 20H, 10 x CH<sub>2</sub>), 0.97 – 0.67 (m, 9H, 3 x CH<sub>3hexyl</sub>). <sup>13</sup>C NMR (101 MHz, CD<sub>2</sub>Cl<sub>2</sub>) δ 159.5 (2C, 2 x C=O), 159.4 (C=O), 156.5 (C=O<sub>Ar</sub> urea), 142.7 (C<sub>Ar</sub>), 138.0 (C<sub>Ph</sub>), 132.2 (q, *J* = 33.0 Hz, 2C, 2 x C<sub>Ar</sub>CF<sub>3</sub>), 131.7 (2C, 2 x CH<sub>Ph</sub>), 129.5 (CH<sub>Ph</sub>), 128.3 (2C, 2 x CH<sub>Ph</sub>), 124.1 (q, *J* = 272.5 Hz, 2C, 2 x CF<sub>3</sub>), 118.2 (CH<sub>Ar</sub>), 115.0 (CH<sub>Ar</sub>), 52.8 (CH<sub>2</sub>Ph), 49.0 – 47.8 (5C, 5 x CH<sub>2</sub>N), 41.8 – 41.5 (3C, 3 x CH<sub>2hexyl</sub>), 40.0 (CH<sub>2</sub>N), 32.2 – 32.1 (3C, 3 x CH<sub>2hexyl</sub>), 30.5 – 30.4 (3C, 3 x CH<sub>2hexyl</sub>), 27.3 – 27.0 (3C, 3 x CH<sub>2hexyl</sub>), 23.2 – 23.1 (3C, 3 x CH<sub>2hexyl</sub>), 14.4 – 14.3 (3C, 3 x CH<sub>3hexyl</sub>). **FTIR (neat)** v<sub>max</sub> = 3301, 2955, 2928, 1623, 1542, 1385, 1275, 1177, 1132 cm<sup>-1</sup>. **HR – MS** (ESI, positive ion mode) – *m/z* for [C<sub>43</sub>H<sub>67</sub>F<sub>6</sub>N<sub>8</sub>O<sub>4</sub>+H]<sup>+</sup> 873.5184, observed 873.5200 ; *m/z* for [C<sub>43</sub>H<sub>66</sub>F<sub>6</sub>N<sub>8</sub>O<sub>4</sub>+Na]<sup>+</sup> 895.5001, observed 895.5009. **MP** 50-51 °C.

**Compound** **5b:** ***N*-benzyl-*N*-(*tert*butylcarbamoyl)-*N'',N'''*-bis(hexylcarbamoyl)-*N'*-(3,5-bis(trifluoromethyl)phenylcarbamoyl)triethylenetetramine**

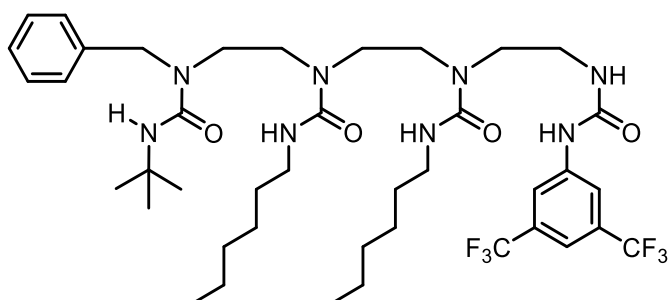

Following general procedure G, *N*-benzyl-*N*-(tertbutylcarbamoyl)-*N''*,*N'''*-bis(hexylcarbamoyl)triethylenetetramine **5bd** (28 mg, 0.047 mmol) afforded the title compound **5b** (15 mg, 0.0183 mmol, 39 %) as a solid. <sup>1</sup>H NMR (400 MHz, CDCl<sub>3</sub>) δ 8.88 (s, 1H, NH<sub>Ar</sub>), 7.96 (s, 2H, 2 x CH<sub>Ar</sub>), 7.43 (s, 1H, CH<sub>Ar</sub>), 7.39 (dd, *J* = 8.1, 6.4 Hz, 2H, 2 x CH<sub>Ph</sub>), 7.35 – 7.29 (m, 1H, CH<sub>Ph</sub>), 7.25 – 7.15 (m, 2H, 2 x CH<sub>Ph</sub>), 7.10 (s, 1H, NH<sub>hexyl</sub>), 6.93 (s, 1H, NH), 6.19 (s, 1H, NH<sub>hexyl</sub>), 4.39 (s, 2H, CH<sub>2</sub>Ph), 4.32 (s, 1H, NH), 3.38 (m, 12H, 6 x CH<sub>2</sub>), 3.31 – 3.25 (m, 2H, CH<sub>2</sub>N<sub>hexyl</sub>), 3.25 – 3.17 (m, 2H, CH<sub>2</sub>N<sub>hexyl</sub>), 1.62 (m, 2H, CH<sub>2</sub><sub>hexyl</sub>), 1.54 (dd, *J* = 7.3 Hz, 2H, CH<sub>2</sub><sub>hexyl</sub>), 1.43 – 1.26 (m, 12H, 6 x CH<sub>2</sub><sub>hexyl</sub>), 1.24 (s, 9H, (CH<sub>3</sub>)<sub>3</sub>C), 0.96 – 0.76 (m, 6H, 2 x CH<sub>3</sub><sub>hexyl</sub>). <sup>13</sup>C NMR (101 MHz, CDCl<sub>3</sub>) δ 159.2 (C=O<sub>urea</sub>), 158.9 (C=O<sub>urea</sub>), 158.1 (C=O<sub>tBu</sub>), 156.2 (C=O<sub>Ar urea</sub>), 141.8 (C<sub>Ar</sub>), 137.0 (C<sub>Ph</sub>), 132.1 (q, *J* = 33.2 Hz, 2C, 2 x CCF<sub>3</sub>), 129.3 (2C, 2 x CH<sub>Ph</sub>), 128.1 (CH<sub>Ph</sub>), 126.4 (2C, 2 x CH<sub>Ph</sub>), 123.3 (q, *J* = 272.6 Hz, 2C, 2 x CF<sub>3</sub>), 117.9 (2C, 2 x CH<sub>Ar</sub>), 114.9 (CH<sub>Ar</sub>), 53.1 (CH<sub>2</sub>Ph), 51.2 (C(CH<sub>3</sub>)<sub>3</sub>), 48.7 – 47.4 (5 x CH<sub>2</sub>N), 41.5 – 41.2 (3 x CH<sub>2</sub><sub>hexyl</sub>), 39.5 (CH<sub>2</sub>N), 31.8 – 31.6 (3 x CH<sub>2</sub><sub>hexyl</sub>), 29.9 (CH<sub>2</sub><sub>hexyl</sub>), 29.7 (CH<sub>2</sub><sub>hexyl</sub>), 29.3 (CH<sub>2</sub><sub>hexyl</sub>), 29.3 (3C, (CH<sub>3</sub>)<sub>3</sub>C), 26.8 (3C, 3 x CH<sub>2</sub><sub>hexyl</sub>), 22.7 (3C, 3 x CH<sub>2</sub><sub>hexyl</sub>), 14.1 (3C, 3 x CH<sub>3</sub><sub>hexyl</sub>). FTIR (neat) ν<sub>max</sub> = 3308, 2958, 2929, 2863, 1626, 1543, 1387, 1275, 1132 cm<sup>-1</sup>. HR – MS (ESI, positive ion mode) – *m/z* for [C<sub>41</sub>H<sub>62</sub>F<sub>6</sub>N<sub>8</sub>O<sub>4</sub>+H]<sup>+</sup> 845.4871, observed 845.4872. MP 75–76 °C.

#### 4. <sup>1</sup>H and <sup>13</sup>C NMR spectra of synthesised compounds

##### 2aa *N*-trifluoroacetyl-*N'*-benzylethylenediamine (400 MHz, CDCl<sub>3</sub>)

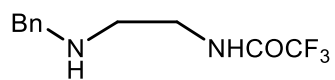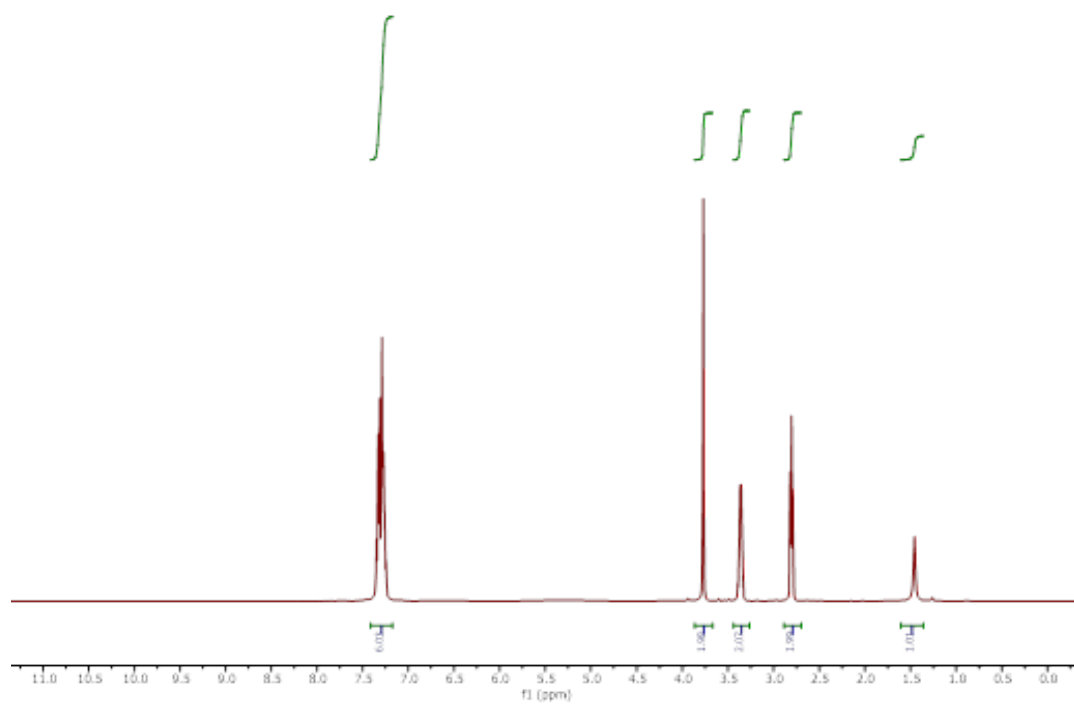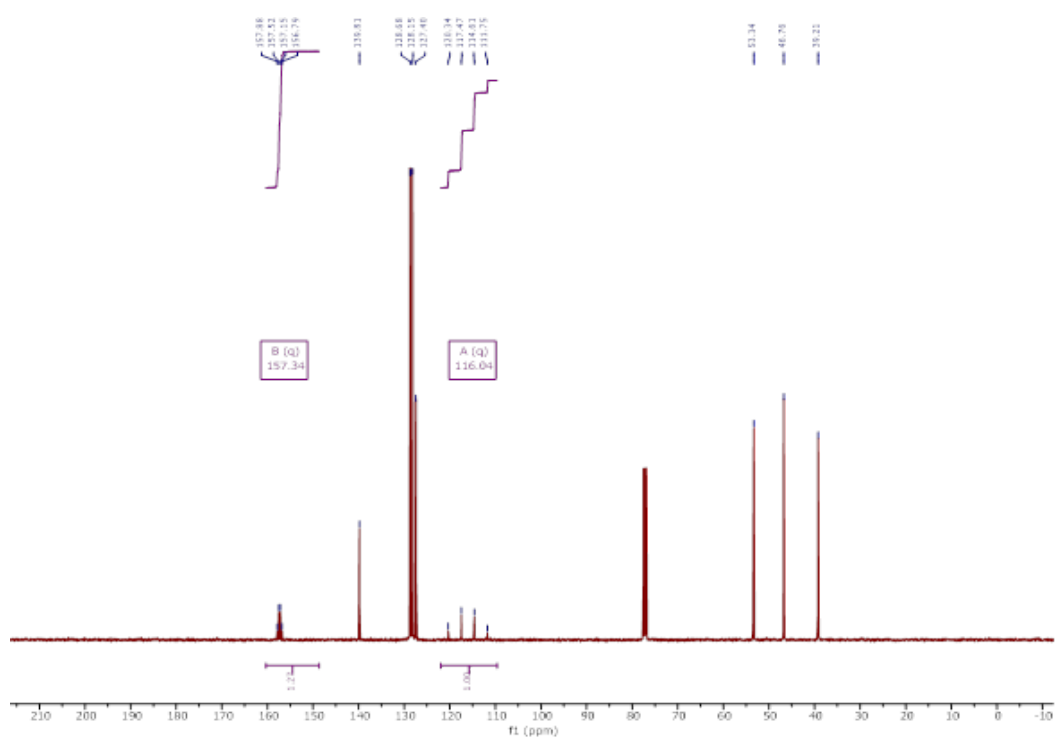

2ab *N*-Trifluoroacetyl-*N'*-(isopropylcarbamoyl)-*N'*-benzylethylenediamine (400 MHz, CDCl<sub>3</sub>)

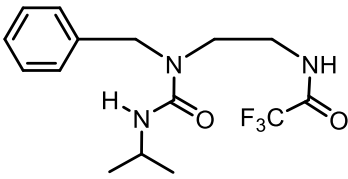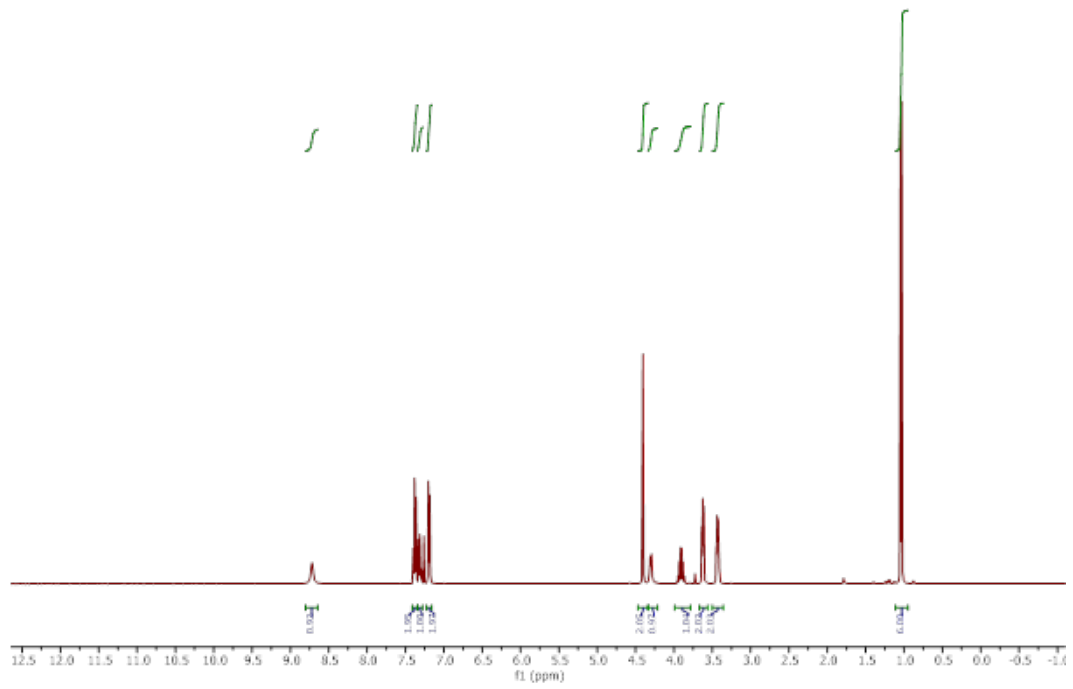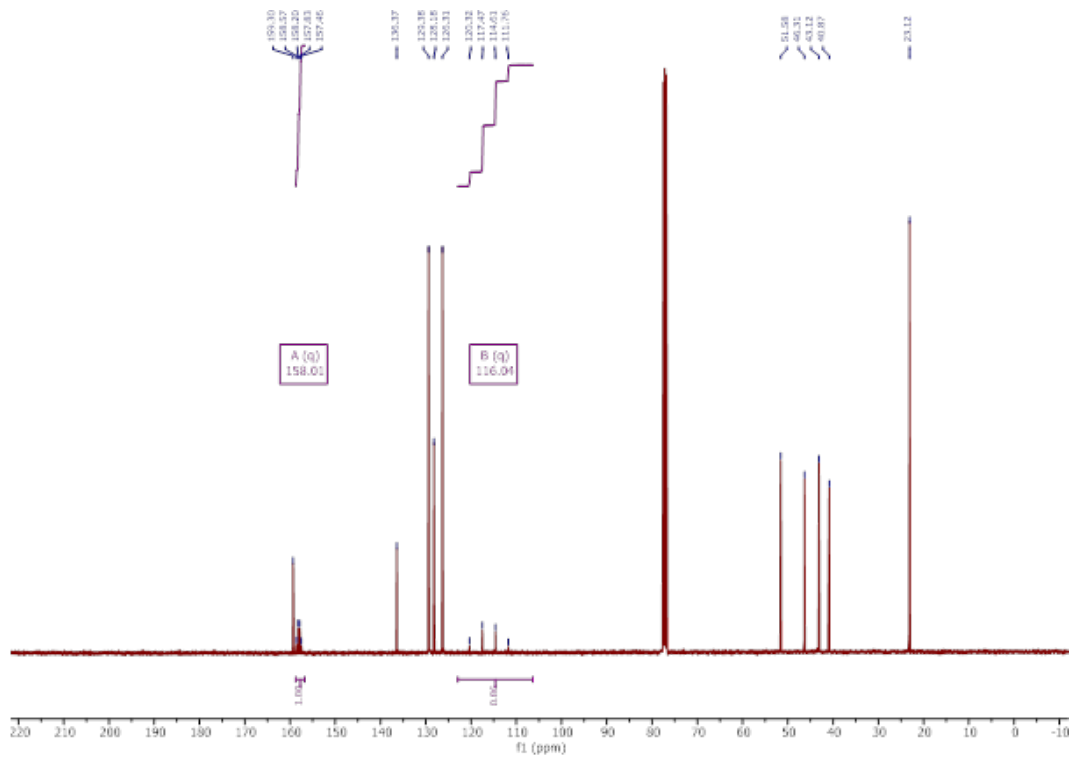

2bb *N*-Trifluoroacetyl-*N'*-(tertbutylcarbamoyl)-*N'*-benzylethylenediamine (400 MHz, CDCl<sub>3</sub>)

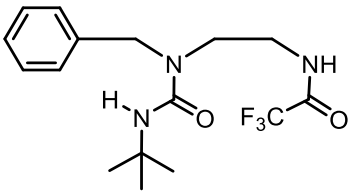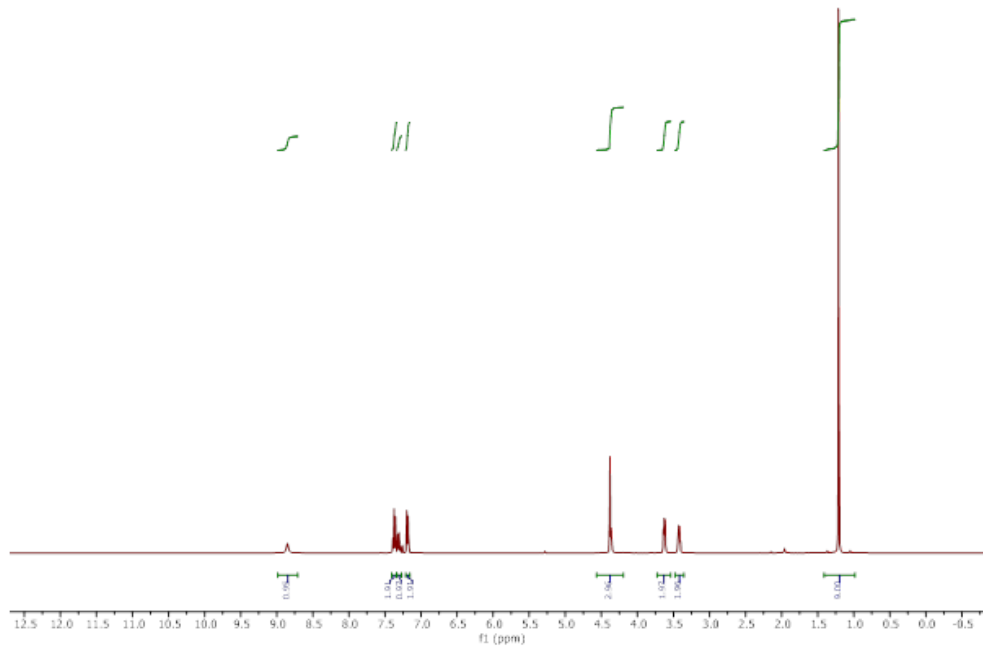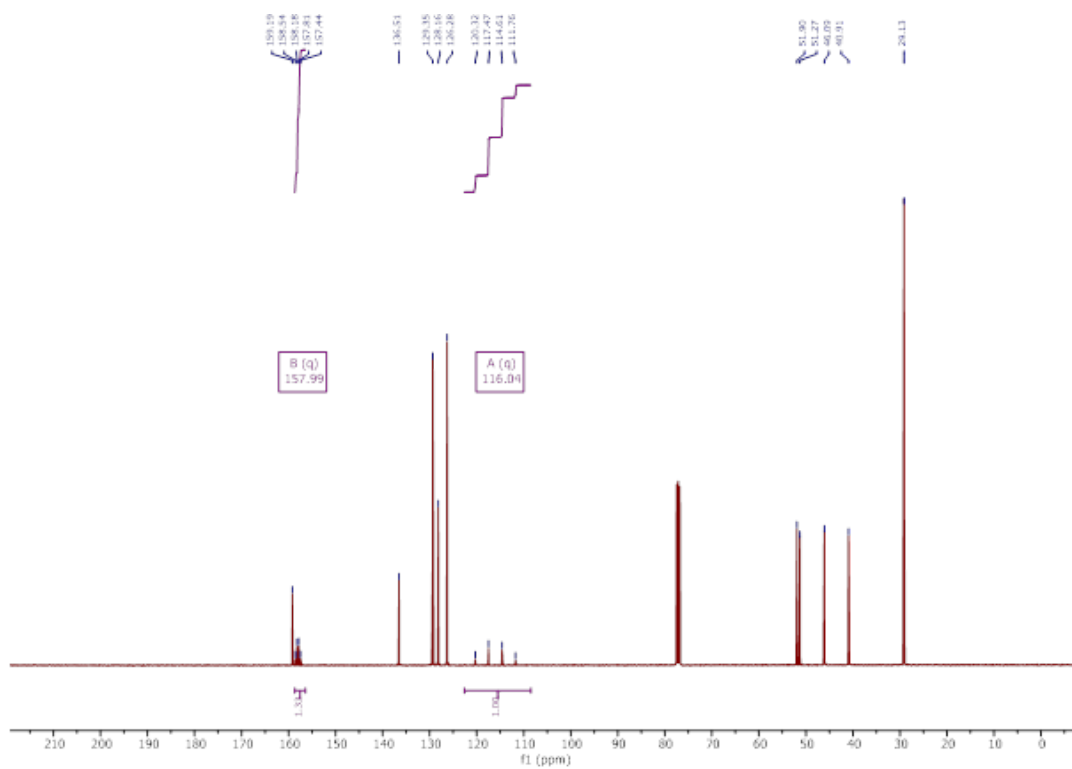



2cb *N*-trifluoroacetyl-*N'*-(phenylcarbamoyl)-*N'*-benzylethylenediamine (400 MHz, DMSO-d6)

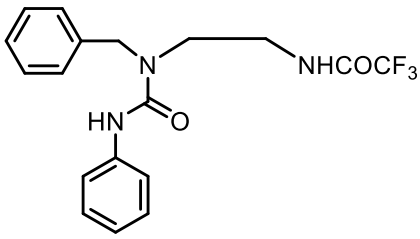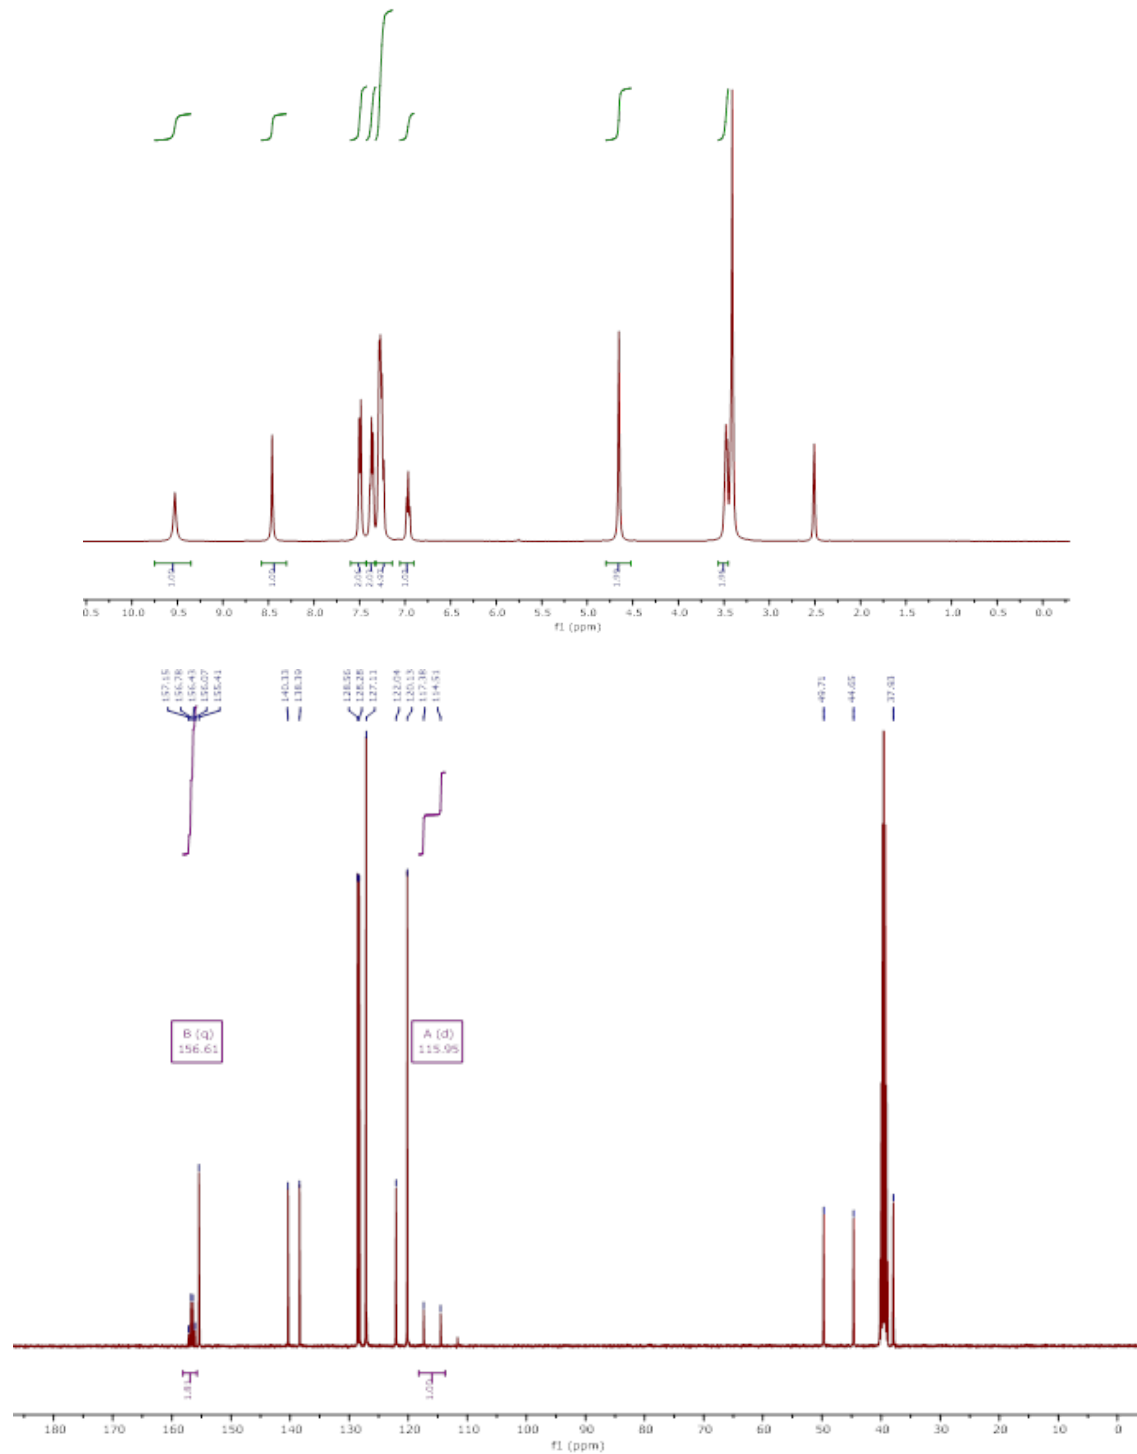

4ab *N*-trifluoroacetyl-*N'*-(isopropylcarbamoyl)-*N'*-ethylethylenediamine (400 MHz, CDCl<sub>3</sub>)

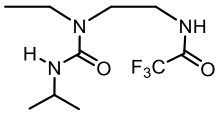

jc/dt9872 dtf10

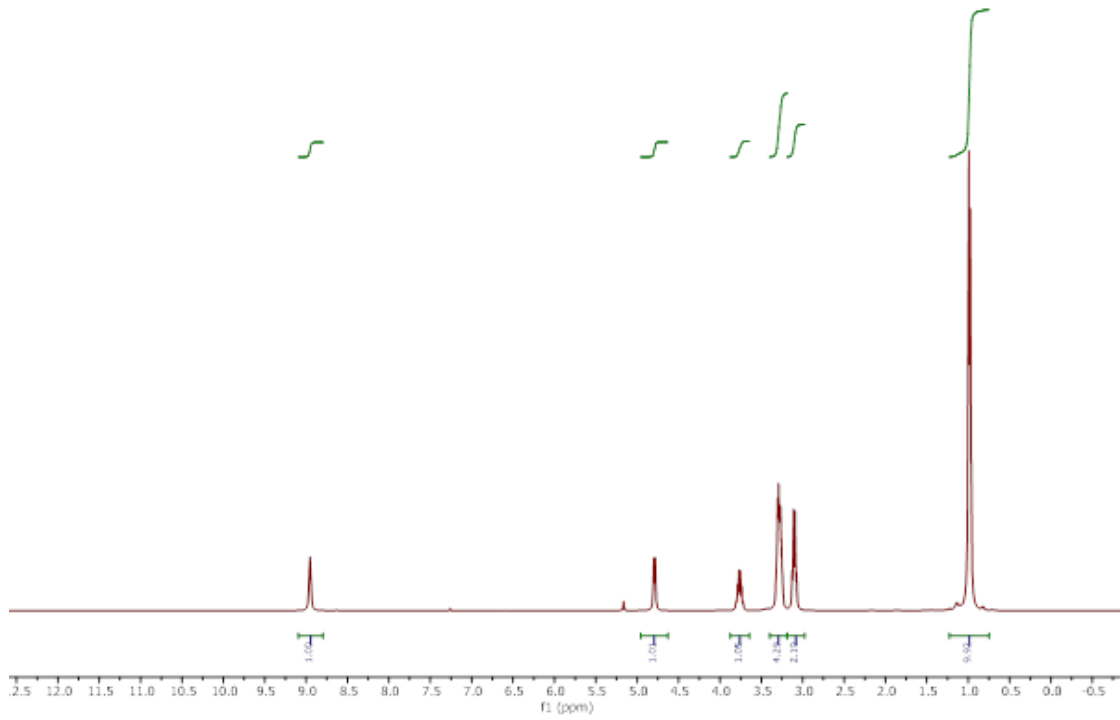

jc/dt9872 dtf10

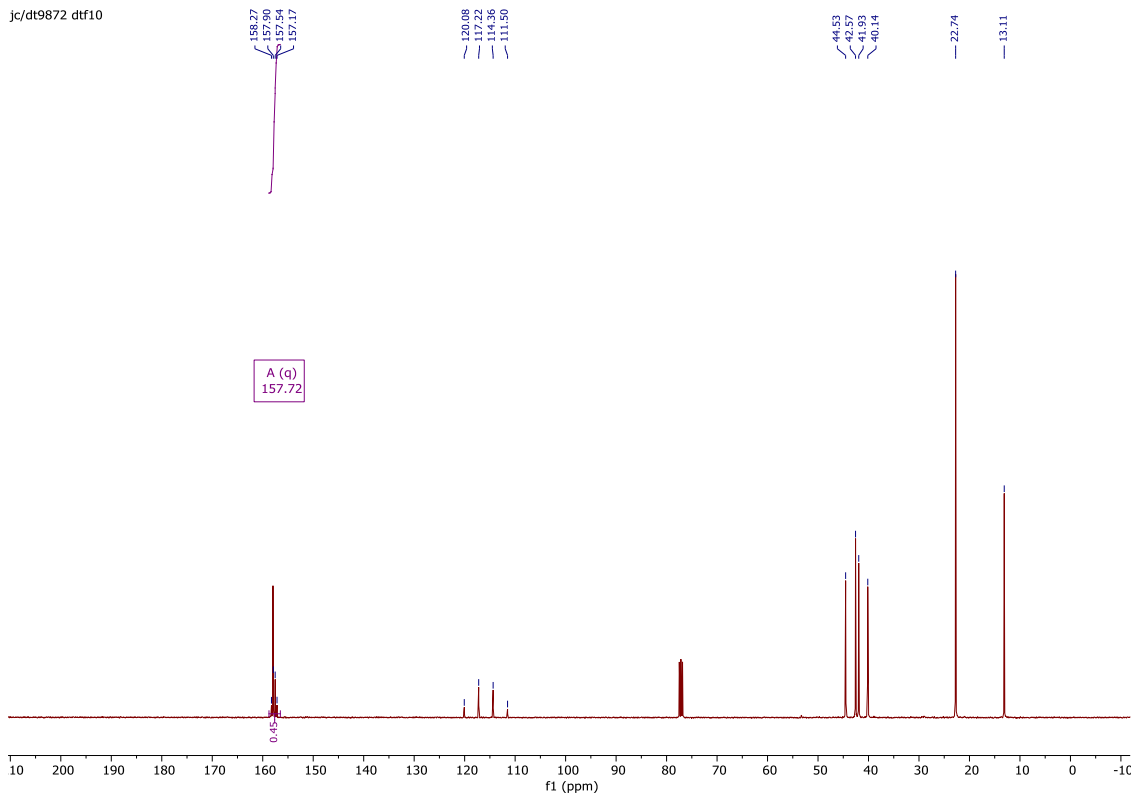

2ac *N*-(isopropylcarbamoyl)-*N*-benzylethylenediamine (400 MHz, CDCl<sub>3</sub>)

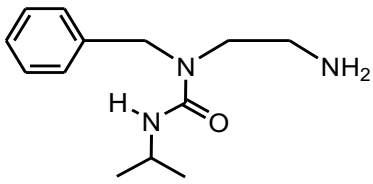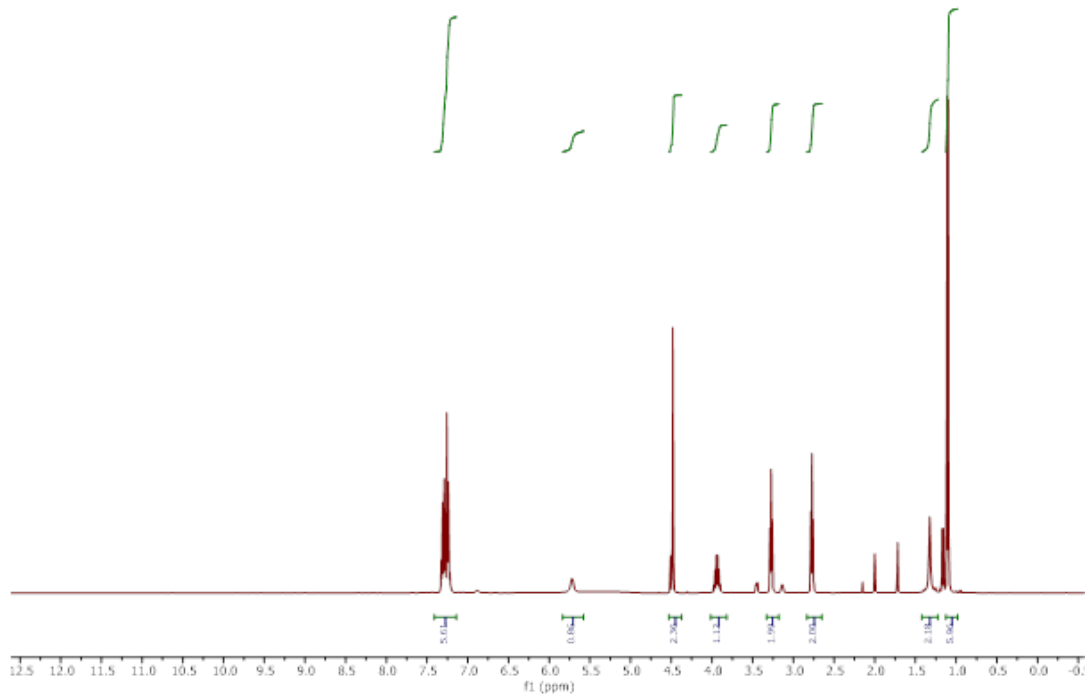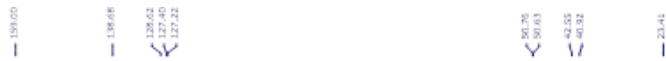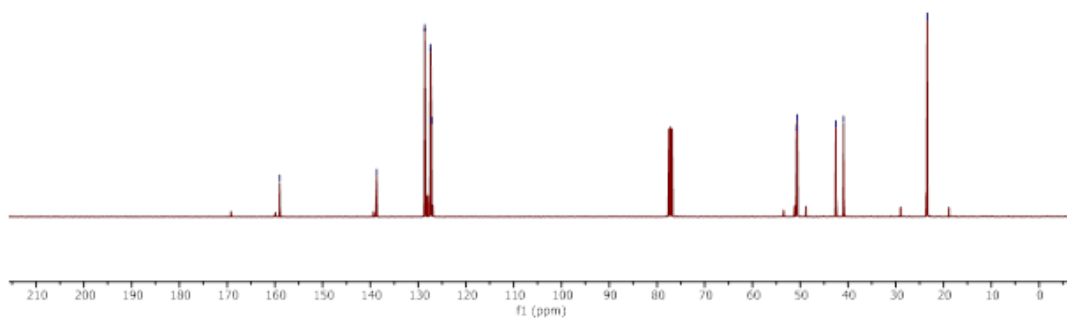

2bc *N*-(tertButylcarbamoyl)-*N*-benzylethylenediamine (400 MHz, CDCl<sub>3</sub>)

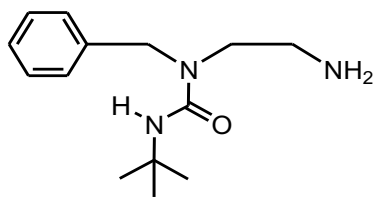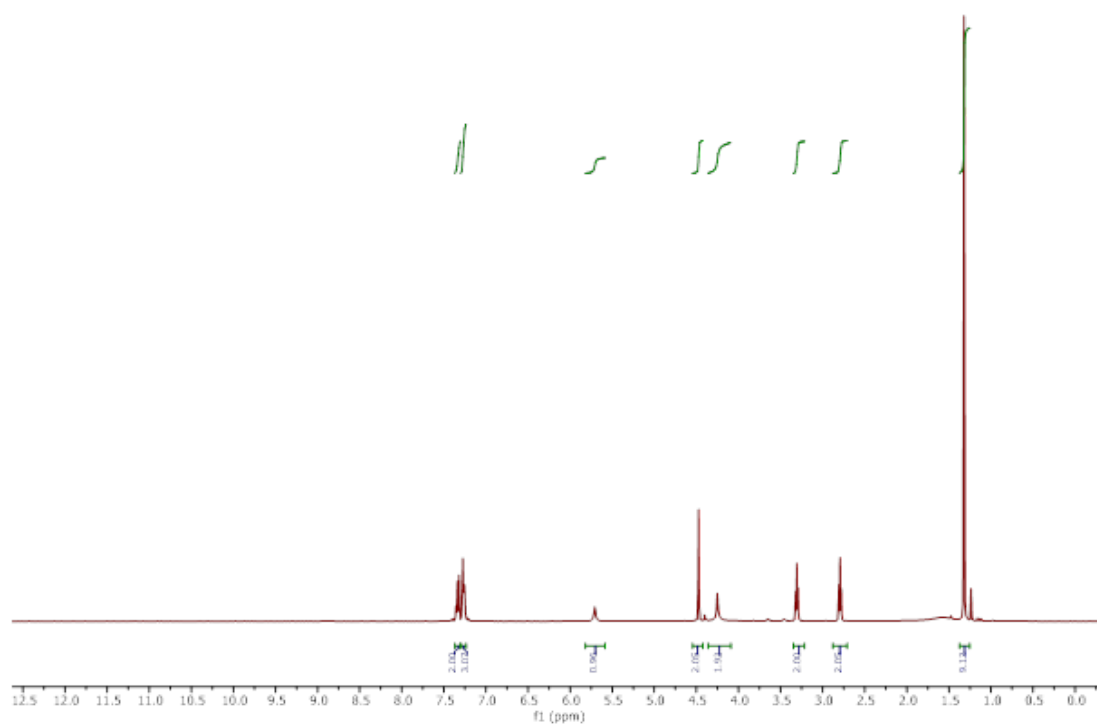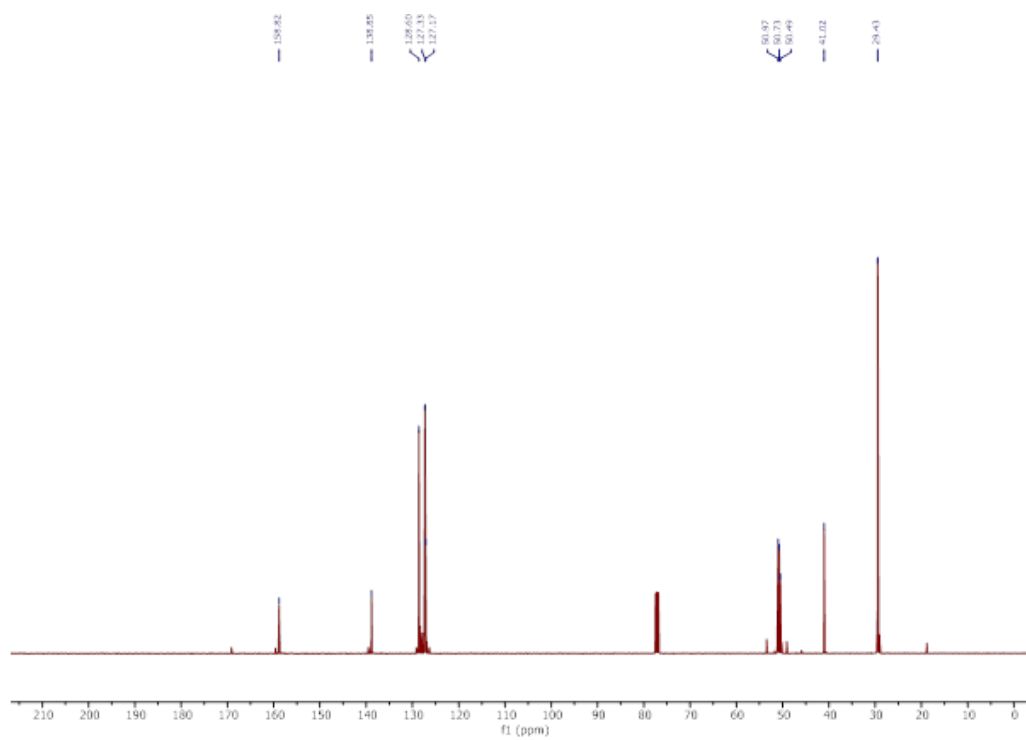

2cc *N*-(phenylcarbamoyl)-*N*-benzylethylenediamine (400 MHz, CDCl<sub>3</sub>)

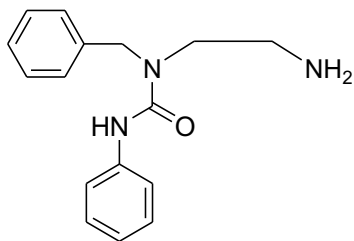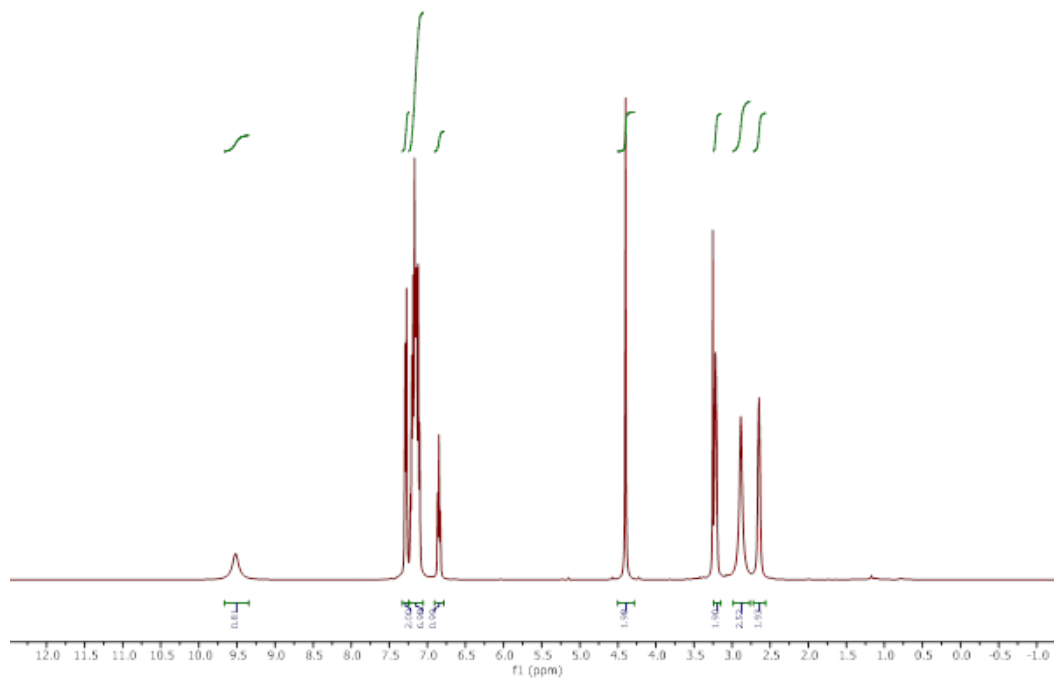

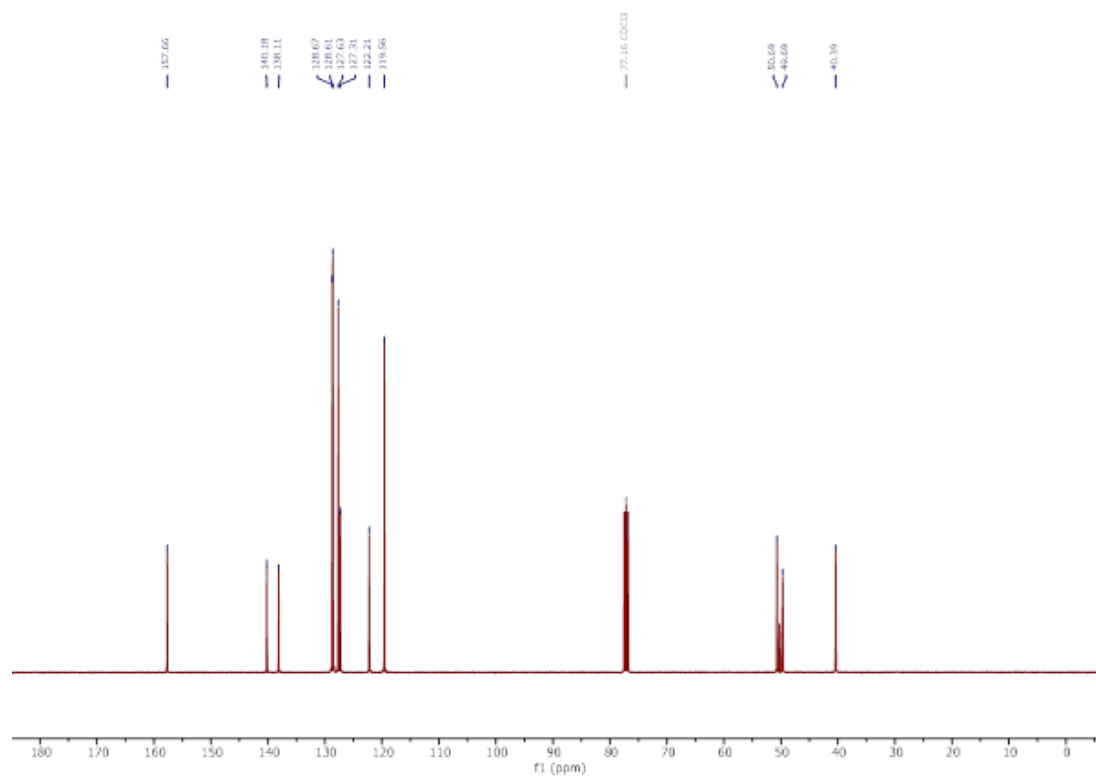

**4ac** *N*-(isopropylcarbamoyl)-*N*-ethylethylenediamine (400 MHz, CDCl<sub>3</sub>)

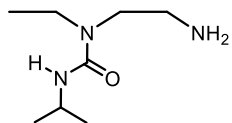

jc/d9881 df1108

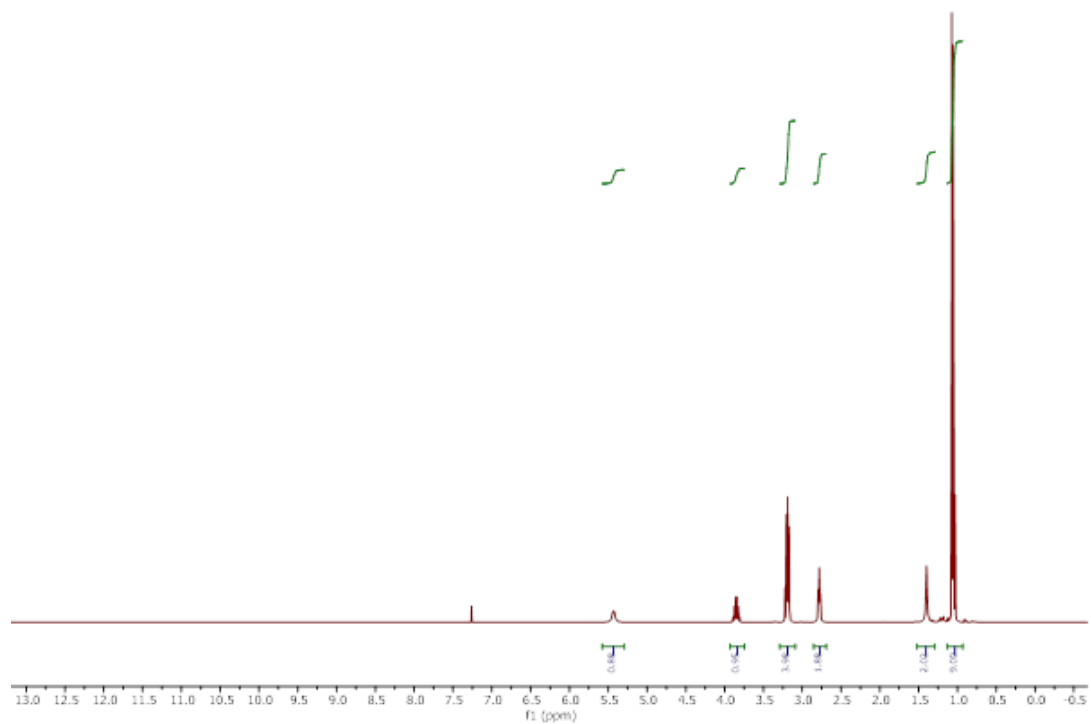

jc/d9881 df1108

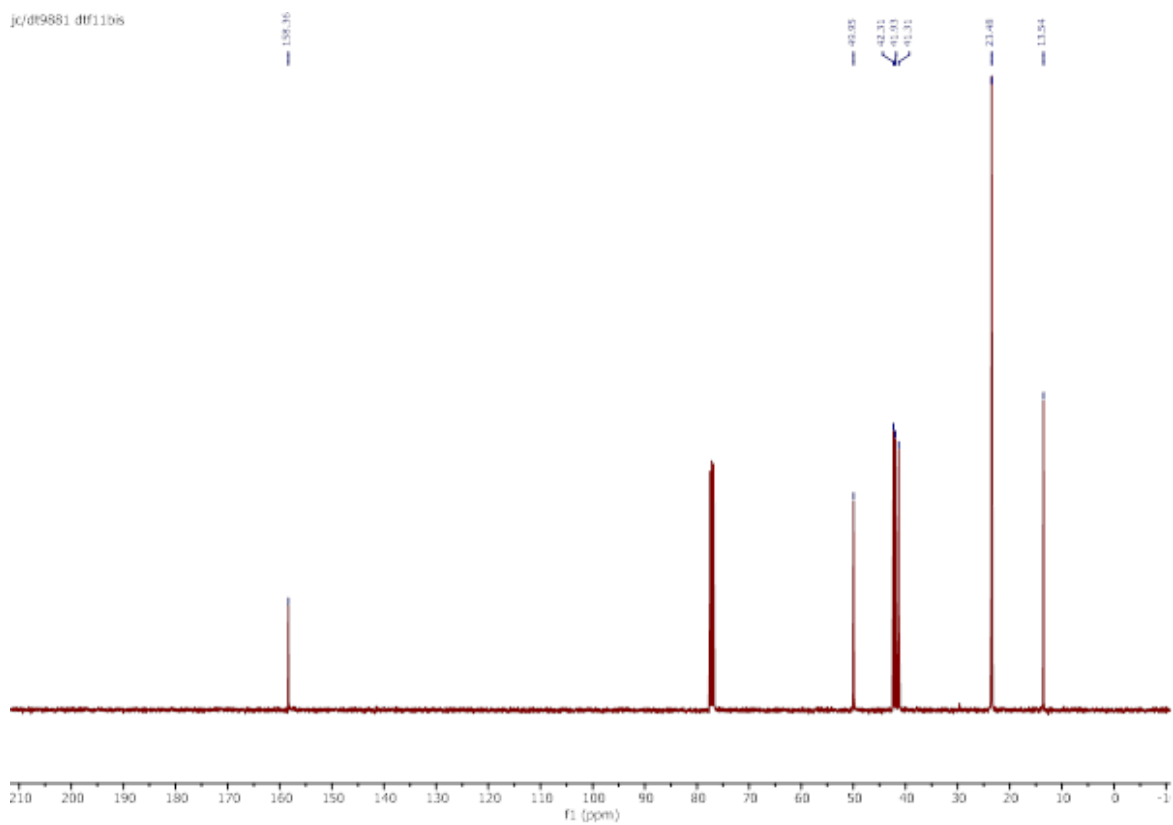

**2a** *N*-(3,5-bis(trifluoromethyl)phenylcarbonyl)-*N'*-(isopropylcarbonyl)-*N'*-benzylethylenediamine (400 MHz, CDCl<sub>3</sub>)

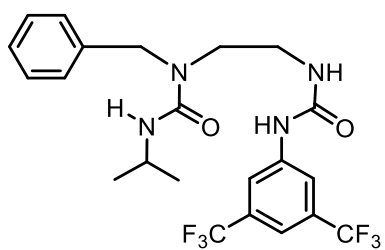

48234 dte153.10.fid

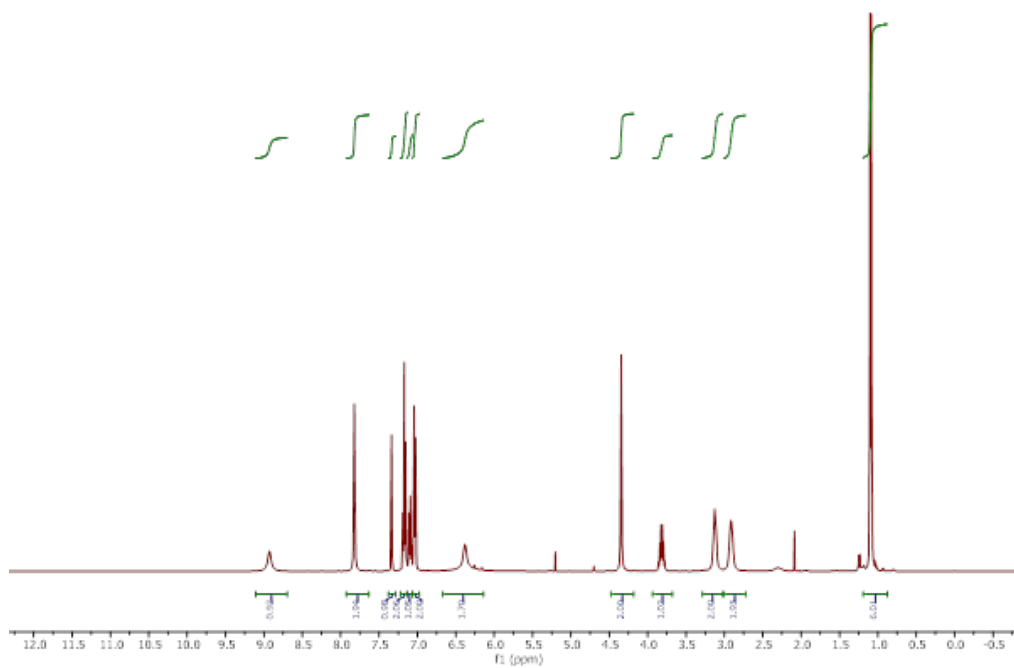

48234 dte153.12.fid

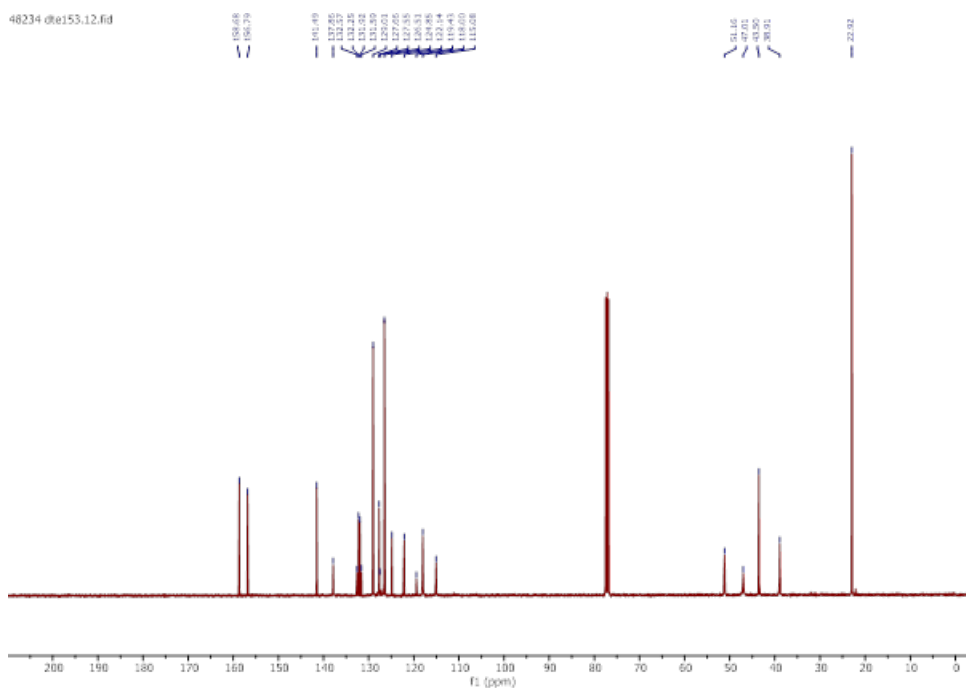

**2b** *N*-(3,5-bis(trifluoromethyl)phenyl)carbamoyl)-*N'*-(tertbutylcarbamoyl)-*N'*-benzylethylenediamine (400 MHz, CDCl<sub>3</sub>)



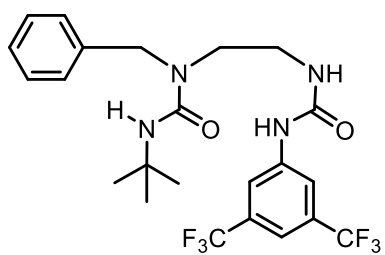

48235 dte154.10.fid

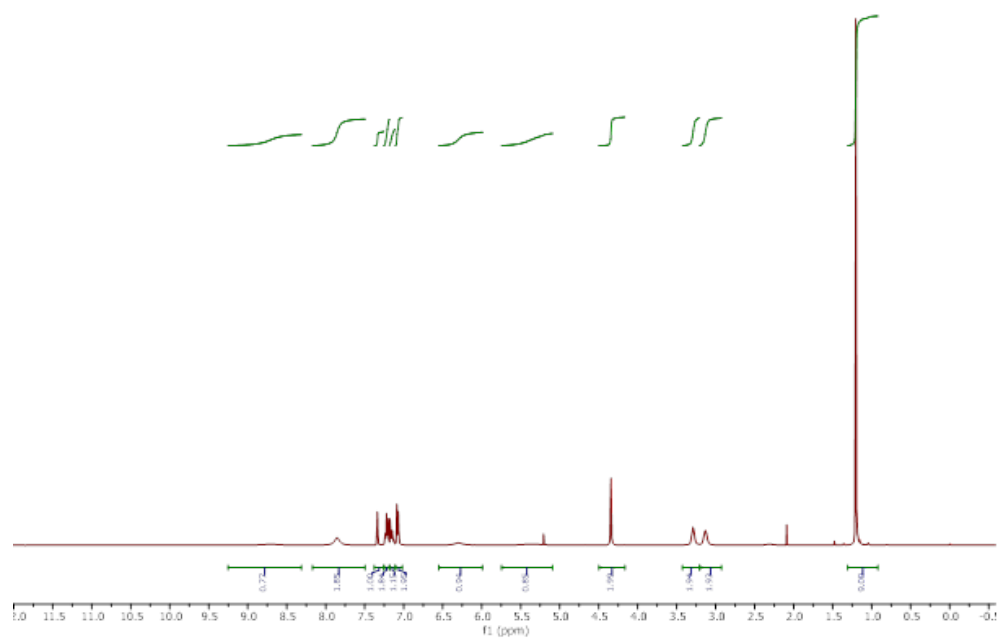

48235 dte154.12.fid

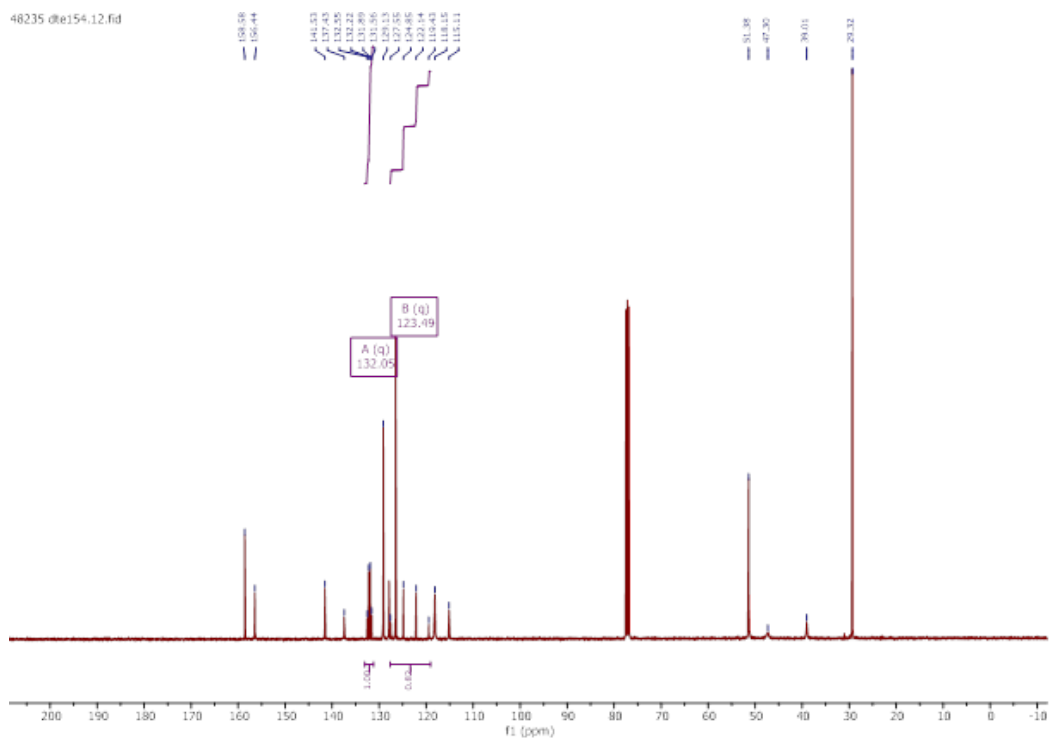

**2c *N*-(phenylcarbamoyl)-*N*-benzyl-*N'*-(3,5-bis(trifluoromethyl)phenylcarbamoyl)ethylenediamine (400 MHz, DMSO *d*<sub>6</sub>)**

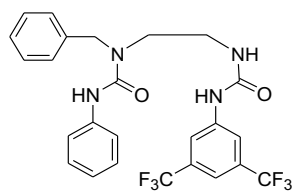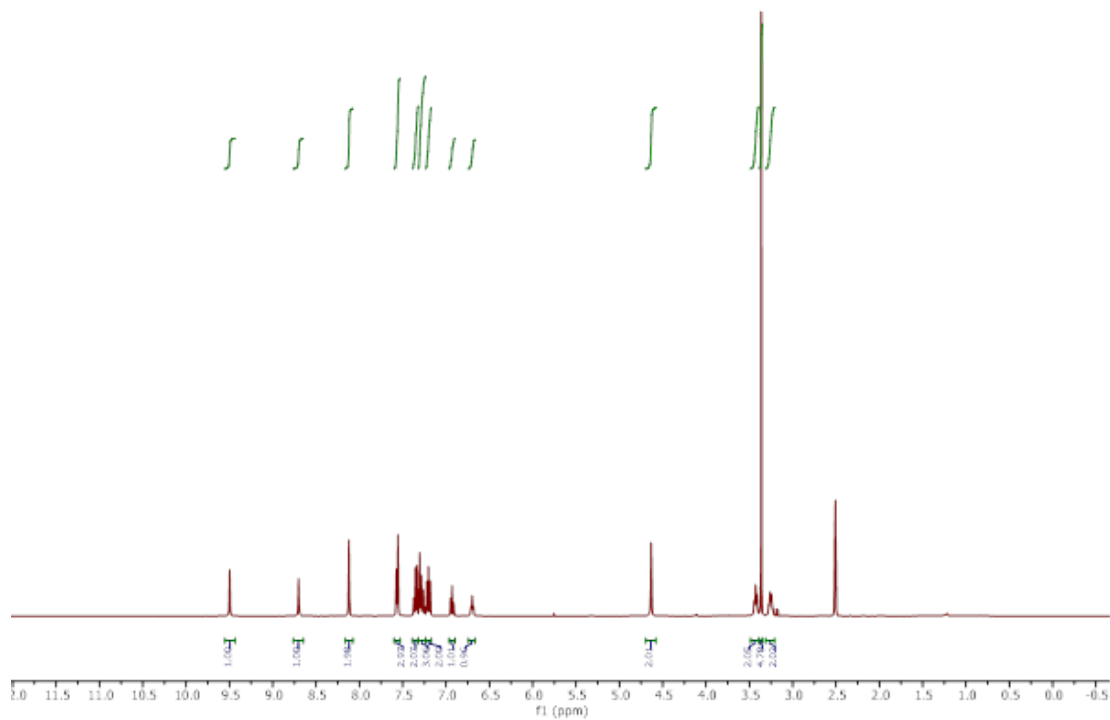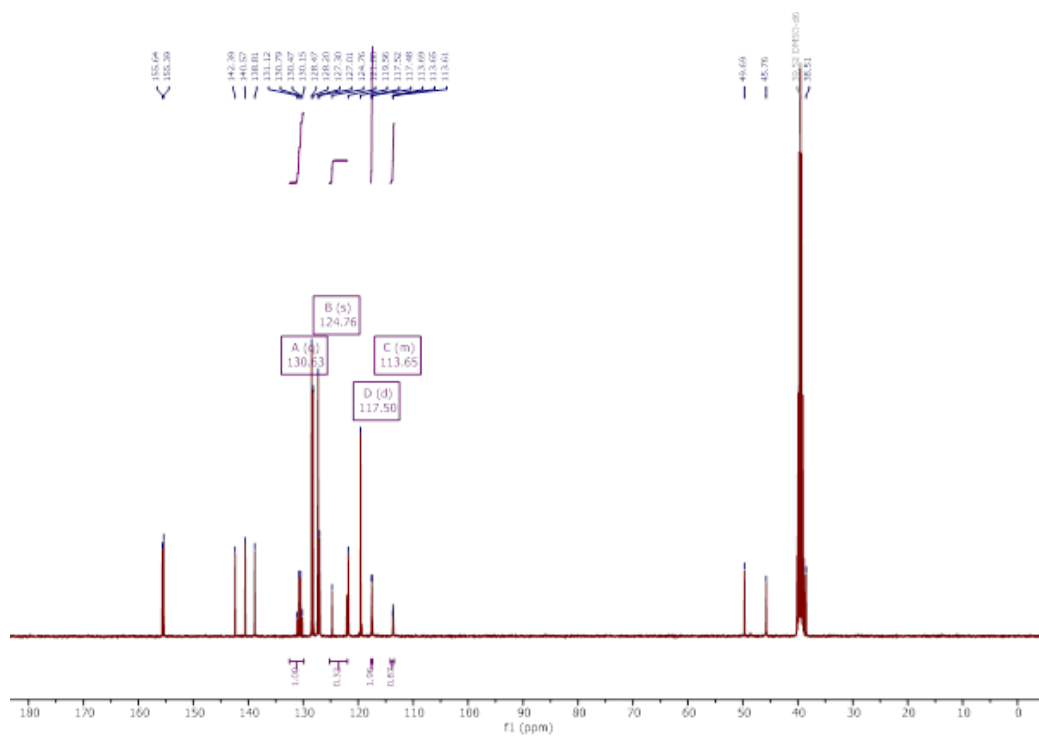

4a *N*-(3,5-bis(trifluoromethyl)phenylcarbamoyl)-*N'*-(isopropylcarbamoyl)-*N'*-ethylethylenediamine (400 MHz,  $\text{CDCl}_3$ )

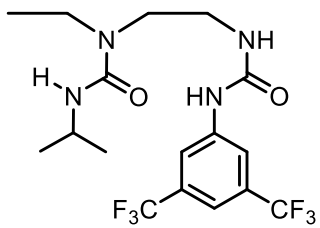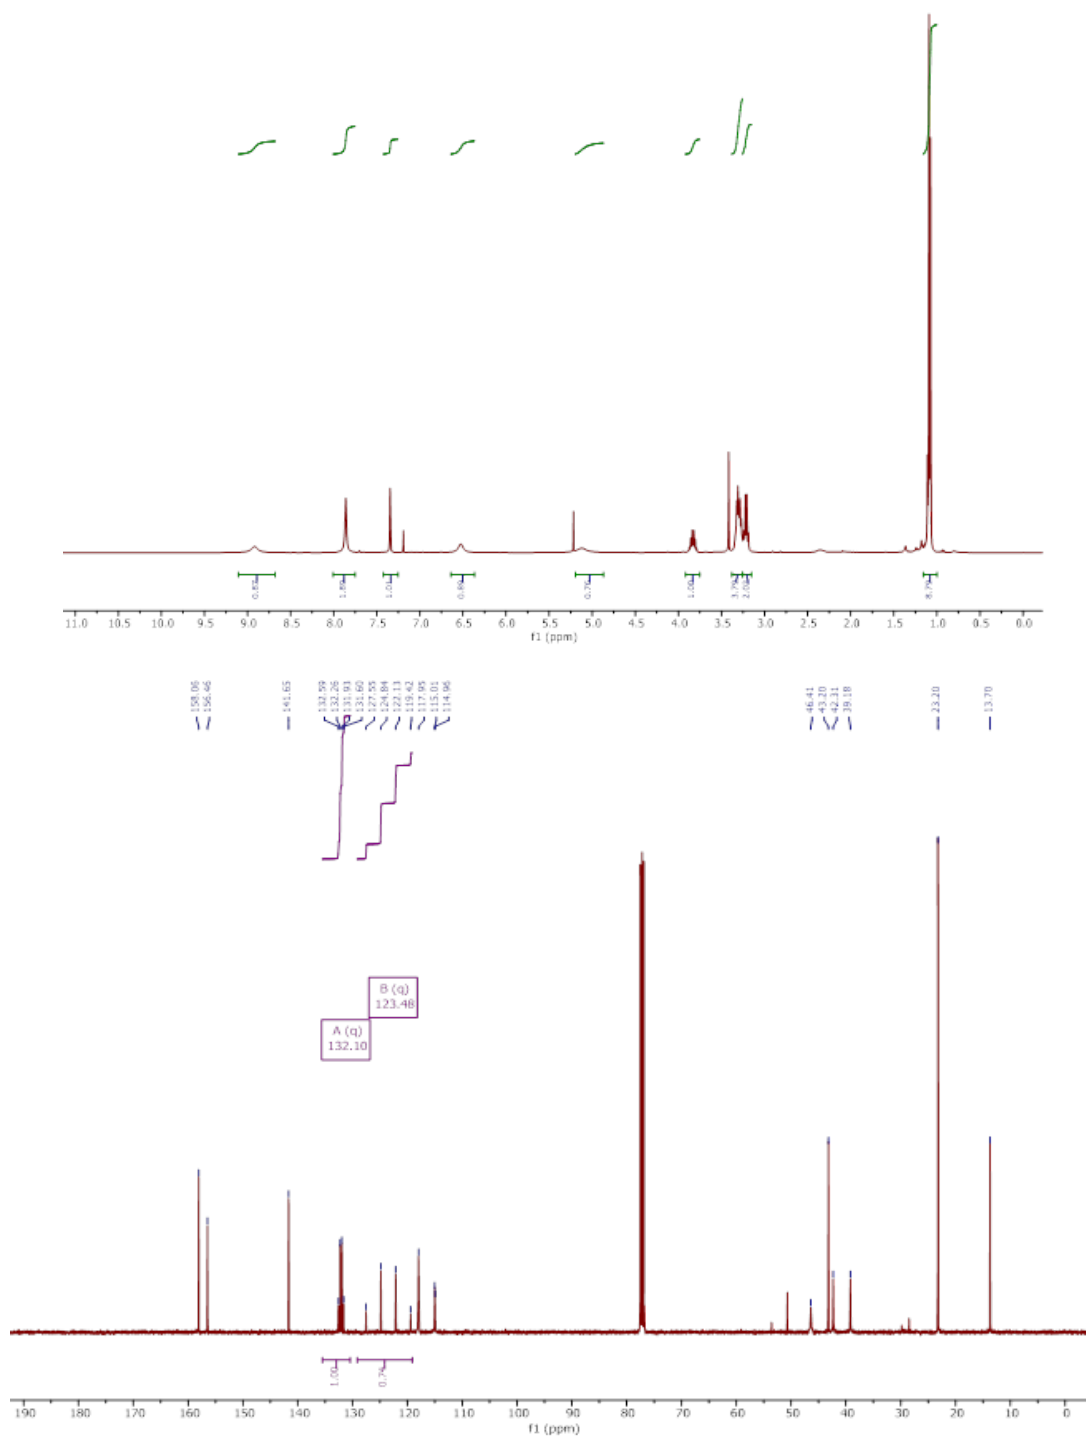

**4b** *N*-(3,5-bis(trifluoromethyl)phenyl)carbamoyl)-*N'*-(phenyl)carbamoyl)-*N'*-ethylethylenediamine (400 MHz, DMSO d<sub>6</sub>)

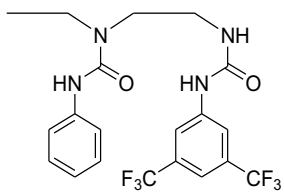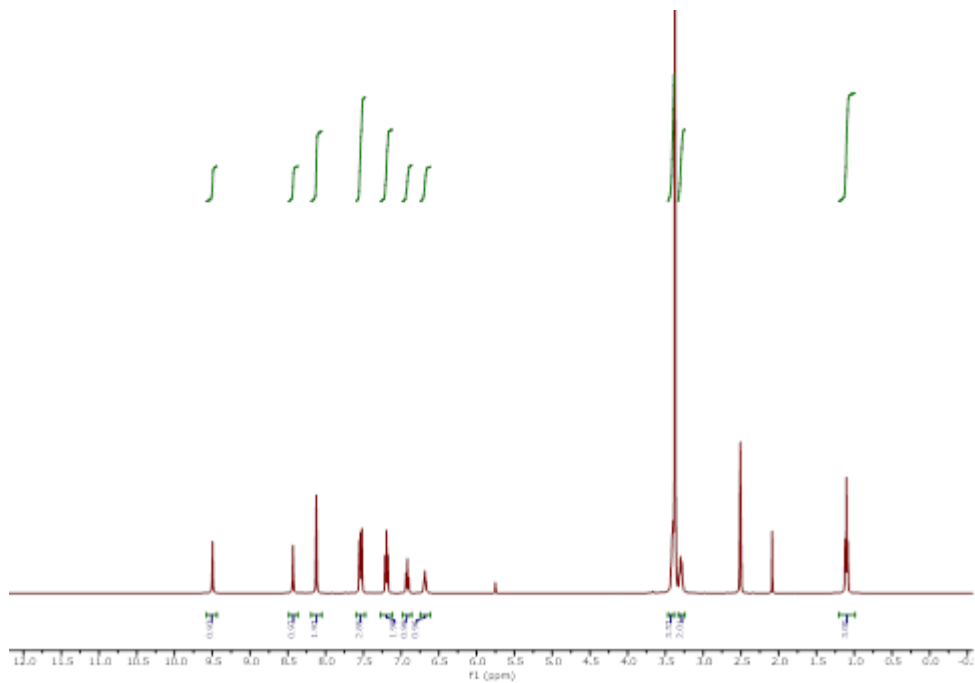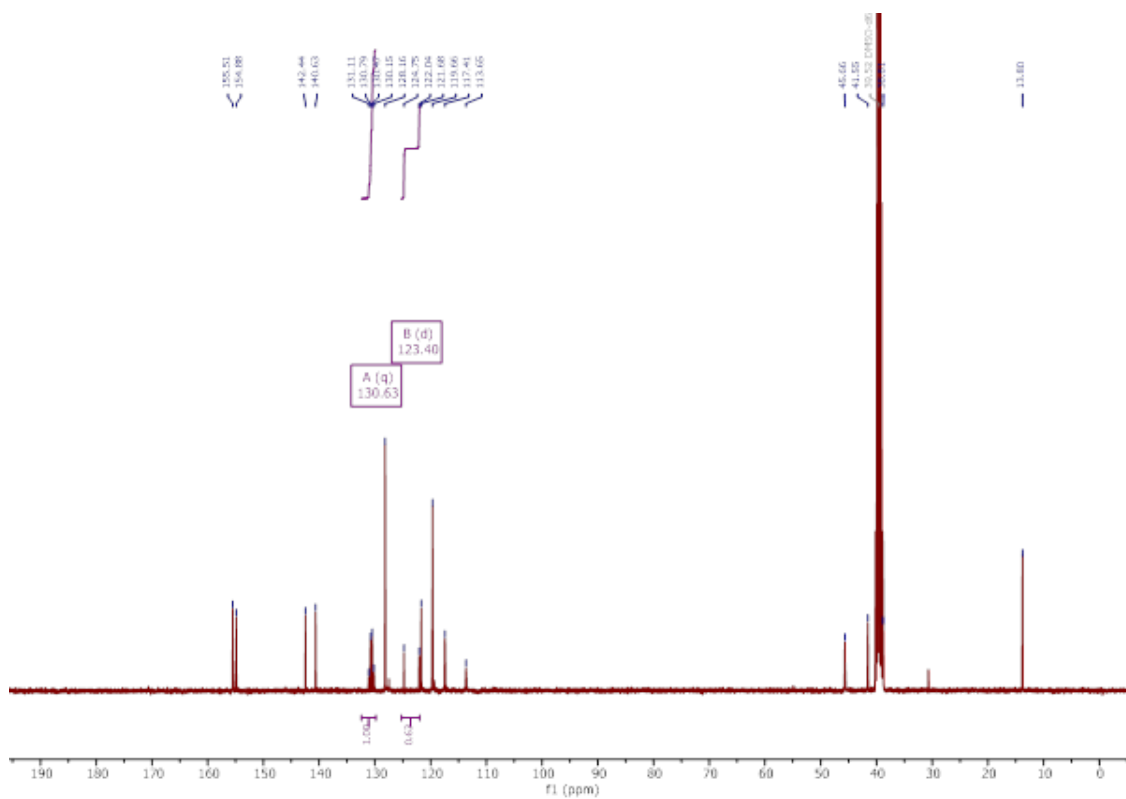

**1ba** *N*-(isopropylcarbamoyl)-*N*-benzyl-*N'*-(*tert*butoxycarbonyl)diethylenetriamine (400 MHz, CDCl<sub>3</sub>)

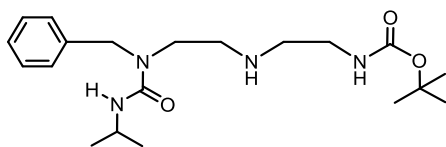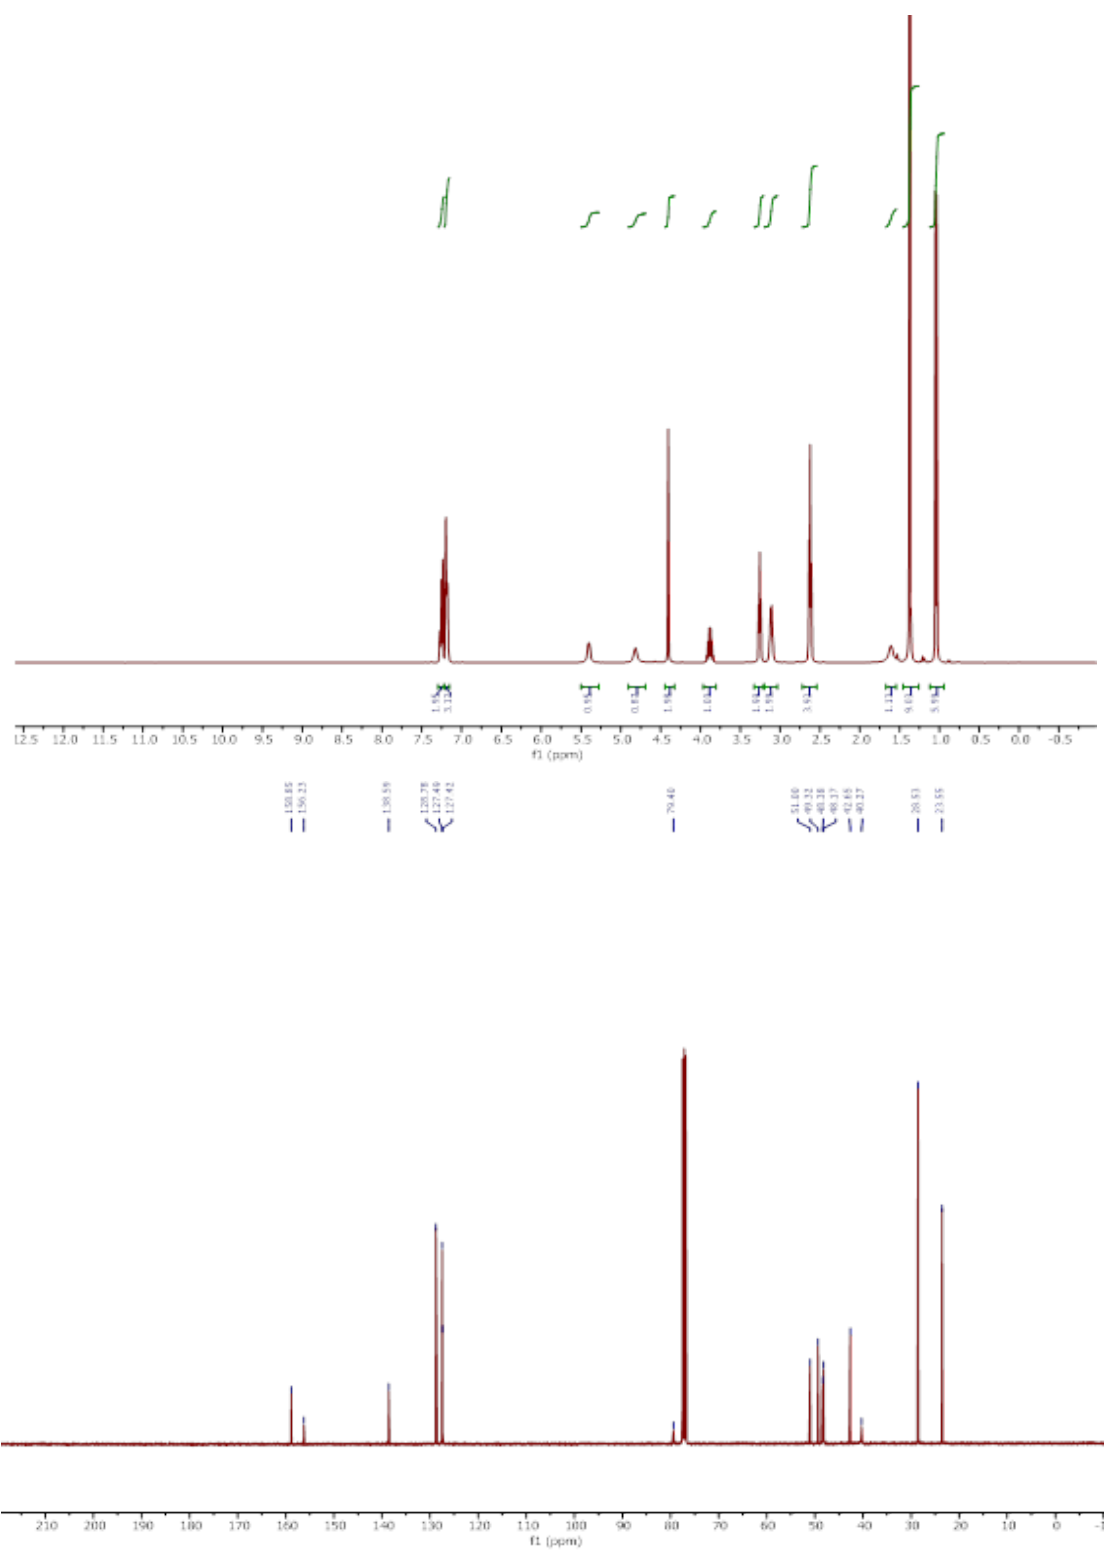

**1bb** *N*-(isopropylcarbamoyl)-*N*-benzyl-*N'*-(tertbutoxycarbonyl)-*N''*-(hexylcarbamoyl)diethylenetriamine (400 MHz, CDCl<sub>3</sub>)

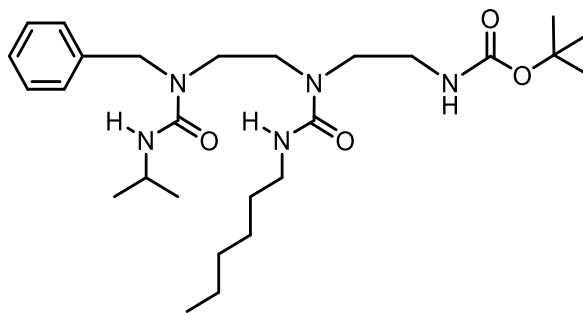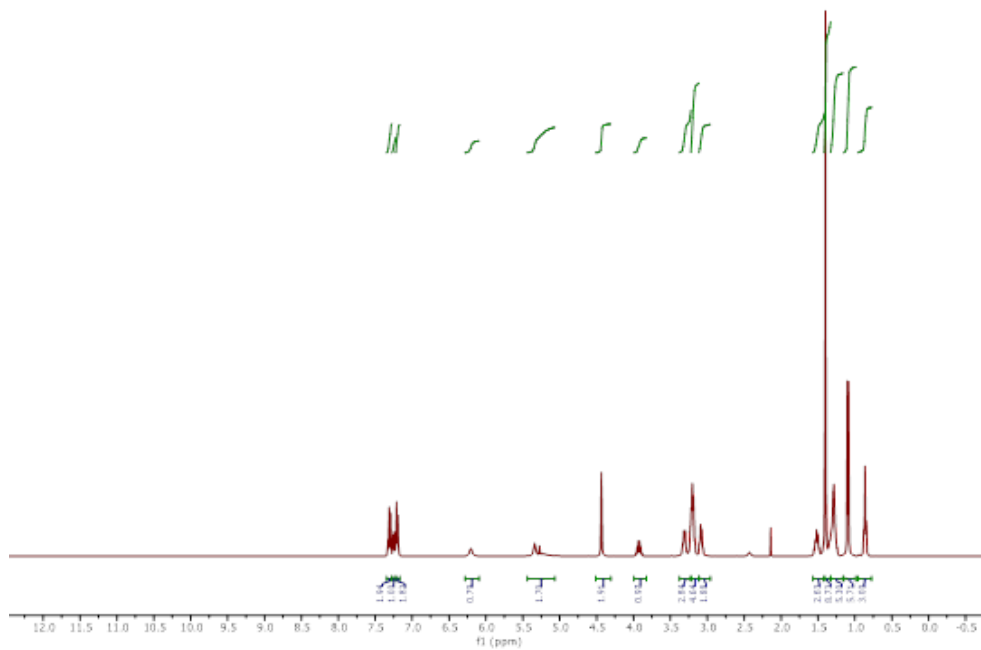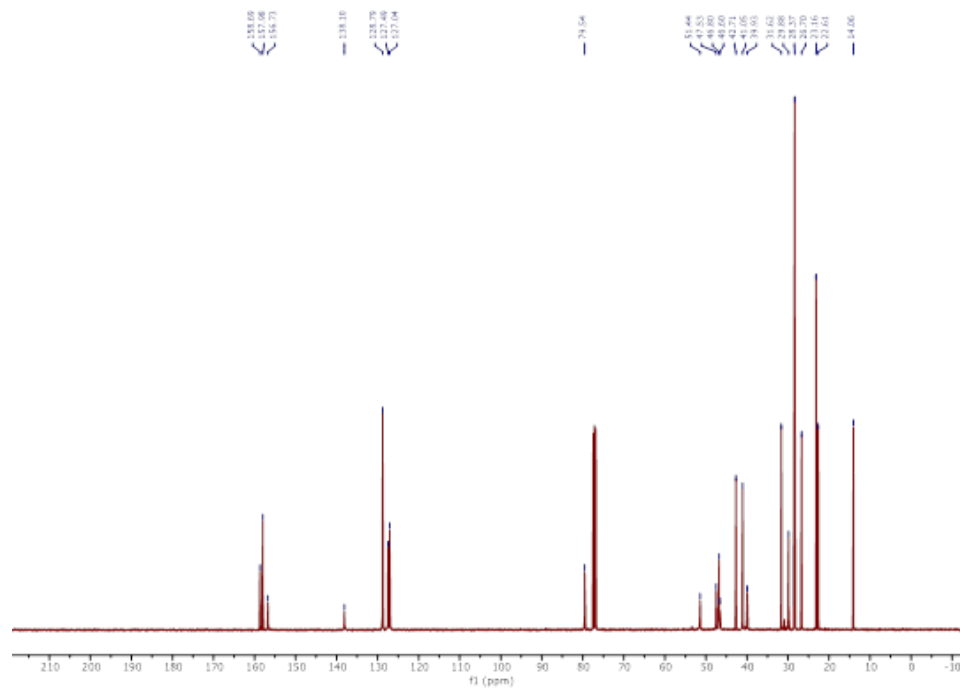

1cb *N*-(phenylcarbamoyl)-*N*-benzyl-*N'*-(tertbutoxycarbonyl)-*N''*-(butylcarbamoyl)diethylenetriamine (400 MHz, CDCl<sub>3</sub>)

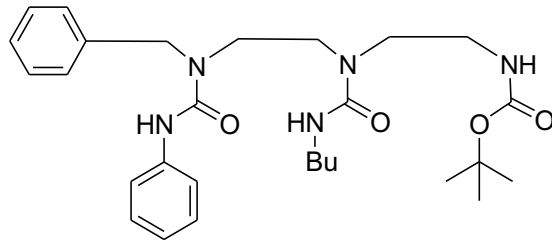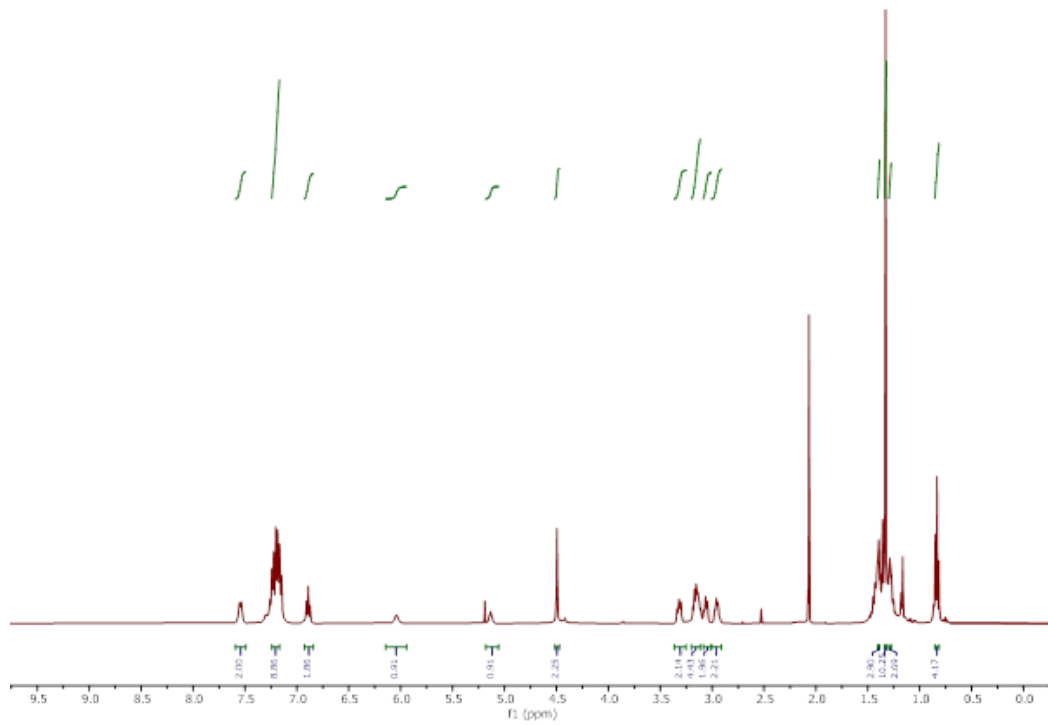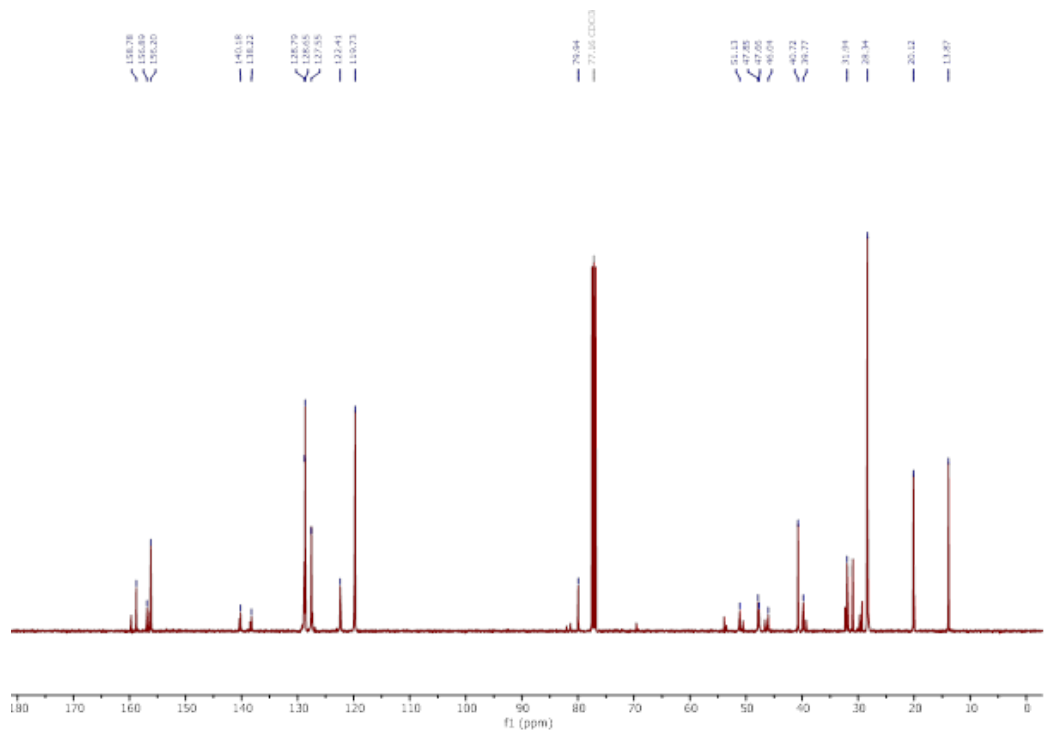

1bc *N*-(isopropylcarbonyl)-*N*-benzyl-*N'*-(hexylcarbonyl)diethylenetriamine (400 MHz, CDCl<sub>3</sub>)

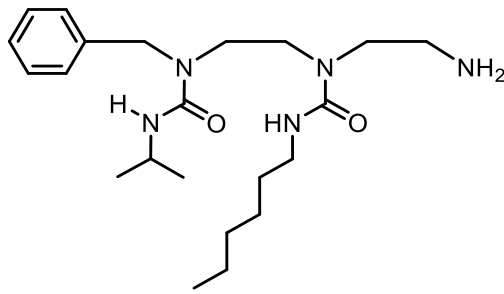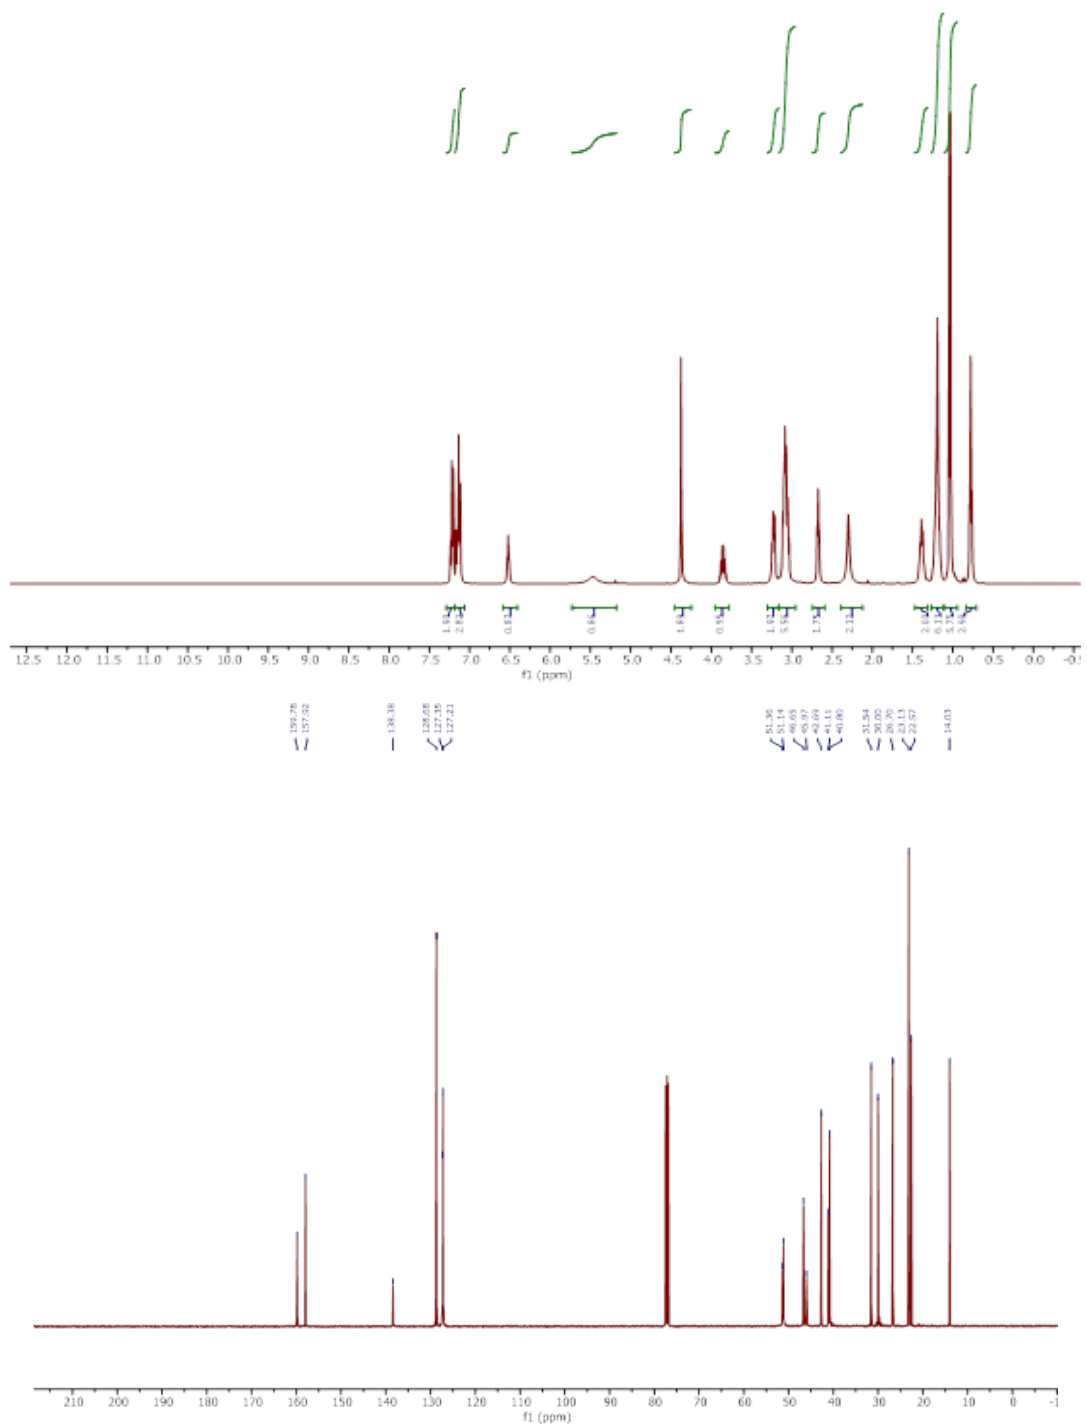



1cc *N*-(phenylcarbamoyl)-*N*-benzyl-*N'*-(butylcarbamoyl)diethylenetriamine (400 MHz, CDCl<sub>3</sub>)

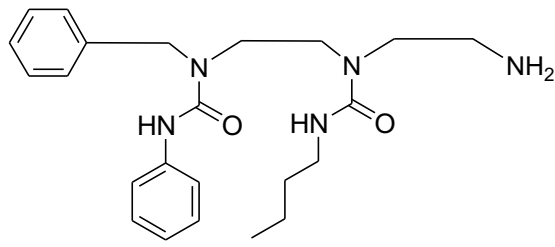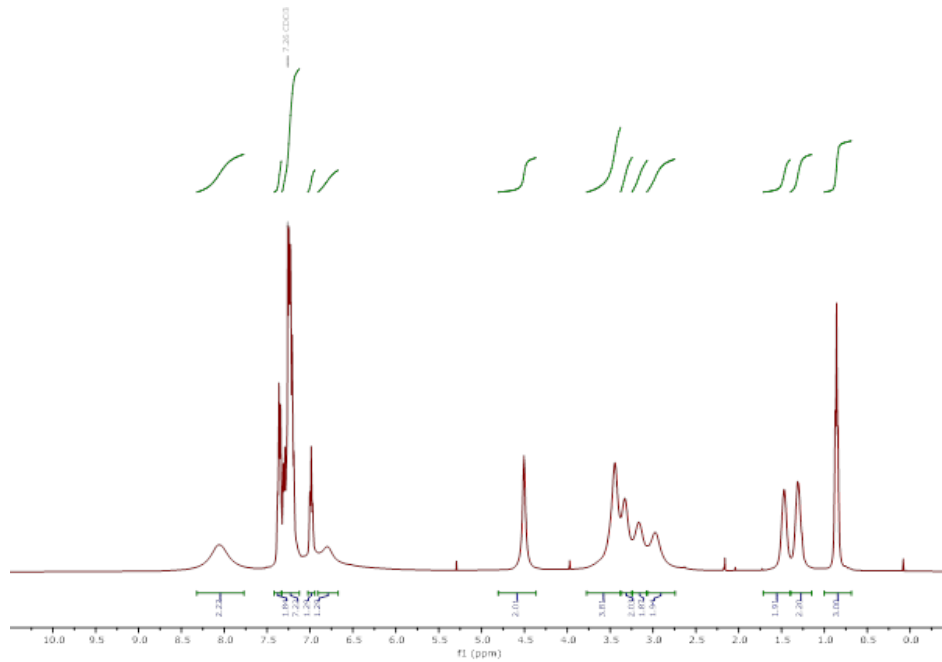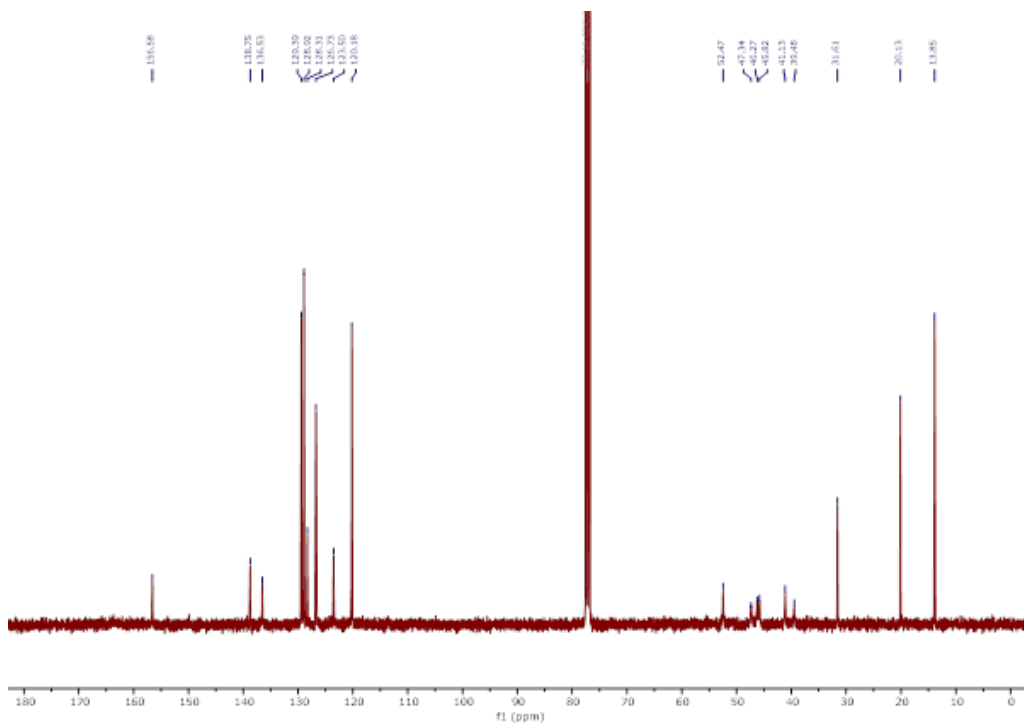

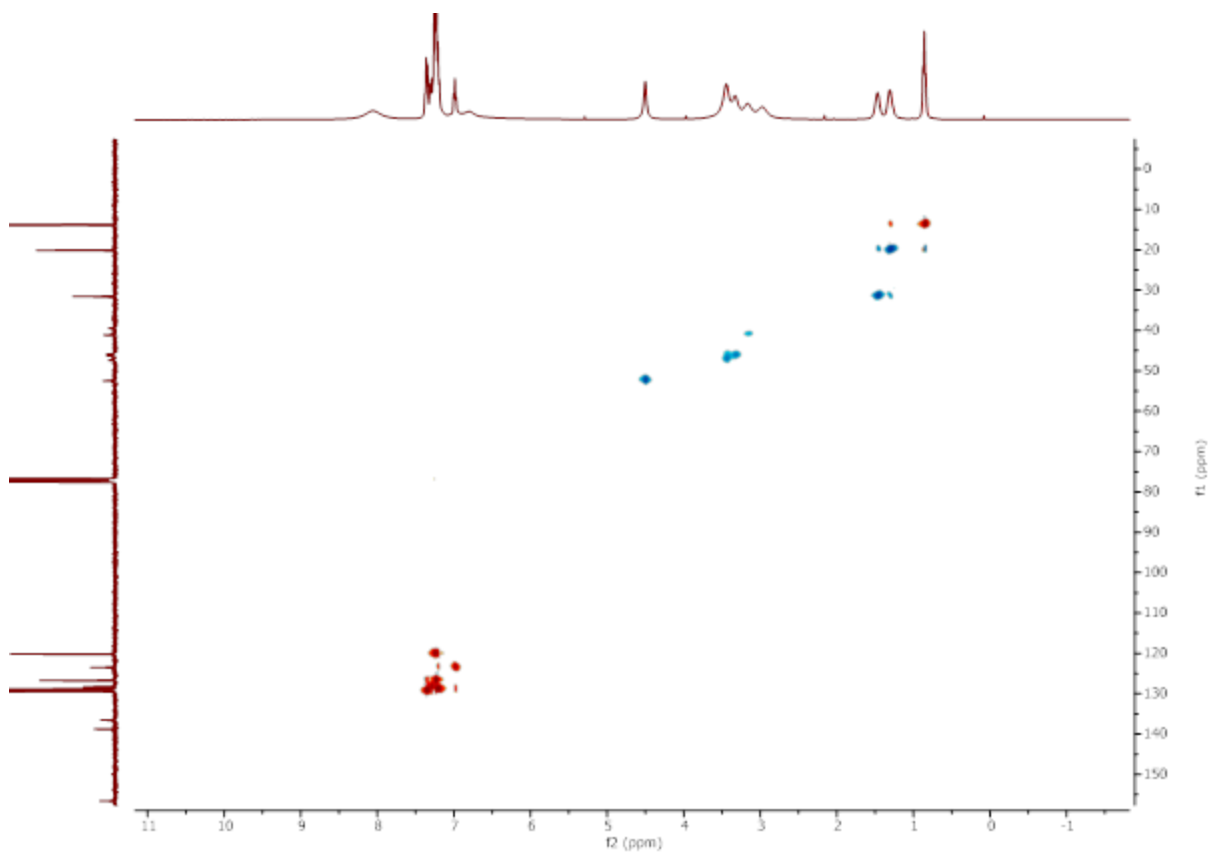

1b

***N***-(isopropylcarbamoyl)-***N***-benzyl-***N'***-(hexylcarbamoyl)-***N'***-(3,5-bis(trifluoromethyl)phenylcarbamoyl)diethylenetriamine (400 MHz, CDCl<sub>3</sub>)

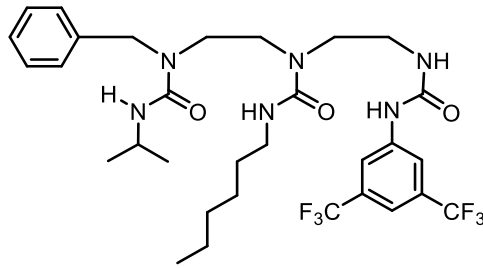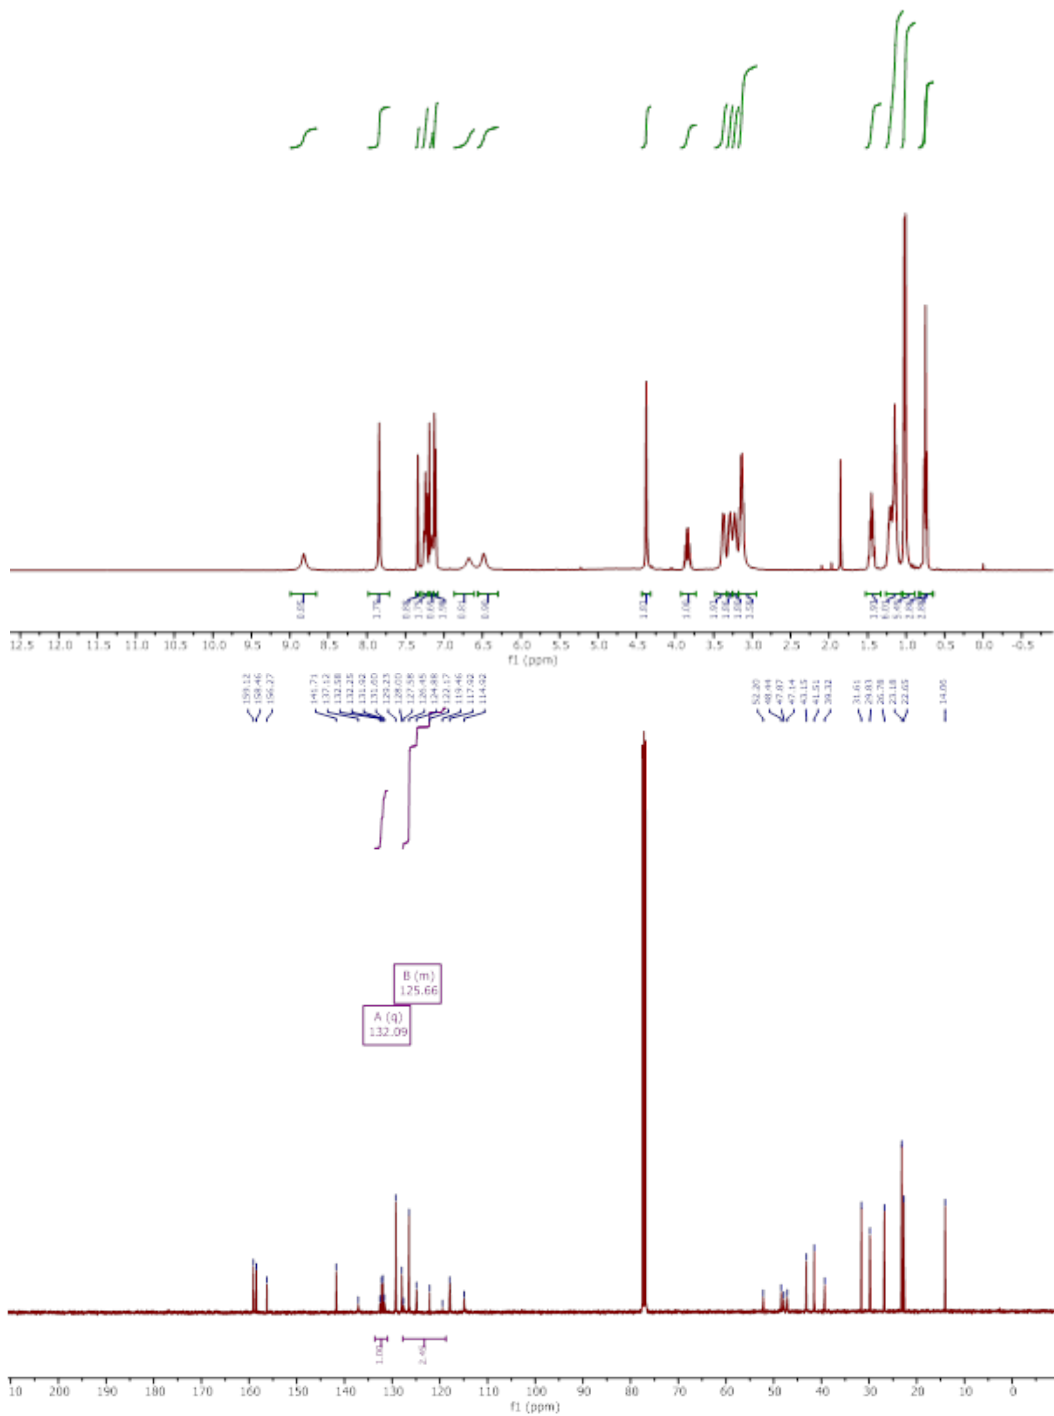

1c

*N*-(phenylcarbamoyl)-*N*-benzyl-*N'*-(butylcarbamoyl)-*N'*-(3,5-bis(trifluoromethyl)phenylcarbamoyl)diethylenetriamine (400 MHz, CDCl<sub>3</sub>)

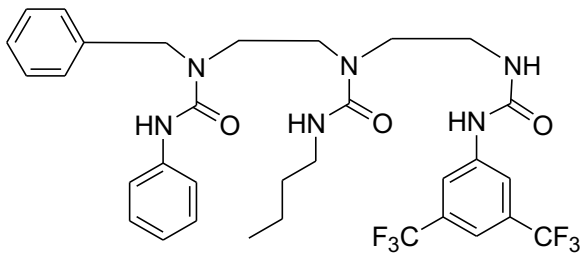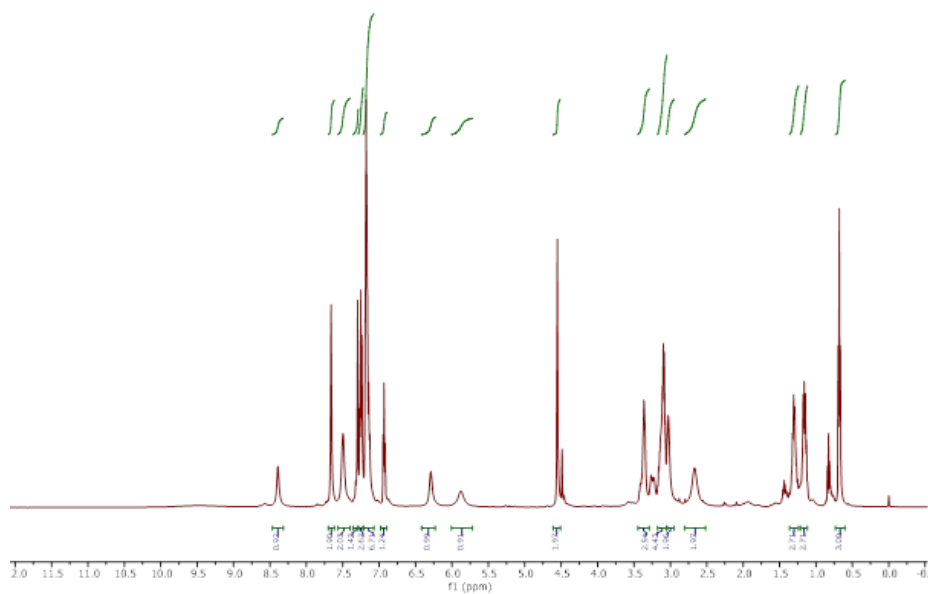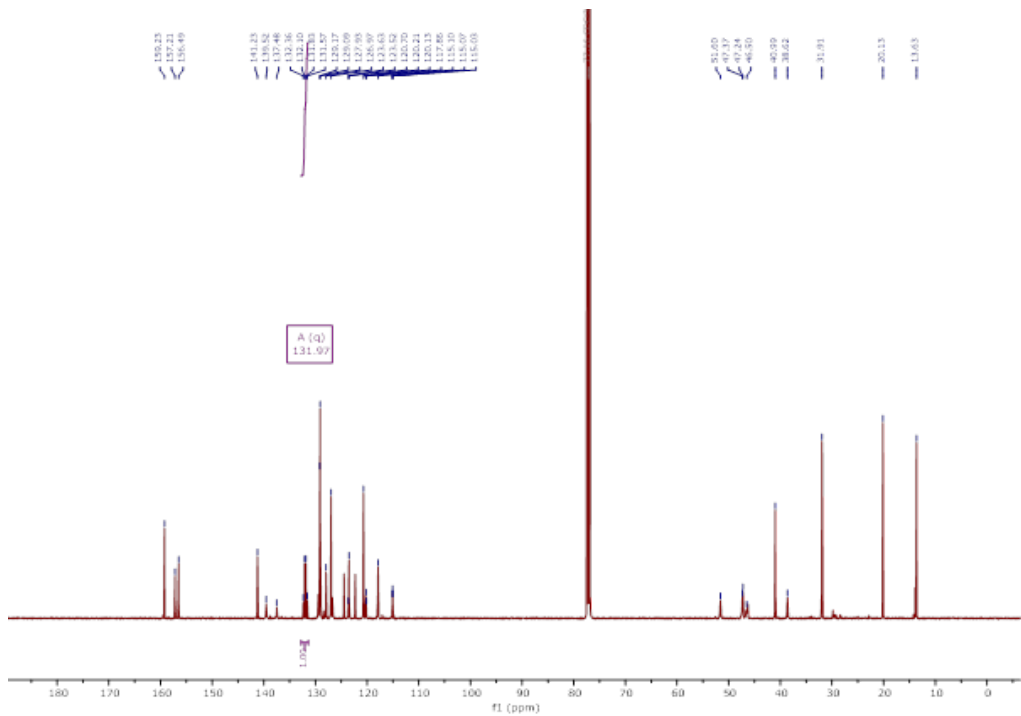

1aa *N*-benzyl-*N'*-(*tert*butoxycarbonyl)diethylenetriamine (400 MHz, CDCl<sub>3</sub>)

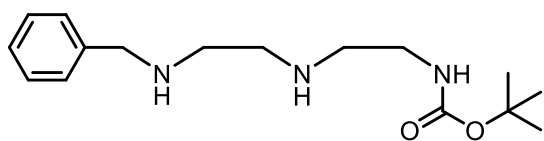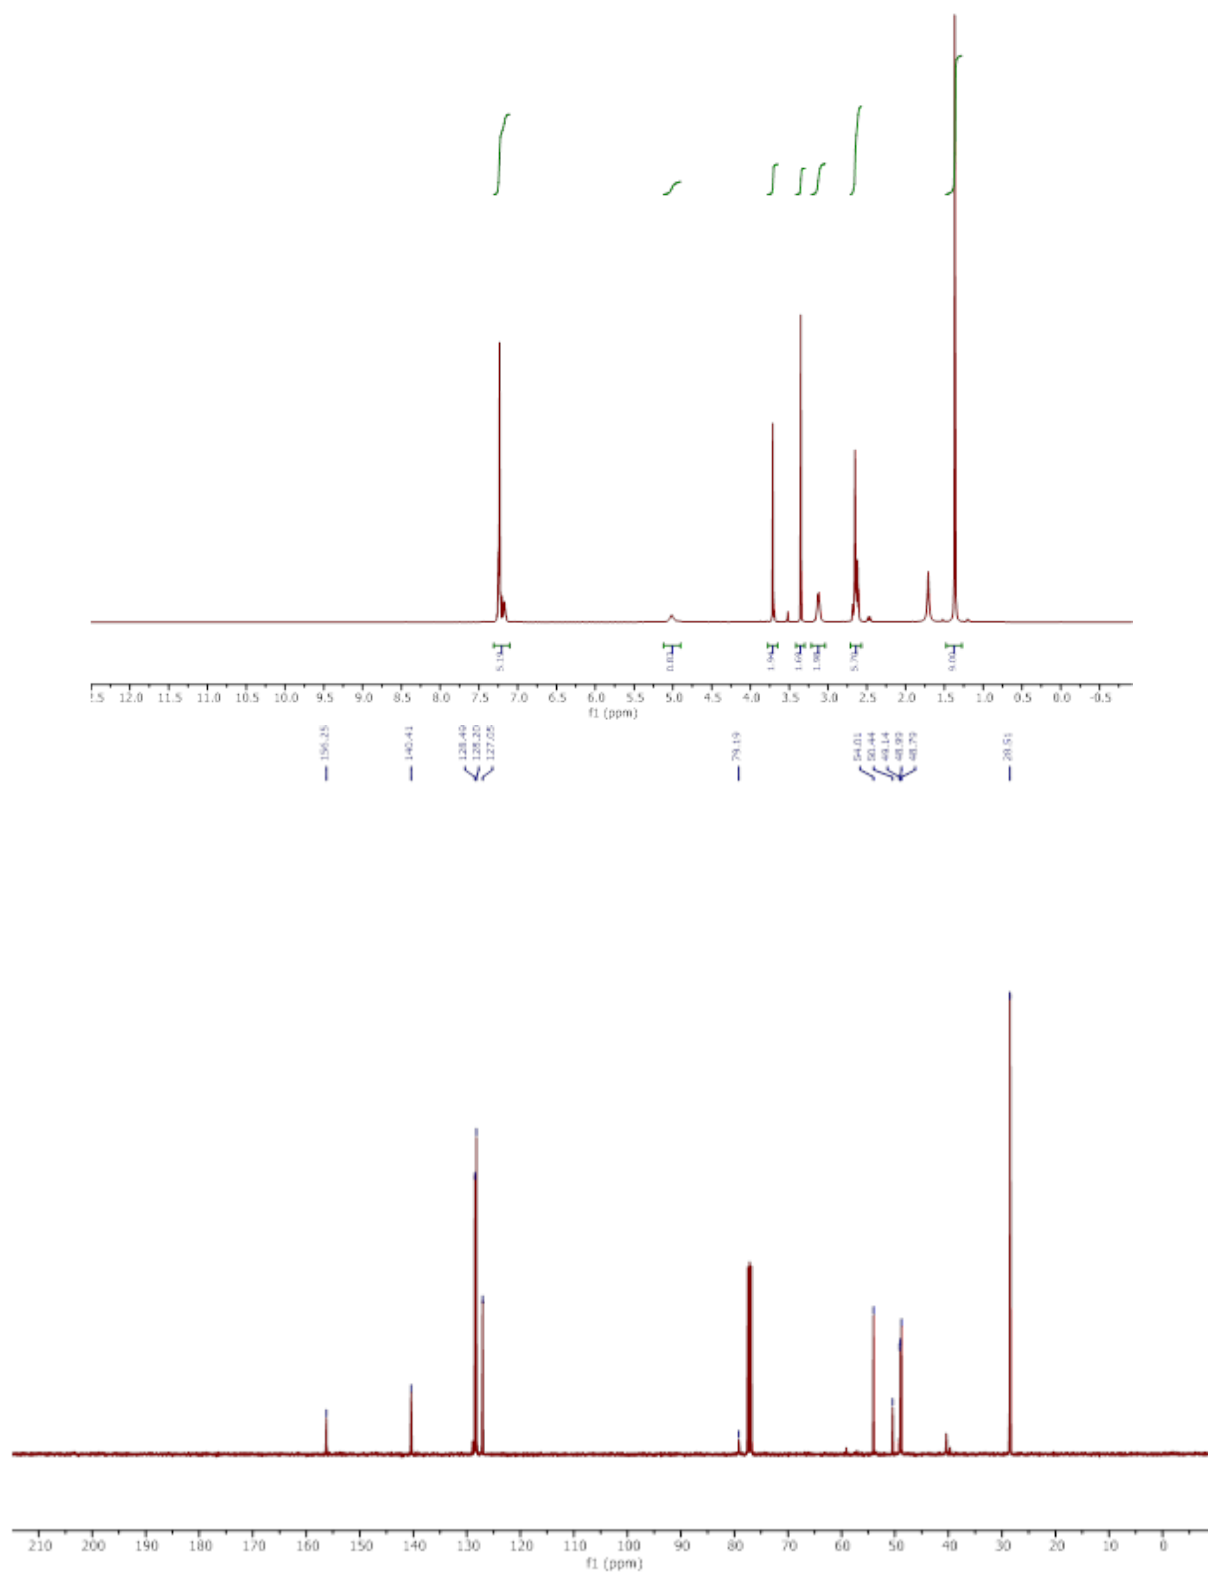

3aa *N*-ethyl-*N'*-(tert-butoxycarbonyl)diethylenetriamine (400 MHz, CDCl<sub>3</sub>)

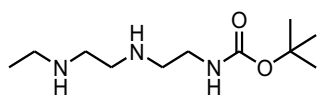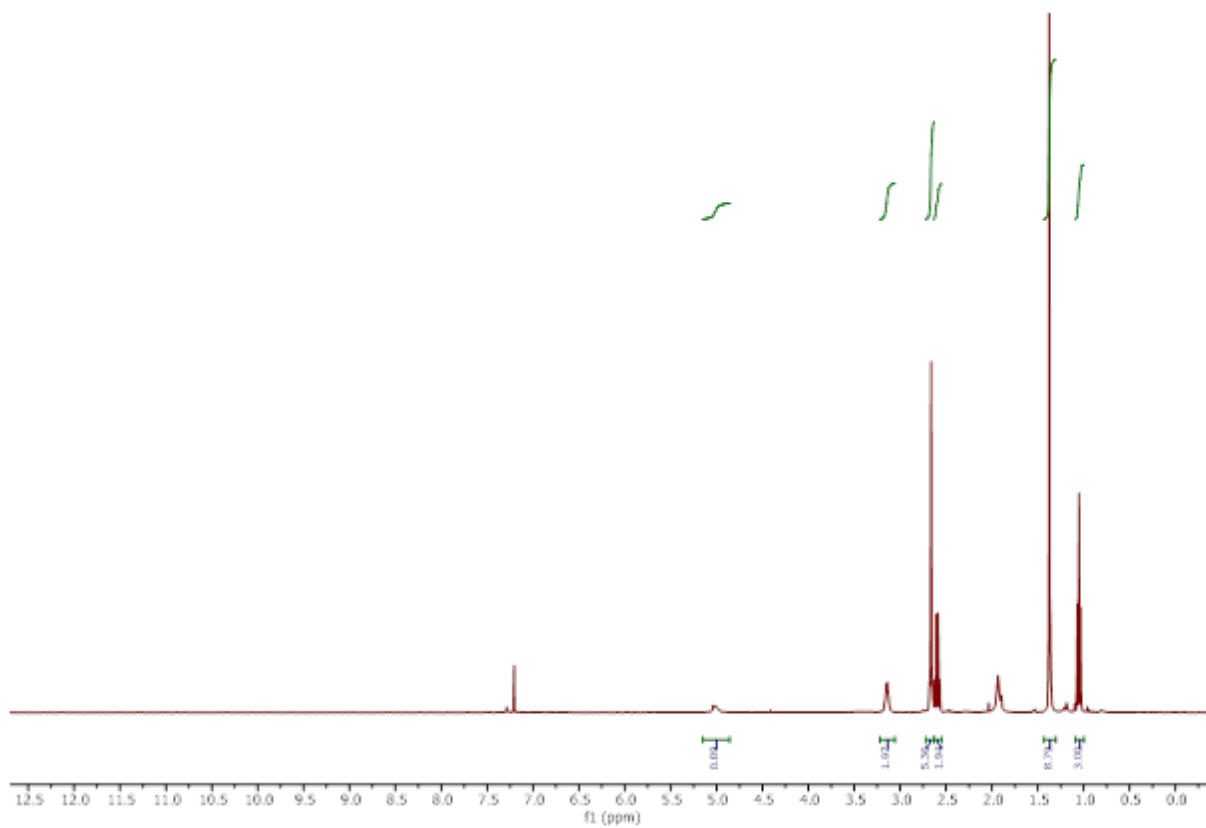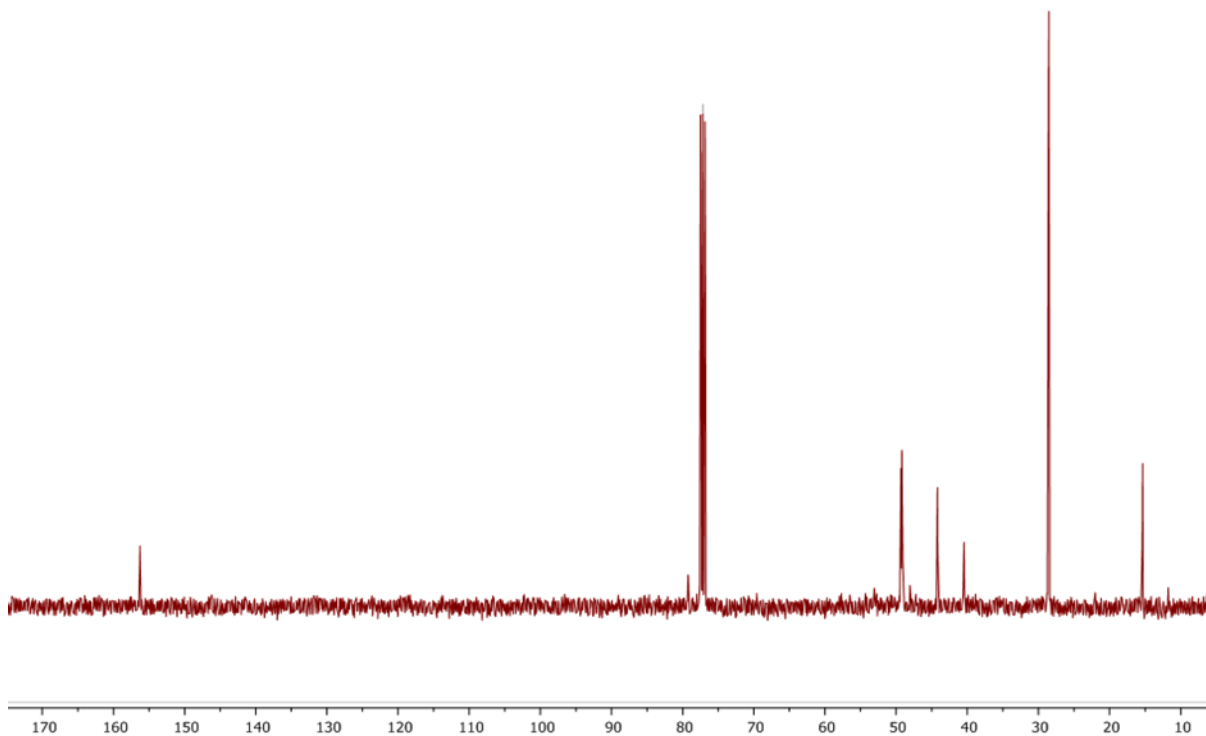

1ab *N,N''-bis(hexylcarbamoyl)-N-benzyl-N'-(tertbutoxycarbonyl)diethylenetriamine (400 MHz, CDCl<sub>3</sub>)*

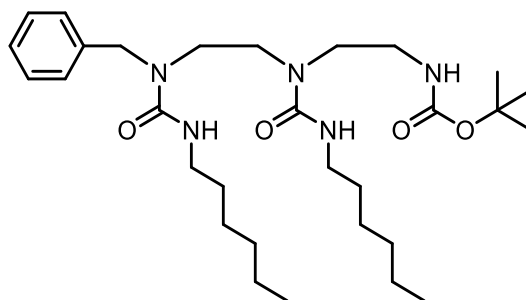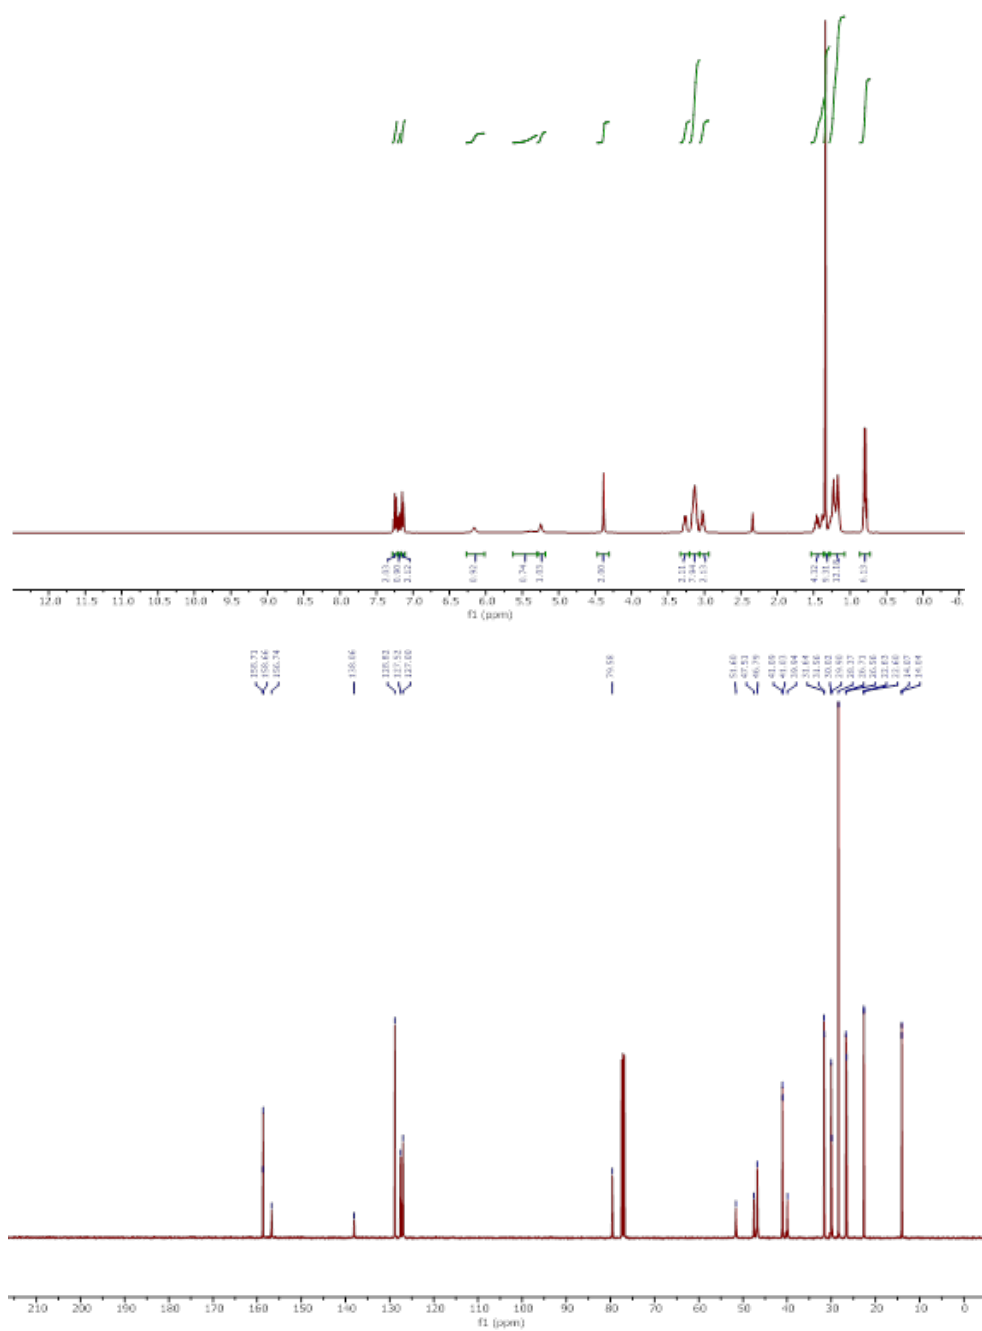

**1db N-(phenylcarbamoyl)-N-benzyl-N'-(tert-butoxycarbonyl)-N''-(phenylcarbamoyl)diethylenetriamine (400 MHz, CDCl<sub>3</sub>)**

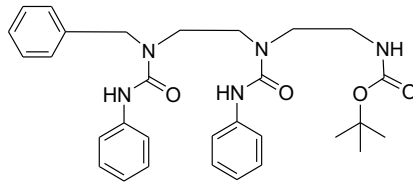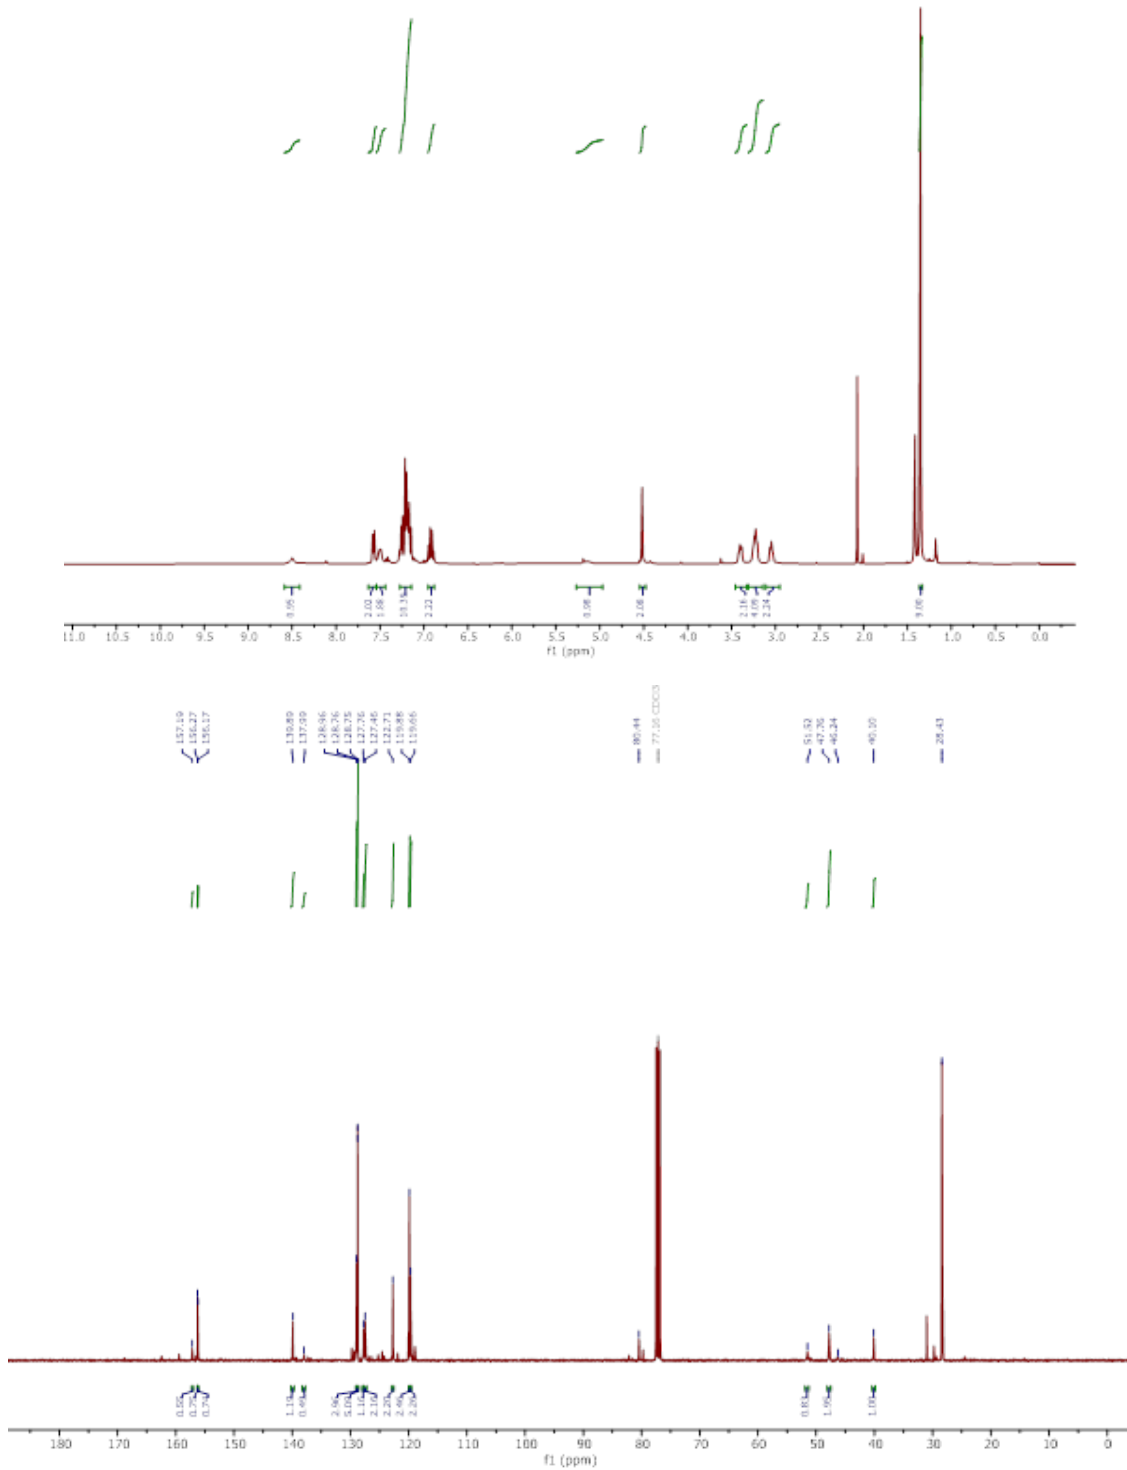



1eb *N,N''-bis(4-butoxyphenylcarbamoyl)-N-benzyl-N'-(tert-butoxycarbonyl)diethylenetriamine* (400 MHz, CDCl<sub>3</sub>)

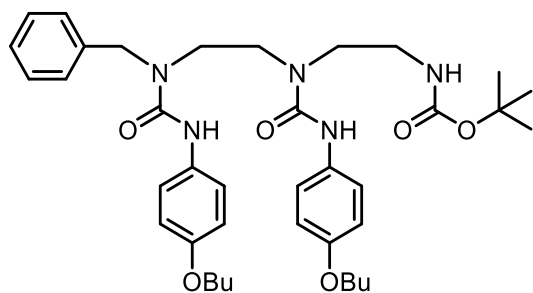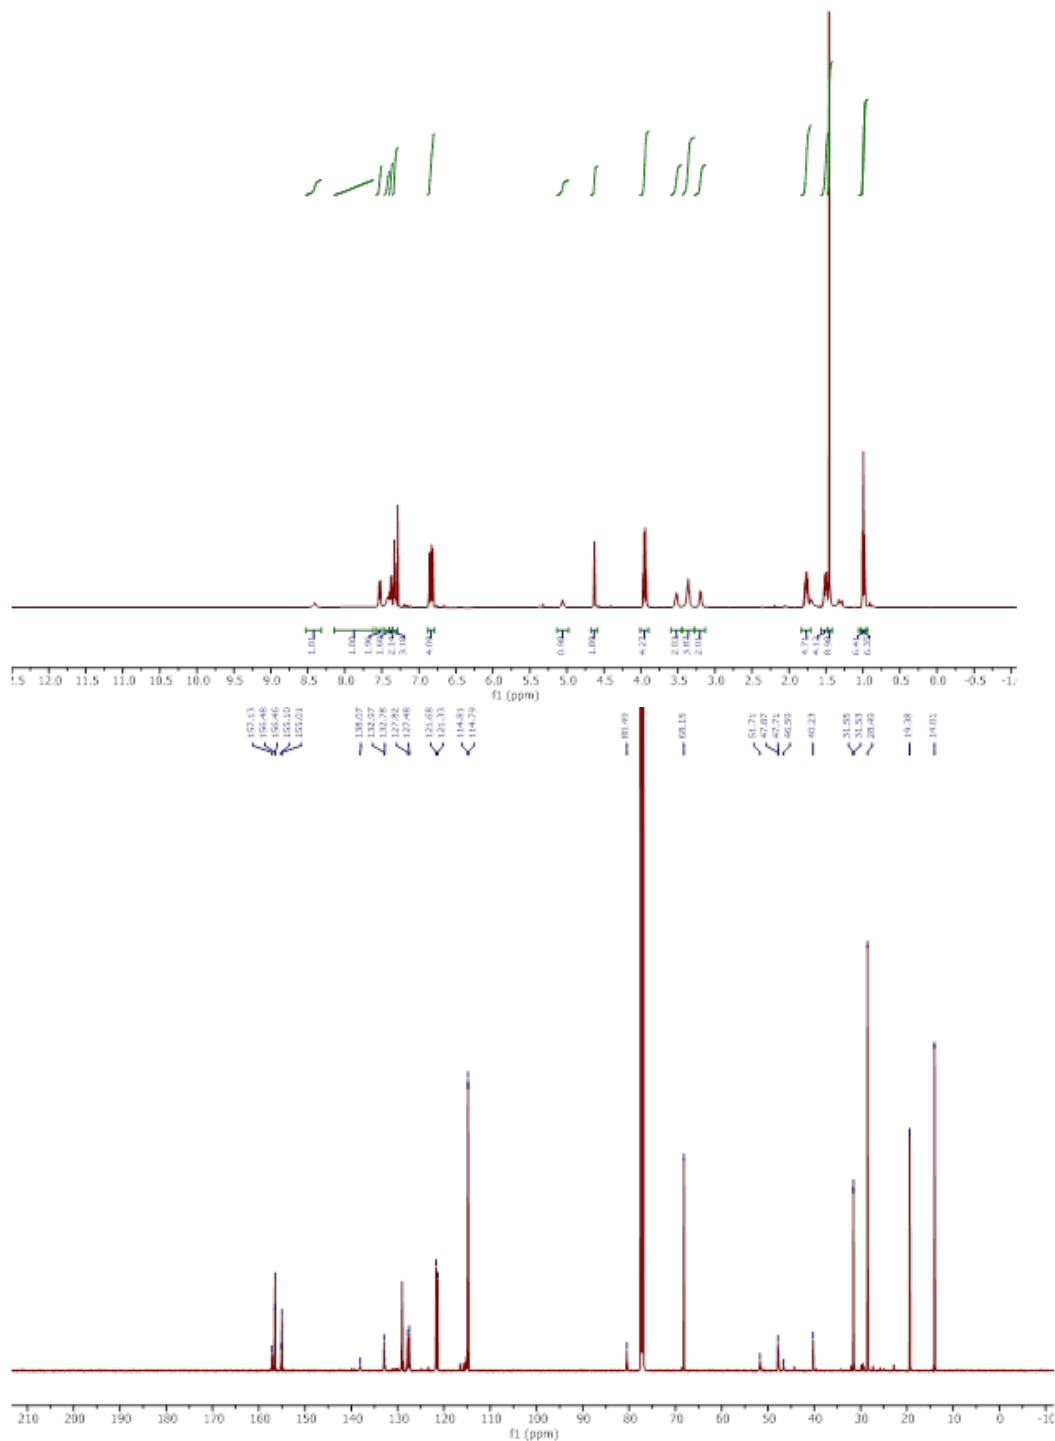

3ab *N*-ethyl-*N,N'*-bis(phenylcarbamoyl)-*N'*-(tertbutoxycarbonyl)diethylenetriamine (400 MHz, CDCl<sub>3</sub>)

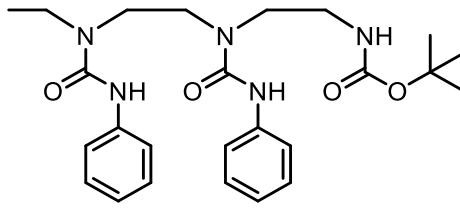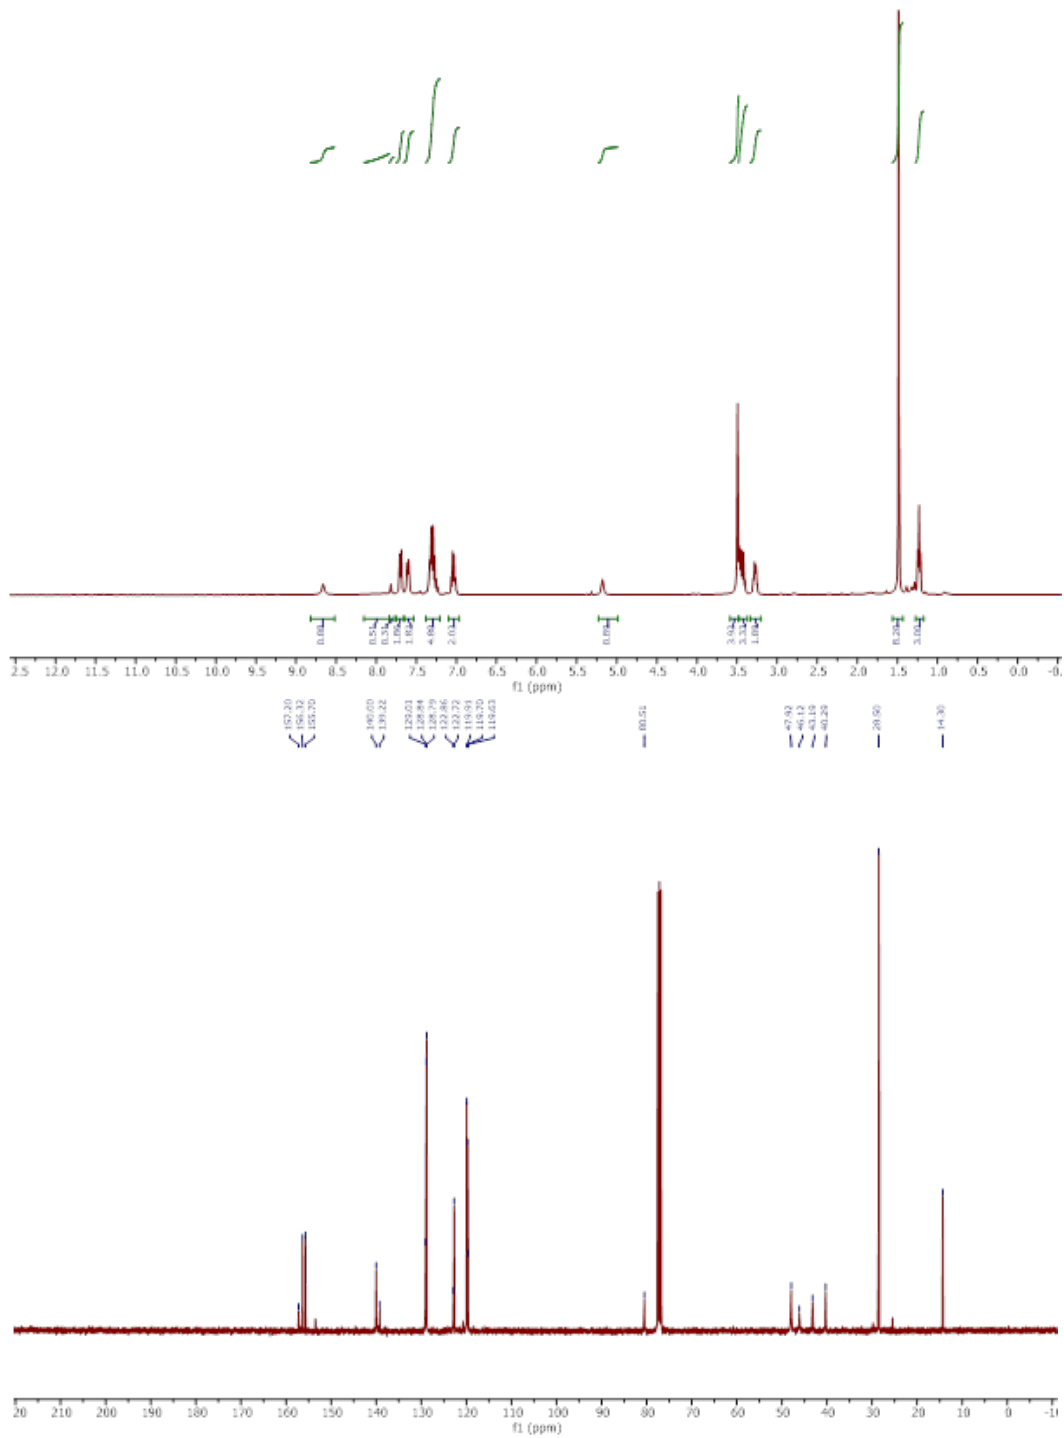

1ac *N,N''*-bis(hexylcarbamoyl)-*N*-benzyl-diethylenetriamine, trifluoroacetic salt (400 MHz, CDCl<sub>3</sub>)

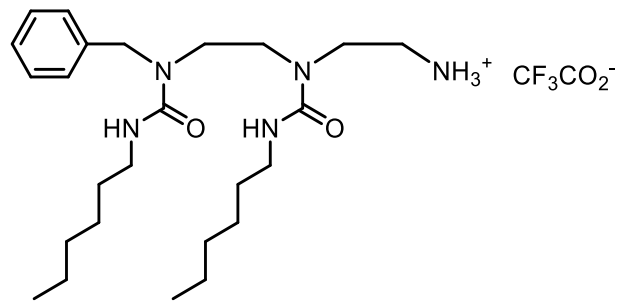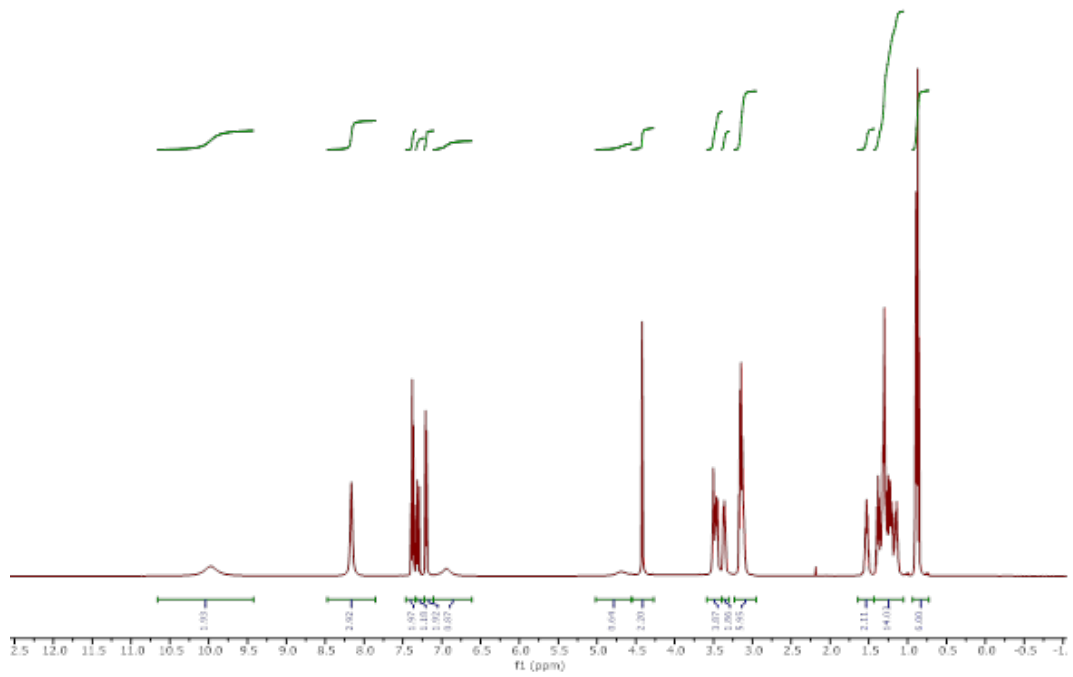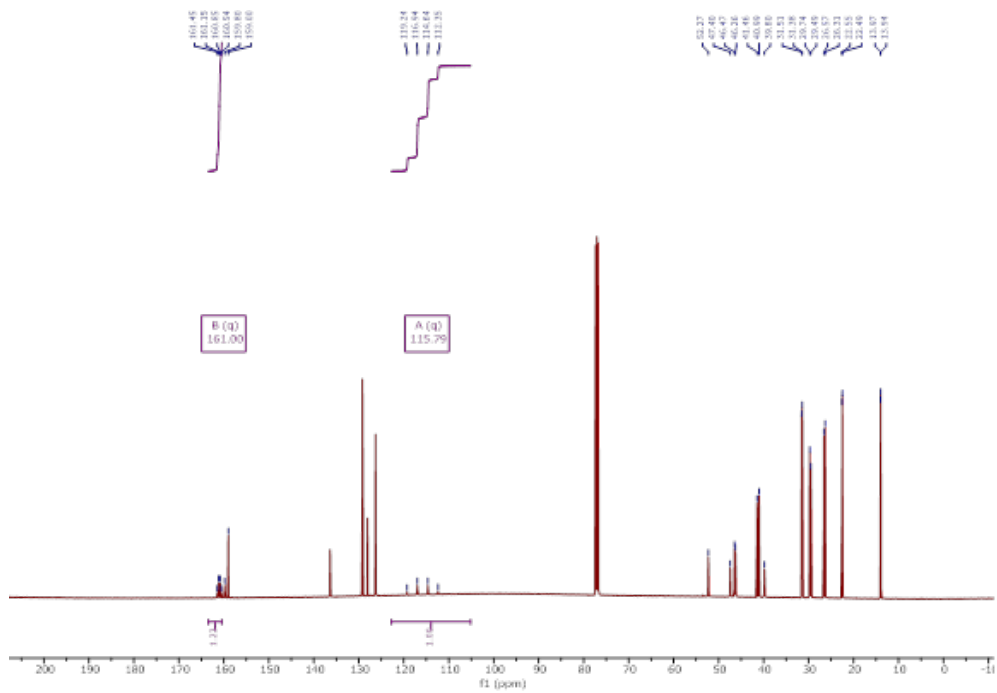

1d *N*-(phenylcarbamoyl)-*N*-benzyl-*N*'-(phenylcarbamoyl)diethylenetriamine (400 MHz, CDCl<sub>3</sub>)

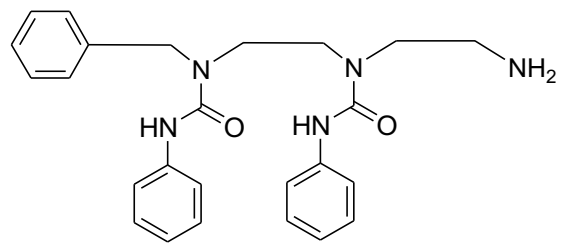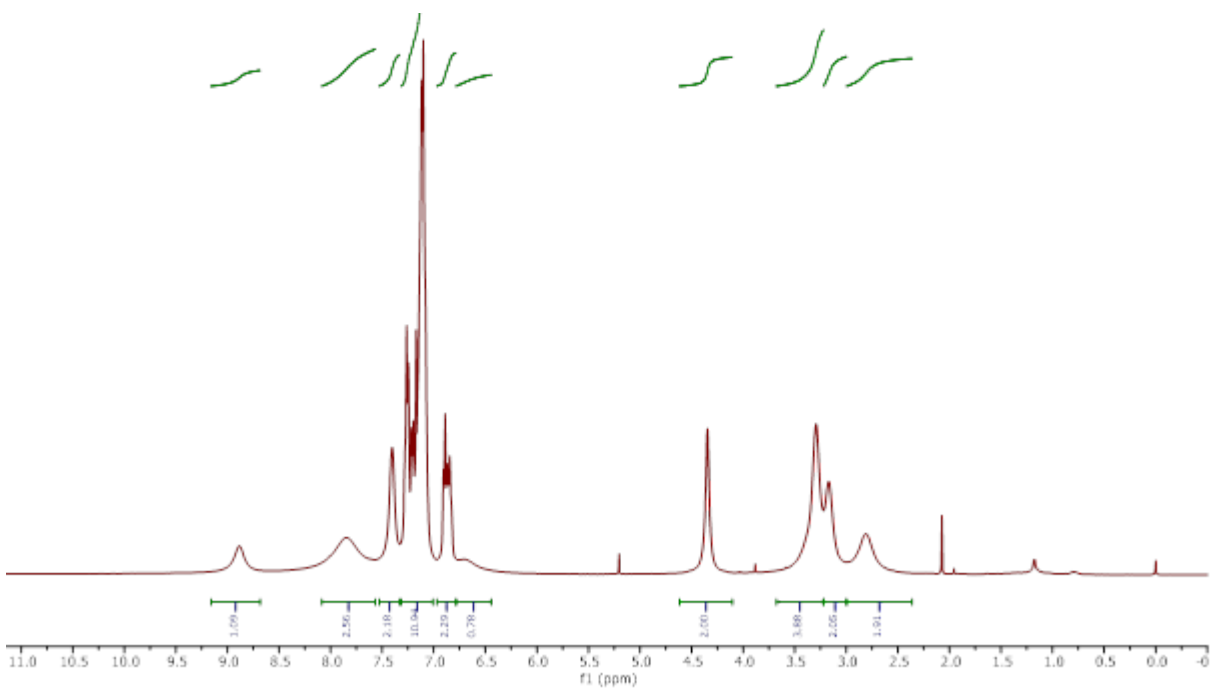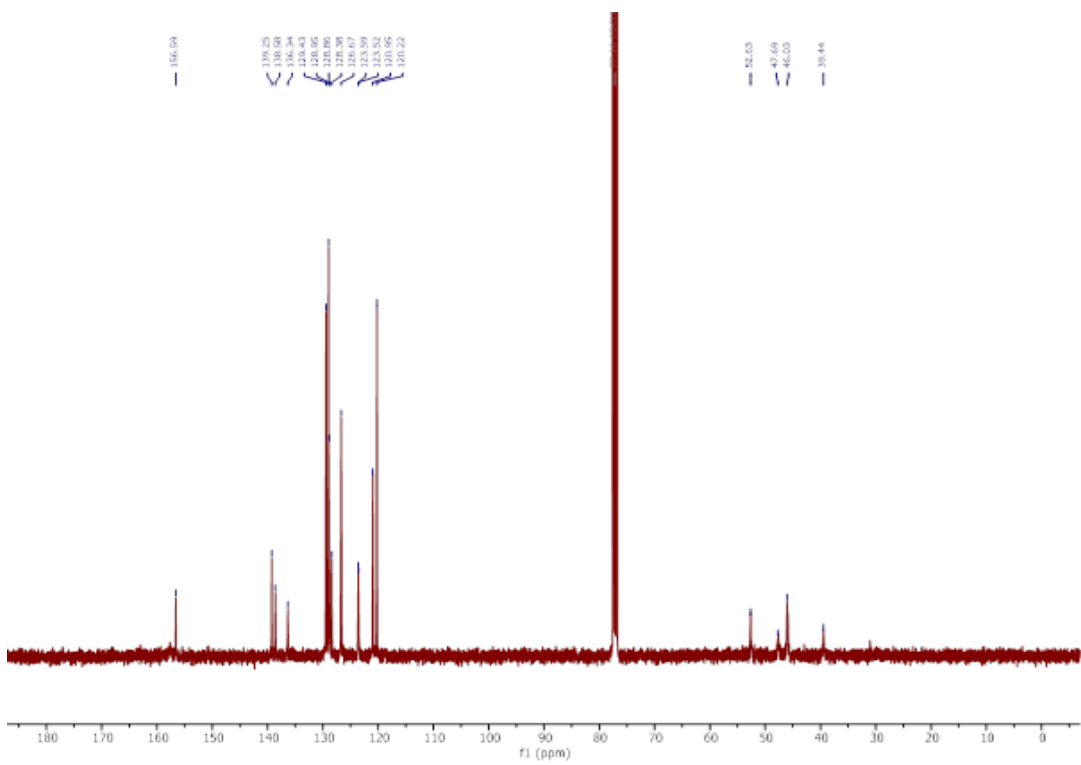

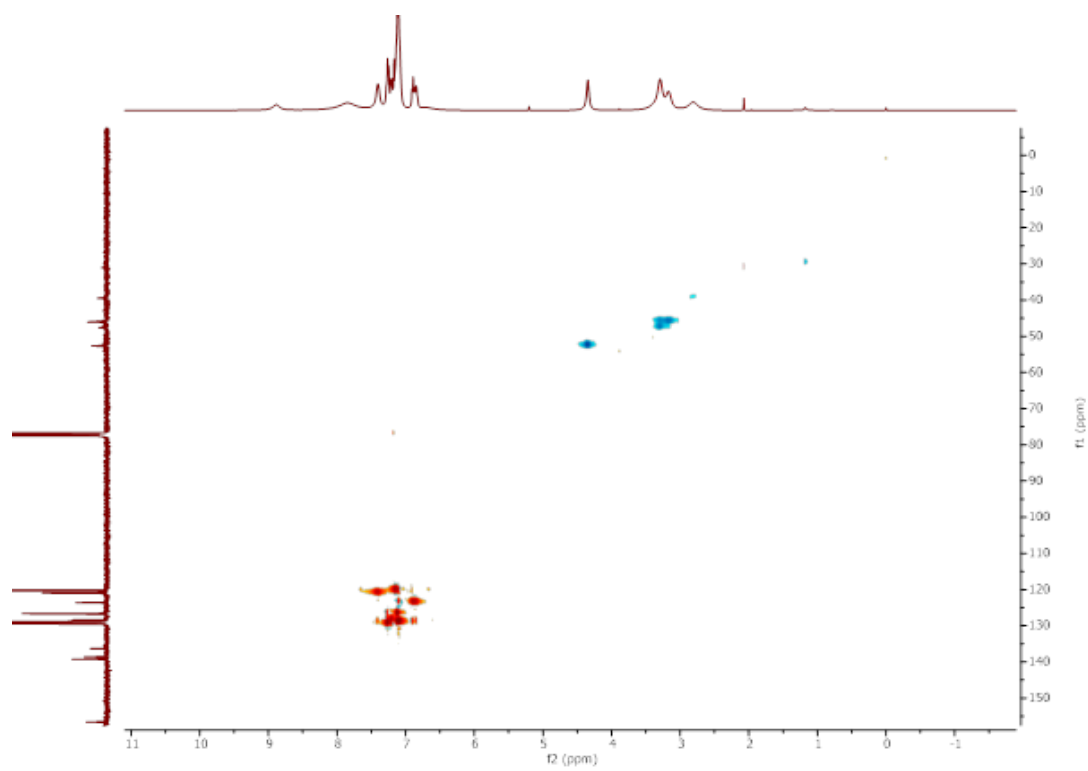

1ec *N,N''-bis(4-butoxyphenylcarbamoyl)-N-benzyl*diethylenetriamine, trifluoroacetate salt (400 MHz, CDCl<sub>3</sub>)

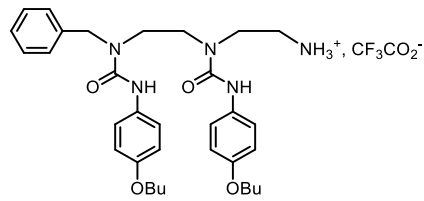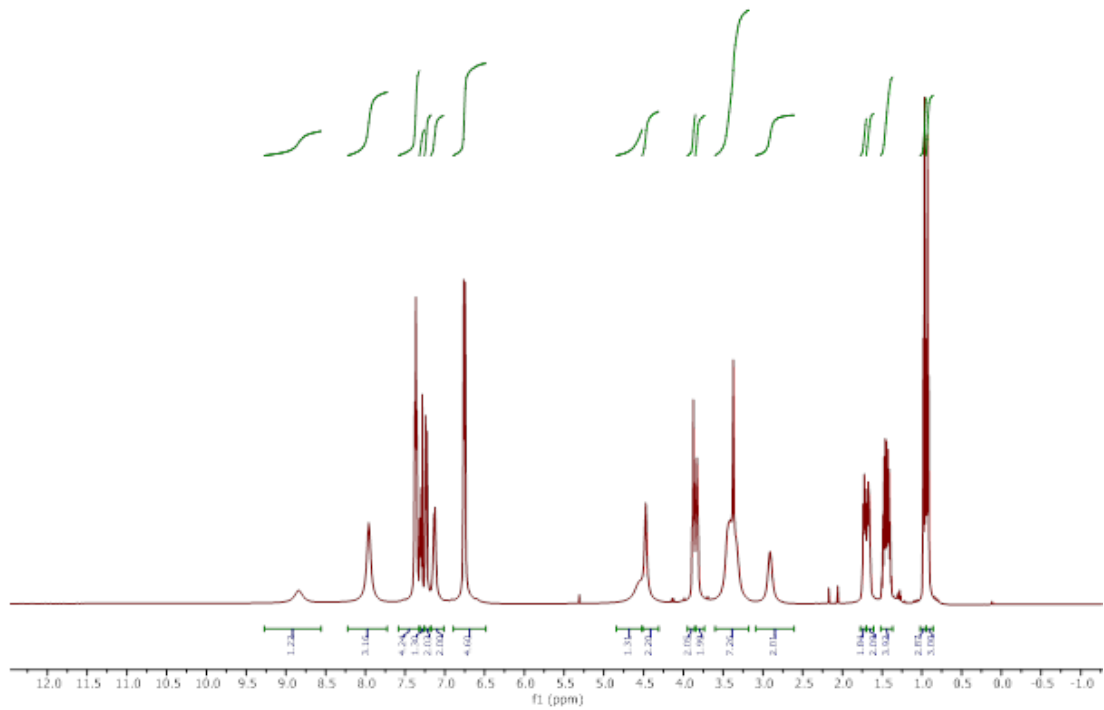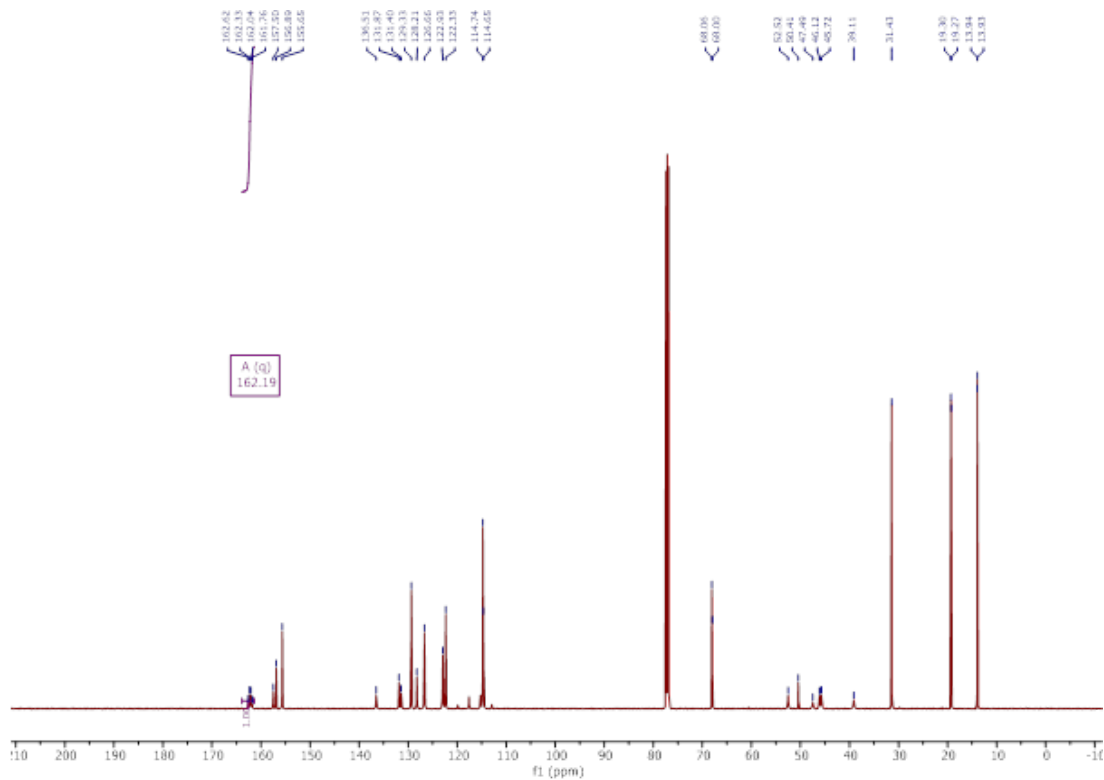

3ac *N,N''-bis(phenylcarbamoyl)-N-ethyldiethylenetriamine, trifluoroacetic salt (400 MHz, CDCl<sub>3</sub>)*

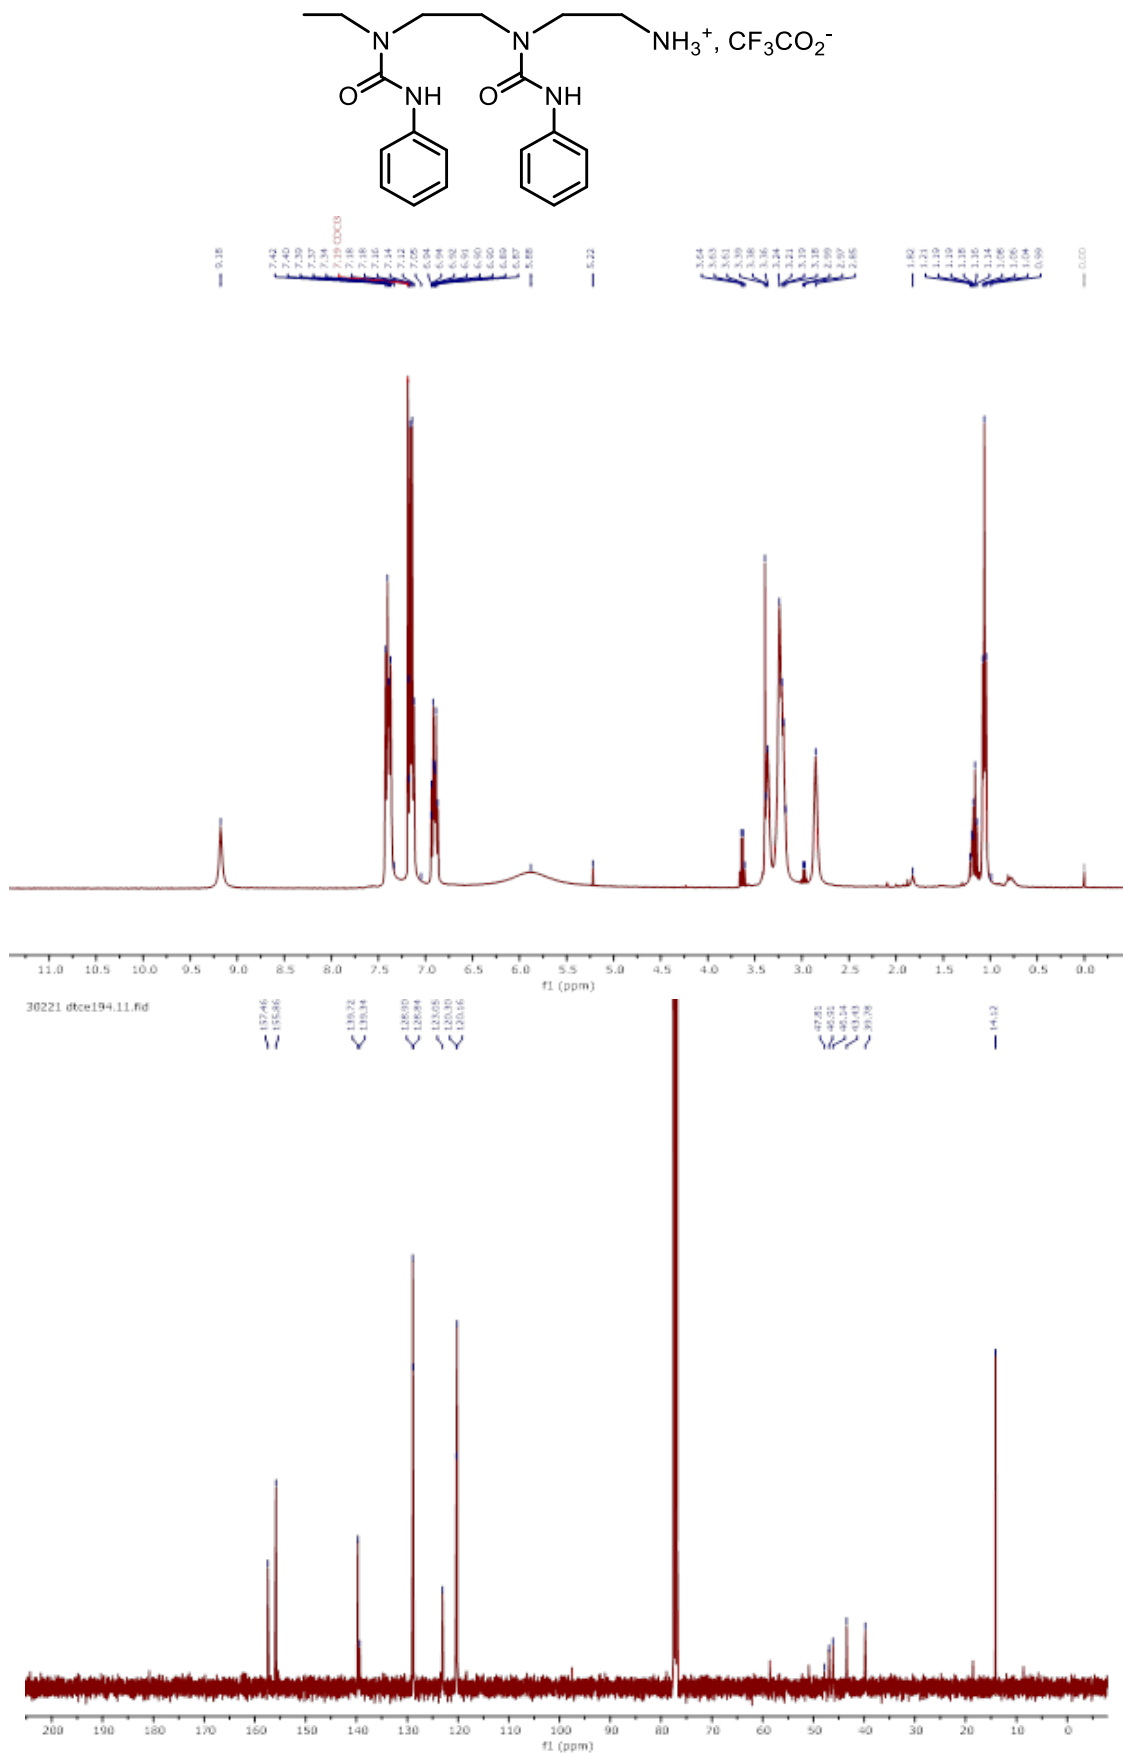

1a *N,N''-bis(hexylcarbamoyl)-N-benzyl-N'-(3,5-bis(trifluoromethyl)phenylcarbamoyl)diethylenetriamine* (400 MHz, CD<sub>2</sub>Cl<sub>2</sub>)

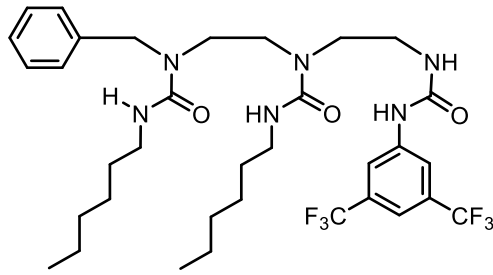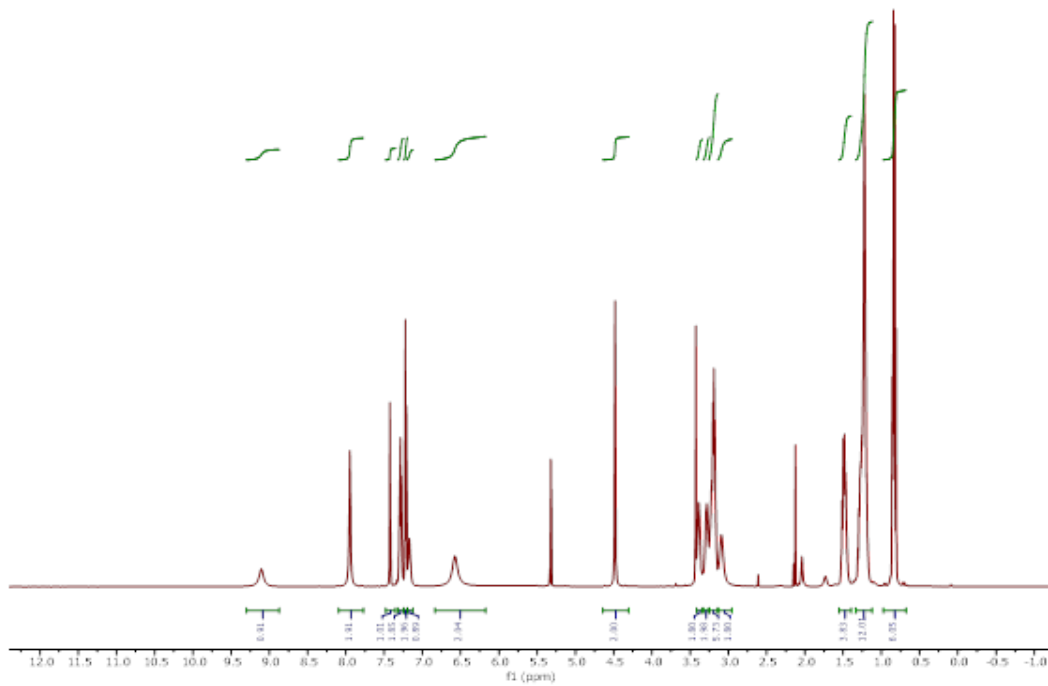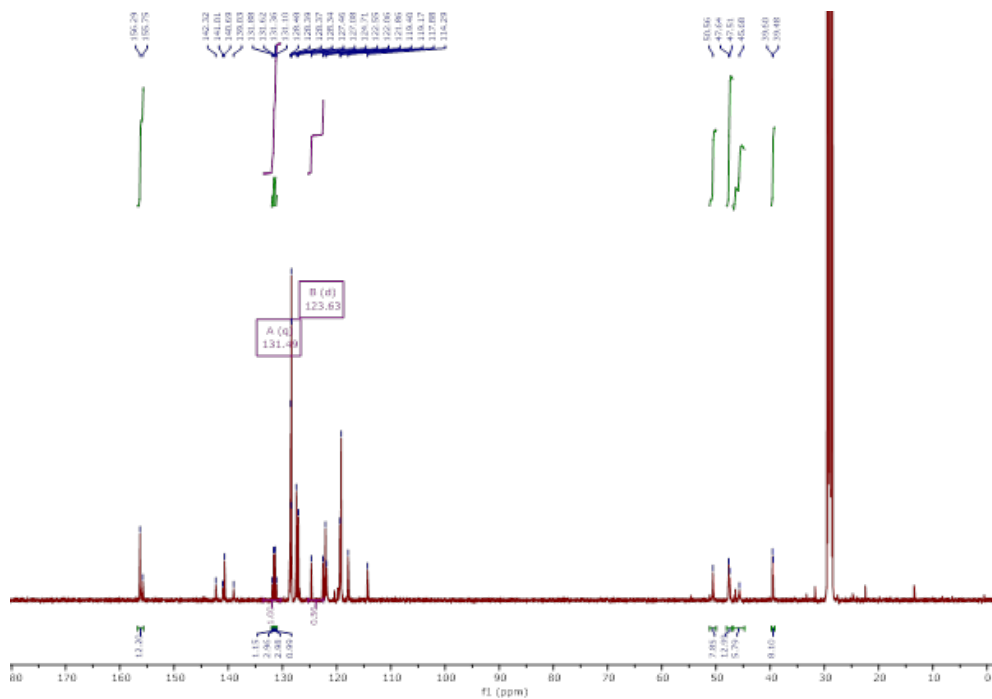



1d

*N*-(phenylcarbamoyl)-*N*-benzyl-*N'*-(phenylcarbamoyl)-*N'*-(3,5-bis(trifluoromethyl)phenylcarbamoyl)diethylenetriamine (400 MHz, acetone d<sub>6</sub>)

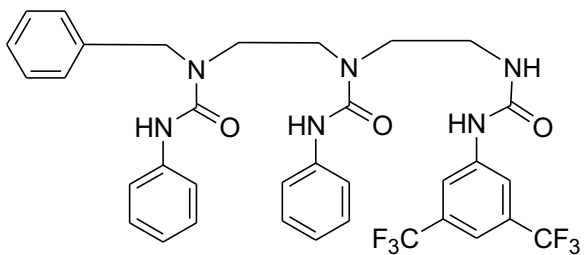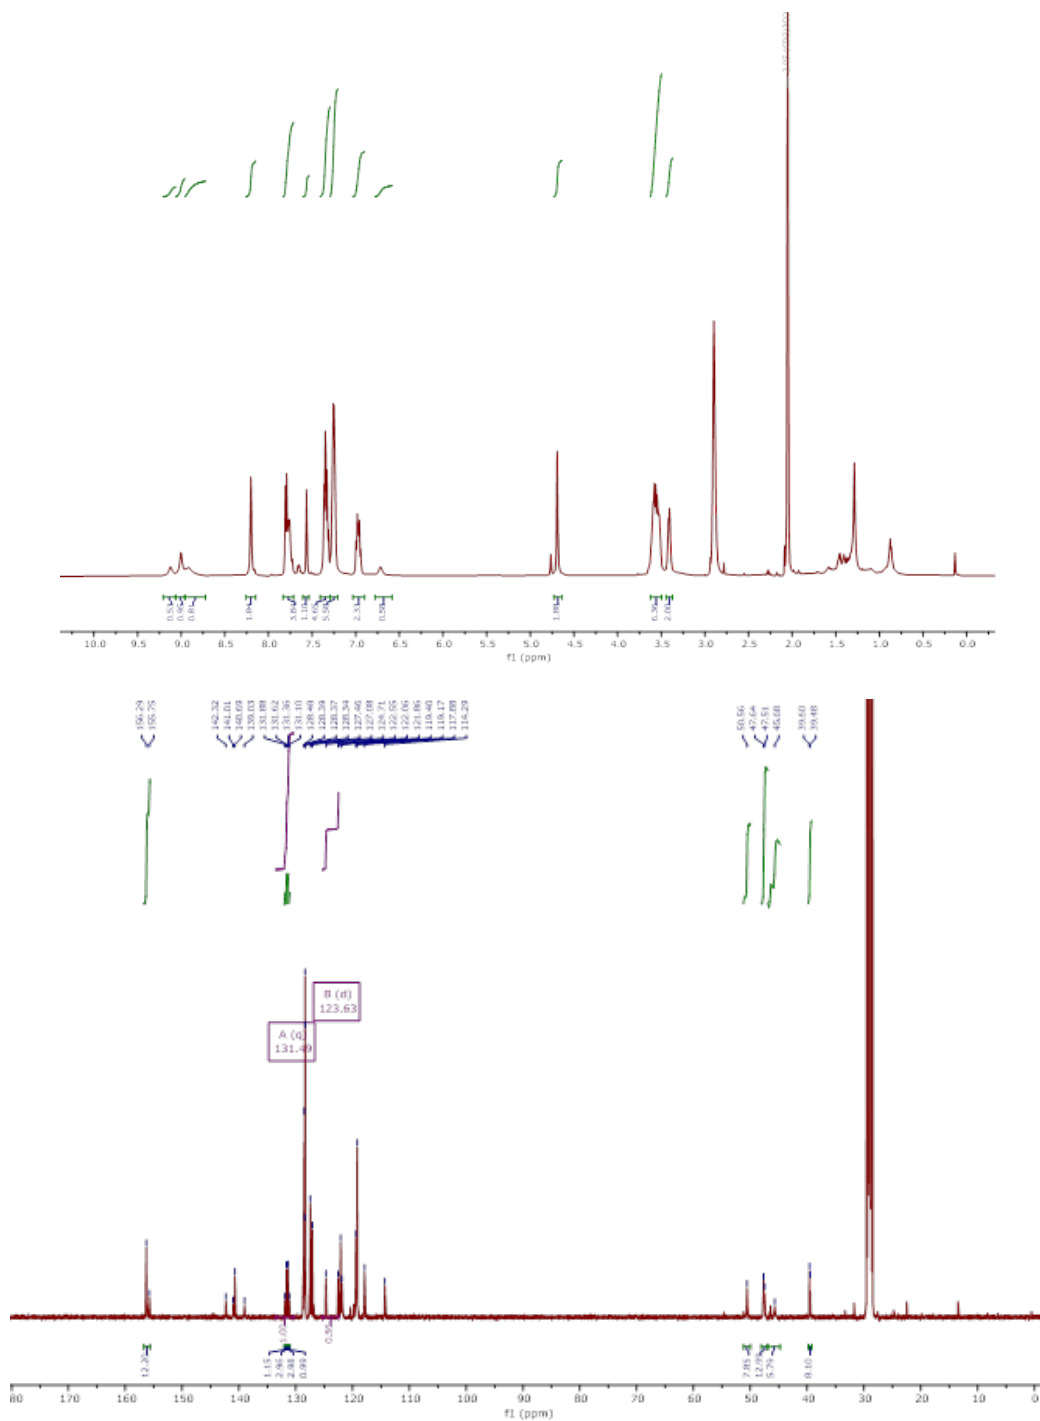

**1e** *N,N''-bis(4-butoxyphenylcarbamoyl)-N-benzyl-N'-(3,5-bis(trifluoromethyl)phenylcarbamoyl) diethylenetriamine*

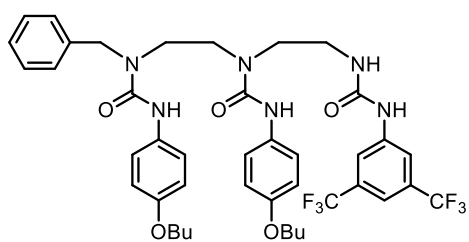

In CDCl<sub>3</sub>

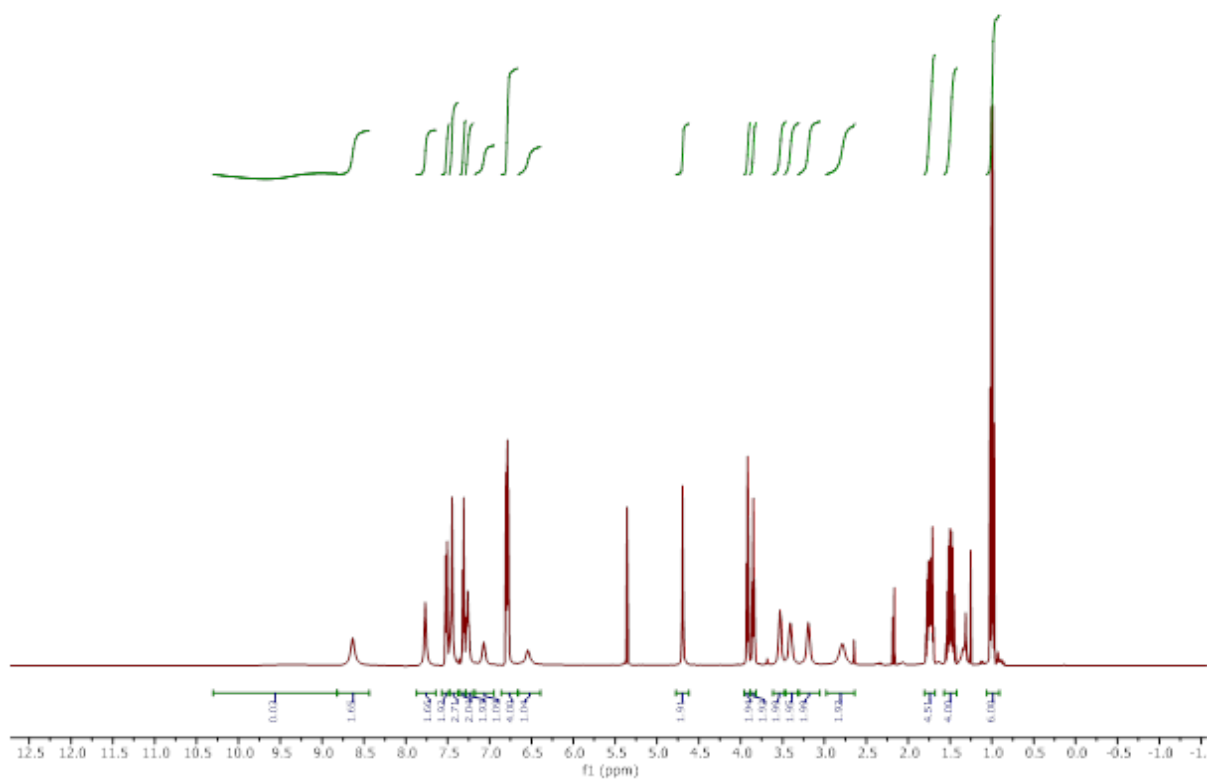

In CD<sub>2</sub>Cl<sub>2</sub>

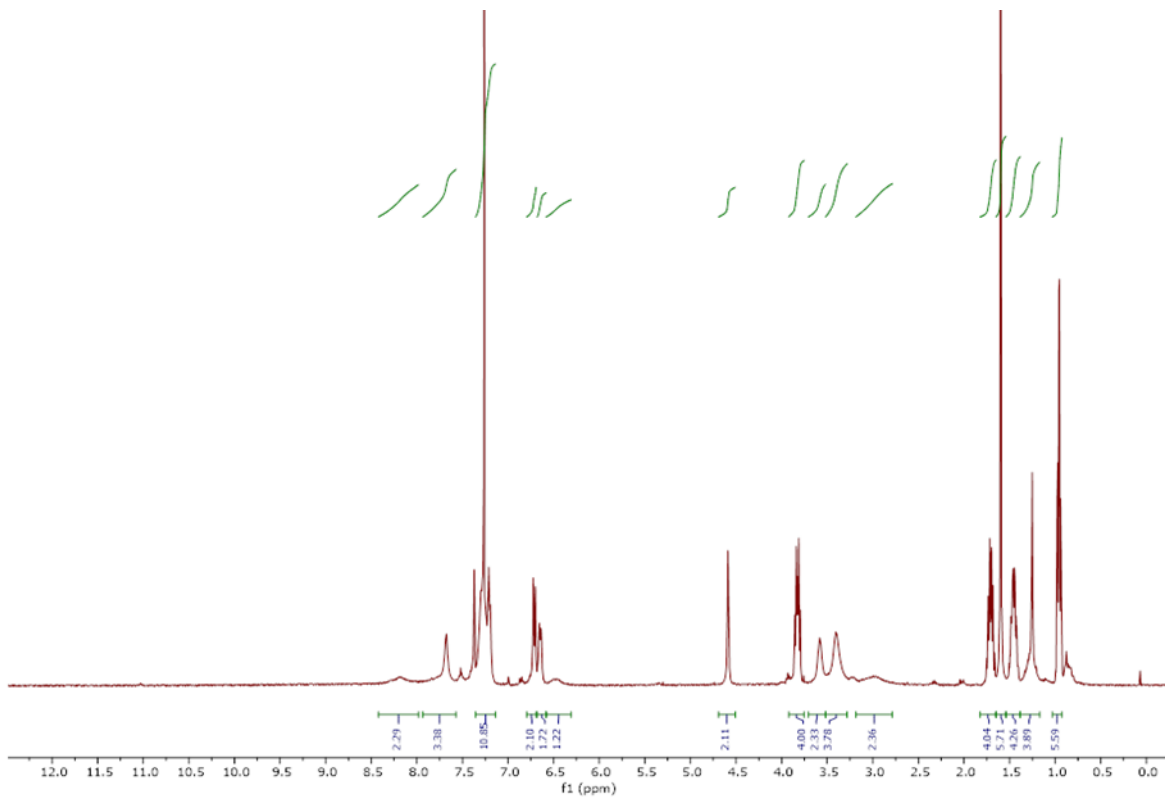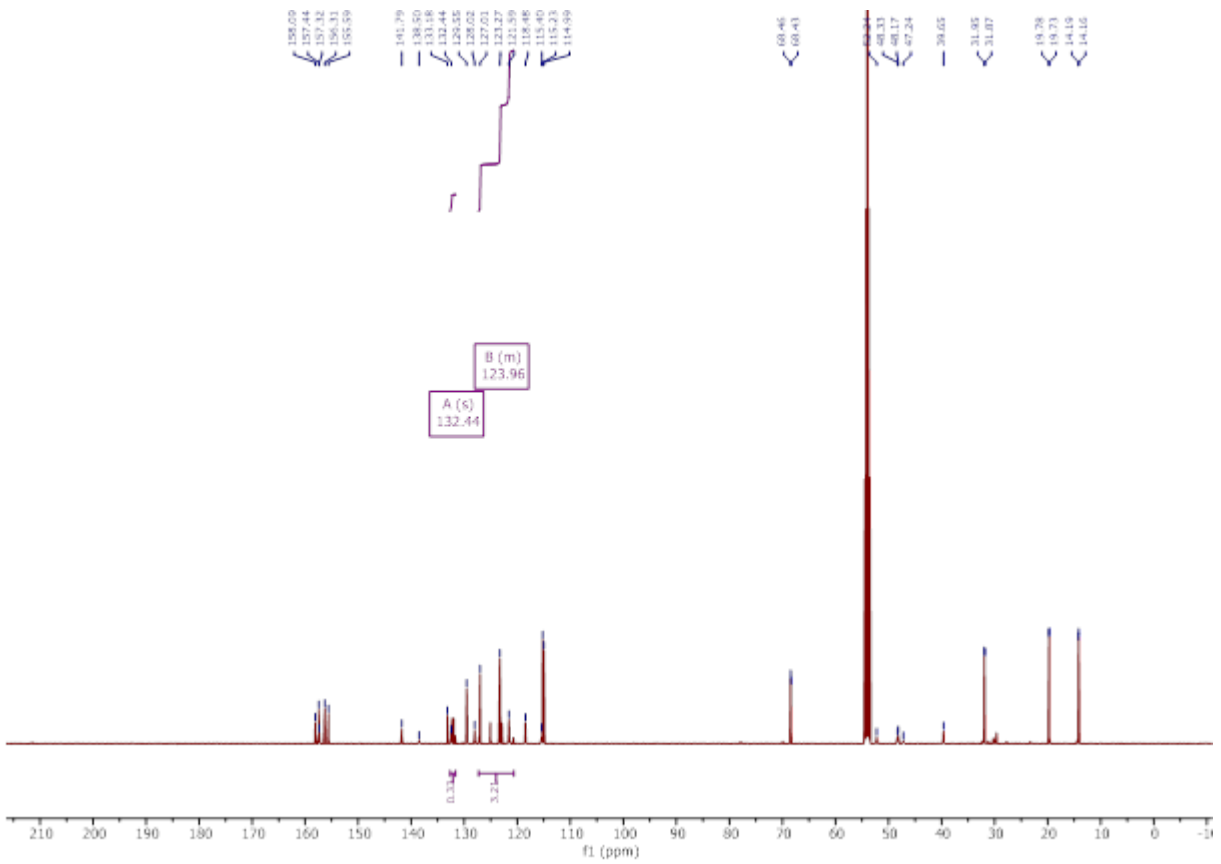

**3a** *N*-Ethyl-*N,N'*-bis(phenylcarbamoyl)-*N'*-(4-trifluoromethylphenylcarbamoyl)diethylenetriamine (400 MHz, CD<sub>2</sub>Cl<sub>2</sub> +MeOH)

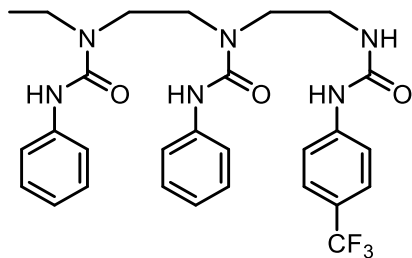

31071 dtde16cd2d2meoh.10.fid

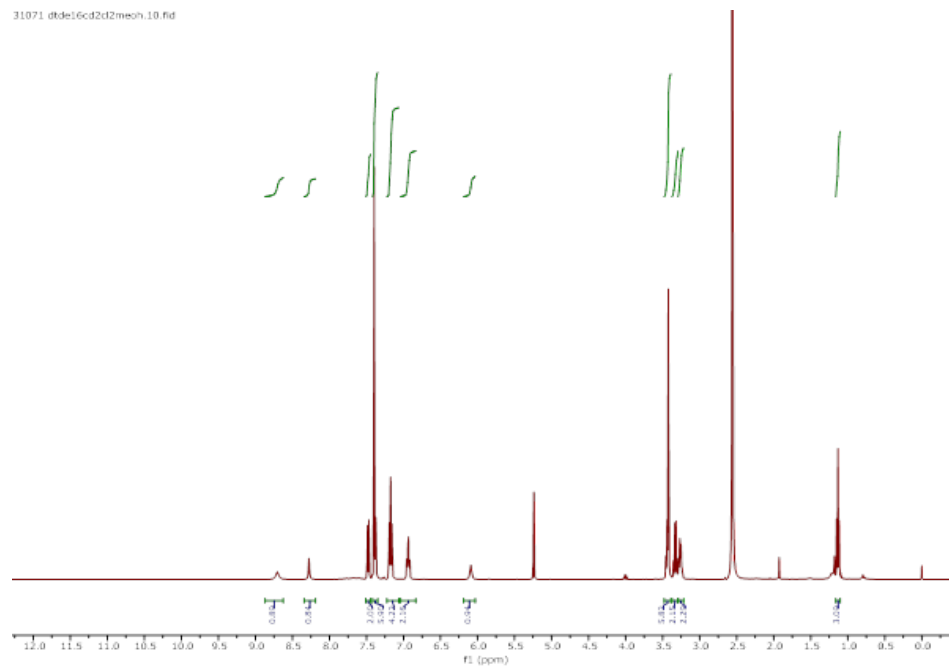

31071 dtde16cd2d2meoh.12.fid

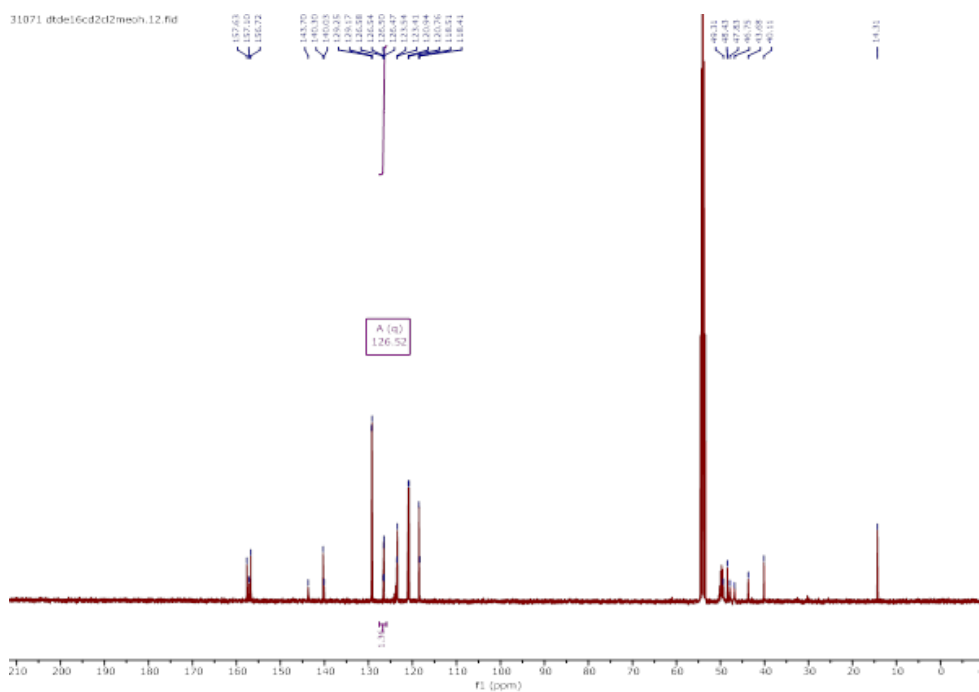

**3b** *N*-Ethyl-*N,N'*-bis(phenylcarbamoyl)-*N'*-(3,5-bis(trifluoromethyl)phenylcarbamoyl)diethylenetriamine (400 MHz, DMSO d6)

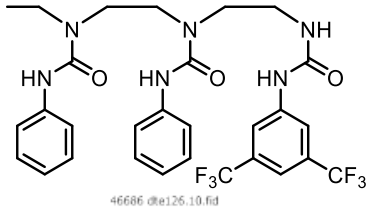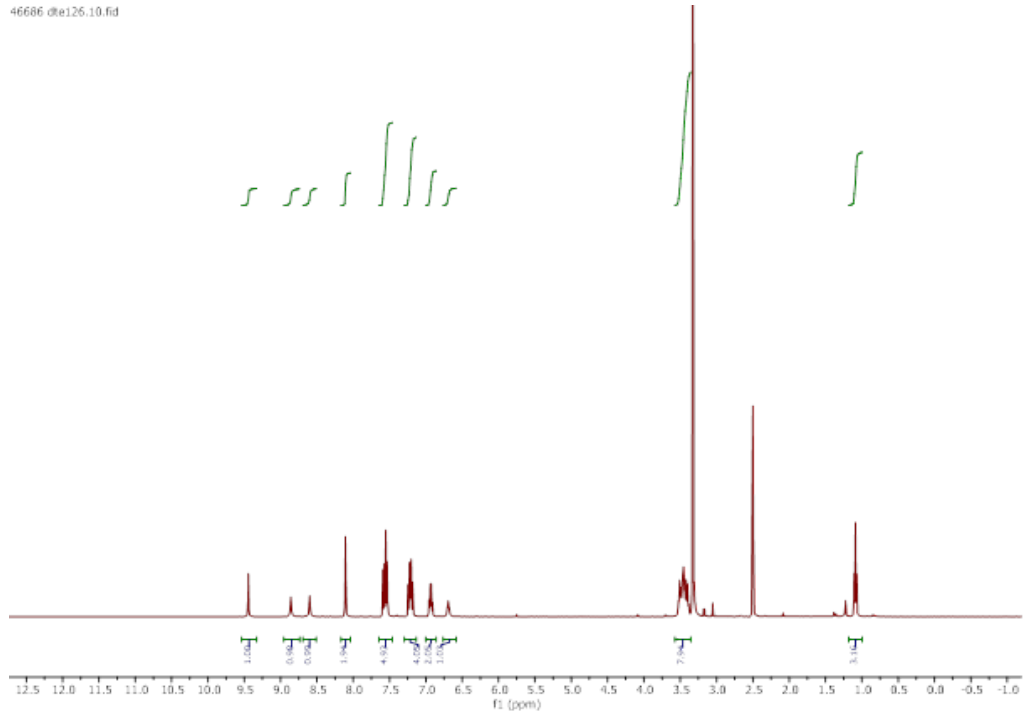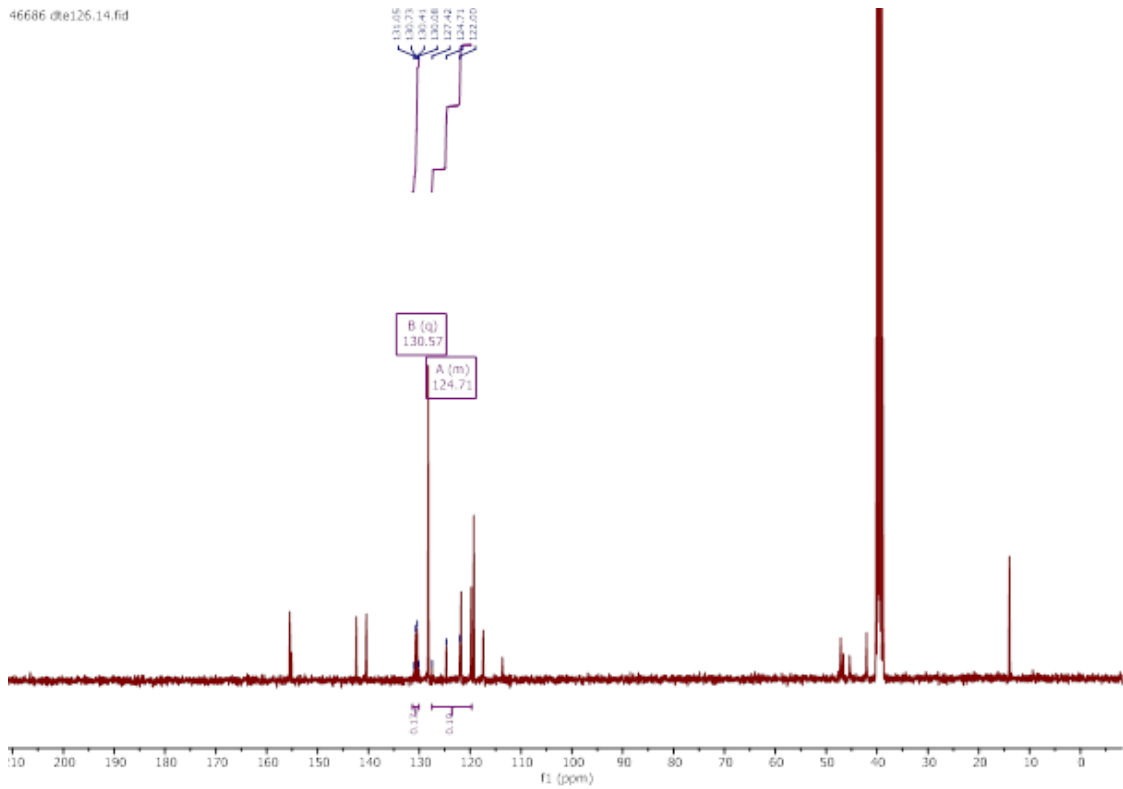

**Compound 5ab: *N,N'*-bis(hexylcarbamoyl)-*N*-benzyl-*N'*-(tertbutoxycarbonyl)triethylenetetramine (400 MHz in CDCl<sub>3</sub>)**

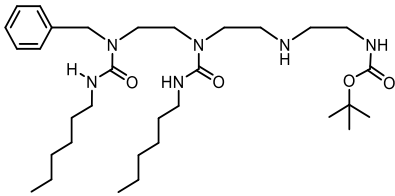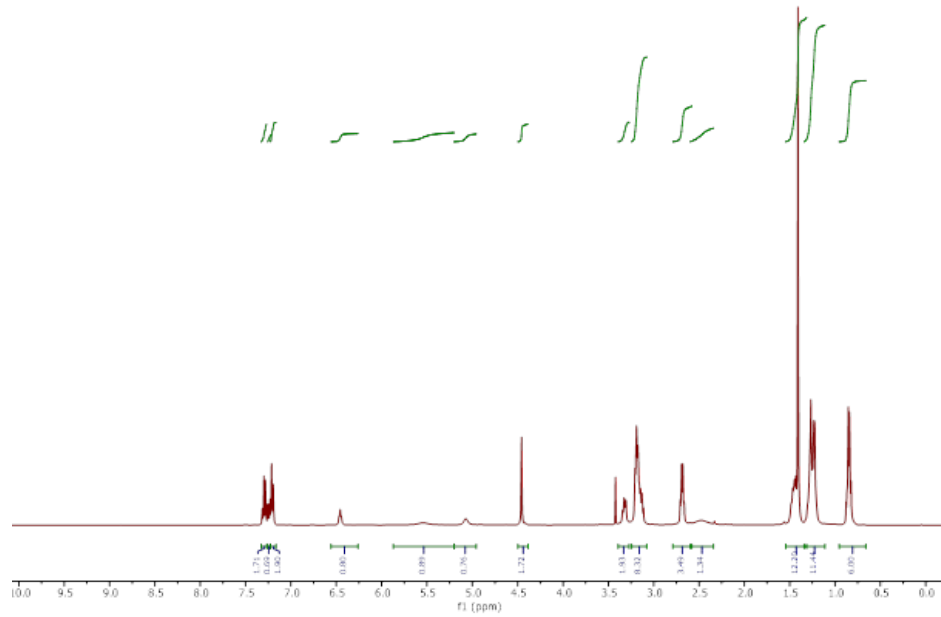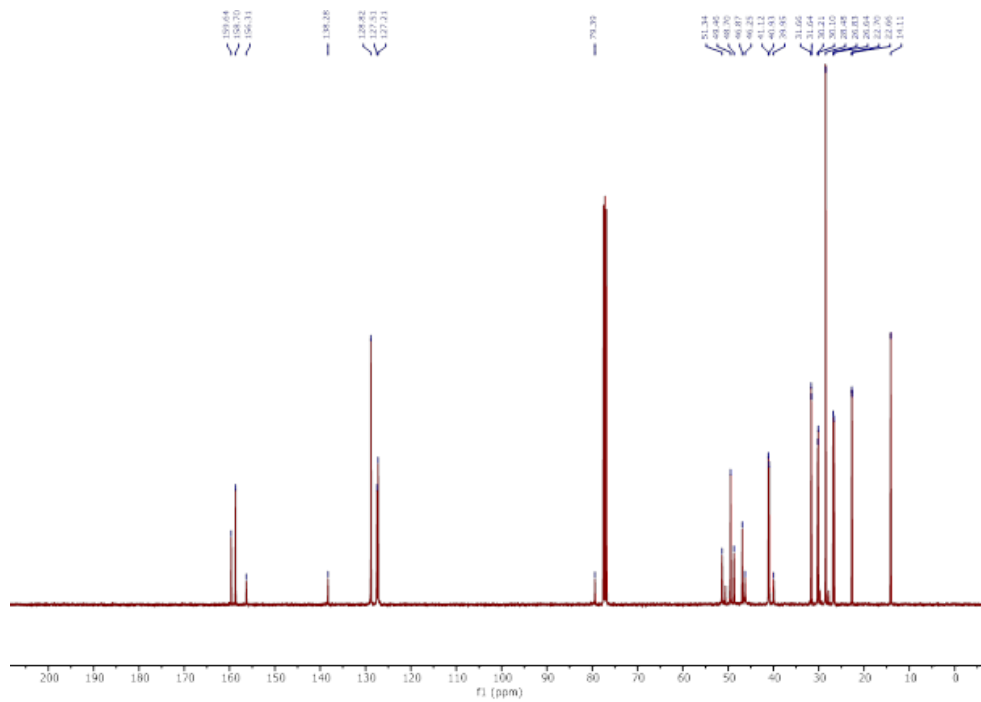

**Compound 5ac: *N,N',N''*-tri(hexylcarbamoyl)-*N*-benzyl-*N'*-(*tert*butoxycarbonyl)triethylenetetramine (400 MHz in CDCl<sub>3</sub>)**

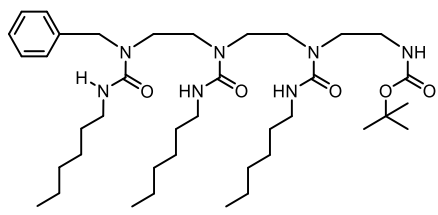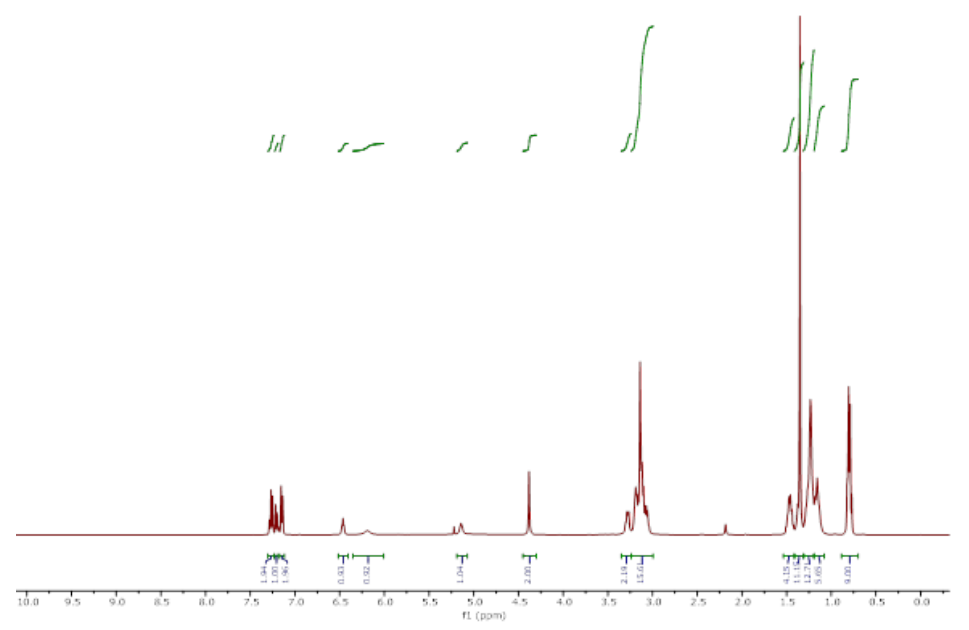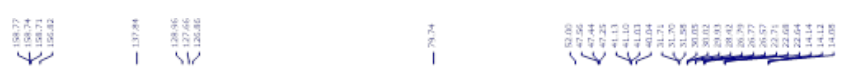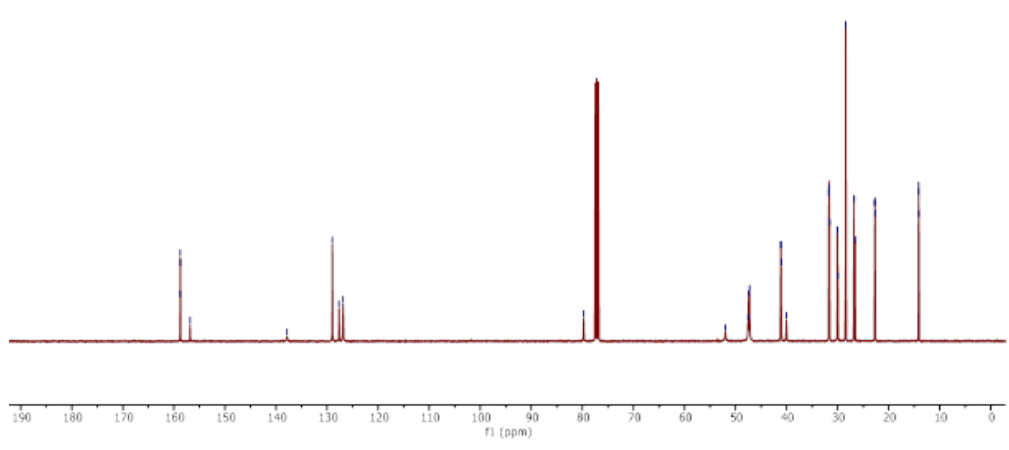

Compound **5bc**: *N''',N''''-bis(hexylcarbamoyl)-N-benzyl-N-(tertbutylcarbamoyl)-N'-(tertbutoxycarbonyl)triethylenetetramine (400 MHz in CDCl<sub>3</sub>)*

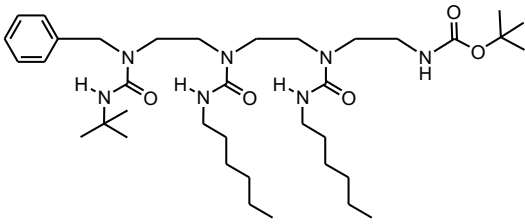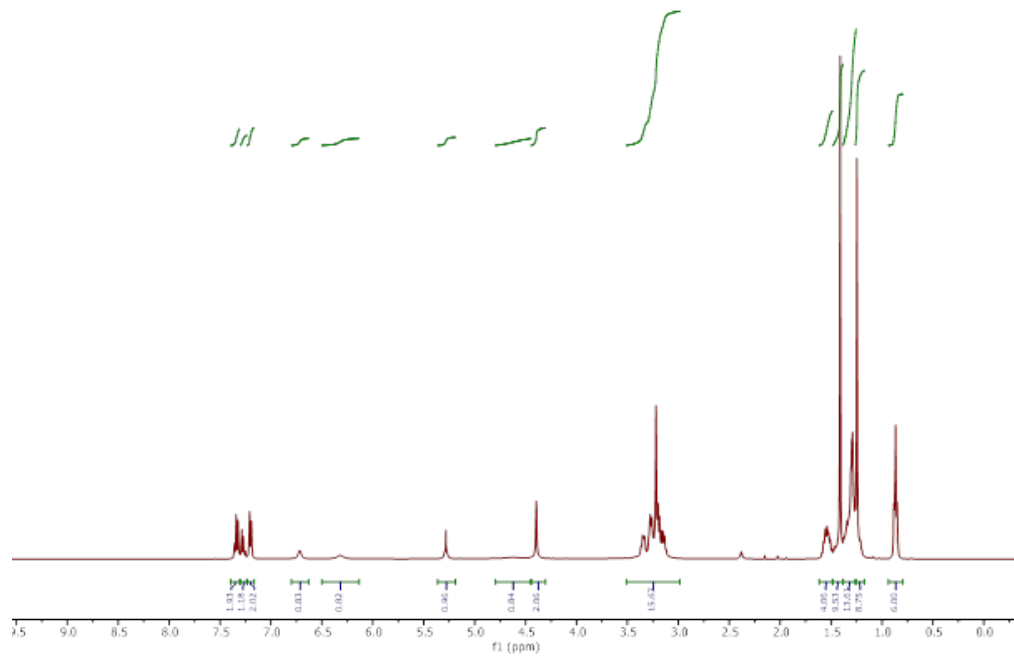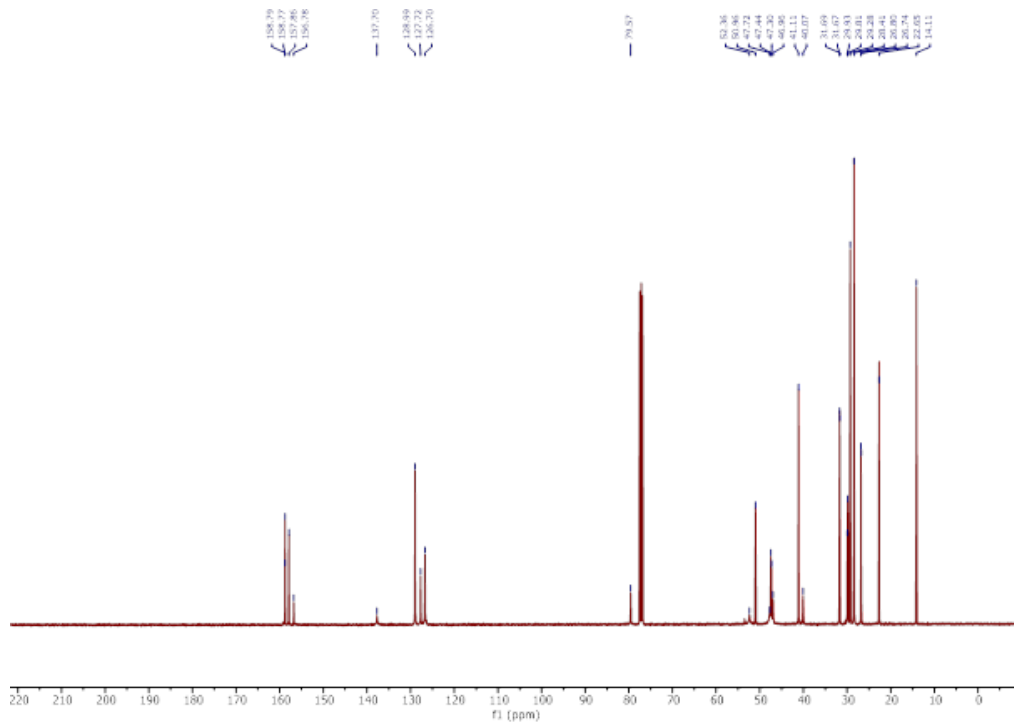



Compound 5ad: *N*-benzyl-*N,N',N'''*-tri(hexylcarbamoyl)triethylenetetramine (400 MHz, CDCl<sub>3</sub>)

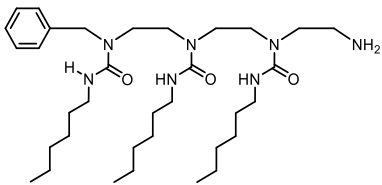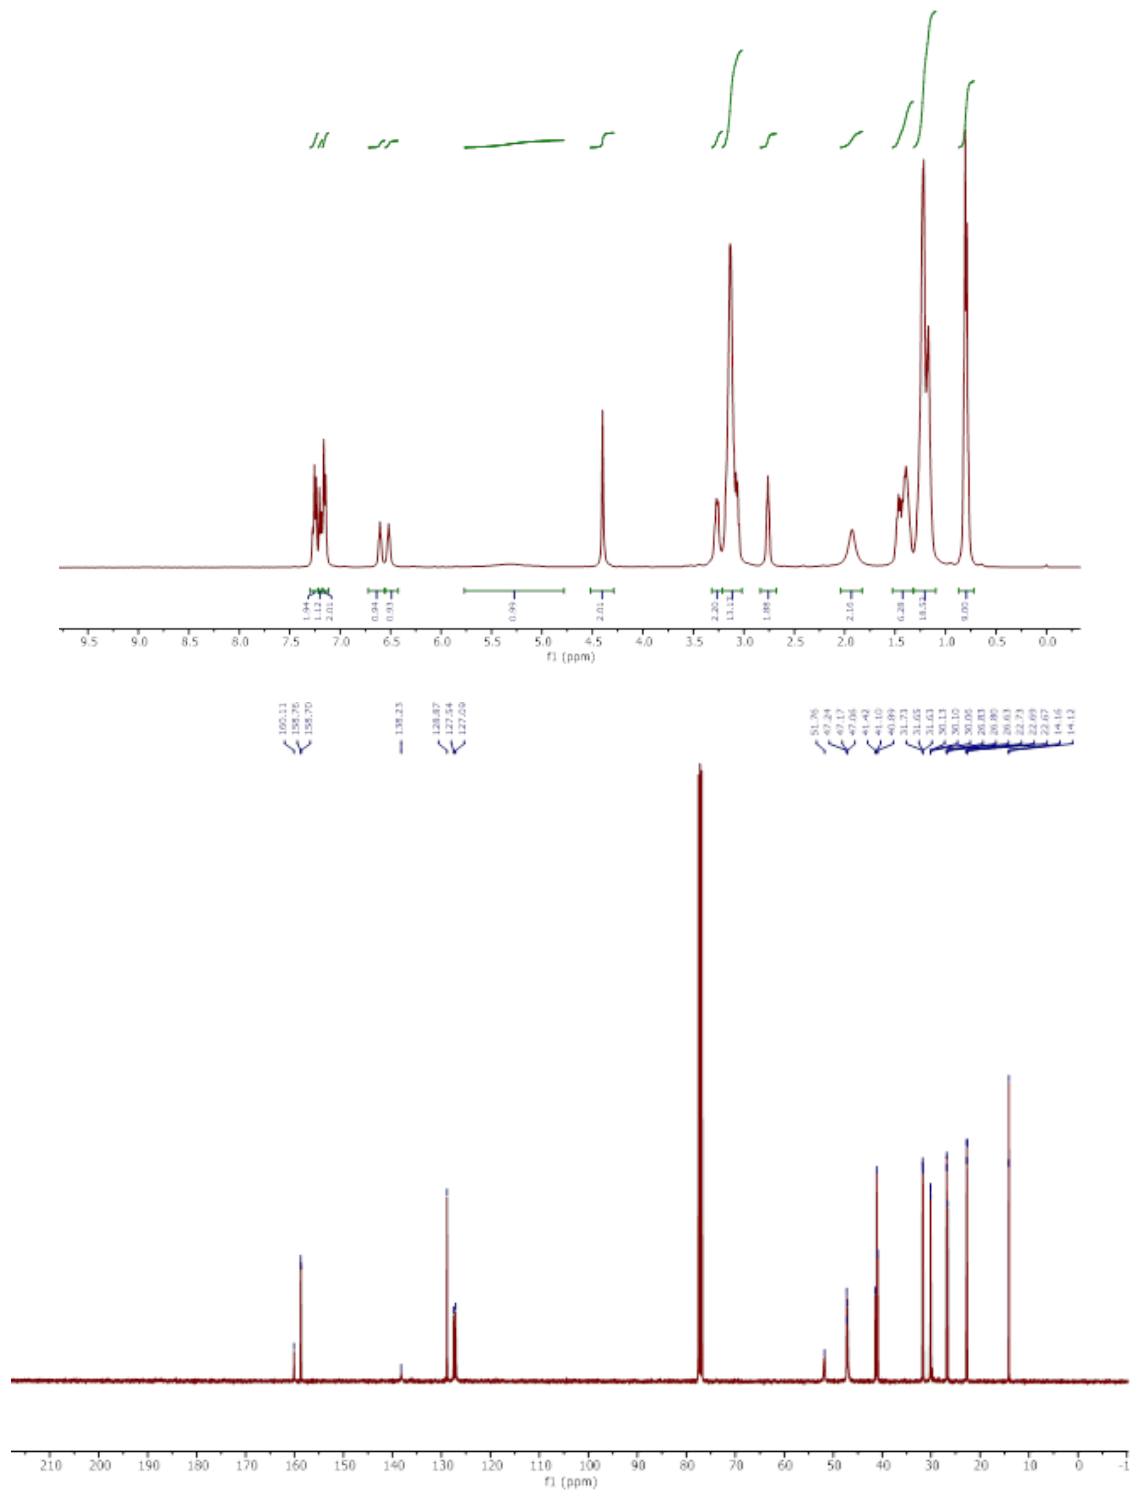

**Compound 5bd: *N*-benzyl-*N*-(*tert*butylcarbamoyl)-*N*'',*N*'''-bis(hexylcarbamoyl)triethylenetetramine (400 MHz, CDCl<sub>3</sub>)**

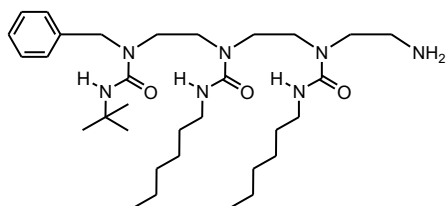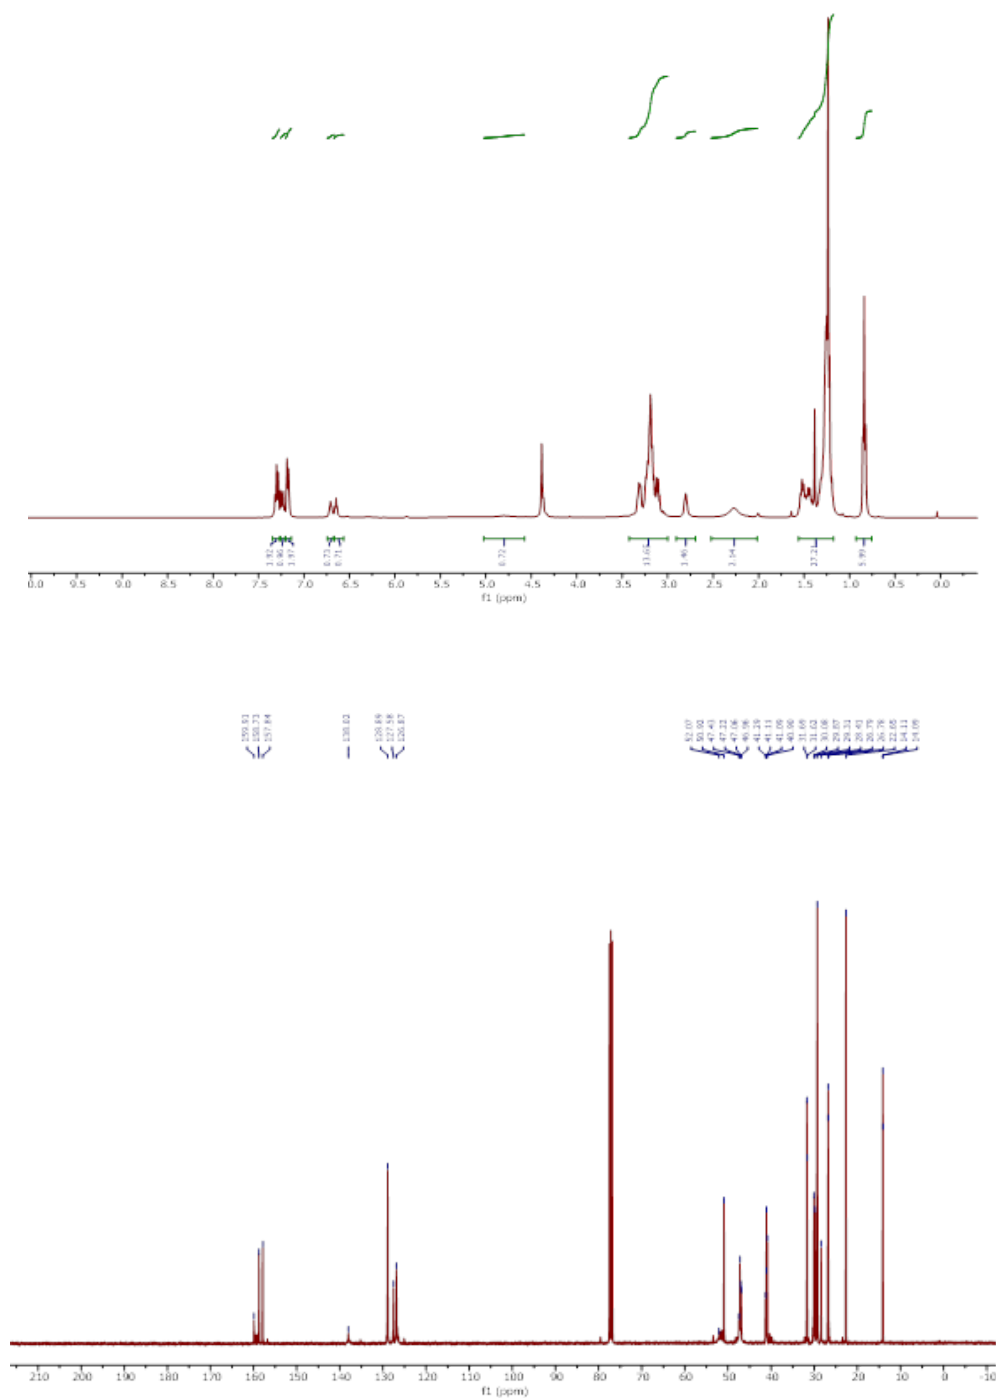

Compound

5a:

*N*-benzyl-*N,N',N'''*-tri(hexylcarbamoyl)-*N''*-(3,5-

*bis*(trifluoromethyl)phenylcarbamoyl)triethylenetetramine (400 MHz in CDCl<sub>3</sub>)

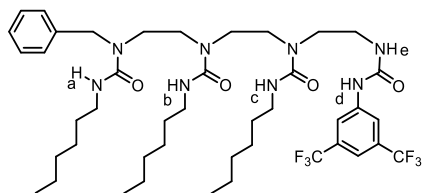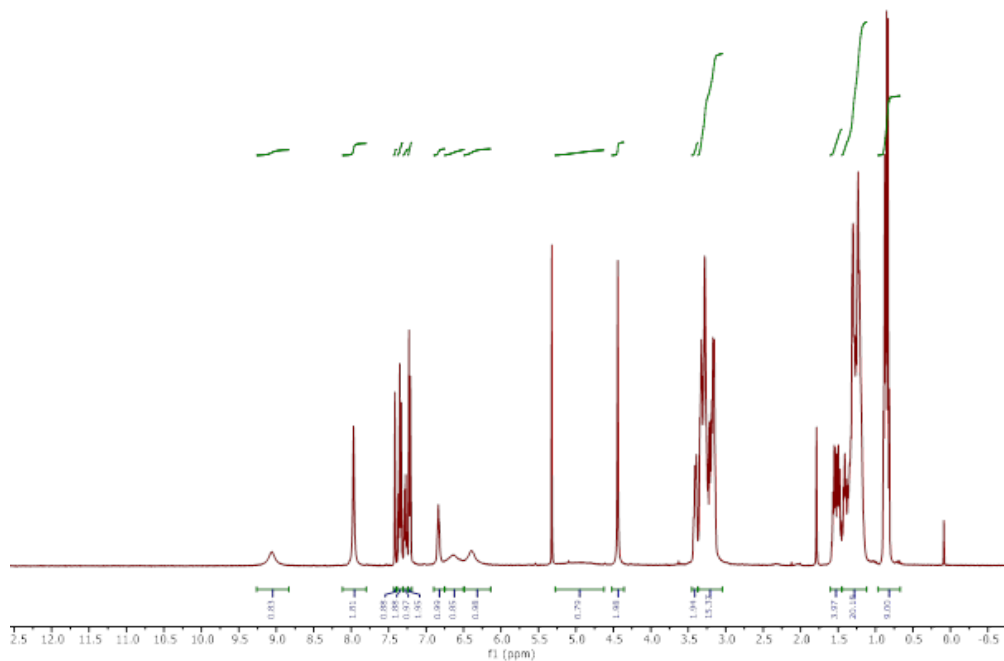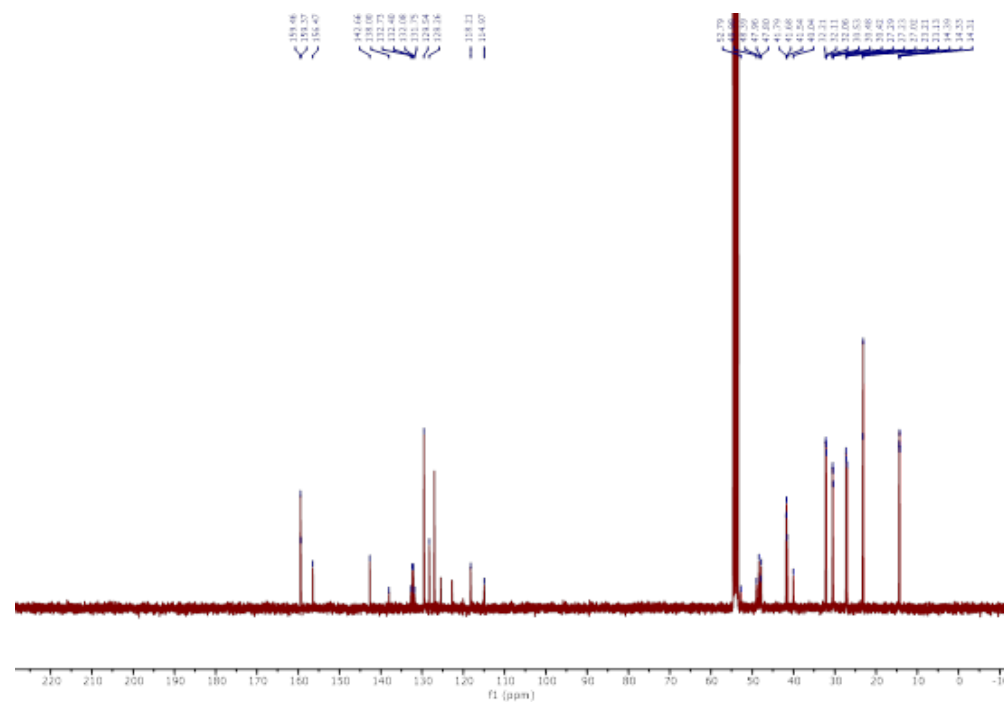

Compound          5b:          *N*-benzyl-*N*-(*tert*butylcarbamoyl)-*N'*,*N''*'-bis(hexylcarbamoyl)-*N'*-(3,5-bis(trifluoromethyl)phenylcarbamoyl)triethylenetetramine (400 MHz in CDCl<sub>3</sub>)

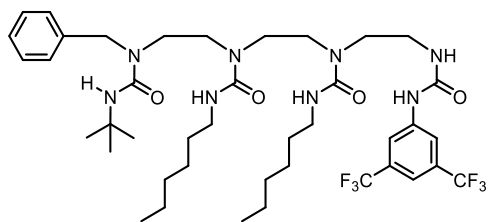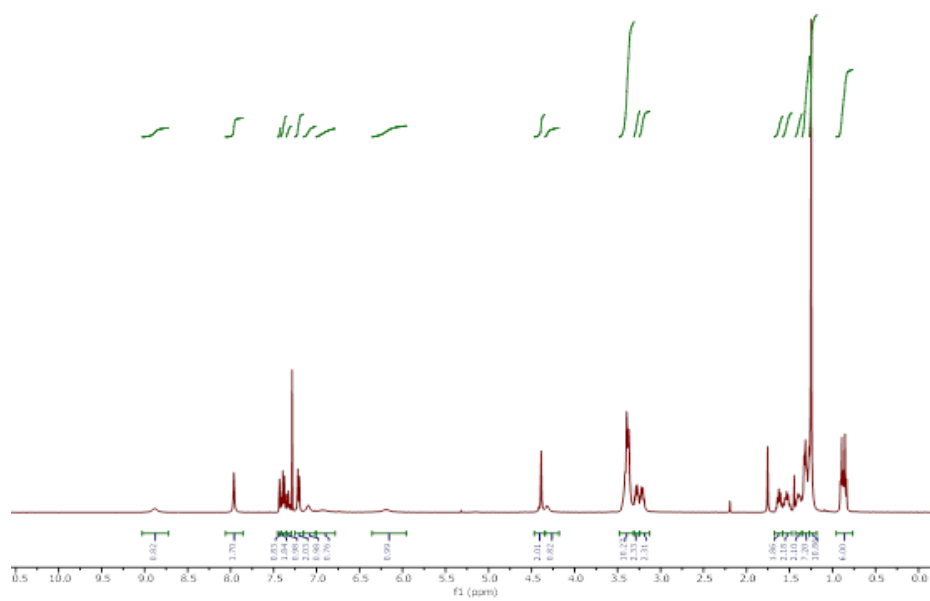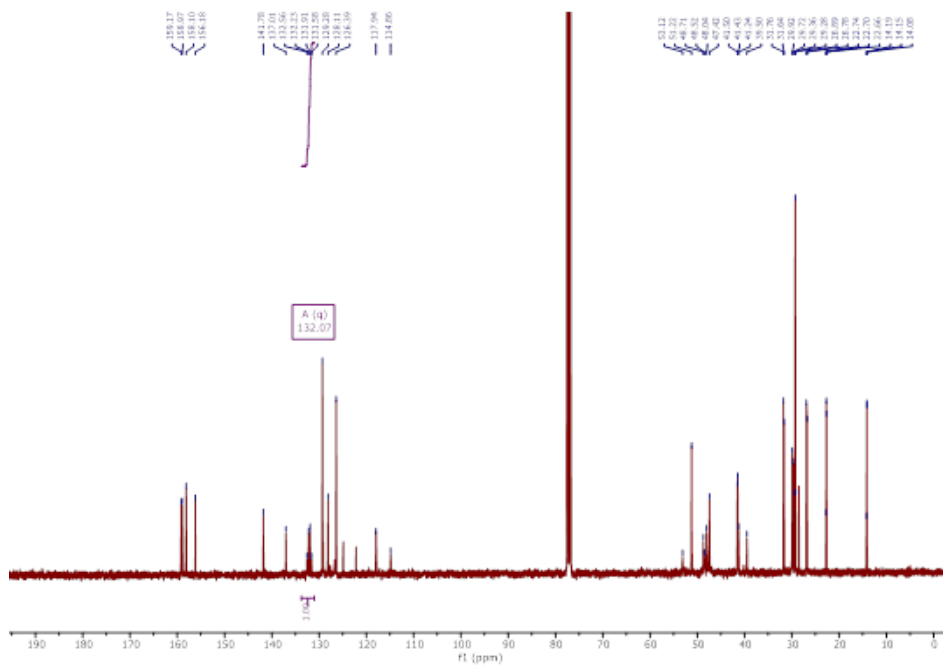

#### 4. Crystal data and structure refinements

Single crystals suitable for X-ray diffraction analysis were grown by slow evaporation of an acetonitrile solution containing the compound. Data were collected on a dual source Rigaku FR-X rotating anode diffractometer using CuK $\alpha$  wavelength radiation ( $\lambda = 1.54184$ ) or a Bruker Apex II Goniometer using Mo-K $\alpha$  radiation ( $\lambda = 0.717073 \text{ \AA}$ ) at a temperature of 100(2) K, 150(2) K, 175(2) K or 200(2) K. Data for **1e**, **e136**, **f40** were found to be twinned with 2 components. Data were collected for compound **1a** at 100K using synchrotron radiation at beamline I19 at the Diamond Light Source with a Pilatus 2M detector.<sup>11</sup> The data were either integrated using CrysAlisPro 1.71.40.14d and absorption correction was performed using empirical methods (SCALE3 ABSPACK) based upon symmetry-equivalent reflections combined with measurements at different azimuthal angles.<sup>10</sup> or intensities were integrated using SAINT and absorption corrections based on equivalent reflections were applied using SADABS. Structures were solved using ShelXT, all of the structures were refined by full matrix least squares in ShelXL using Olex2. <sup>11</sup> All of the non hydrogen atoms were refined anisotropically. Hydrogen atoms were located geometrically and refined using a riding model. Disorder was modelled by setting the sum of the parts to 1 and refining the occupancies, restraints and constraints were applied to maintain sensible thermal and geometric parameters.

CCDC 2189961 (**1a**), 2189974 (**1b**), 2189976 (**1c**), 2189991 (**1d**), 2189996 (**1e**), 2189987 (**2a**), 2189988 (**2b**), 2189990 (**2c**), 2190005 (**3a**), 2189998 (**3b**), 2190003 (**4a**), 2190004 (**4b**), contain the supplementary crystallographic data for this paper. These data can be obtained free of charge via [www.ccdc.cam.ac.uk/conts/retrieving.html](http://www.ccdc.cam.ac.uk/conts/retrieving.html) (or from the Cambridge Crystallographic Data Centre, 12 Union Road, Cambridge CB2 1EZ, UK; fax: (+44)1223-336-033; or [deposit@ccdc.cam.ac.uk](mailto:deposit@ccdc.cam.ac.uk)).

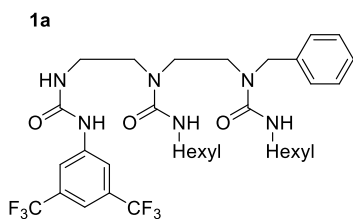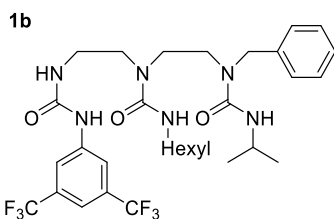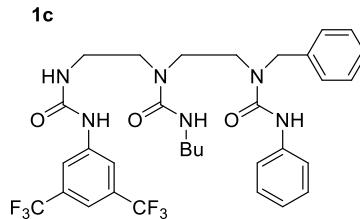

|                                                       | <b>1a</b> (shelxt_a d69)<br><b>(2189961)</b>                                 | <b>1b</b> (e67_bis)( <b>2189974</b> )                                        | <b>1c</b> (s5812r<br>g49)( <b>2189976</b> )                                  |
|-------------------------------------------------------|------------------------------------------------------------------------------|------------------------------------------------------------------------------|------------------------------------------------------------------------------|
| Identification code (CCDC)                            |                                                                              |                                                                              |                                                                              |
| Empirical formula                                     | C <sub>34</sub> H <sub>48</sub> F <sub>6</sub> N <sub>6</sub> O <sub>3</sub> | C <sub>31</sub> H <sub>42</sub> F <sub>6</sub> N <sub>6</sub> O <sub>3</sub> | C <sub>32</sub> H <sub>36</sub> F <sub>6</sub> N <sub>6</sub> O <sub>3</sub> |
| Formula weight                                        | 702.78                                                                       | 660.70                                                                       | 666.67                                                                       |
| Temperature/K                                         | 100(2)                                                                       | 100(2)                                                                       | 150(2)                                                                       |
| Crystal system                                        | triclinic                                                                    | triclinic                                                                    | triclinic                                                                    |
| Space group                                           | <i>P</i> -1                                                                  | <i>P</i> -1                                                                  | <i>P</i> -1                                                                  |
| <i>a</i> /Å                                           | 13.5304(3)                                                                   | 14.5044(5)                                                                   | 14.5061(3)                                                                   |
| <i>b</i> /Å                                           | 14.4783(3)                                                                   | 14.9547(5)                                                                   | 15.7206(4)                                                                   |
| <i>c</i> /Å                                           | 19.2467(5)                                                                   | 17.2099(6)                                                                   | 17.2781(4)                                                                   |
| $\alpha$ /°                                           | 86.952(1)                                                                    | 101.789(2)                                                                   | 92.442(1)                                                                    |
| $\beta$ /°                                            | 73.821(1)                                                                    | 111.249(2)                                                                   | 113.700(1)                                                                   |
| $\gamma$ /°                                           | 84.391(1)                                                                    | 97.465(2)                                                                    | 112.853(1)                                                                   |
| Volume/Å <sup>3</sup>                                 | 3602.39(16)                                                                  | 3319.6(2)                                                                    | 3231.16(13)                                                                  |
| Z                                                     | 4                                                                            | 4                                                                            | 4                                                                            |
| $\rho_{\text{calc}}$ /cm <sup>3</sup>                 | 1.294                                                                        | 1.322                                                                        | 1.370                                                                        |
| $\mu$ /mm <sup>-1</sup>                               | 0.891                                                                        | 0.109                                                                        | 0.970                                                                        |
| F(000)                                                | 1488.0                                                                       | 1392.0                                                                       | 1392.0                                                                       |
| Crystal size/mm <sup>3</sup>                          | 0.548 × 0.266 × 0.18                                                         | 0.418 × 0.396 × 0.178                                                        | 0.363 × 0.317 × 0.14                                                         |
| Radiation                                             | Cu K $\alpha$ ( $\lambda$ = 1.54184)                                         | MoK $\alpha$ ( $\lambda$ = 0.71073)                                          | Cu K $\alpha$ ( $\lambda$ = 1.54184)                                         |
| 2 $\theta$ range for data collection/°                | 4.782 to 136.996                                                             | 2.854 to 50.7                                                                | 5.748 to 149.368                                                             |
| Index ranges                                          | -16 ≤ <i>h</i> ≤ 16, -17 ≤ <i>k</i> ≤ 17, -23 ≤ <i>l</i> ≤ 23                | -17 ≤ <i>h</i> ≤ 17, -18 ≤ <i>k</i> ≤ 17, -20 ≤ <i>l</i> ≤ 20                | -18 ≤ <i>h</i> ≤ 18, -19 ≤ <i>k</i> ≤ 19, -21 ≤ <i>l</i> ≤ 21                |
| Reflections collected                                 | 77150                                                                        | 48350                                                                        | 67927                                                                        |
| Independent reflections                               | 13215 [R <sub>int</sub> = 0.0352, R <sub>sigma</sub> = 0.0229]               | 12166 [R <sub>int</sub> = 0.0572, R <sub>sigma</sub> = 0.0526]               | 13186 [R <sub>int</sub> = 0.0269, R <sub>sigma</sub> = 0.0203]               |
| Data/restraints/parameters                            | 13215/66/1207                                                                | 12166/328/949                                                                | 13186/750/1053                                                               |
| Goodness-of-fit on F <sup>2</sup>                     | 1.022                                                                        | 1.010                                                                        | 1.020                                                                        |
| Final R indexes [ <i>I</i> ≥ 2 $\sigma$ ( <i>I</i> )] | R <sub>1</sub> = 0.0340, wR <sub>2</sub> = 0.0863                            | R <sub>1</sub> = 0.0528, wR <sub>2</sub> = 0.1276                            | R <sub>1</sub> = 0.0375, wR <sub>2</sub> = 0.0968                            |
| Final R indexes [all data]                            | R <sub>1</sub> = 0.0371, wR <sub>2</sub> = 0.0887                            | R <sub>1</sub> = 0.1011, wR <sub>2</sub> = 0.1565                            | R <sub>1</sub> = 0.0404, wR <sub>2</sub> = 0.0991                            |
| Largest diff. peak/hole / e Å <sup>-3</sup>           | 0.34/-0.28                                                                   | 0.66/-0.38                                                                   | 0.26/-0.28                                                                   |

#### Hydrogen Bonds for **1a** (2189961)

| D   | H   | A               | d(D-H)/Å  | d(H-A)/Å  | d(D-A)/Å   | D-H-A/°   |
|-----|-----|-----------------|-----------|-----------|------------|-----------|
| C6  | H6  | O1              | 0.949(15) | 2.270(15) | 2.8598(14) | 119.6(11) |
| N1  | H1  | O6 <sup>1</sup> | 0.870(17) | 2.006(17) | 2.8255(13) | 156.6(14) |
| N2  | H2A | O6 <sup>1</sup> | 0.860(16) | 2.050(16) | 2.8386(13) | 152.0(14) |
| N6  | H6A | O2              | 0.865(17) | 1.971(18) | 2.8229(13) | 167.9(15) |
| C40 | H40 | O4              | 0.952(15) | 2.272(15) | 2.8700(15) | 120.1(11) |

Hydrogen Bonds for **1a** (2189961)

| D   | H   | A  | d(D-H)/Å  | d(H-A)/Å  | d(D-A)/Å   | D-H-A/°   |
|-----|-----|----|-----------|-----------|------------|-----------|
| N7  | H7  | O3 | 0.890(17) | 1.828(17) | 2.6844(13) | 160.8(15) |
| N8  | H8  | O3 | 0.861(16) | 2.079(16) | 2.8410(13) | 147.1(14) |
| N11 | H11 | O4 | 0.848(16) | 2.085(16) | 2.9247(13) | 170.7(14) |
| N12 | H12 | O5 | 0.819(16) | 2.145(17) | 2.9529(14) | 168.9(14) |

Torsion Angles for **1a** (2189961).

| A   | B   | C   | D   | Angle/°     | A   | B   | C   | D   | Angle/°     |
|-----|-----|-----|-----|-------------|-----|-----|-----|-----|-------------|
| C1  | C2  | C3  | C4  | -0.45(18)   | C36 | C35 | N7  | C43 | 176.01(11)  |
| C1  | C2  | C3  | C7  | 179.09(10)  | C36 | C37 | C38 | C39 | -0.83(17)   |
| C2  | C1  | C6  | C5  | -0.66(17)   | C36 | C37 | C41 | F7  | 59.5(4)     |
| C2  | C1  | N1  | C9  | -168.97(11) | C36 | C37 | C41 | F7A | 38.1(8)     |
| C2  | C3  | C4  | C5  | -0.50(17)   | C36 | C37 | C41 | F8  | -61.8(4)    |
| C2  | C3  | C7  | F1  | 36.16(15)   | C36 | C37 | C41 | F8A | -78.8(7)    |
| C2  | C3  | C7  | F2  | -83.52(13)  | C36 | C37 | C41 | F9  | 176.9(5)    |
| C2  | C3  | C7  | F3  | 156.15(11)  | C36 | C37 | C41 | F9A | 162.5(7)    |
| C3  | C4  | C5  | C6  | 0.88(18)    | C37 | C38 | C39 | C40 | 0.80(17)    |
| C3  | C4  | C5  | C8  | -177.71(11) | C37 | C38 | C39 | C42 | 177.95(11)  |
| C4  | C3  | C7  | F1  | -144.29(11) | C38 | C37 | C41 | F7  | -121.1(4)   |
| C4  | C3  | C7  | F2  | 96.03(13)   | C38 | C37 | C41 | F7A | -142.5(8)   |
| C4  | C3  | C7  | F3  | -24.30(16)  | C38 | C37 | C41 | F8  | 117.6(4)    |
| C4  | C5  | C6  | C1  | -0.30(18)   | C38 | C37 | C41 | F8A | 100.6(7)    |
| C4  | C5  | C8  | F4  | -63.71(14)  | C38 | C37 | C41 | F9  | -3.7(5)     |
| C4  | C5  | C8  | F5  | 175.32(11)  | C38 | C37 | C41 | F9A | -18.1(7)    |
| C4  | C5  | C8  | F6  | 55.52(15)   | C38 | C39 | C40 | C35 | 0.27(17)    |
| C6  | C1  | C2  | C3  | 1.04(17)    | C38 | C39 | C42 | F10 | 12.39(17)   |
| C6  | C1  | N1  | C9  | 10.95(19)   | C38 | C39 | C42 | F11 | -108.01(13) |
| C6  | C5  | C8  | F4  | 117.65(12)  | C38 | C39 | C42 | F12 | 133.21(12)  |
| C6  | C5  | C8  | F5  | -3.32(16)   | C40 | C35 | C36 | C37 | 1.29(17)    |
| C6  | C5  | C8  | F6  | -123.12(12) | C40 | C35 | N7  | C43 | -4.60(19)   |
| C7  | C3  | C4  | C5  | 179.97(11)  | C40 | C39 | C42 | F10 | -170.33(11) |
| C8  | C5  | C6  | C1  | 178.28(11)  | C40 | C39 | C42 | F11 | 69.27(15)   |
| C10 | C11 | N3  | C12 | 93.45(12)   | C40 | C39 | C42 | F12 | -49.51(15)  |
| C10 | C11 | N3  | C21 | -79.25(14)  | C41 | C37 | C38 | C39 | 179.81(11)  |
| C11 | C10 | N2  | C9  | -72.48(14)  | C42 | C39 | C40 | C35 | -176.96(11) |
| C12 | C13 | N4  | C14 | -109.79(12) | C44 | C45 | N9  | C46 | -100.63(12) |
| C12 | C13 | N4  | C28 | 72.51(14)   | C44 | C45 | N9  | C55 | 72.52(14)   |
| C13 | C12 | N3  | C11 | -103.13(12) | C45 | C44 | N8  | C43 | 69.84(14)   |
| C13 | C12 | N3  | C21 | 69.94(13)   | C46 | C47 | N10 | C48 | 88.58(12)   |
| C14 | C15 | C16 | C17 | 178.97(12)  | C46 | C47 | N10 | C62 | -86.82(13)  |
| C14 | C15 | C20 | C19 | -178.53(12) | C47 | C46 | N9  | C45 | 95.37(12)   |
| C15 | C14 | N4  | C13 | 102.79(12)  | C47 | C46 | N9  | C55 | -78.17(13)  |
| C15 | C14 | N4  | C28 | -79.40(13)  | C48 | C49 | C50 | C51 | 178.52(12)  |

Torsion Angles for **1a** (2189961).

| <b>A</b> | <b>B</b> | <b>C</b> | <b>D</b> | <b>Angle/°</b> | <b>A</b> | <b>B</b> | <b>C</b> | <b>D</b> | <b>Angle/°</b> |
|----------|----------|----------|----------|----------------|----------|----------|----------|----------|----------------|
| C15      | C16      | C17      | C18      | -0.1(2)        | C48      | C49      | C54      | C53      | -178.86(11)    |
| C16      | C15      | C20      | C19      | 0.99(19)       | C49      | C48      | N10      | C47      | 80.24(13)      |
| C16      | C17      | C18      | C19      | 0.4(2)         | C49      | C48      | N10      | C62      | -104.23(12)    |
| C17      | C18      | C19      | C20      | 0.1(2)         | C49      | C50      | C51      | C52      | 0.4(2)         |
| C18      | C19      | C20      | C15      | -0.7(2)        | C50      | C49      | C54      | C53      | -0.35(18)      |
| C20      | C15      | C16      | C17      | -0.57(19)      | C50      | C51      | C52      | C53      | -0.5(2)        |
| C22      | C23      | C24      | C25      | 177.54(11)     | C51      | C52      | C53      | C54      | 0.2(2)         |
| C23      | C22      | N5       | C21      | 151.98(11)     | C52      | C53      | C54      | C49      | 0.23(19)       |
| C23      | C24      | C25      | C26      | 176.89(11)     | C54      | C49      | C50      | C51      | 0.03(18)       |
| C24      | C25      | C26      | C27      | 175.64(13)     | C56      | C57      | C58      | C59      | 172.77(11)     |
| C29      | C30      | C31      | C32      | -60.17(15)     | C57      | C56      | N11      | C55      | -157.51(11)    |
| C30      | C29      | N6       | C28      | 119.62(12)     | C57      | C58      | C59      | C60      | 60.04(17)      |
| C30      | C31      | C32      | C33      | 176.79(11)     | C58      | C59      | C60      | C61      | 170.97(14)     |
| C31      | C32      | C33      | C34      | -177.10(11)    | C63      | C64      | C65      | C66      | 62.65(16)      |
| N1       | C1       | C2       | C3       | -179.04(11)    | C64      | C63      | N12      | C62      | 159.65(11)     |
| N1       | C1       | C6       | C5       | 179.42(11)     | C64      | C65      | C66      | C67      | 178.54(11)     |
| N1       | C9       | N2       | C10      | 178.53(10)     | C65      | C66      | C67      | C68      | -67.31(16)     |
| N2       | C9       | N1       | C1       | 178.13(11)     | N7       | C35      | C36      | C37      | -179.29(10)    |
| N2       | C10      | C11      | N3       | 162.57(10)     | N7       | C35      | C40      | C39      | 179.33(11)     |
| N3       | C12      | C13      | N4       | -159.81(10)    | N7       | C43      | N8       | C44      | 179.28(10)     |
| N3       | C21      | N5       | C22      | 176.47(11)     | N8       | C43      | N7       | C35      | 177.29(11)     |
| N4       | C14      | C15      | C16      | -178.24(11)    | N8       | C44      | C45      | N9       | -159.46(10)    |
| N4       | C14      | C15      | C20      | 1.27(16)       | N9       | C46      | C47      | N10      | 160.17(9)      |
| N4       | C28      | N6       | C29      | -170.76(11)    | N9       | C55      | N11      | C56      | -171.75(10)    |
| N5       | C21      | N3       | C11      | -2.08(17)      | N10      | C48      | C49      | C50      | 38.74(15)      |
| N5       | C21      | N3       | C12      | -174.95(10)    | N10      | C48      | C49      | C54      | -142.79(11)    |
| N5       | C22      | C23      | C24      | -179.13(10)    | N10      | C62      | N12      | C63      | 179.63(10)     |
| N6       | C28      | N4       | C13      | -1.31(17)      | N11      | C55      | N9       | C45      | 4.99(16)       |
| N6       | C28      | N4       | C14      | -179.09(10)    | N11      | C55      | N9       | C46      | 178.35(10)     |
| N6       | C29      | C30      | C31      | -59.19(14)     | N11      | C56      | C57      | C58      | -178.44(11)    |
| O1       | C9       | N1       | C1       | -1.1(2)        | N12      | C62      | N10      | C47      | 4.89(16)       |
| O1       | C9       | N2       | C10      | -2.26(18)      | N12      | C62      | N10      | C48      | -170.40(10)    |
| O2       | C21      | N3       | C11      | 179.31(11)     | N12      | C63      | C64      | C65      | 170.01(11)     |
| O2       | C21      | N3       | C12      | 6.43(16)       | O4       | C43      | N7       | C35      | -1.76(19)      |
| O2       | C21      | N5       | C22      | -4.93(18)      | O4       | C43      | N8       | C44      | -1.67(18)      |
| O3       | C28      | N4       | C13      | 179.43(10)     | O5       | C55      | N9       | C45      | -176.38(10)    |
| O3       | C28      | N4       | C14      | 1.65(16)       | O5       | C55      | N9       | C46      | -3.01(16)      |
| O3       | C28      | N6       | C29      | 8.47(18)       | O5       | C55      | N11      | C56      | 9.65(17)       |
| C35      | C36      | C37      | C38      | -0.21(17)      | O6       | C62      | N10      | C47      | -172.78(10)    |
| C35      | C36      | C37      | C41      | 179.18(10)     | O6       | C62      | N10      | C48      | 11.93(16)      |
| C36      | C35      | C40      | C39      | -1.31(17)      | O6       | C62      | N12      | C63      | -2.73(18)      |



Hydrogen Bonds for 2189974 (compound **1b**)

| D   | H    | A               | d(D-H)/Å | d(H-A)/Å | d(D-A)/Å | D-H-A/°   |
|-----|------|-----------------|----------|----------|----------|-----------|
| N5  | H5a  | O4              | 0.8800   | 2.064(3) | 2.852(3) | 148.69(8) |
| N5  | H5b  | O4              | 0.8800   | 2.110(3) | 2.852(3) | 141.59(8) |
| C29 | H29  | O3              | 0.9500   | 2.241(3) | 2.850(3) | 121.05(9) |
| C60 | H60  | O6              | 0.9500   | 2.250(3) | 2.864(3) | 121.55(8) |
| N7  | H7a  | O5              | 0.79(3)  | 2.04(3)  | 2.816(3) | 170(3)    |
| N1  | H1   | O2              | 0.78(3)  | 2.09(3)  | 2.848(3) | 164(3)    |
| N12 | H12  | O1 <sup>1</sup> | 0.87(3)  | 1.96(3)  | 2.794(3) | 160(3)    |
| N6  | H6   | O4              | 0.80(3)  | 2.07(3)  | 2.817(3) | 156(3)    |
| N11 | H11a | O1 <sup>1</sup> | 0.84(3)  | 2.11(3)  | 2.878(3) | 153(3)    |

Torsion Angles for 2189974 (compound **1b**)

| A  | B   | C   | D    | Angle/°   | A   | B   | C   | D    | Angle/°    |
|----|-----|-----|------|-----------|-----|-----|-----|------|------------|
| F1 | C30 | C26 | C25  | 55.7(3)   | F8  | C61 | C57 | C58  | 109.0(3)   |
| F1 | C30 | C26 | C27  | -122.6(2) | F9  | C61 | C57 | C56  | 170.3(2)   |
| F2 | C30 | C26 | C25  | -61.8(3)  | F9  | C61 | C57 | C58  | -11.9(3)   |
| F2 | C30 | C26 | C27  | 119.8(2)  | F10 | C62 | C59 | C58  | -13.5(4)   |
| F3 | C30 | C26 | C25  | 176.2(3)  | F10 | C62 | C59 | C60  | 165.4(3)   |
| F3 | C30 | C26 | C27  | -2.1(3)   | F11 | C62 | C59 | C58  | -134.2(3)  |
| F4 | C31 | C28 | C27  | 152.9(2)  | F11 | C62 | C59 | C60  | 44.7(3)    |
| F4 | C31 | C28 | C29  | -28.3(3)  | F12 | C62 | C59 | C58  | 110.9(3)   |
| F5 | C31 | C28 | C27  | 31.1(3)   | F12 | C62 | C59 | C60  | -70.2(3)   |
| F5 | C31 | C28 | C29  | -150.0(2) | O4  | C35 | N7  | C32  | -5.9(4)    |
| F6 | C31 | C28 | C27  | -87.5(3)  | O4  | C35 | N8  | C36  | -21.9(4)   |
| F6 | C31 | C28 | C29  | 91.4(3)   | O4  | C35 | N8  | C43  | 166.9(3)   |
| O1 | C4  | N1  | C1   | 5.7(4)    | O4  | C35 | N8A | C36  | 26.2(4)    |
| O1 | C4  | N2  | C5   | 18.5(3)   | O4  | C35 | N8A | C43A | -163.6(13) |
| O1 | C4  | N2  | C12  | -168.5(3) | O5  | C45 | N9  | C44  | 1.4(4)     |
| O1 | C4  | N2A | C5   | -27.2(3)  | O5  | C45 | N9  | C52  | 173.0(3)   |
| O1 | C4  | N2A | C12A | 165.3(6)  | O5  | C45 | N10 | C46  | -1.0(4)    |
| O2 | C14 | N3  | C13  | 3.0(4)    | O5  | C45 | N9A | C52  | -161.1(10) |
| O2 | C14 | N3  | C21  | -172.6(4) | O5  | C45 | N9A | C44A | 5.5(8)     |
| O2 | C14 | N4  | C15  | -5.6(4)   | O6  | C54 | N11 | C53  | 0.6(3)     |
| O2 | C14 | N3A | C13A | 3.7(5)    | O6  | C54 | N12 | C55  | 12.7(3)    |
| O2 | C14 | N3A | C21A | -179.2(6) | N7  | C35 | N8  | C36  | 161.6(3)   |
| O3 | C23 | N5  | C22  | 8.2(4)    | N7  | C35 | N8  | C43  | -9.6(4)    |
| O3 | C23 | N5  | C22A | -14.5(7)  | N7  | C35 | N8A | C36  | -172.9(11) |
| O3 | C23 | N6  | C24  | -5.1(4)   | N7  | C35 | N8A | C43A | -2.7(9)    |
| N1 | C4  | N2  | C5   | -168.0(3) | N8  | C35 | N8A | C36  | -79.4(17)  |
| N1 | C4  | N2  | C12  | 5.0(4)    | N8  | C35 | N8A | C43A | 90.9(16)   |
| N1 | C4  | N2A | C5   | 169.2(5)  | N8  | C36 | C37 | C38  | -16.5(3)   |
| N1 | C4  | N2A | C12A | 1.7(5)    | N8  | C36 | C37 | C42  | 164.5(2)   |
| N2 | C4  | N2A | C5   | 68.4(14)  | N8  | C36 | N8A | C35  | 76.0(18)   |

Torsion Angles for 2189974 (compound **1b**)

| A   | B    | C    | D    | Angle/°   | A    | B    | C    | D    | Angle/°    |
|-----|------|------|------|-----------|------|------|------|------|------------|
| N2  | C4   | N2A  | C12A | -99.0(13) | N8   | C36  | N8A  | C43A | -95.0(15)  |
| N2  | C5   | C6   | C7   | -26.5(4)  | N8   | C43  | C44  | N9   | -153.7(3)  |
| N2  | C5   | C6   | C11  | 154.2(3)  | N9   | C45  | N10  | C46  | -175.0(3)  |
| N2  | C5   | N2A  | C4   | -68.1(15) | N9   | C45  | N9A  | C52  | -65.8(16)  |
| N2  | C5   | N2A  | C12A | 99.2(13)  | N9   | C45  | N9A  | C44A | 100.9(13)  |
| N2  | C12  | C13  | N3   | 157.8(4)  | N9   | C52  | C53  | N11  | 161.7(3)   |
| N3  | C14  | N4   | C15  | 167.3(3)  | N9   | C52  | N9A  | C45  | 63.3(18)   |
| N3  | C14  | N3A  | C13A | -90.6(9)  | N9   | C52  | N9A  | C44A | -100.6(15) |
| N3  | C14  | N3A  | C21A | 86.6(9)   | N10  | C45  | N9A  | C52  | 39.0(4)    |
| N3  | C21  | C22  | N5   | 161.5(4)  | N10  | C45  | N9A  | C44A | -154.3(11) |
| N4  | C14  | N3A  | C13A | 161.0(5)  | N10  | C46  | C47  | C48  | -61.3(3)   |
| N4  | C14  | N3A  | C21A | -21.8(6)  | N11  | C53  | C52  | N9A  | 163.9(5)   |
| N4  | C15  | C16  | C17  | -71.4(3)  | N11  | C54  | N12  | C55  | -167.3(2)  |
| N5  | C23  | N6   | C24  | 175.1(2)  | N12  | C55  | C56  | C57  | -176.2(2)  |
| N5  | C22A | C21A | N3A  | 157.2(10) | N12  | C55  | C60  | C59  | 176.2(3)   |
| N6  | C24  | C25  | C26  | 178.1(2)  | C35  | N8A  | C36  | C37  | 68(2)      |
| N6  | C24  | C29  | C28  | -178.3(3) | C35  | N8A  | C43A | C44A | -68(2)     |
| C4  | N2A  | C5   | C6   | 117.2(7)  | C36  | C37  | C38  | C39  | -179.9(3)  |
| C4  | N2A  | C12A | C13A | 78.6(9)   | C36  | C37  | C42  | C41  | 179.0(3)   |
| C5  | C6   | C7   | C8   | -179.3(3) | C36  | N8A  | C43A | C44A | 103.2(17)  |
| C5  | C6   | C11  | C10  | 179.6(2)  | C37  | C38  | C39  | C40  | 1.1(3)     |
| C5  | N2A  | C12A | C13A | -87.8(9)  | C37  | C42  | C41  | C40  | 0.8(3)     |
| C6  | C7   | C8   | C9   | -0.3(3)   | C38  | C39  | C40  | C41  | -0.2(4)    |
| C6  | C11  | C10  | C9   | -0.3(3)   | C39  | C40  | C41  | C42  | -0.7(4)    |
| C7  | C8   | C9   | C10  | 0.3(4)    | C45  | N9A  | C52  | C53  | -111.6(13) |
| C8  | C9   | C10  | C11  | -0.0(4)   | C45  | N9A  | C44A | C43A | -76.2(15)  |
| C14 | N3A  | C13A | C12A | 67.3(8)   | C46  | C47  | C48  | C49  | -172.2(3)  |
| C14 | N3A  | C21A | C22A | -67.2(10) | C47  | C48  | C49  | C50  | -177.2(3)  |
| C15 | C16  | C17  | C18  | 175.7(2)  | C48  | C49  | C50  | C51  | -178.1(3)  |
| C16 | C17  | C18  | C19  | 162.0(3)  | C52  | N9A  | C44A | C43A | 88.2(19)   |
| C17 | C18  | C19  | C20  | 174.2(3)  | C55  | C56  | C57  | C58  | -0.7(3)    |
| C24 | C25  | C26  | C27  | 0.2(3)    | C55  | C56  | C57  | C61  | 177.1(3)   |
| C24 | C25  | C26  | C30  | -178.2(3) | C55  | C60  | C59  | C58  | 0.5(3)     |
| C24 | C29  | C28  | C27  | 0.3(3)    | C55  | C60  | C59  | C62  | -178.3(3)  |
| C24 | C29  | C28  | C31  | -178.5(3) | C56  | C57  | C58  | C59  | -0.3(3)    |
| C25 | C26  | C27  | C28  | 0.9(3)    | C57  | C58  | C59  | C60  | 0.4(3)     |
| C26 | C27  | C28  | C29  | -1.2(3)   | C57  | C58  | C59  | C62  | 179.2(3)   |
| C26 | C27  | C28  | C31  | 177.7(3)  | N2A  | C12A | C13A | N3A  | -161.1(7)  |
| F7  | C61  | C57  | C56  | 50.6(3)   | C12A | C13A | N3A  | C21A | -109.9(8)  |
| F7  | C61  | C57  | C58  | -131.6(3) | C13A | N3A  | C21A | C22A | 109.8(10)  |
| F8  | C61  | C57  | C56  | -68.8(3)  |      |      |      |      |            |

Hydrogen Bonds for 2189976 (1c)

| D   | H   | A               | d(D-H)/Å  | d(H-A)/Å  | d(D-A)/Å   | D-H-A/°   |
|-----|-----|-----------------|-----------|-----------|------------|-----------|
| N1  | H1  | O6              | 0.852(18) | 2.188(18) | 2.9546(14) | 149.5(15) |
| N2  | H2A | O6              | 0.845(19) | 1.962(19) | 2.7691(14) | 159.2(16) |
| N5  | H5  | O1              | 0.864(18) | 2.136(18) | 2.9920(13) | 171.0(16) |
| N6  | H6A | O2              | 0.850(16) | 1.966(17) | 2.8026(13) | 167.9(14) |
| N7  | H7  | O3 <sup>1</sup> | 0.847(18) | 2.351(18) | 3.0759(13) | 143.9(15) |
| N8  | H8  | O3 <sup>1</sup> | 0.88      | 2.11      | 2.909(4)   | 149.7     |
| N8A | H8A | O3 <sup>1</sup> | 0.88      | 2.05      | 2.877(7)   | 155.6     |
| N8B | H8B | O3 <sup>1</sup> | 0.88      | 1.92      | 2.768(7)   | 161.9     |
| N11 | H11 | O4              | 0.877(19) | 2.027(18) | 2.8946(14) | 170.2(16) |
| N12 | H12 | O5              | 0.880(18) | 1.91(3)   | 2.782(18)  | 168.2(16) |
| N12 | H12 | O5A             | 0.880(18) | 1.916(19) | 2.773(6)   | 164.4(15) |
| N12 | H12 | O5B             | 0.880(18) | 1.91(3)   | 2.786(19)  | 173.0(17) |

Torsion Angles for 2189976 (compound 1c)

| A   | B   | C  | D   | Angle/°     | A    | B    | C    | D    | Angle/°     |
|-----|-----|----|-----|-------------|------|------|------|------|-------------|
| C1  | C2  | C3 | C4  | -0.3(2)     | C42B | C43B | N9B  | C44B | -101.9(7)   |
| C1  | C2  | C3 | C7  | -178.50(12) | C42B | C43B | N9B  | C53B | 44.7(9)     |
| C2  | C1  | C6 | C5  | 2.07(19)    | C43  | C42  | N8   | C41  | -67.2(5)    |
| C2  | C1  | N1 | C9  | -28.2(2)    | C43A | C42A | N8A  | C41  | 67.7(8)     |
| C2  | C3  | C4 | C5  | 1.44(19)    | C43B | C42B | N8B  | C41  | 69.6(8)     |
| C2  | C3  | C7 | F1  | -46.47(17)  | C44  | C45  | N10  | C46  | -81.8(6)    |
| C2  | C3  | C7 | F2  | -168.02(12) | C44  | C45  | N10  | C58  | 79.8(6)     |
| C2  | C3  | C7 | F3  | 73.06(15)   | C44A | C45A | N10A | C46  | -78.8(7)    |
| C3  | C4  | C5 | C6  | -0.81(19)   | C44A | C45A | N10A | C58  | 93.6(6)     |
| C3  | C4  | C5 | C8  | 179.90(12)  | C44B | C45B | N10B | C46  | 104.5(4)    |
| C4  | C3  | C7 | F1  | 135.31(13)  | C44B | C45B | N10B | C58  | -79.2(5)    |
| C4  | C3  | C7 | F2  | 13.76(18)   | C45  | C44  | N9   | C43  | -116.2(5)   |
| C4  | C3  | C7 | F3  | -105.17(14) | C45  | C44  | N9   | C53  | 77.5(6)     |
| C4  | C5  | C6 | C1  | -0.94(19)   | C45A | C44A | N9A  | C43A | -84.9(7)    |
| C4  | C5  | C8 | F4  | 38.94(16)   | C45A | C44A | N9A  | C53A | 67.1(7)     |
| C4  | C5  | C8 | F5  | -80.37(15)  | C45B | C44B | N9B  | C43B | 90.3(5)     |
| C4  | C5  | C8 | F6  | 159.03(12)  | C45B | C44B | N9B  | C53B | -55.3(6)    |
| C6  | C1  | C2 | C3  | -1.46(19)   | C46  | C47  | C48  | C49  | 175.93(12)  |
| C6  | C1  | N1 | C9  | 151.77(12)  | C46  | C47  | C52  | C51  | -176.26(12) |
| C6  | C5  | C8 | F4  | -140.36(12) | C47  | C46  | N10  | C45  | -94.6(4)    |
| C6  | C5  | C8 | F5  | 100.33(14)  | C47  | C46  | N10  | C58  | 102.49(16)  |
| C6  | C5  | C8 | F6  | -20.27(17)  | C47  | C46  | N10A | C45A | -84.7(3)    |
| C7  | C3  | C4 | C5  | 179.59(12)  | C47  | C46  | N10A | C58  | 102.49(16)  |
| C8  | C5  | C6 | C1  | 178.34(12)  | C47  | C46  | N10B | C45B | -107.2(4)   |
| C10 | C11 | N3 | C12 | -103.02(12) | C47  | C46  | N10B | C58  | 76.2(5)     |
| C10 | C11 | N3 | C21 | 86.61(14)   | C47  | C48  | C49  | C50  | 0.8(2)      |
| C11 | C10 | N2 | C9  | 75.98(15)   | C48  | C47  | C52  | C51  | 0.37(19)    |

## Torsion Angles for 2189976 (compound 1c)

| A   | B   | C   | D   | Angle/°     | A    | B    | C    | D    | Angle/°     |
|-----|-----|-----|-----|-------------|------|------|------|------|-------------|
| C12 | C13 | N4  | C14 | -99.60(12)  | C48  | C49  | C50  | C51  | -0.3(2)     |
| C12 | C13 | N4  | C26 | 88.30(13)   | C49  | C50  | C51  | C52  | -0.2(2)     |
| C13 | C12 | N3  | C11 | -92.82(13)  | C50  | C51  | C52  | C47  | 0.1(2)      |
| C13 | C12 | N3  | C21 | 78.03(13)   | C52  | C47  | C48  | C49  | -0.82(19)   |
| C14 | C15 | C16 | C17 | 177.57(11)  | C54  | C55  | C56  | C57  | 177.7(5)    |
| C14 | C15 | C20 | C19 | -177.31(12) | C54A | C55A | C56A | C57A | -174.8(6)   |
| C15 | C14 | N4  | C13 | 81.79(13)   | C55  | C54  | N11  | C53  | 87.1(8)     |
| C15 | C14 | N4  | C26 | -105.76(12) | C55A | C54A | N11  | C53A | 136.8(6)    |
| C15 | C16 | C17 | C18 | -0.49(19)   | C59  | C60  | C61  | C62  | 1.3(2)      |
| C16 | C15 | C20 | C19 | -0.19(19)   | C60  | C59  | C64  | C63  | 0.56(19)    |
| C16 | C17 | C18 | C19 | 0.0(2)      | C60  | C59  | N12  | C58  | -42.09(18)  |
| C17 | C18 | C19 | C20 | 0.4(2)      | C60  | C61  | C62  | C63  | 0.3(2)      |
| C18 | C19 | C20 | C15 | -0.3(2)     | C61  | C62  | C63  | C64  | -1.6(2)     |
| C20 | C15 | C16 | C17 | 0.60(18)    | C62  | C63  | C64  | C59  | 1.1(2)      |
| C22 | C23 | C24 | C25 | 178.31(14)  | C64  | C59  | C60  | C61  | -1.78(19)   |
| C23 | C22 | N5  | C21 | -134.18(12) | C64  | C59  | N12  | C58  | 141.30(13)  |
| C27 | C28 | C29 | C30 | 0.26(18)    | N7   | C33  | C34  | C35  | -179.38(11) |
| C28 | C27 | C32 | C31 | -0.34(18)   | N7   | C33  | C38  | C37  | -179.17(10) |
| C28 | C27 | N6  | C26 | -19.35(18)  | N7   | C41  | N8   | C42  | -163.4(3)   |
| C28 | C29 | C30 | C31 | -0.1(2)     | N7   | C41  | N8A  | C42A | 179.8(5)    |
| C29 | C30 | C31 | C32 | -0.3(2)     | N7   | C41  | N8B  | C42B | 171.3(4)    |
| C30 | C31 | C32 | C27 | 0.5(2)      | N8   | C41  | N7   | C33  | 171.8(2)    |
| C32 | C27 | C28 | C29 | -0.05(17)   | N8   | C42  | C43  | N9   | 159.5(3)    |
| C32 | C27 | N6  | C26 | 164.55(11)  | N8A  | C41  | N7   | C33  | -165.9(4)   |
| N1  | C1  | C2  | C3  | 178.47(12)  | N8A  | C42A | C43A | N9A  | -156.2(5)   |
| N1  | C1  | C6  | C5  | -177.86(12) | N8B  | C41  | N7   | C33  | -158.6(4)   |
| N1  | C9  | N2  | C10 | -177.66(11) | N8B  | C42B | C43B | N9B  | -149.6(7)   |
| N2  | C9  | N1  | C1  | 179.96(12)  | N9   | C44  | C45  | N10  | -158.2(5)   |
| N2  | C10 | C11 | N3  | -159.77(10) | N9   | C53  | N11  | C54  | -165.2(5)   |
| N3  | C12 | C13 | N4  | -154.82(10) | N9A  | C44A | C45A | N10A | -153.2(5)   |
| N3  | C21 | N5  | C22 | 173.84(11)  | N9A  | C53A | N11  | C54A | -162.2(6)   |
| N4  | C14 | C15 | C16 | 28.87(16)   | N9B  | C44B | C45B | N10B | 159.0(4)    |
| N4  | C14 | C15 | C20 | -154.13(11) | N10  | C46  | C47  | C48  | 151.58(13)  |
| N4  | C26 | N6  | C27 | 169.46(10)  | N10  | C46  | C47  | C52  | -31.80(18)  |
| N5  | C21 | N3  | C11 | -9.19(18)   | N10  | C58  | N12  | C59  | 166.60(13)  |
| N5  | C21 | N3  | C12 | -179.84(11) | N10A | C46  | C47  | C48  | 151.58(13)  |
| N5  | C22 | C23 | C24 | 179.11(12)  | N10A | C46  | C47  | C52  | -31.80(18)  |
| N6  | C26 | N4  | C13 | -3.70(16)   | N10A | C58  | N12  | C59  | 166.60(13)  |
| N6  | C26 | N4  | C14 | -175.74(10) | N10B | C46  | C47  | C48  | 149.8(3)    |
| N6  | C27 | C28 | C29 | -176.07(10) | N10B | C46  | C47  | C52  | -33.6(3)    |
| N6  | C27 | C32 | C31 | 175.94(11)  | N10B | C58  | N12  | C59  | -174.6(3)   |
| O1  | C9  | N1  | C1  | 0.0(2)      | N11  | C53  | N9   | C43  | 11.8(8)     |
| O1  | C9  | N2  | C10 | 2.33(19)    | N11  | C53  | N9   | C44  | 177.9(4)    |

## Torsion Angles for 2189976 (compound 1c)

| A    | B    | C   | D    | Angle/°     | A   | B    | C    | D    | Angle/°     |
|------|------|-----|------|-------------|-----|------|------|------|-------------|
| O2   | C21  | N3  | C11  | 170.48(11)  | N11 | C53A | N9A  | C43A | -56.6(6)    |
| O2   | C21  | N3  | C12  | -0.17(17)   | N11 | C53A | N9A  | C44A | 147.5(4)    |
| O2   | C21  | N5  | C22  | -5.82(19)   | N11 | C53B | N9B  | C43B | 49.3(8)     |
| O3   | C26  | N4  | C13  | 175.68(11)  | N11 | C53B | N9B  | C44B | -163.2(5)   |
| O3   | C26  | N4  | C14  | 3.64(17)    | N11 | C54  | C55  | C56  | 60.4(9)     |
| O3   | C26  | N6  | C27  | -9.92(18)   | N11 | C54A | C55A | C56A | -178.7(6)   |
| C33  | C34  | C35 | C36  | -1.62(18)   | N12 | C58  | N10  | C45  | 3.9(4)      |
| C33  | C34  | C35 | C39  | 176.60(11)  | N12 | C58  | N10  | C46  | 165.67(13)  |
| C34  | C33  | C38 | C37  | -1.04(17)   | N12 | C58  | N10A | C45A | -7.0(4)     |
| C34  | C33  | N7  | C41  | 28.76(19)   | N12 | C58  | N10A | C46  | 165.67(13)  |
| C34  | C35  | C36 | C37  | -0.83(18)   | N12 | C58  | N10B | C45B | 7.6(6)      |
| C34  | C35  | C39 | F7   | 32.29(17)   | N12 | C58  | N10B | C46  | -176.0(3)   |
| C34  | C35  | C39 | F8   | -87.53(15)  | N12 | C59  | C60  | C61  | -178.33(12) |
| C34  | C35  | C39 | F9   | 153.68(12)  | N12 | C59  | C64  | C63  | 177.23(12)  |
| C35  | C36  | C37 | C38  | 2.38(17)    | O4  | C41  | N7   | C33  | 10.4(2)     |
| C35  | C36  | C37 | C40  | 179.45(11)  | O4  | C41  | N8   | C42  | -1.8(5)     |
| C36  | C35  | C39 | F7   | -149.45(12) | O4  | C41  | N8A  | C42A | 3.4(9)      |
| C36  | C35  | C39 | F8   | 90.74(15)   | O4  | C41  | N8B  | C42B | 2.7(8)      |
| C36  | C35  | C39 | F9   | -28.06(17)  | O5  | C53  | N9   | C43  | -167.0(13)  |
| C36  | C37  | C38 | C33  | -1.46(18)   | O5  | C53  | N9   | C44  | -1.0(15)    |
| C36  | C37  | C40 | F10  | 15.86(16)   | O5  | C53  | N11  | C54  | 13.6(15)    |
| C36  | C37  | C40 | F11  | -103.41(13) | O5A | C53A | N9A  | C43A | 150.3(5)    |
| C36  | C37  | C40 | F12  | 136.28(12)  | O5A | C53A | N9A  | C44A | -5.6(8)     |
| C38  | C33  | C34 | C35  | 2.54(17)    | O5A | C53A | N11  | C54A | -8.7(8)     |
| C38  | C33  | N7  | C41  | -153.15(13) | O5B | C53B | N9B  | C43B | -163.9(12)  |
| C38  | C37  | C40 | F10  | -167.01(11) | O5B | C53B | N9B  | C44B | -16.4(14)   |
| C38  | C37  | C40 | F11  | 73.73(14)   | O6  | C58  | N10  | C45  | 176.6(3)    |
| C38  | C37  | C40 | F12  | -46.58(15)  | O6  | C58  | N10  | C46  | -21.6(2)    |
| C39  | C35  | C36 | C37  | -179.05(11) | O6  | C58  | N10A | C45A | 165.8(3)    |
| C40  | C37  | C38 | C33  | -178.54(11) | O6  | C58  | N10A | C46  | -21.6(2)    |
| C42  | C43  | N9  | C44  | 110.7(4)    | O6  | C58  | N10B | C45B | -161.3(4)   |
| C42  | C43  | N9  | C53  | -83.8(5)    | O6  | C58  | N10B | C46  | 15.2(5)     |
| C42A | C43A | N9A | C44A | -81.9(6)    | O6  | C58  | N12  | C59  | -6.0(2)     |
| C42A | C43A | N9A | C53A | 124.2(5)    |     |      |      |      |             |

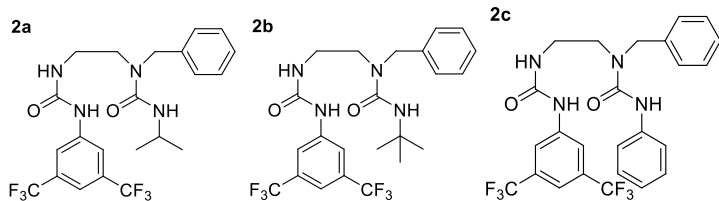

| Identification code (CCDC)                                   | <b>2a</b> (e153)( <b>2189987</b> )                                           | <b>2b</b> (dte154 (1))( <b>2189988</b> )                                      | <b>2c</b> (g37b)( <b>2189990</b> )                                                   |
|--------------------------------------------------------------|------------------------------------------------------------------------------|-------------------------------------------------------------------------------|--------------------------------------------------------------------------------------|
| Empirical formula                                            | C <sub>22</sub> H <sub>24</sub> F <sub>6</sub> N <sub>4</sub> O <sub>2</sub> | C <sub>23</sub> H <sub>26</sub> F <sub>6</sub> N <sub>4</sub> O <sub>2</sub>  | C <sub>25.33</sub> H <sub>22.5</sub> F <sub>6</sub> N <sub>4.17</sub> O <sub>2</sub> |
| Formula weight                                               | 490.45                                                                       | 504.48                                                                        | 524.46                                                                               |
| Temperature/K                                                | 100(2)                                                                       | 100(2)                                                                        | 100(2)                                                                               |
| Crystal system                                               | trigonal                                                                     | monoclinic                                                                    | trigonal                                                                             |
| Space group                                                  | <i>R</i> -3                                                                  | <i>P</i> 2 <sub>1</sub> / <i>n</i>                                            | <i>R</i> -3                                                                          |
| <i>a</i> /Å                                                  | 31.7595(6)                                                                   | 18.0463(4)                                                                    | 31.6255(7)                                                                           |
| <i>b</i> /Å                                                  | 31.7595(6)                                                                   | 21.9267(6)                                                                    | 31.6255(7)                                                                           |
| <i>c</i> /Å                                                  | 24.6991(6)                                                                   | 18.6546(5)                                                                    | 12.2942(4)                                                                           |
| $\alpha$ /°                                                  | 90                                                                           | 90                                                                            | 90                                                                                   |
| $\beta$ /°                                                   | 90                                                                           | 105.3610(10)                                                                  | 90                                                                                   |
| $\gamma$ /°                                                  | 120                                                                          | 90                                                                            | 120                                                                                  |
| Volume/Å <sup>3</sup>                                        | 21575.4(10)                                                                  | 7117.8(3)                                                                     | 10648.9(6)                                                                           |
| Z                                                            | 36                                                                           | 12                                                                            | 18                                                                                   |
| $\rho_{\text{calc}}$ /cm <sup>3</sup>                        | 1.359                                                                        | 1.412                                                                         | 1.472                                                                                |
| $\mu$ /mm <sup>-1</sup>                                      | 0.120                                                                        | 0.124                                                                         | 0.127                                                                                |
| F(000)                                                       | 9144.0                                                                       | 3144.0                                                                        | 4860.0                                                                               |
| Crystal size/mm <sup>3</sup>                                 | 0.577 × 0.455 × 0.241                                                        | 0.474 × 0.426 × 0.26                                                          | 0.525 × 0.339 × 0.26                                                                 |
| Radiation                                                    | MoK $\alpha$ ( $\lambda$ = 0.71073)                                          | MoK $\alpha$ ( $\lambda$ = 0.71073)                                           | MoK $\alpha$ ( $\lambda$ = 0.71073)                                                  |
| 2 $\theta$ range for data collection/°                       | 2.216 to 52.744                                                              | 2.928 to 55.874                                                               | 3.632 to 52.822                                                                      |
| Index ranges                                                 | -38 ≤ <i>h</i> ≤ 39, -39 ≤ <i>k</i> ≤ 39, -23 ≤ <i>l</i> ≤ 30                | -23 ≤ <i>h</i> ≤ 23, -28 ≤ <i>k</i> ≤ 21, -21 ≤ <i>l</i> ≤ 24                 | -39 ≤ <i>h</i> ≤ 39, -39 ≤ <i>k</i> ≤ 39, -15 ≤ <i>l</i> ≤ 15                        |
| Reflections collected                                        | 58951                                                                        | 64703                                                                         | 85699                                                                                |
| Independent reflections                                      | 9812 [ <i>R</i> <sub>int</sub> = 0.0521, <i>R</i> <sub>sigma</sub> = 0.0334] | 17042 [ <i>R</i> <sub>int</sub> = 0.0684, <i>R</i> <sub>sigma</sub> = 0.0646] | 4853 [ <i>R</i> <sub>int</sub> = 0.0471, <i>R</i> <sub>sigma</sub> = 0.0213]         |
| Data/restraints/parameters                                   | 9812/598/852                                                                 | 17042/70/1015                                                                 | 4853/0/403                                                                           |
| Goodness-of-fit on <i>F</i> <sup>2</sup>                     | 1.041                                                                        | 1.018                                                                         | 1.034                                                                                |
| Final <i>R</i> indexes [ <i>I</i> ≥ 2 $\sigma$ ( <i>I</i> )] | <i>R</i> <sub>1</sub> = 0.0507, <i>wR</i> <sub>2</sub> = 0.1223              | <i>R</i> <sub>1</sub> = 0.0533, <i>wR</i> <sub>2</sub> = 0.1138               | <i>R</i> <sub>1</sub> = 0.0397, <i>wR</i> <sub>2</sub> = 0.0839                      |
| Final <i>R</i> indexes [all data]                            | <i>R</i> <sub>1</sub> = 0.0682, <i>wR</i> <sub>2</sub> = 0.1346              | <i>R</i> <sub>1</sub> = 0.1034, <i>wR</i> <sub>2</sub> = 0.1395               | <i>R</i> <sub>1</sub> = 0.0518, <i>wR</i> <sub>2</sub> = 0.0909                      |
| Largest diff. peak/hole / e Å <sup>-3</sup>                  | 0.48/-0.29                                                                   | 0.51/-0.36                                                                    | 0.25/-0.26                                                                           |

#### Hydrogen Bonds for 2189987 (compound **2a**)

| D  | H  | A               | d(D-H)/Å | d(H-A)/Å | d(D-A)/Å | D-H-A/° |
|----|----|-----------------|----------|----------|----------|---------|
| N5 | H5 | O1 <sup>1</sup> | 0.85(3)  | 2.01(3)  | 2.812(2) | 155(3)  |

## Torsion Angles for 2189987 (compound 2a)

| A    | B    | C   | D    | Angle/°   | A   | B   | C    | D   | Angle/°    |
|------|------|-----|------|-----------|-----|-----|------|-----|------------|
| N2   | C5   | C6  | C1AA | 73.0(3)   | C25 | N6  | C24  | O3  | 4.8(5)     |
| N2   | C5   | C6  | C7   | -106.9(3) | C25 | N6  | C24  | N5  | -175.2(3)  |
| N2   | C11  | C12 | N3   | -162.9(2) | C25 | N6  | C32  | C33 | 94.9(4)    |
| N4   | C14  | C15 | C16  | -178.7(3) | C25 | C26 | C27  | C28 | 179.7(4)   |
| C0AA | C14  | C15 | C16  | -0.1(4)   | C25 | C26 | C31  | C30 | 179.8(3)   |
| C0AA | C18  | C20 | F4   | 152.7(3)  | C26 | C27 | C28  | C29 | 0.8(7)     |
| C0AA | C18  | C20 | F5   | 32.1(4)   | C27 | C26 | C31  | C30 | -1.3(6)    |
| C0AA | C18  | C20 | F6   | -88.3(4)  | C27 | C28 | C29  | C30 | -1.9(7)    |
| C0AA | C18  | C20 | F4A  | 81.2(10)  | C28 | C29 | C30  | C31 | 1.4(7)     |
| C0AA | C18  | C20 | F5A  | -33.0(9)  | C29 | C30 | C31  | C26 | 0.3(6)     |
| C0AA | C18  | C20 | F6A  | -155.4(9) | C31 | C26 | C27  | C28 | 0.8(6)     |
| C1AA | C6   | C7  | C8   | 0.8(4)    | C32 | N6  | C24  | O3  | -179.4(3)  |
| C2   | N1   | C4  | O1   | 3.5(4)    | C32 | N6  | C24  | N5  | 0.7(5)     |
| C2   | N1   | C4  | N2   | -177.2(2) | C32 | N6  | C25  | C26 | -82.5(4)   |
| C4   | N1   | C2  | C1   | -161.4(3) | C33 | N7  | C34  | O4  | -9.4(5)    |
| C4   | N1   | C2  | C3   | 76.2(3)   | C33 | N7  | C34  | N8  | 172.0(3)   |
| C4   | N2   | C5  | C6   | -97.3(3)  | C34 | N7  | C33  | C32 | -70.5(4)   |
| C4   | N2   | C11 | C12  | 78.1(3)   | C34 | N8  | C35  | C36 | -2.5(4)    |
| C5   | N2   | C4  | O1   | -8.5(4)   | C34 | N8  | C35  | C40 | 176.5(3)   |
| C5   | N2   | C4  | N1   | 172.2(2)  | C35 | N8  | C34  | O4  | 2.4(5)     |
| C5   | N2   | C11 | C12  | -93.3(3)  | C35 | N8  | C34  | N7  | -179.0(3)  |
| C5   | C6   | C7  | C8   | -179.4(3) | C35 | N8  | C34A | O4A | -12.8(19)  |
| C6   | C1AA | C10 | C9   | 0.3(4)    | C35 | N8  | C34A | N7A | 170.5(8)   |
| C6   | C7   | C8  | C9   | 1.1(5)    | C35 | C36 | C37  | C38 | 0.2(4)     |
| C7   | C8   | C9  | C10  | -2.3(5)   | C35 | C36 | C37  | C41 | -176.5(3)  |
| C8   | C9   | C10 | C1AA | 1.6(5)    | C36 | C35 | C40  | C39 | 0.2(4)     |
| C10  | C1AA | C6  | C5   | 178.7(3)  | C36 | C37 | C38  | C39 | -0.7(4)    |
| C10  | C1AA | C6  | C7   | -1.5(4)   | C36 | C37 | C41  | F7  | -30.2(5)   |
| C11  | N2   | C4  | O1   | -179.6(2) | C36 | C37 | C41  | F8  | 89.2(4)    |
| C11  | N2   | C4  | N1   | 1.0(4)    | C36 | C37 | C41  | F9  | -150.3(5)  |
| C11  | N2   | C5  | C6   | 74.3(3)   | C36 | C37 | C41  | F7A | -115.5(11) |
| C12  | N3   | C13 | O2   | 4.8(4)    | C36 | C37 | C41  | F9A | 135.3(15)  |
| C12  | N3   | C13 | N4   | -175.7(2) | C36 | C37 | C41  | F8A | -9.3(14)   |
| C13  | N3   | C12 | C11  | 73.0(3)   | C37 | C38 | C39  | C40 | 1.0(4)     |
| C13  | N4   | C14 | C0AA | -179.5(3) | C37 | C38 | C39  | C42 | -179.6(3)  |
| C13  | N4   | C14 | C15  | -0.9(4)   | C38 | C37 | C41  | F7  | 153.1(4)   |
| C14  | N4   | C13 | O2   | -2.2(4)   | C38 | C37 | C41  | F8  | -87.5(4)   |
| C14  | N4   | C13 | N3   | 178.3(2)  | C38 | C37 | C41  | F9  | 32.9(6)    |
| C14  | C0AA | C18 | C17  | -0.4(4)   | C38 | C37 | C41  | F7A | 67.7(11)   |
| C14  | C0AA | C18 | C20  | 178.2(2)  | C38 | C37 | C41  | F9A | -41.4(16)  |
| C14  | C15  | C16 | C17  | -0.7(4)   | C38 | C37 | C41  | F8A | 173.9(13)  |
| C14  | C15  | C16 | C19  | -179.3(3) | C38 | C39 | C40  | C35 | -0.8(4)    |
| C15  | C16  | C17 | C18  | 1.0(4)    | C38 | C39 | C42  | F10 | 10.4(4)    |

## Torsion Angles for 2189987 (compound 2a)

| A   | B    | C   | D    | Angle/°    | A    | B    | C    | D    | Angle/°    |
|-----|------|-----|------|------------|------|------|------|------|------------|
| C15 | C16  | C19 | F1   | 70.9(6)    | C38  | C39  | C42  | F11  | 129.8(3)   |
| C15 | C16  | C19 | F2   | -47.8(5)   | C38  | C39  | C42  | F12  | -109.0(3)  |
| C15 | C16  | C19 | F3   | -158.8(5)  | C40  | C35  | C36  | C37  | 0.1(4)     |
| C15 | C16  | C19 | F3A  | 167.9(6)   | C40  | C39  | C42  | F10  | -170.2(2)  |
| C15 | C16  | C19 | F1A  | 53.6(7)    | C40  | C39  | C42  | F11  | -50.8(4)   |
| C15 | C16  | C19 | F2A  | -66.6(6)   | C40  | C39  | C42  | F12  | 70.5(3)    |
| C16 | C17  | C18 | C0AA | -0.4(4)    | C41  | C37  | C38  | C39  | 175.9(3)   |
| C16 | C17  | C18 | C20  | -179.0(2)  | C42  | C39  | C40  | C35  | 179.8(3)   |
| C17 | C16  | C19 | F1   | -107.7(6)  | N5A  | C24A | N6A  | C25A | -5(2)      |
| C17 | C16  | C19 | F2   | 133.6(5)   | N5A  | C24A | N6A  | C32A | 178.1(14)  |
| C17 | C16  | C19 | F3   | 22.6(6)    | C22A | N5A  | C24A | O3A  | 2(3)       |
| C17 | C16  | C19 | F3A  | -10.7(6)   | C22A | N5A  | C24A | N6A  | 172.8(13)  |
| C17 | C16  | C19 | F1A  | -125.0(6)  | C34A | N8   | C35  | C36  | -169.9(7)  |
| C17 | C16  | C19 | F2A  | 114.8(6)   | C34A | N8   | C35  | C40  | 9.1(8)     |
| C17 | C18  | C20 | F4   | -28.8(4)   | C34A | N7A  | C33A | C25A | 78.9(16)   |
| C17 | C18  | C20 | F5   | -149.3(3)  | O4A  | C34A | N7A  | C33A | -1(2)      |
| C17 | C18  | C20 | F6   | 90.2(4)    | C24A | N5A  | C22A | C21A | 77.9(18)   |
| C17 | C18  | C20 | F4A  | -100.2(10) | C24A | N5A  | C22A | C23A | -160.4(15) |
| C17 | C18  | C20 | F5A  | 145.6(9)   | C24A | N6A  | C25A | C33A | 84.9(19)   |
| C17 | C18  | C20 | F6A  | 23.2(10)   | C24A | N6A  | C32A | C26A | -88.2(18)  |
| C18 | C0AA | C14 | N4   | 179.3(2)   | O3A  | C24A | N6A  | C25A | 166.4(14)  |
| C18 | C0AA | C14 | C15  | 0.6(4)     | O3A  | C24A | N6A  | C32A | -11(2)     |
| C19 | C16  | C17 | C18  | 179.5(3)   | N6A  | C25A | C33A | N7A  | -161.9(11) |
| N6  | C25  | C26 | C27  | 136.9(4)   | N6A  | C32A | C26A | C31A | -138.4(12) |
| N6  | C25  | C26 | C31  | -44.3(5)   | N6A  | C32A | C26A | C27A | 45.8(17)   |
| N6  | C32  | C33 | N7   | 160.7(3)   | C25A | N6A  | C32A | C26A | 94.8(18)   |
| N8  | C35  | C36 | C37  | 179.1(3)   | C32A | N6A  | C25A | C33A | -98.3(16)  |
| N8  | C35  | C40 | C39  | -178.9(2)  | C32A | C26A | C31A | C30A | -175.7(14) |
| N8  | C34A | N7A | C33A | 176.5(10)  | C32A | C26A | C27A | C28A | 175.9(13)  |
| C22 | N5   | C24 | O3   | -3.7(5)    | C26A | C31A | C30A | C29A | 0.0        |
| C22 | N5   | C24 | N6   | 176.2(3)   | C31A | C26A | C27A | C28A | 0.0        |
| C24 | N5   | C22 | C21  | 163.3(4)   | C31A | C30A | C29A | C28A | 0.0        |
| C24 | N5   | C22 | C23  | -75.4(4)   | C30A | C29A | C28A | C27A | 0.0        |
| C24 | N6   | C25 | C26  | 93.5(4)    | C29A | C28A | C27A | C26A | 0.0        |
| C24 | N6   | C32 | C33  | -81.1(4)   | C27A | C26A | C31A | C30A | 0.0        |

## Hydrogen Bonds for 2189988 (compound 2b)

| D   | H   | A  | d(D-H)/Å | d(H-A)/Å | d(D-A)/Å | D-H-A/°   |
|-----|-----|----|----------|----------|----------|-----------|
| C50 | H50 | O5 | 0.9500   | 2.150(3) | 2.780(3) | 122.57(7) |
| N5  | H5a | O6 | 0.84(3)  | 2.08(3)  | 2.900(3) | 165(3)    |



Torsion Angles for 2189988 (compound **2b**)

| A   | B   | C   | D   | Angle/°     | A    | B    | C    | D    | Angle/°     |
|-----|-----|-----|-----|-------------|------|------|------|------|-------------|
| F1  | C7  | C2  | C1  | 134.7(2)    | N7   | C39  | C40  | C45  | -22.2(2)    |
| F1  | C7  | C2  | C3  | -47.4(3)    | C01A | C24  | C25  | C26  | 1.0(3)      |
| F2  | C7  | C2  | C1  | 13.9(3)     | C01A | C24  | C25  | C29  | -176.2(2)   |
| F2  | C7  | C2  | C3  | -168.3(2)   | C01A | C28  | C27  | C26  | 0.5(3)      |
| F3  | C7  | C2  | C1  | -106.6(2)   | C01A | C28  | C27  | C30  | 178.1(2)    |
| F3  | C7  | C2  | C3  | 71.2(3)     | C24  | C25  | C26  | C27  | -1.2(3)     |
| F4  | C8  | C4  | C3  | 32.6(3)     | C25  | C26  | C27  | C28  | 0.4(3)      |
| F4  | C8  | C4  | C5  | -152.1(2)   | C25  | C26  | C27  | C30  | -177.1(2)   |
| F5  | C8  | C4  | C3  | -86.7(2)    | C39  | C40  | C41  | C42  | -179.55(19) |
| F5  | C8  | C4  | C5  | 88.6(2)     | C39  | C40  | C45  | C44  | 179.4(2)    |
| F6  | C8  | C4  | C3  | 154.7(2)    | C40  | C41  | C42  | C43  | 0.0(3)      |
| F6  | C8  | C4  | C5  | -29.9(3)    | C40  | C45  | C44  | C43  | 0.2(2)      |
| O1  | C9  | N1  | C6  | 7.1(3)      | C41  | C42  | C43  | C44  | -1.1(3)     |
| O1  | C9  | N2  | C10 | -5.0(3)     | C42  | C43  | C44  | C45  | 0.9(3)      |
| O2  | C12 | N3  | C11 | 161.1(2)    | F13  | C51  | C47  | C46  | 87.8(2)     |
| O2  | C12 | N3  | C17 | -4.2(3)     | F13  | C51  | C47  | C48  | -89.6(2)    |
| O2  | C12 | N4  | C13 | -15.5(3)    | F14  | C51  | C47  | C46  | -32.4(3)    |
| N1  | C6  | C1  | C2  | -179.9(2)   | F14  | C51  | C47  | C48  | 150.2(2)    |
| N1  | C6  | C5  | C4  | 178.8(2)    | F15  | C51  | C47  | C46  | -152.0(2)   |
| N1  | C9  | N2  | C10 | 174.8(2)    | F15  | C51  | C47  | C48  | 30.6(3)     |
| N2  | C10 | C11 | N3  | -161.20(18) | F16  | C52  | C49  | C48  | 25.8(3)     |
| N3  | C12 | N4  | C13 | 165.1(2)    | F16  | C52  | C49  | C50  | -155.5(2)   |
| N3  | C17 | C18 | C19 | -22.8(2)    | F17  | C52  | C49  | C48  | -94.7(2)    |
| N3  | C17 | C18 | C23 | 157.58(19)  | F17  | C52  | C49  | C50  | 84.1(2)     |
| C1  | C2  | C3  | C4  | -0.9(3)     | F18  | C52  | C49  | C48  | 145.4(2)    |
| C1  | C6  | C5  | C4  | -1.6(3)     | F18  | C52  | C49  | C50  | -35.9(3)    |
| C2  | C3  | C4  | C5  | -0.2(3)     | O5   | C53  | N9   | C019 | 7.5(4)      |
| C2  | C3  | C4  | C8  | 174.9(2)    | O5   | C53  | N10  | C54  | -0.0(4)     |
| C3  | C4  | C5  | C6  | 1.5(3)      | O5   | C53  | N10A | C54A | 7.0(6)      |
| C17 | C18 | C19 | C20 | -178.6(3)   | O6   | C56  | N11  | C55  | -150.4(3)   |
| C17 | C18 | C23 | C22 | -179.9(2)   | O6   | C56  | N11  | C61  | 5.9(3)      |
| C18 | C19 | C20 | C21 | -1.2(3)     | O6   | C56  | N11  | C55A | 161.3(6)    |
| C18 | C23 | C22 | C21 | -1.7(3)     | O6   | C56  | N12  | C57  | 16.2(3)     |
| C19 | C20 | C21 | C22 | -0.1(4)     | N9   | C019 | C46  | C47  | -179.4(2)   |
| C20 | C21 | C22 | C23 | 1.5(4)      | N9   | C019 | C50  | C49  | 178.5(2)    |
| F7  | C29 | C25 | C24 | 96.5(2)     | N9   | C53  | N10  | C54  | -174.5(3)   |
| F7  | C29 | C25 | C26 | -80.8(2)    | N9   | C53  | N10A | C54A | 158.4(7)    |
| F8  | C29 | C25 | C24 | -22.2(2)    | N10  | C53  | N10A | C54A | -103.8(8)   |
| F8  | C29 | C25 | C26 | 160.5(2)    | N10  | C54  | C55  | N11  | 159.0(2)    |
| F9  | C29 | C25 | C24 | -142.9(2)   | N11  | C56  | N12  | C57  | -163.8(2)   |
| F9  | C29 | C25 | C26 | 39.8(3)     | N11  | C61  | C62  | C63  | 23.9(3)     |
| F10 | C30 | C27 | C26 | 98.4(2)     | N11  | C61  | C62  | C67  | -156.7(2)   |
| F10 | C30 | C27 | C28 | -79.2(2)    | N11  | C55A | C54A | N10A | -164.1(7)   |

Torsion Angles for 2189988 (compound **2b**)

| A   | B    | C   | D    | Angle/°     | A    | B    | C    | D    | Angle/°   |
|-----|------|-----|------|-------------|------|------|------|------|-----------|
| F11 | C30  | C27 | C26  | -20.0(3)    | C019 | C46  | C47  | C48  | 1.0(3)    |
| F11 | C30  | C27 | C28  | 162.4(2)    | C019 | C46  | C47  | C51  | -176.4(2) |
| F12 | C30  | C27 | C26  | -141.3(2)   | C019 | C50  | C49  | C48  | 0.8(3)    |
| F12 | C30  | C27 | C28  | 41.1(3)     | C019 | C50  | C49  | C52  | -177.9(2) |
| O3  | C31  | N5  | C01A | 4.0(3)      | C46  | C47  | C48  | C49  | -1.6(3)   |
| O3  | C31  | N6  | C32  | 1.8(3)      | C47  | C48  | C49  | C50  | 0.7(3)    |
| O4  | C34  | N7  | C33  | 175.8(2)    | C47  | C48  | C49  | C52  | 179.4(2)  |
| O4  | C34  | N7  | C39  | -6.5(3)     | C53  | N10A | C54A | C55A | 65.8(11)  |
| O4  | C34  | N8  | C35  | 1.2(3)      | C61  | C62  | C63  | C64  | 179.6(2)  |
| N5  | C01A | C24 | C25  | 178.5(2)    | C61  | C62  | C67  | C66  | -179.4(2) |
| N5  | C01A | C28 | C27  | -179.2(2)   | C62  | C63  | C64  | C65  | 0.0(3)    |
| N5  | C31  | N6  | C32  | -178.7(2)   | C62  | C67  | C66  | C65  | -0.5(3)   |
| N6  | C32  | C33 | N7   | 163.50(17)  | C63  | C64  | C65  | C66  | -0.5(3)   |
| N7  | C34  | N8  | C35  | -178.79(18) | C64  | C65  | C66  | C67  | 0.7(3)    |
| N7  | C39  | C40 | C41  | 158.45(18)  |      |      |      |      |           |

Hydrogen Bonds for 2189990 (compound **2c**)

| D  | H   | A               | d(D-H)/Å  | d(H-A)/Å  | d(D-A)/Å   | D-H-A/°   |
|----|-----|-----------------|-----------|-----------|------------|-----------|
| N2 | H2A | O2 <sup>1</sup> | 0.857(18) | 1.979(19) | 2.8202(16) | 166.7(16) |
| N4 | H4A | O1              | 0.854(19) | 2.108(19) | 2.9473(16) | 167.4(17) |

Torsion Angles for 2189990 (compound **2c**)

| A  | B  | C  | D  | Angle/°     | A   | B   | C   | D   | Angle/°     |
|----|----|----|----|-------------|-----|-----|-----|-----|-------------|
| C1 | C2 | C3 | C4 | -0.6(2)     | C13 | C14 | C15 | C16 | 0.4(2)      |
| C1 | C2 | C3 | C7 | -178.25(14) | C14 | C13 | C18 | C17 | 1.6(2)      |
| C2 | C1 | C6 | C5 | -0.6(2)     | C14 | C15 | C16 | C17 | 0.6(2)      |
| C2 | C1 | N1 | C9 | 24.3(2)     | C15 | C16 | C17 | C18 | -0.5(2)     |
| C2 | C3 | C4 | C5 | -0.2(2)     | C16 | C17 | C18 | C13 | -0.6(2)     |
| C2 | C3 | C7 | F4 | -141.50(15) | C18 | C13 | C14 | C15 | -1.5(2)     |
| C2 | C3 | C7 | F5 | 98.36(17)   | C20 | C21 | C22 | C23 | -1.1(2)     |
| C2 | C3 | C7 | F6 | -20.9(2)    | C21 | C20 | C25 | C24 | -0.3(2)     |
| C3 | C4 | C5 | C6 | 0.6(2)      | C21 | C20 | N4  | C19 | 139.45(15)  |
| C3 | C4 | C5 | C8 | -178.80(14) | C21 | C22 | C23 | C24 | -0.2(2)     |
| C4 | C3 | C7 | F4 | 40.8(2)     | C22 | C23 | C24 | C25 | 1.2(2)      |
| C4 | C3 | C7 | F5 | -79.35(19)  | C23 | C24 | C25 | C20 | -1.0(2)     |
| C4 | C3 | C7 | F6 | 161.39(14)  | C25 | C20 | C21 | C22 | 1.3(2)      |
| C4 | C5 | C6 | C1 | -0.2(2)     | C25 | C20 | N4  | C19 | -43.3(2)    |
| C4 | C5 | C8 | F1 | -154.42(14) | N1  | C1  | C2  | C3  | 179.50(14)  |
| C4 | C5 | C8 | F2 | 85.83(18)   | N1  | C1  | C6  | C5  | -179.17(13) |
| C4 | C5 | C8 | F3 | -34.4(2)    | N1  | C9  | N2  | C10 | 171.03(13)  |

Torsion Angles for 2189990 (compound **2c**)

| A   | B   | C   | D   | Angle/°     | A  | B   | C   | D   | Angle/°     |
|-----|-----|-----|-----|-------------|----|-----|-----|-----|-------------|
| C6  | C1  | C2  | C3  | 1.0(2)      | N2 | C9  | N1  | C1  | -179.61(14) |
| C6  | C1  | N1  | C9  | -157.12(14) | N2 | C10 | C11 | N3  | -159.61(12) |
| C6  | C5  | C8  | F1  | 26.2(2)     | N3 | C12 | C13 | C14 | 70.33(18)   |
| C6  | C5  | C8  | F2  | -93.53(18)  | N3 | C12 | C13 | C18 | -108.98(15) |
| C6  | C5  | C8  | F3  | 146.24(14)  | N3 | C19 | N4  | C20 | 177.71(13)  |
| C7  | C3  | C4  | C5  | 177.50(14)  | N4 | C19 | N3  | C11 | 1.9(2)      |
| C8  | C5  | C6  | C1  | 179.16(13)  | N4 | C19 | N3  | C12 | 172.41(12)  |
| C10 | C11 | N3  | C12 | -88.01(16)  | N4 | C20 | C21 | C22 | 178.67(14)  |
| C10 | C11 | N3  | C19 | 82.83(17)   | N4 | C20 | C25 | C24 | -177.52(14) |
| C11 | C10 | N2  | C9  | 79.14(17)   | O1 | C9  | N1  | C1  | 0.8(2)      |
| C12 | C13 | C14 | C15 | 179.19(14)  | O1 | C9  | N2  | C10 | -9.4(2)     |
| C12 | C13 | C18 | C17 | -179.07(14) | O2 | C19 | N3  | C11 | -179.67(13) |
| C13 | C12 | N3  | C11 | 70.05(17)   | O2 | C19 | N3  | C12 | -9.1(2)     |
| C13 | C12 | N3  | C19 | -101.08(15) | O2 | C19 | N4  | C20 | -0.8(2)     |

## Crystal structures of the nanorings

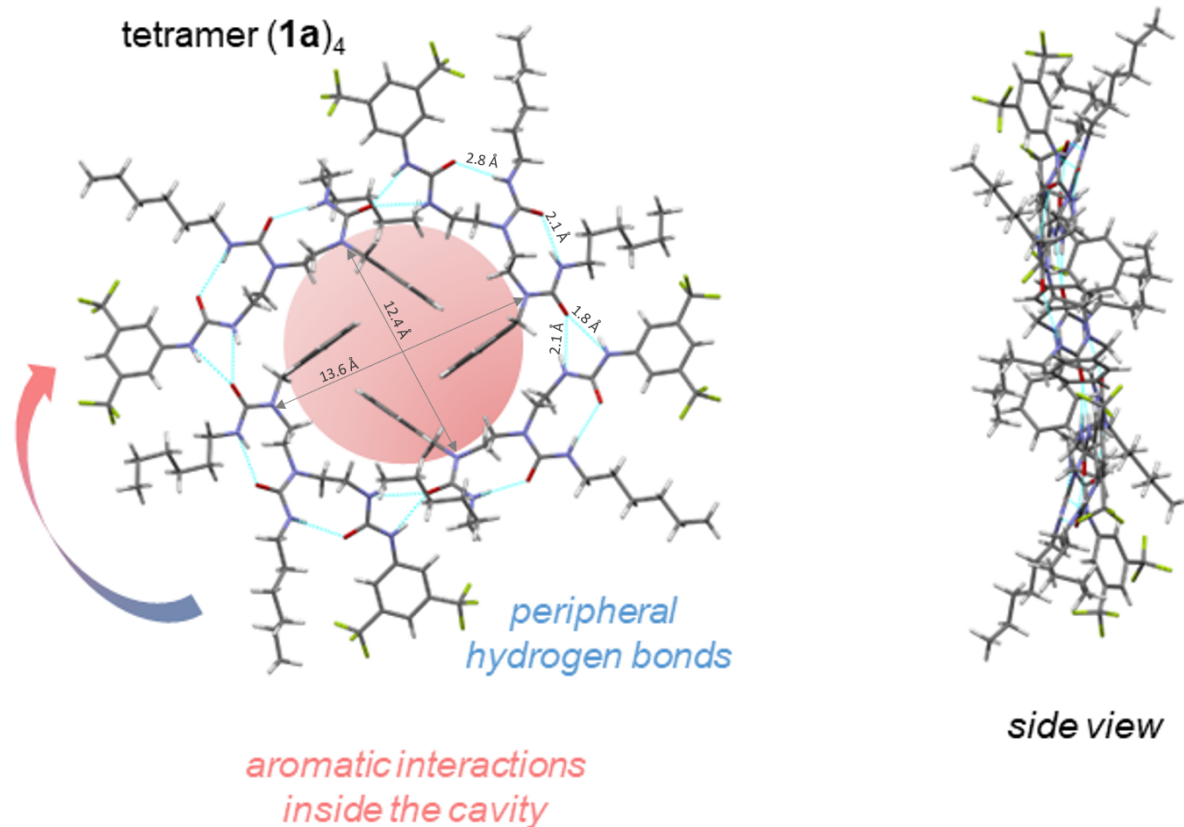

**Figure SI 1.** Nanorings formed by head-to-tail arrangement of **1a** in the crystal structure.

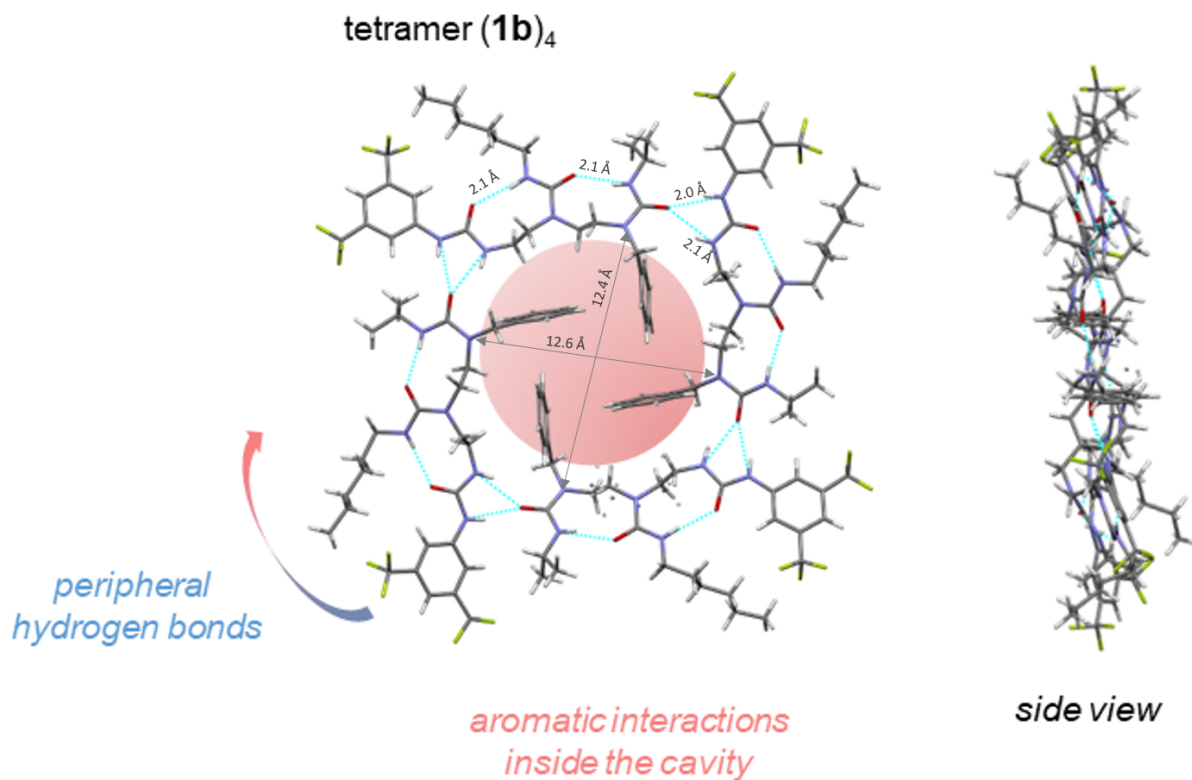

**Figure SI 2.** Nanorings formed by head-to-tail arrangement of **1b** in the crystal structure.

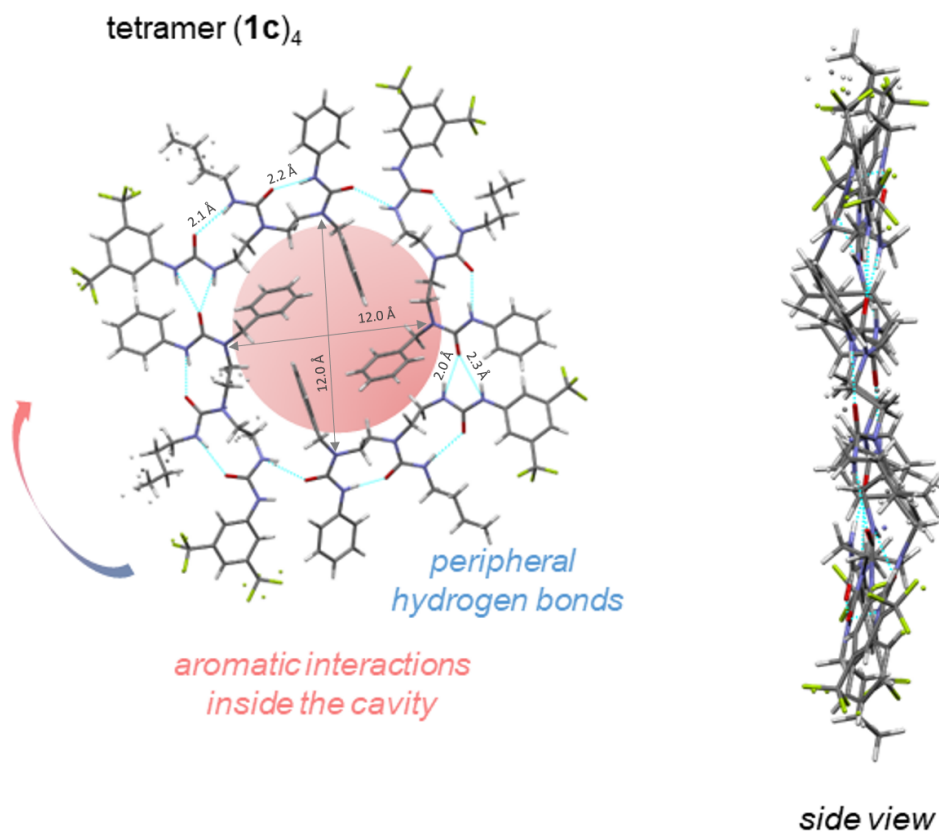

**Figure SI 3.** Nanorings formed by head-to-tail arrangement of **1c** in the crystal structure.

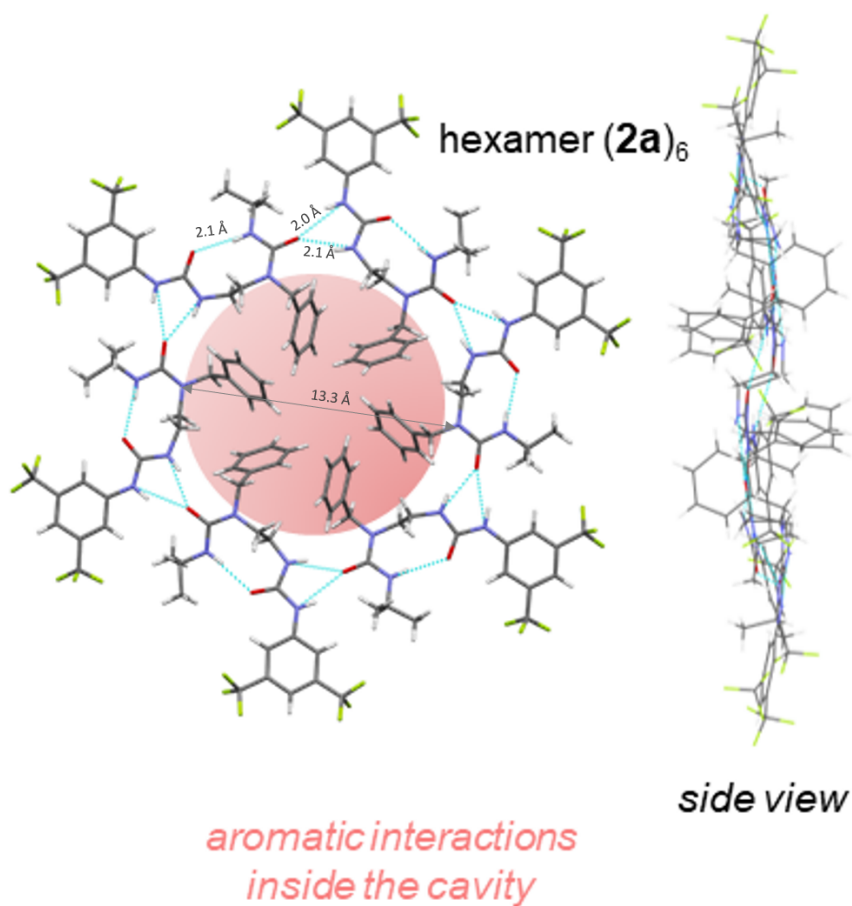

Figure SI 4. Nanorings formed by head-to-tail arrangement of **2a** in the crystal structure.

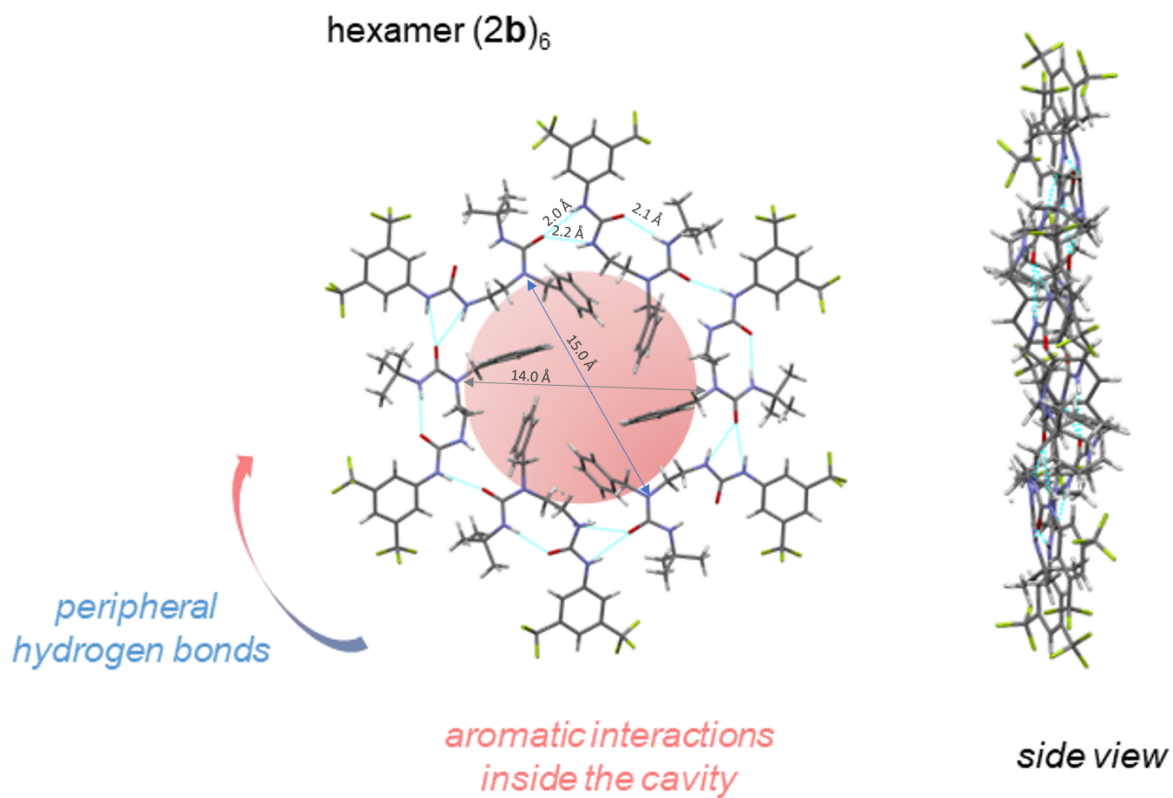

Figure SI 5. Nanorings formed by head-to-tail arrangement of **2b** in the crystal structure.

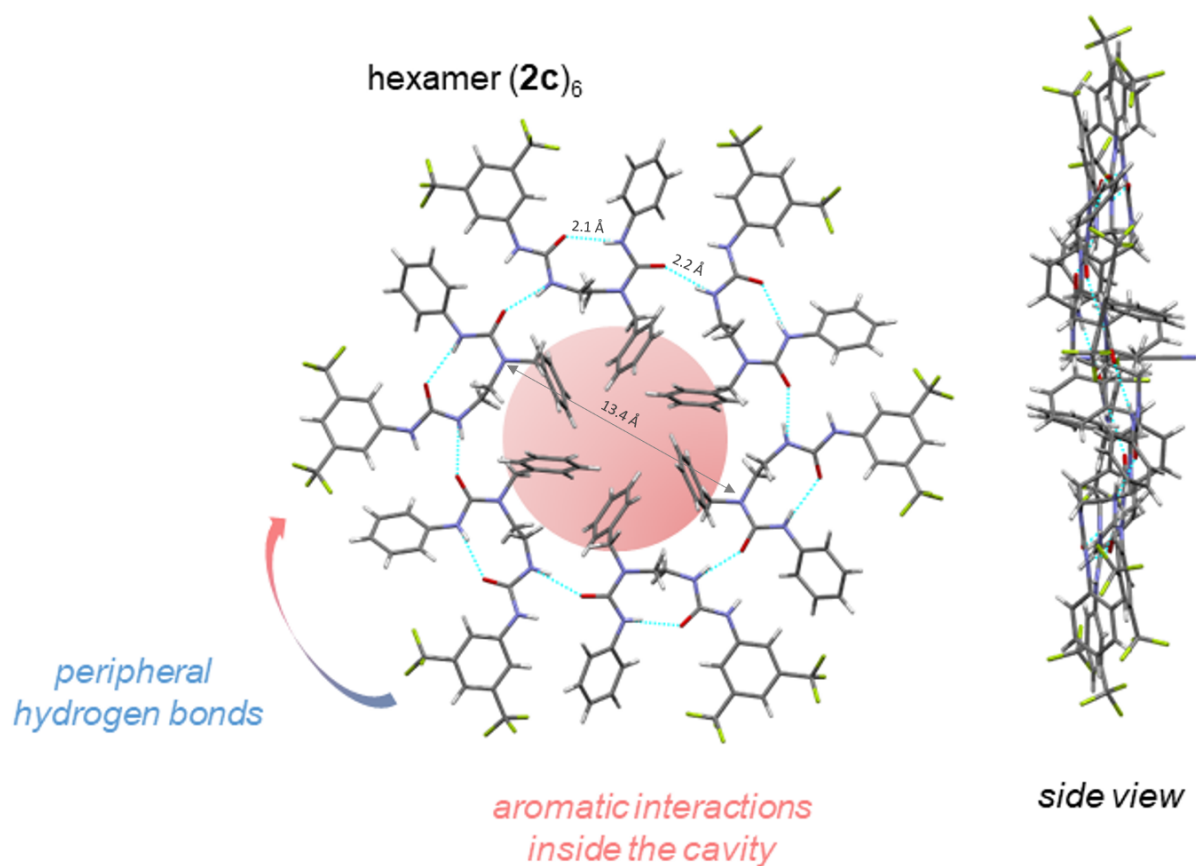

**Figure SI 6.** Nanorings formed by head-to-tail arrangement of **2c** in the crystal structure.

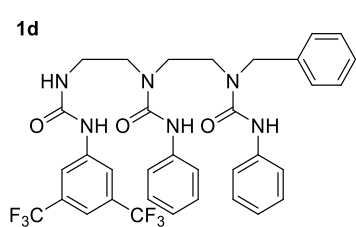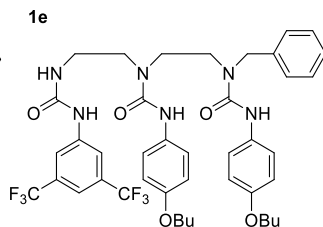

Identification code (CCDC)

**1d** (g48) (**2189991**)

**1e** (m\_d70\_c1\_col1\_\_twin1\_hklf4  
**2189996**)

Empirical formula

C<sub>34</sub>H<sub>32</sub>F<sub>6</sub>N<sub>6</sub>O<sub>3</sub>

C<sub>42</sub>H<sub>47.5</sub>F<sub>6</sub>N<sub>6</sub>O<sub>5</sub>

Formula weight

686.65

830.36

Temperature/K

100(2)

100(2)

Crystal system

monoclinic

triclinic

Space group

*C2/c*

*P*-1

*a*/Å

18.9800(6)

9.9573(5)

*b*/Å

20.3627(6)

19.5693(11)

*c*/Å

16.4981(5)

20.9138(11)

$\alpha$ /°

90

84.902(4)

$\beta$ /°

92.891(3)

89.962(4)

$\gamma$ /°

90

87.554(4)

Volume/Å<sup>3</sup>

6368.2(3)

4055.4(4)

Z

8

4

|                                                |                                                               |                                                              |
|------------------------------------------------|---------------------------------------------------------------|--------------------------------------------------------------|
| $\rho_{\text{calc}}/\text{cm}^3$               | 1.432                                                         | 1.360                                                        |
| $\mu/\text{mm}^{-1}$                           | 0.117                                                         | 0.100                                                        |
| F(000)                                         | 2848.0                                                        | 1742.0                                                       |
| Crystal size/ $\text{mm}^3$                    | $0.3 \times 0.26 \times 0.25$                                 | $0.04 \times 0.04 \times 0.02$                               |
| Radiation                                      | Mo K $\alpha$ ( $\lambda = 0.71073$ )                         | Synchrotron ( $\lambda = 0.6889$ )                           |
| 2 $\theta$ range for data collection/ $^\circ$ | 6.714 to 58.568                                               | 3.79 to 49.22                                                |
| Index ranges                                   | $-24 \leq h \leq 24, -26 \leq k \leq 27, -22 \leq l \leq 22$  | $-11 \leq h \leq 11, -23 \leq k \leq 23, -25 \leq l \leq 25$ |
| Reflections collected                          | 25400                                                         | 40914                                                        |
| Independent reflections                        | 7599 [ $R_{\text{int}} = 0.0424, R_{\text{sigma}} = 0.0487$ ] | 40914 [ $R_{\text{int}} = ?, R_{\text{sigma}} = 0.0395$ ]    |
| Data/restraints/parameters                     | 7599/203/508                                                  | 40914/0/1070                                                 |
| Goodness-of-fit on $F^2$                       | 1.045                                                         | 1.508                                                        |
| Final R indexes [ $I \geq 2\sigma(I)$ ]        | $R_1 = 0.0520, wR_2 = 0.1086$                                 | $R_1 = 0.1231, wR_2 = 0.3821$                                |
| Final R indexes [all data]                     | $R_1 = 0.0762, wR_2 = 0.1217$                                 | $R_1 = 0.1602, wR_2 = 0.4043$                                |
| Largest diff. peak/hole / $e \text{ \AA}^{-3}$ | 0.36/-0.33                                                    | 0.92/-0.64                                                   |

#### Hydrogen Bonds for 2189991 (compound **1d**)

| D   | H   | A                | d(D-H)/ $\text{\AA}$ | d(H-A)/ $\text{\AA}$ | d(D-A)/ $\text{\AA}$ | D-H-A/ $^\circ$ |
|-----|-----|------------------|----------------------|----------------------|----------------------|-----------------|
| C2  | H2  | O23              | 0.9500               | 2.207(2)             | 2.814(2)             | 120.74(6)       |
| N9  | H9  | O17 <sup>1</sup> | 0.8800               | 2.028(2)             | 2.807(2)             | 147.03(7)       |
| N9A | H9A | O17 <sup>1</sup> | 0.8800               | 1.961(15)            | 2.766(15)            | 151.3(5)        |

#### Torsion Angles for 2189991 (compound **1d**)

| A   | B   | C    | D    | Angle/ $^\circ$ | A   | B    | C    | D    | Angle/ $^\circ$ |
|-----|-----|------|------|-----------------|-----|------|------|------|-----------------|
| F25 | C24 | C5   | C4   | 45.70(19)       | C13 | N12A | C11A | C10A | -73.1(15)       |
| F25 | C24 | C5   | C6   | -136.72(15)     | C2  | C3   | C4   | C5   | 0.4(2)          |
| F26 | C24 | C5   | C4   | -72.64(18)      | C2  | C3   | C28  | F30  | 170.3(7)        |
| F26 | C24 | C5   | C6   | 104.94(16)      | C2  | C3   | C28  | F31  | 55.2(4)         |
| O17 | C16 | N18  | C38  | -2.3(2)         | C2  | C3   | C28  | F31A | 81.4(14)        |
| O17 | C16 | N15  | C14  | 173.91(16)      | C2  | C3   | C28  | F29A | -49.3(8)        |
| O17 | C16 | N15  | C19  | 5.7(2)          | C2  | C3   | C28  | F30A | -153.3(11)      |
| N18 | C16 | N15  | C14  | -6.6(2)         | C2  | C1   | N7   | C8   | -12.4(2)        |
| N18 | C16 | N15  | C19  | -174.82(15)     | C2  | C1   | C6   | C5   | 0.9(2)          |
| N18 | C38 | C43  | C42  | 178.86(15)      | C43 | C38  | C39  | C40  | 0.4(2)          |
| N18 | C38 | C39  | C40  | -179.94(18)     | C43 | C42  | C41  | C40  | -0.1(2)         |
| O21 | C20 | N22  | C44  | 12.3(2)         | N15 | C19  | C32  | C37  | -58.67(19)      |
| O21 | C20 | N12  | C13  | 14.6(2)         | N15 | C19  | C32  | C33  | 117.90(19)      |
| O21 | C20 | N12  | C11  | -173.74(18)     | C3  | C4   | C5   | C6   | -0.1(2)         |
| O21 | C20 | N12A | C13  | -45.8(3)        | C3  | C4   | C5   | C24  | 177.43(16)      |
| O21 | C20 | N12A | C11A | 163.2(11)       | C1  | N7   | C8   | N9   | 172.1(2)        |
| O23 | C8  | N7   | C1   | -6.0(3)         | C1  | N7   | C8   | N9A  | -151.5(9)       |

## Torsion Angles for 2189991 (compound 1d)

| A   | B    | C    | D    | Angle/°     | A    | B    | C    | D    | Angle/°     |
|-----|------|------|------|-------------|------|------|------|------|-------------|
| O23 | C8   | N9   | C10  | -0.5(2)     | C1   | C6   | C5   | C4   | -0.5(2)     |
| O23 | C8   | N9A  | C10A | 18.5(9)     | C1   | C6   | C5   | C24  | -178.06(16) |
| N22 | C44  | C45  | C46  | -178.95(16) | N7   | C8   | N9   | C10  | -178.70(16) |
| N22 | C44  | C49  | C48  | 178.04(17)  | N7   | C8   | N9A  | C10A | 166.4(11)   |
| N22 | C20  | N12  | C13  | -167.67(17) | N12  | C20  | N12A | C11A | -89.9(14)   |
| N22 | C20  | N12  | C11  | 4.0(2)      | N12  | C11  | C10  | N9   | 159.25(17)  |
| N22 | C20  | N12A | C13  | 161.6(7)    | C19  | C32  | C37  | C36  | 176.93(19)  |
| N22 | C20  | N12A | C11A | 10.6(8)     | C19  | C32  | C33  | C34  | -176.2(2)   |
| C14 | C13  | N12  | C20  | -84.37(18)  | C38  | C39  | C40  | C41  | 0.8(2)      |
| C14 | C13  | N12  | C11  | 103.34(17)  | C44  | C45  | C46  | C47  | 0.6(2)      |
| C14 | C13  | N12A | C20  | -30.3(3)    | C44  | C49  | C48  | C47  | 1.1(2)      |
| C14 | C13  | N12A | C11A | 122.5(12)   | C20  | N12A | C11A | C10A | 76.2(17)    |
| C14 | N15  | C19  | C32  | -67.96(16)  | C39  | C40  | C41  | C42  | -1.0(2)     |
| F27 | C24  | C5   | C4   | 166.98(16)  | C32  | C37  | C36  | C35  | -0.3(3)     |
| F27 | C24  | C5   | C6   | -15.4(2)    | C32  | C33  | C34  | C35  | -1.1(3)     |
| F29 | C28  | C3   | C2   | -59.7(4)    | C48  | C47  | C46  | C45  | -0.9(2)     |
| F29 | C28  | C3   | C4   | 119.6(4)    | C37  | C36  | C35  | C34  | -0.3(3)     |
| C13 | N12  | C20  | N12A | -74.7(12)   | N9   | C8   | N9A  | C10A | -89.9(14)   |
| C13 | N12  | C11  | C10  | 83.4(2)     | C8   | N9A  | C10A | C11A | 50.9(18)    |
| C13 | N12A | C20  | N12  | 61.1(11)    | N12A | C11A | C10A | N9A  | -161.6(14)  |

## Hydrogen Bonds for 2189996 (compound 1e)

| D   | H   | A               | d(D-H)/Å | d(H-A)/Å | d(D-A)/Å | D-H-A/°    |
|-----|-----|-----------------|----------|----------|----------|------------|
| N6  | H6  | O9              | 0.8800   | 1.985(5) | 2.826(5) | 159.33(13) |
| N12 | H12 | O4 <sup>1</sup> | 0.8800   | 1.958(5) | 2.803(5) | 160.63(13) |

## Torsion Angles for 2189996 (compound 1e)

| A  | B   | C   | D   | Angle/°   | A   | B   | C   | D   | Angle/°   |
|----|-----|-----|-----|-----------|-----|-----|-----|-----|-----------|
| F1 | C1  | C2  | C3  | -59.0(5)  | C13 | C14 | C15 | C16 | -55.2(7)  |
| F1 | C1  | C2  | C42 | 123.0(4)  | F7  | C43 | C44 | C45 | 58.1(5)   |
| F4 | C41 | C40 | C42 | 22.2(6)   | F7  | C43 | C44 | C84 | -124.3(4) |
| F4 | C41 | C40 | C39 | -159.3(4) | F8  | C43 | C44 | C45 | -60.5(5)  |
| F2 | C1  | C2  | C3  | 179.8(4)  | F8  | C43 | C44 | C84 | 117.1(4)  |
| F2 | C1  | C2  | C42 | 1.8(5)    | F9  | C43 | C44 | C45 | -179.5(4) |
| F3 | C1  | C2  | C3  | 60.0(5)   | F9  | C43 | C44 | C84 | -1.9(5)   |
| F3 | C1  | C2  | C42 | -118.0(4) | F10 | C83 | C82 | C81 | -75.0(6)  |
| F5 | C41 | C40 | C42 | 142.9(4)  | F10 | C83 | C82 | C84 | 105.0(5)  |
| F5 | C41 | C40 | C39 | -38.7(5)  | F11 | C83 | C82 | C81 | 162.1(5)  |
| F6 | C41 | C40 | C42 | -97.9(4)  | F11 | C83 | C82 | C84 | -17.9(7)  |
| F6 | C41 | C40 | C39 | 80.5(5)   | F12 | C83 | C82 | C81 | 40.3(6)   |



## Torsion Angles for 2189996 (compound 1e)

| A   | B   | C   | D   | Angle/°   | A   | B   | C   | D   | Angle/°   |
|-----|-----|-----|-----|-----------|-----|-----|-----|-----|-----------|
| O1  | C5  | N1  | C4  | 3.9(6)    | F12 | C83 | C82 | C84 | -139.7(5) |
| O1  | C5  | N2  | C6  | 6.7(5)    | O6  | C47 | N8  | C48 | -5.4(5)   |
| O2  | C8  | N4  | C9  | -7.9(5)   | O6  | C47 | N7  | C46 | -3.5(6)   |
| O2  | C8  | N3  | C19 | -4.8(5)   | O9  | C63 | N11 | C62 | 6.2(5)    |
| O2  | C8  | N3  | C7  | -175.3(4) | O9  | C63 | N11 | C74 | 171.5(4)  |
| O4  | C21 | N5  | C20 | -7.0(4)   | O9  | C63 | N12 | C64 | 7.3(5)    |
| O4  | C21 | N5  | C32 | -169.3(4) | O7  | C50 | N9  | C61 | 5.6(5)    |
| O4  | C21 | N6  | C22 | -7.4(5)   | O7  | C50 | N9  | C49 | 173.7(4)  |
| O5  | C25 | C30 | C31 | -175.8(5) | O7  | C50 | N10 | C51 | 4.8(5)    |
| O5  | C25 | C24 | C23 | 176.7(4)  | O10 | C67 | C72 | C73 | 178.3(4)  |
| O5  | C26 | C27 | C28 | 175.3(6)  | O10 | C67 | C66 | C65 | -179.1(4) |
| O3  | C12 | C11 | C10 | -179.2(5) | O10 | C68 | C69 | C70 | -172.8(4) |
| O3  | C12 | C17 | C18 | 179.2(5)  | O8  | C54 | C53 | C52 | 174.7(5)  |
| O3  | C13 | C14 | C15 | -52.0(6)  | O8  | C54 | C59 | C60 | -174.7(5) |
| N1  | C5  | N2  | C6  | -173.2(3) | O8  | C55 | C56 | C57 | -174.0(5) |
| N1  | C4  | C3  | C2  | 179.0(4)  | N11 | C63 | N12 | C64 | -171.4(3) |
| N1  | C4  | C39 | C40 | -178.9(4) | N11 | C62 | C61 | N9  | 179.2(3)  |
| N4  | C8  | N3  | C19 | 176.1(4)  | N11 | C74 | C75 | C76 | -157.5(4) |
| N4  | C8  | N3  | C7  | 5.6(5)    | N11 | C74 | C75 | C80 | 21.9(5)   |
| N4  | C9  | C10 | C11 | -179.8(4) | N9  | C50 | N10 | C51 | -172.4(4) |
| N4  | C9  | C18 | C17 | 179.7(5)  | N9  | C49 | C48 | N8  | 56.7(4)   |
| N3  | C19 | C20 | N5  | -175.0(3) | N8  | C47 | N7  | C46 | 179.0(4)  |
| N3  | C7  | C6  | N2  | -56.7(4)  | N12 | C64 | C65 | C66 | 180.0(4)  |
| N5  | C21 | N6  | C22 | 170.0(3)  | N12 | C64 | C73 | C72 | 179.3(4)  |
| N5  | C32 | C33 | C34 | 159.5(4)  | N7  | C46 | C81 | C82 | 179.8(4)  |
| N5  | C32 | C33 | C38 | -22.7(4)  | N7  | C46 | C45 | C44 | 179.6(4)  |
| N6  | C22 | C23 | C24 | -176.9(4) | N10 | C51 | C52 | C53 | -177.9(4) |
| N6  | C22 | C31 | C30 | 177.7(4)  | N10 | C51 | C60 | C59 | 178.0(5)  |
| C9  | C10 | C11 | C12 | 0.8(6)    | C64 | C65 | C66 | C67 | 0.5(5)    |
| C9  | C18 | C17 | C12 | -0.7(6)   | C64 | C73 | C72 | C67 | 1.3(5)    |
| C22 | C23 | C24 | C25 | -1.2(5)   | C51 | C52 | C53 | C54 | 1.2(5)    |
| C22 | C31 | C30 | C25 | -0.5(6)   | C51 | C60 | C59 | C54 | -1.3(6)   |
| C1  | C2  | C3  | C4  | -177.8(4) | C46 | C81 | C82 | C84 | 0.0(6)    |
| C1  | C2  | C42 | C40 | 177.3(4)  | C46 | C81 | C82 | C83 | -179.9(5) |
| C23 | C24 | C25 | C30 | -1.8(5)   | C46 | C45 | C44 | C43 | 178.8(4)  |
| C31 | C30 | C25 | C24 | 2.6(5)    | C46 | C45 | C44 | C84 | 1.3(5)    |
| C10 | C11 | C12 | C17 | 0.9(6)    | C81 | C82 | C84 | C44 | -0.3(6)   |
| C33 | C34 | C35 | C36 | -1.5(6)   | C79 | C80 | C75 | C74 | 178.7(4)  |
| C33 | C38 | C37 | C36 | 0.4(5)    | C79 | C80 | C75 | C76 | -1.9(5)   |
| C4  | C3  | C2  | C42 | 0.2(5)    | C79 | C78 | C77 | C76 | 0.2(6)    |
| C4  | C39 | C40 | C42 | -0.6(6)   | C74 | C75 | C76 | C77 | -179.1(4) |
| C4  | C39 | C40 | C41 | -179.0(5) | C45 | C44 | C84 | C82 | -0.4(6)   |
| C40 | C42 | C2  | C3  | -0.6(5)   | C43 | C44 | C84 | C82 | -177.9(5) |

Torsion Angles for 2189996 (compound 1e)

| A   | B   | C   | D   | Angle/°   | A   | B   | C   | D   | Angle/°  |
|-----|-----|-----|-----|-----------|-----|-----|-----|-----|----------|
| C34 | C35 | C36 | C37 | 1.4(6)    | C53 | C54 | C59 | C60 | 3.5(6)   |
| C11 | C12 | C17 | C18 | -1.0(6)   | C68 | C69 | C70 | C71 | -64.9(5) |
| C26 | C27 | C28 | C29 | -176.4(7) | C55 | C56 | C57 | C58 | 179.7(6) |

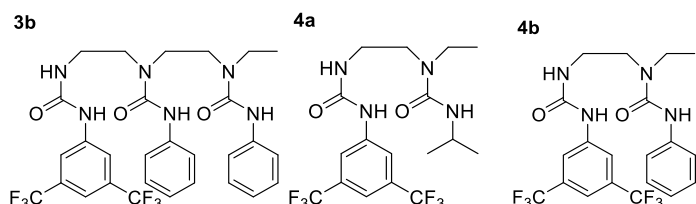

| Identification code (CCDC)             | <b>3b</b> (dte126)<br>(2189998)                                              | <b>4a</b><br>(s5784l_auto)<br>(2190003)                                      | <b>4b</b> (g32a)<br>(2190004)                                                |
|----------------------------------------|------------------------------------------------------------------------------|------------------------------------------------------------------------------|------------------------------------------------------------------------------|
| Empirical formula                      | C <sub>29</sub> H <sub>30</sub> F <sub>6</sub> N <sub>6</sub> O <sub>3</sub> | C <sub>17</sub> H <sub>22</sub> F <sub>6</sub> N <sub>4</sub> O <sub>2</sub> | C <sub>20</sub> H <sub>20</sub> F <sub>6</sub> N <sub>4</sub> O <sub>2</sub> |
| Formula weight                         | 624.59                                                                       | 428.38                                                                       | 462.40                                                                       |
| Temperature/K                          | 100(2)                                                                       | 200(2)                                                                       | 100(2)                                                                       |
| Crystal system                         | monoclinic                                                                   | monoclinic                                                                   | monoclinic                                                                   |
| Space group                            | <i>P</i> 2 <sub>1</sub> / <i>c</i>                                           | <i>P</i> 2 <sub>1</sub> / <i>n</i>                                           | <i>P</i> 2 <sub>1</sub> / <i>c</i>                                           |
| <i>a</i> /Å                            | 10.2730(3)                                                                   | 11.6426(4)                                                                   | 13.7401(12)                                                                  |
| <i>b</i> /Å                            | 19.1589(4)                                                                   | 11.0107(4)                                                                   | 14.0361(11)                                                                  |
| <i>c</i> /Å                            | 15.2648(4)                                                                   | 16.8030(5)                                                                   | 11.5499(10)                                                                  |
| $\alpha$ /°                            | 90                                                                           | 90                                                                           | 90                                                                           |
| $\beta$ /°                             | 101.0383(13)                                                                 | 108.437(3)                                                                   | 113.558(3)                                                                   |
| $\gamma$ /°                            | 90                                                                           | 90                                                                           | 90                                                                           |
| Volume/Å <sup>3</sup>                  | 2948.82(13)                                                                  | 2043.46(12)                                                                  | 2041.8(3)                                                                    |
| <i>Z</i>                               | 4                                                                            | 4                                                                            | 4                                                                            |
| $\rho_{\text{calc}}$ /cm <sup>3</sup>  | 1.407                                                                        | 1.392                                                                        | 1.504                                                                        |
| $\mu$ /mm <sup>-1</sup>                | 0.119                                                                        | 1.141                                                                        | 0.136                                                                        |
| <i>F</i> (000)                         | 1296.0                                                                       | 888.0                                                                        | 952.0                                                                        |
| Crystal size/mm <sup>3</sup>           | 0.42 × 0.382 × 0.207                                                         | 0.558 × 0.377 × 0.328                                                        | 0.553 × 0.426 × 0.19                                                         |
| Radiation                              | MoK $\alpha$ ( $\lambda$ = 0.71073)                                          | CuK $\alpha$ ( $\lambda$ = 1.54184)                                          | MoK $\alpha$ ( $\lambda$ = 0.71073)                                          |
| 2 $\theta$ range for data collection/° | 3.45 to 54.968                                                               | 8.17 to 136.498                                                              | 3.234 to 51.352                                                              |
| Index ranges                           | -13 ≤ <i>h</i> ≤ 13, -23 ≤ <i>k</i> ≤ 24, -19 ≤ <i>l</i> ≤ 19                | -14 ≤ <i>h</i> ≤ 13, -13 ≤ <i>k</i> ≤ 13, -20 ≤ <i>l</i> ≤ 17                | -16 ≤ <i>h</i> ≤ 16, -17 ≤ <i>k</i> ≤ 17, -13 ≤ <i>l</i> ≤ 14                |
| Reflections collected                  | 39105                                                                        | 12890                                                                        | 59432                                                                        |
| Independent reflections                | 6760 [R <sub>int</sub> = 0.0407, R <sub>sigma</sub> = 0.0280]                | 3712 [R <sub>int</sub> = 0.0279, R <sub>sigma</sub> = 0.0290]                | 3866 [R <sub>int</sub> = 0.1093, R <sub>sigma</sub> = 0.0507]                |
| Data/restraints/parameters             | 6760/356/534                                                                 | 3712/181/344                                                                 | 3866/169/323                                                                 |

|                                                |                                    |                                    |                                    |
|------------------------------------------------|------------------------------------|------------------------------------|------------------------------------|
| Goodness-of-fit on $F^2$                       | 1.012                              | 1.048                              | 1.037                              |
| Final R indexes [ $I \geq 2\sigma(I)$ ]        | $R_1 = 0.0438,$<br>$wR_2 = 0.1010$ | $R_1 = 0.0509,$<br>$wR_2 = 0.1300$ | $R_1 = 0.0423,$<br>$wR_2 = 0.0909$ |
| Final R indexes [all data]                     | $R_1 = 0.0645,$<br>$wR_2 = 0.1132$ | $R_1 = 0.0606,$<br>$wR_2 = 0.1367$ | $R_1 = 0.0727,$<br>$wR_2 = 0.1042$ |
| Largest diff. peak/hole / $e \text{ \AA}^{-3}$ | 0.35/-0.34                         | 0.34/-0.28                         | 13.7401(12)                        |

Hydrogen Bonds for 2189998 (compound **3b**)

| D   | H   | A               | $d(D-H)/\text{\AA}$ | $d(H-A)/\text{\AA}$ | $d(D-A)/\text{\AA}$ | D-H-A/ $^\circ$ |
|-----|-----|-----------------|---------------------|---------------------|---------------------|-----------------|
| C6  | H6  | O1              | 0.9500              | 2.2607(18)          | 2.8704(18)          | 121.21(5)       |
| C18 | H18 | O2A             | 0.9500              | 2.25(3)             | 2.86(3)             | 121.6(5)        |
| N1  | H1  | O3 <sup>1</sup> | 0.834(19)           | 2.111(19)           | 2.8823(17)          | 153.6(17)       |
| N2  | H2a | O3 <sup>1</sup> | 0.86(2)             | 1.94(2)             | 2.745(2)            | 156.3(19)       |

Torsion Angles for for 2189998 (compound **3b**)

| A    | B    | C    | D    | Angle/ $^\circ$ | A    | B    | C    | D    | Angle/ $^\circ$ |
|------|------|------|------|-----------------|------|------|------|------|-----------------|
| C1   | C2   | C3   | C4   | -0.82(19)       | C12  | N4   | C13  | C14  | 156.1(4)        |
| C1   | C2   | C3   | C7   | 178.30(16)      | C12  | N4   | C13  | C18  | -22.4(7)        |
| C1   | C6   | C5   | C4   | -0.17(18)       | C12  | N4   | C13  | N4A  | -102(8)         |
| C1   | C6   | C5   | C8   | 176.40(15)      | C12A | N3A  | C19A | C20A | -81.0(14)       |
| C1   | N1   | C9   | N2   | -172.47(19)     | C12A | N4A  | C13  | C14  | -179(4)         |
| C1   | N1   | C9   | N2A  | -140.6(7)       | C12A | N4A  | C13  | C18  | -6(7)           |
| C1   | N1   | C9   | O1   | 8.9(2)          | C12A | N4A  | C13  | N4   | 100(10)         |
| C2   | C3   | C4   | C5   | -0.50(19)       | C13  | C14  | C15  | C16  | 0.2(2)          |
| C2   | C3   | C7   | F1   | -3.0(2)         | C13  | C18  | C17  | C16  | 0.4(2)          |
| C2   | C3   | C7   | F1A  | 161.0(10)       | C14  | C15  | C16  | C17  | -0.4(2)         |
| C2   | C3   | C7   | F2   | -122.4(2)       | C15  | C16  | C17  | C18  | 0.2(2)          |
| C2   | C3   | C7   | F2A  | 45.2(10)        | C19  | C20  | N5   | C27  | 74.85(17)       |
| C2   | C3   | C7   | F3   | 119.9(2)        | C19  | C20  | N5   | C28  | -84.80(16)      |
| C2   | C3   | C7   | F3A  | -73.9(12)       | C19A | C20A | N5A  | C27  | -57.5(14)       |
| C3   | C4   | C5   | C6   | 1.00(19)        | C19A | C20A | N5A  | C28A | 107.4(13)       |
| C3   | C4   | C5   | C8   | -175.52(15)     | C20  | N5   | C27  | N5A  | -86.4(8)        |
| C4   | C5   | C8   | F4   | 94.80(16)       | C20  | N5   | C27  | N6   | 7.5(2)          |
| C4   | C5   | C8   | F5   | -23.81(16)      | C20  | N5   | C27  | O3   | -174.91(17)     |
| C4   | C5   | C8   | F6   | -146.32(16)     | C20  | N5   | C28  | C29  | -78.02(19)      |
| C9   | N2   | C10  | C11  | -74.1(2)        | C20A | N5A  | C27  | N5   | 83.2(14)        |
| C9   | N2A  | C10A | C11A | 50.7(13)        | C20A | N5A  | C27  | N6   | -18.6(15)       |
| C10  | C11  | N3   | C12  | -84.49(18)      | C20A | N5A  | C27  | O3   | -168.1(11)      |
| C10  | C11  | N3   | C19  | 92.91(16)       | C20A | N5A  | C28A | C29A | -75.0(16)       |
| C10A | C11A | N3A  | C12A | 78.0(15)        | C21  | C22  | C23  | C24  | -0.8(2)         |
| C10A | C11A | N3A  | C19A | -99.8(12)       | C21  | C26  | C25  | C24  | -0.11(19)       |
| C11  | N3   | C12  | N4   | 1.5(3)          | C21  | N6   | C27  | N5   | -176.86(17)     |
| C11  | N3   | C12  | O2   | -178.9(2)       | C21  | N6   | C27  | N5A  | -141.9(6)       |

Torsion Angles for for 2189998 (compound **3b**)

| A    | B   | C    | D    | Angle/°     | A   | B   | C    | D    | Angle/°  |
|------|-----|------|------|-------------|-----|-----|------|------|----------|
| C11  | N3  | C19  | C20  | -103.91(17) | C21 | N6  | C27  | O3   | 5.52(19) |
| C11A | N3A | C12A | N4A  | -4(3)       | C22 | C23 | C24  | C25  | -0.3(3)  |
| C11A | N3A | C12A | O2A  | -177(2)     | C23 | C24 | C25  | C26  | 0.8(2)   |
| C11A | N3A | C19A | C20A | 96.9(13)    | C27 | N5  | C28  | C29  | 121.9(2) |
| C12  | N3  | C19  | C20  | 73.66(18)   | C27 | N5A | C28A | C29A | 90.5(15) |

Hydrogen Bonds for 2190003 (compound **4a**)

| D  | H  | A               | d(D-H)/Å  | d(H-A)/Å  | d(D-A)/Å | D-H-A/° |
|----|----|-----------------|-----------|-----------|----------|---------|
| N1 | H1 | O2 <sup>1</sup> | 0.831(15) | 1.970(16) | 2.787(2) | 167(2)  |

Torsion Angles for 2190003 (compound **4a**)

| A   | B   | C   | D   | Angle/°     | A   | B  | C   | D   | Angle/°     |
|-----|-----|-----|-----|-------------|-----|----|-----|-----|-------------|
| N1  | C6  | C5  | C4  | -178.18(18) | C8  | C4 | C5  | C6  | -179.42(19) |
| N1  | C6  | C1  | C2  | 178.15(19)  | C11 | N3 | C12 | O2  | -178.44(16) |
| N3  | C11 | C10 | N2  | -162.01(15) | C11 | N3 | C12 | N4  | 1.9(3)      |
| C2  | C3  | C4  | C8  | 179.55(19)  | C11 | N3 | C16 | C17 | 79.9(2)     |
| C2  | C3  | C4  | C5  | 0.6(3)      | C7  | C2 | C3  | C4  | 178.8(2)    |
| C13 | N4  | C12 | O2  | 5.4(3)      | C7  | C2 | C1  | C6  | -179.1(2)   |
| C13 | N4  | C12 | N3  | -174.94(18) | C16 | N3 | C12 | O2  | -2.9(3)     |
| C9  | N1  | C6  | C5  | -170.8(2)   | C16 | N3 | C12 | N4  | 177.49(17)  |
| C9  | N1  | C6  | C1  | 10.9(3)     | C16 | N3 | C11 | C10 | -98.1(2)    |
| C9  | N2  | C10 | C11 | 75.5(2)     | C6  | N1 | C9  | O1  | 3.6(4)      |
| C3  | C2  | C7  | F2  | 128.5(5)    | C6  | N1 | C9  | N2  | -177.0(2)   |
| C3  | C2  | C7  | F1  | -111.6(5)   | C5  | C4 | C8  | F6  | -42.6(3)    |
| C3  | C2  | C7  | F3  | 9.4(6)      | C5  | C4 | C8  | F4  | -159.0(2)   |
| C3  | C2  | C7  | F1A | -146.1(5)   | C5  | C4 | C8  | F5  | 78.7(3)     |
| C3  | C2  | C7  | F2A | 92.5(6)     | C5  | C4 | C8  | F6A | -93.6(9)    |
| C3  | C2  | C7  | F3A | -30.7(5)    | C5  | C4 | C8  | F4A | 146.5(7)    |
| C3  | C2  | C7  | F2B | 159.7(6)    | C5  | C4 | C8  | F5A | 26.3(7)     |
| C3  | C2  | C7  | F1B | -64.5(6)    | C5  | C6 | C1  | C2  | -0.1(3)     |
| C3  | C2  | C7  | F3B | 48.6(5)     | C1  | C2 | C3  | C4  | -0.5(3)     |
| C3  | C2  | C1  | C6  | 0.3(3)      | C1  | C2 | C7  | F2  | -52.1(5)    |
| C3  | C4  | C8  | F6  | 138.4(2)    | C1  | C2 | C7  | F1  | 67.8(5)     |
| C3  | C4  | C8  | F4  | 22.1(3)     | C1  | C2 | C7  | F3  | -171.3(6)   |
| C3  | C4  | C8  | F5  | -100.3(3)   | C1  | C2 | C7  | F1A | 33.2(5)     |
| C3  | C4  | C8  | F6A | 87.4(9)     | C1  | C2 | C7  | F2A | -88.2(6)    |
| C3  | C4  | C8  | F4A | -32.5(7)    | C1  | C2 | C7  | F3A | 148.6(4)    |
| C3  | C4  | C8  | F5A | -152.7(7)   | C1  | C2 | C7  | F2B | -20.9(7)    |
| C3  | C4  | C5  | C6  | -0.5(3)     | C1  | C2 | C7  | F1B | 114.9(6)    |
| C12 | N4  | C13 | C15 | 106.5(2)    | C1  | C2 | C7  | F3B | -132.1(5)   |
| C12 | N4  | C13 | C14 | -130.7(2)   | C1  | C6 | C5  | C4  | 0.2(3)      |

Torsion Angles for 2190003 (compound **4a**)

| A   | B  | C   | D   | Angle/°  | A   | B  | C  | D  | Angle/°    |
|-----|----|-----|-----|----------|-----|----|----|----|------------|
| C12 | N3 | C11 | C10 | 77.5(2)  | C10 | N2 | C9 | O1 | -6.0(3)    |
| C12 | N3 | C16 | C17 | -95.8(2) | C10 | N2 | C9 | N1 | 174.59(18) |

Hydrogen Bonds for 2190004 (compound **4b**)

| D  | H  | A               | d(D-H)/Å | d(H-A)/Å | d(D-A)/Å | D-H-A/°   |
|----|----|-----------------|----------|----------|----------|-----------|
| N4 | H4 | O1              | 0.87(2)  | 2.04(2)  | 2.894(2) | 168.7(18) |
| N1 | H1 | O2 <sup>1</sup> | 0.90(2)  | 1.92(2)  | 2.784(2) | 160.3(19) |

Torsion Angles for 2190004 (compound **4b**)

| A  | B   | C   | D   | Angle/°     | A   | B   | C   | D   | Angle/°     |
|----|-----|-----|-----|-------------|-----|-----|-----|-----|-------------|
| F6 | C8  | C4  | C3  | 164.41(16)  | N3  | C12 | N4  | C13 | -178.24(15) |
| F6 | C8  | C4  | C5  | -17.38(19)  | N4  | C13 | C14 | C15 | 179.54(16)  |
| F1 | C7  | C2  | C3  | -93.9(10)   | N4  | C13 | C18 | C17 | 179.85(17)  |
| F1 | C7  | C2  | C1  | 85.7(10)    | C17 | C16 | C15 | C14 | -1.5(2)     |
| F2 | C7  | C2  | C3  | 154.7(10)   | C17 | C18 | C13 | C14 | -1.8(2)     |
| F2 | C7  | C2  | C1  | -25.7(10)   | C3  | C4  | C5  | C6  | -0.1(2)     |
| F4 | C8  | C4  | C3  | 43.70(19)   | C3  | C2  | C1  | C6  | -0.5(2)     |
| F4 | C8  | C4  | C5  | -138.10(16) | C3  | C2  | C7  | F1A | -106.7(5)   |
| F5 | C8  | C4  | C3  | -75.12(18)  | C3  | C2  | C7  | F2B | 162.6(6)    |
| F5 | C8  | C4  | C5  | 103.09(17)  | C3  | C2  | C7  | F3A | 7.3(7)      |
| F3 | C7  | C2  | C3  | 33.8(16)    | C3  | C2  | C7  | F1B | -62.1(4)    |
| F3 | C7  | C2  | C1  | -146.5(16)  | C3  | C2  | C7  | F2A | 143.9(7)    |
| O2 | C12 | N3  | C11 | 173.37(16)  | C3  | C2  | C7  | F3B | 46.4(3)     |
| O2 | C12 | N3  | C19 | -8.9(2)     | C1  | C2  | C7  | F1A | 72.9(5)     |
| O2 | C12 | N4  | C13 | 1.2(2)      | C1  | C2  | C7  | F2B | -17.8(6)    |
| O1 | C9  | N2  | C10 | 3.0(2)      | C1  | C2  | C7  | F3A | -173.0(7)   |
| O1 | C9  | N1  | C6  | 1.6(2)      | C1  | C2  | C7  | F1B | 117.5(4)    |
| N2 | C9  | N1  | C6  | -177.32(15) | C1  | C2  | C7  | F2A | -36.5(7)    |
| N2 | C10 | C11 | N3  | -152.19(15) | C1  | C2  | C7  | F3B | -134.0(3)   |
| N1 | C6  | C1  | C2  | 179.77(17)  | C1  | C6  | C5  | C4  | -0.6(2)     |
| N1 | C6  | C5  | C4  | -179.36(18) | C15 | C14 | C13 | C18 | 1.1(2)      |

**3a**

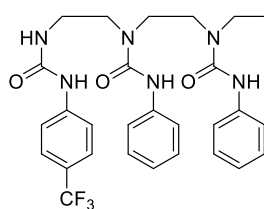

Identification code (CCDC)

**3a** (d16) (**2190005**)

Empirical formula

C<sub>29</sub>H<sub>32</sub>Cl<sub>3</sub>F<sub>3</sub>N<sub>6</sub>O<sub>3</sub>

|                                                |                                                               |
|------------------------------------------------|---------------------------------------------------------------|
| Formula weight                                 | 675.95                                                        |
| Temperature/K                                  | 100(2)                                                        |
| Crystal system                                 | monoclinic                                                    |
| Space group                                    | $P2_1/n$                                                      |
| $a/\text{\AA}$                                 | 11.9677(5)                                                    |
| $b/\text{\AA}$                                 | 20.0581(8)                                                    |
| $c/\text{\AA}$                                 | 14.2211(5)                                                    |
| $\alpha/^\circ$                                | 90                                                            |
| $\beta/^\circ$                                 | 111.923(2)                                                    |
| $\gamma/^\circ$                                | 90                                                            |
| Volume/ $\text{\AA}^3$                         | 3166.9(2)                                                     |
| Z                                              | 4                                                             |
| $\rho_{\text{calc}}/\text{cm}^3$               | 1.418                                                         |
| $\mu/\text{mm}^{-1}$                           | 0.348                                                         |
| F(000)                                         | 1400.0                                                        |
| Crystal size/ $\text{mm}^3$                    | $0.435 \times 0.392 \times 0.256$                             |
| Radiation                                      | MoK $\alpha$ ( $\lambda = 0.71073$ )                          |
| 2 $\theta$ range for data collection/ $^\circ$ | 3.812 to 56.328                                               |
| Index ranges                                   | $-15 \leq h \leq 15, -12 \leq k \leq 26, -18 \leq l \leq 18$  |
| Reflections collected                          | 29238                                                         |
| Independent reflections                        | 7652 [ $R_{\text{int}} = 0.0670, R_{\text{sigma}} = 0.0704$ ] |
| Data/restraints/parameters                     | 7652/0/414                                                    |
| Goodness-of-fit on $F^2$                       | 1.048                                                         |
| Final R indexes [ $ I  \geq 2\sigma(I)$ ]      | $R_1 = 0.0531, wR_2 = 0.1228$                                 |
| Final R indexes [all data]                     | $R_1 = 0.0875, wR_2 = 0.1392$                                 |
| Largest diff. peak/hole / $e \text{\AA}^{-3}$  | 0.68/-0.63                                                    |

Hydrogen Bonds for 2190005 (compound **3a**)

| D  | H  | A               | d(D-H)/ $\text{\AA}$ | d(H-A)/ $\text{\AA}$ | d(D-A)/ $\text{\AA}$ | D-H-A/ $^\circ$ |
|----|----|-----------------|----------------------|----------------------|----------------------|-----------------|
| N5 | H5 | O1 <sup>1</sup> | 0.85(3)              | 2.01(3)              | 2.812(2)             | 155(3)          |

Torsion Angles for 2190005 (compound **3a**)

| A  | B   | C   | D   | Angle/ $^\circ$ | A  | B   | C   | D   | Angle/ $^\circ$ |
|----|-----|-----|-----|-----------------|----|-----|-----|-----|-----------------|
| F1 | C28 | C25 | C24 | 69.4(3)         | N3 | C19 | C20 | N5  | 165.27(19)      |
| F1 | C28 | C25 | C26 | -112.3(2)       | N4 | C13 | C14 | C15 | 178.2(2)        |
| F2 | C28 | C25 | C24 | -49.5(3)        | N4 | C13 | C18 | C17 | -178.0(2)       |
| F2 | C28 | C25 | C26 | 128.9(2)        | N5 | C21 | N6  | C22 | 176.82(19)      |
| F3 | C28 | C25 | C24 | -170.8(2)       | N6 | C22 | C23 | C24 | -175.8(2)       |
| F3 | C28 | C25 | C26 | 7.5(3)          | N6 | C22 | C27 | C26 | 175.5(2)        |
| O1 | C3  | N1  | C2  | -7.9(3)         | C4 | C5  | C6  | C7  | -1.0(3)         |
| O1 | C3  | N1  | C10 | 176.8(2)        | C4 | C9  | C8  | C7  | -1.1(3)         |

Torsion Angles for 2190005 (compound **3a**)

| A  | B   | C   | D   | Angle/°     | A   | B   | C   | D   | Angle/°  |
|----|-----|-----|-----|-------------|-----|-----|-----|-----|----------|
| O1 | C3  | N2  | C4  | -0.9(3)     | C5  | C6  | C7  | C8  | 2.3(3)   |
| O2 | C12 | N3  | C11 | 2.1(3)      | C6  | C7  | C8  | C9  | -1.2(3)  |
| O2 | C12 | N3  | C19 | 179.4(2)    | C13 | C14 | C15 | C16 | 0.1(3)   |
| O2 | C12 | N4  | C13 | 16.3(3)     | C13 | C18 | C17 | C16 | -0.6(3)  |
| O3 | C21 | N5  | C20 | 2.6(3)      | C14 | C15 | C16 | C17 | 0.6(3)   |
| O3 | C21 | N6  | C22 | -4.0(3)     | C15 | C16 | C17 | C18 | -0.4(3)  |
| N1 | C3  | N2  | C4  | 177.66(19)  | C22 | C23 | C24 | C25 | 0.1(3)   |
| N1 | C10 | C11 | N3  | -163.33(18) | C22 | C27 | C26 | C25 | 0.5(3)   |
| N2 | C4  | C5  | C6  | -178.6(2)   | C23 | C24 | C25 | C26 | -2.1(3)  |
| N2 | C4  | C9  | C8  | 179.8(2)    | C23 | C24 | C25 | C28 | 176.3(2) |
| N3 | C12 | N4  | C13 | -164.17(19) | C24 | C25 | C26 | C27 | 1.8(3)   |

**Polymeric chains/helices**

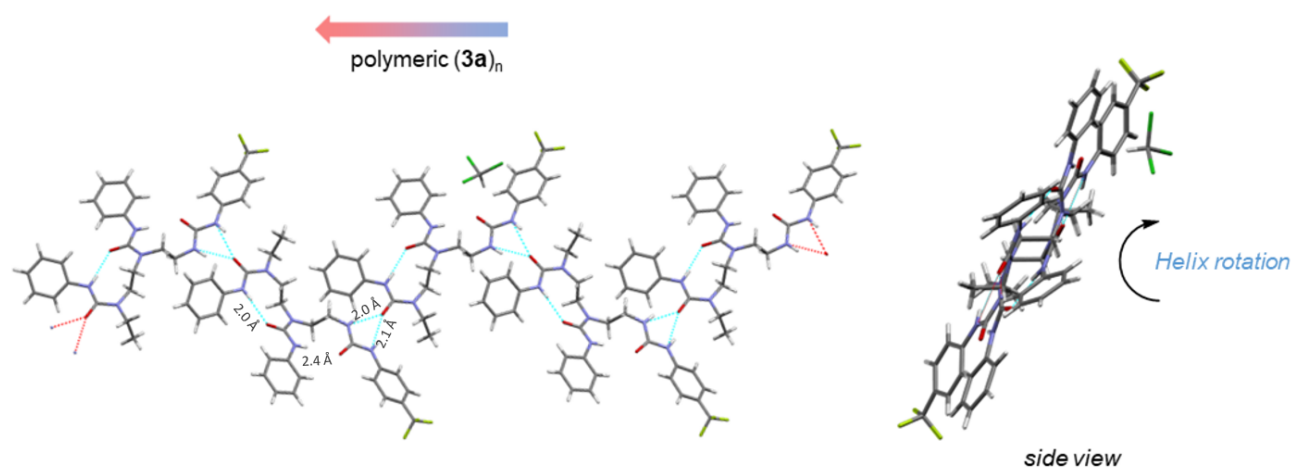

**Figure SI 7.** Supramolecular chains formed by head-to-tail arrangement of **3a** in the crystal structure.

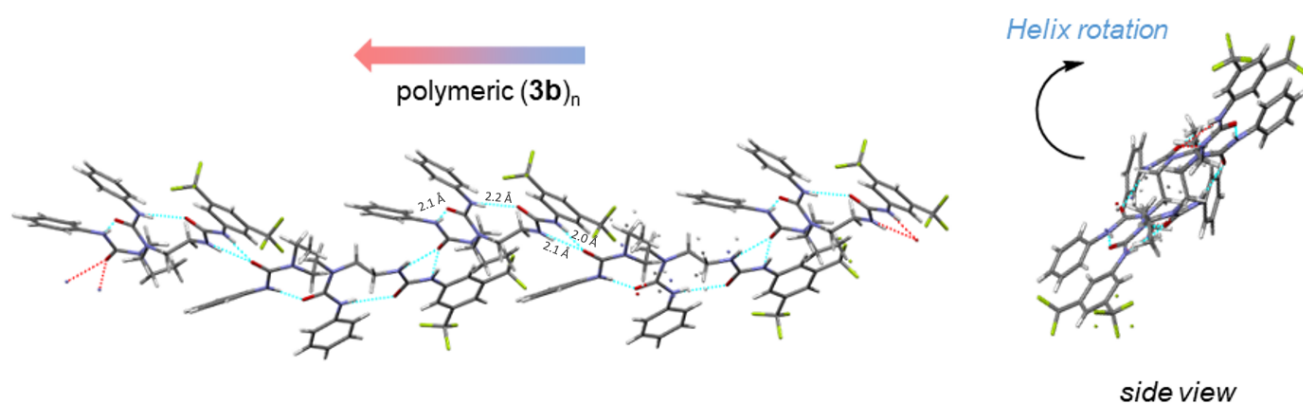

**Figure SI 8.** Supramolecular chains formed by head-to-tail arrangement of **3b** in the crystal structure.

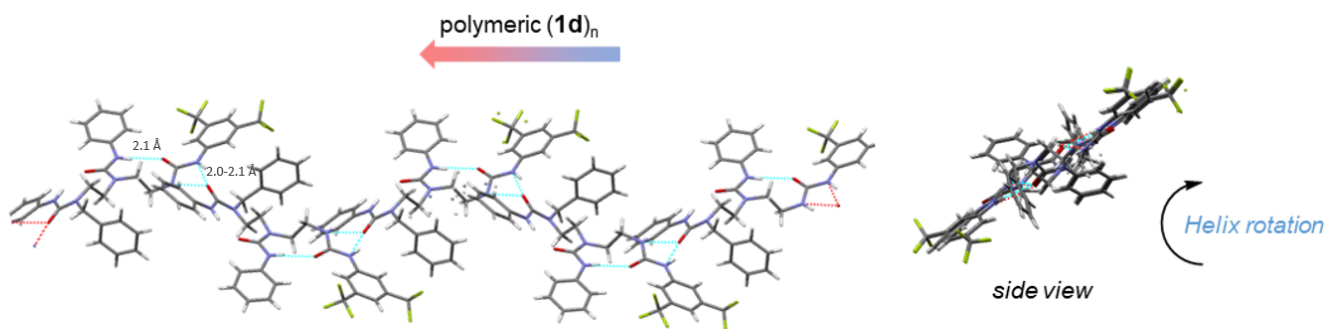

**Figure SI 9.** Supramolecular chains formed by head-to-tail arrangement of **1d** in the crystal structure.

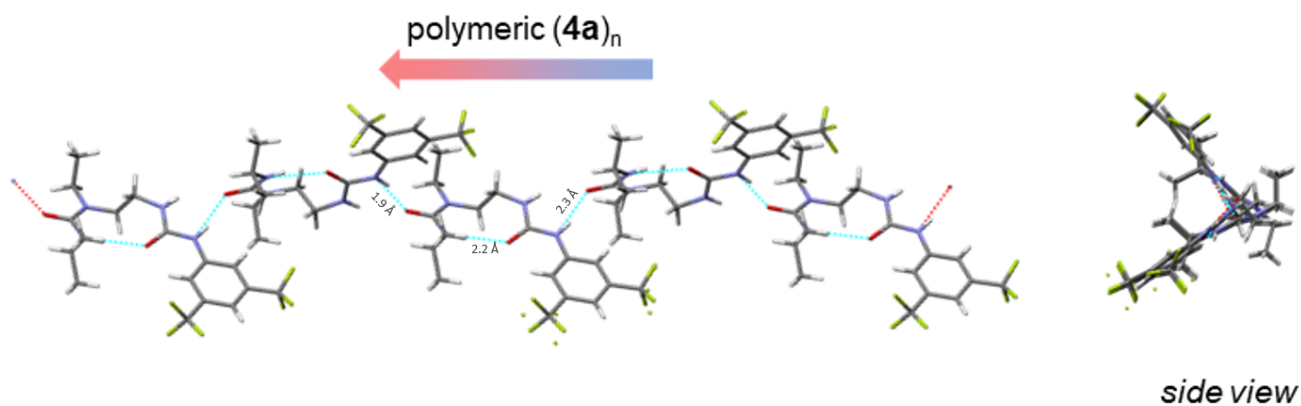

**Figure SI 10.** Supramolecular chains formed by head-to-tail arrangement of **4a** in the crystal structure.

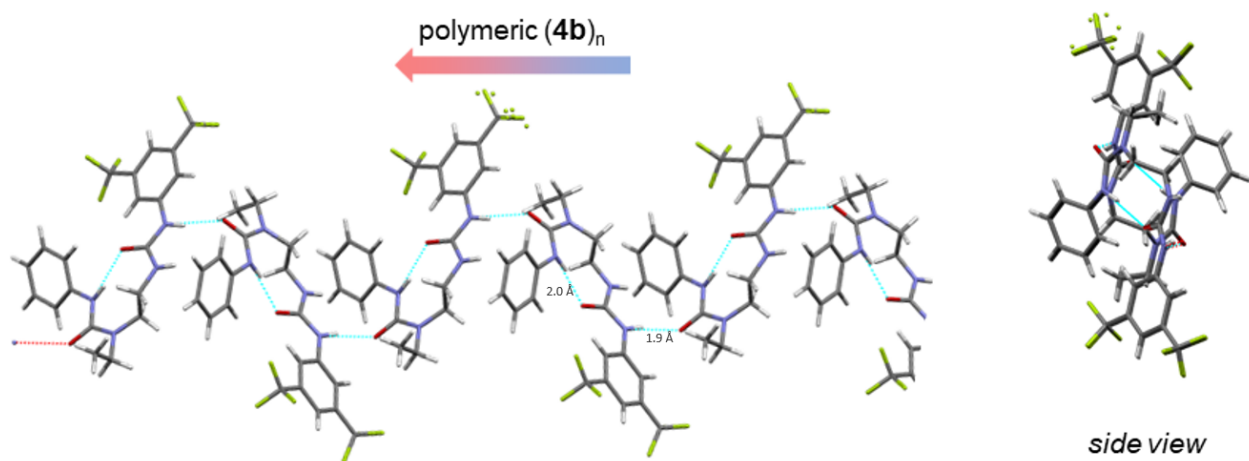

**Figure SI 11.** Supramolecular chains formed by head-to-tail arrangement of **4b** in the crystal structure.

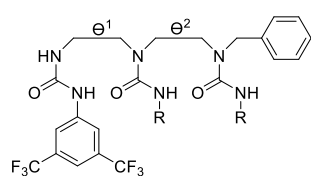

| Molecule              | $\Theta^1$ (°) | $\Theta^2$ (°) |
|-----------------------|----------------|----------------|
| <b>1a</b>             | 162            | 159            |
| <b>1b<sup>a</sup></b> | 162/161        | 154/158        |
| <b>1c<sup>a</sup></b> | 160/156        | 160/155        |
| <b>1d<sup>a</sup></b> | 159/172        | 165/163        |



|                       |         |     |
|-----------------------|---------|-----|
| <b>2a</b>             | 162     | 161 |
| <b>2b</b>             | 159     | 163 |
| <b>2c</b>             | 160     |     |
| <b>3a<sup>a</sup></b> | 163/165 |     |
| <b>3b</b>             | 162     |     |
| <b>4a</b>             | 162     |     |
| <b>4b</b>             | 152     |     |

a) Twin structure

**Table SI 1.** Measured torsion angles for N-C-C-N bonds of ethylene bridge in the crystal structures.

## 6. NMR studies

### 6.1 NMR Spectrometer Data and Pulse Sequences

NMR experiments in this section were performed on a Bruker Avance III HD 500 Cryo equipped with 5 mm DCH 13C–1H/D Cryo Probe (500 MHz). The temperature in the VT experiments was controlled by Bruker BCU II unit. TMS or solvent residual peak (5.32 ppm for CD<sub>2</sub>Cl<sub>2</sub>) were used as references for <sup>1</sup>H and <sup>13</sup>C chemical shifts. The spectra were plotted in Mestrenova 14.2.1 or TopSpin 4.1.4 using standard processing methods.

Standard Bruker pulse sequences with the following parameters were used throughout the work.

<sup>1</sup>H-NMR: zg30; Relaxation delay = 2 s, Acquisition time = 4.36 s, SW = 30.0 ppm, TD = 64k, NS = 8 – 32.

<sup>13</sup>C{<sup>1</sup>H}-NMR: Pulse program: zgpg30; Relaxation delay = 1.00 s, Acquisition time = 1.90 s, SW = 248.0 ppm, TD = 120k, NS = 512.

1D selective NOESY: Pulse program: selnogpzs with 180° Gaussian shaped pulse; Relaxation delay = 2.0 s, Acquisition time = 3.21 s, SW = 20.0 ppm, TD = 64k, NS = 128, mixing time D8 = 300 ms.

1D selective ROESY: Pulse program: selrogp with 180° Gaussian shaped pulse; Relaxation delay = 2.0 s, Acquisition time = 3.28 s, SW = 20.0 ppm, TD = 64k, NS = 64 - 128, spinlock time P15 = 200 ms.

<sup>1</sup>H,<sup>1</sup>H-COSY: pulse program: cosygpmfppqf; Relaxation delay = 0.92 s, Acquisition time = 0.18 s (F2), SW = 12.0 ppm (F2), 12.0 ppm (F1); TD = 4k (F2), 256 (F1), NS = 2.

<sup>1</sup>H,<sup>13</sup>C-HSQC: pulse program: hsqcedetgpsp.3; Relaxation delay = 0.8 s, Acquisition time = 0.07 s (F2), SW = 14.0 ppm (F2), 165 ppm (F1); TD = 1k (F2), 256 (F1), NS = 2, cnst2 = 145 Hz.

<sup>1</sup>H,<sup>13</sup>C-HMBC: Pulse program: hmbcetgpl3nd; Relaxation delay = 1.5 s, Acquisition time = 0.27 s, SW = 15.0 ppm (F2), 240 ppm (F1), TD = 4k (F2), 512 (F1), NS = 4, cnst13 = 8 Hz.

<sup>1</sup>H,<sup>1</sup>H-ROESY: Pulse program: roesyadjsphpp; Relaxation delay = 2.5 s, Acquisition time = 0.14 s, SW = 15 ppm (F2), 15 ppm (F1), TD = 6k (F2), 256 (F1), NS = 8, spinlock time = 200 ms.

<sup>1</sup>H DOSY: Pulse program ledbpgp2s. Relaxation delay = 2 s, Acquisition time = 2.18 s, SW = 30.0 ppm, 16 experiments with variable gradient strength (5 – 95 %), DS = 4, NS = 16, P30 =  $\delta/2$  = 1.8 ms, D20 = 10 – 40 ms.

<sup>1</sup>H DOSY with convection compensation: Pulse program dstepbpgp3s. Relaxation delay = 5 s, Acquisition time = 2.18 s, SW = 30.0 ppm, 16 experiments with variable gradient strength (5 – 95 % using quadratic ramp), DS = 4, NS = 16, P30 =  $\delta/2$  = 1.8 ms, D20 = 20 – 30 ms.

## 6.2 Structural Identification

### Assignment of Chemical Shifts

$^1\text{H}$  NMR (500 MHz,  $\text{CD}_2\text{Cl}_2$ , 248 K):

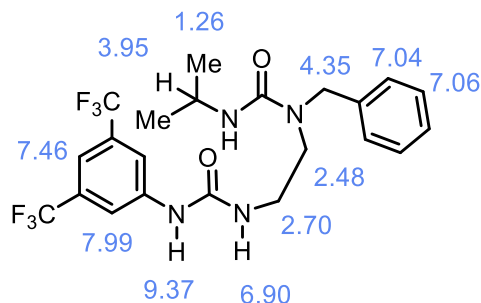

$^{13}\text{C}\{^1\text{H}\}$  NMR (125 MHz,  $\text{CD}_2\text{Cl}_2$ , 248 K):

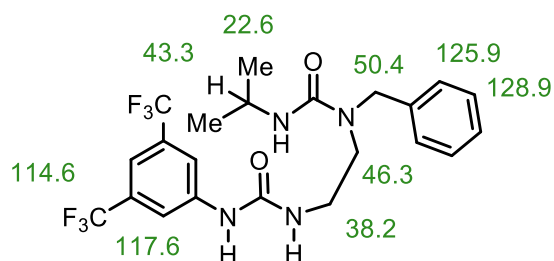

**Figure SI 12.** Assignment of  $^1\text{H}$  and  $^{13}\text{C}$  NMR shifts (500 MHz,  $\text{CD}_2\text{Cl}_2$ , 32 mM) of **2a** at 248 K.

$^1\text{H}$  NMR (500 MHz, acetone- $d_6$ , 298 K):

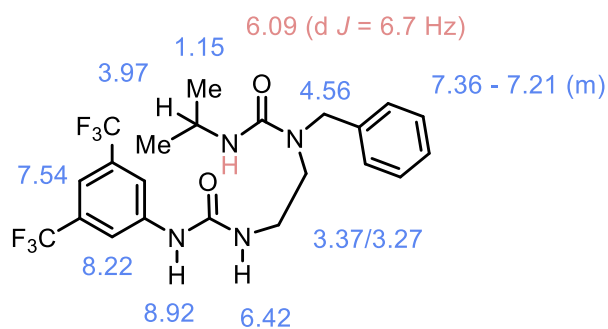

**Figure SI 13.** Assignment of  $^1\text{H}$  NMR shifts (500 MHz, acetone- $d_6$ , 32 mM) of **2a** at 298 K.

$^1\text{H}$  NMR (500 MHz,  $\text{CD}_2\text{Cl}_2$ , 258 K):

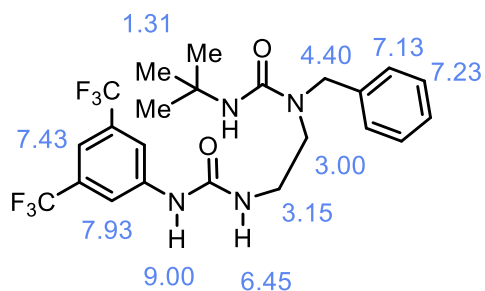

$^{13}\text{C}\{^1\text{H}\}$  NMR (125 MHz,  $\text{CD}_2\text{Cl}_2$ , 258 K):

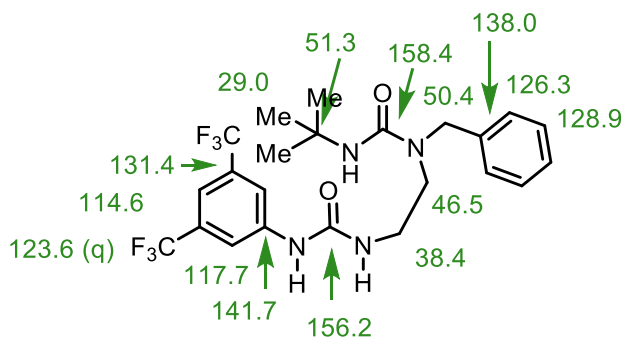

**Figure SI 14.** Assignment of  $^1\text{H}$  and  $^{13}\text{C}$  NMR shifts (500 MHz,  $\text{CD}_2\text{Cl}_2$ , 52 mM) of **2b** at 258 K.

### 6.3 NMR Spectra at variable temperature and varying solvents

#### Compound 2a

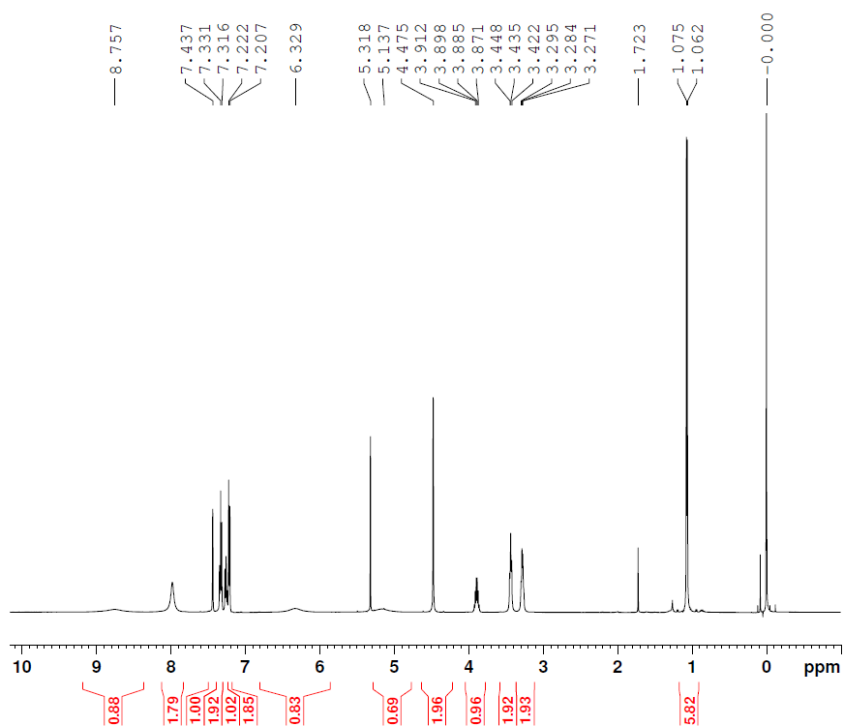

Figure SI 15.  $^1\text{H}$  NMR spectrum (500 MHz,  $\text{CD}_2\text{Cl}_2$ , 32 mM) of **2a** at 298 K.

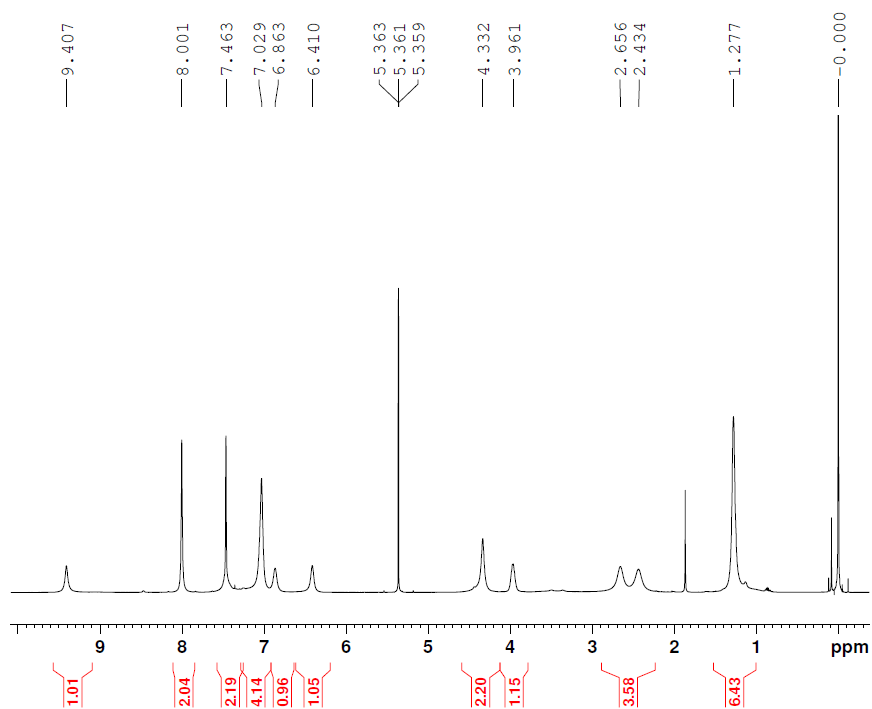

Figure SI 16.  $^1\text{H}$  NMR spectrum (500 MHz,  $\text{CD}_2\text{Cl}_2$ , 32 mM) of **2a** at 248 K.

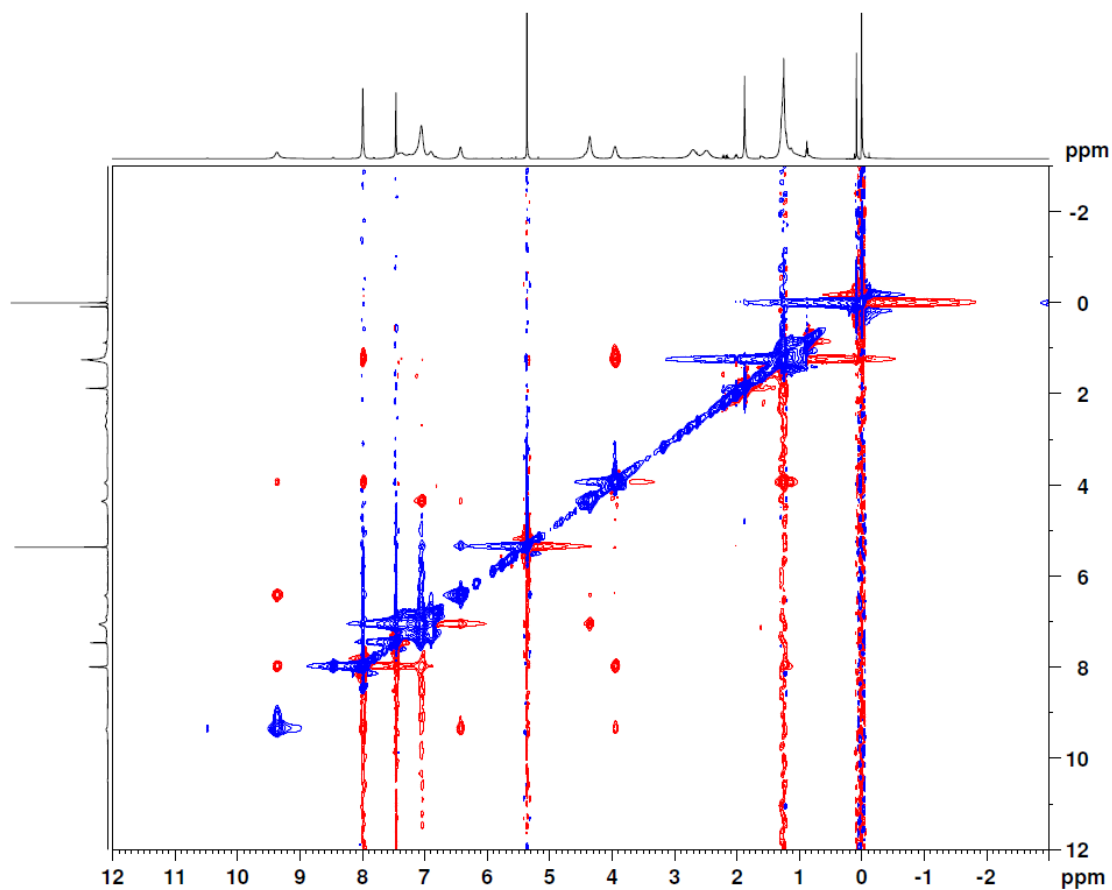

Figure SI 17. 2D ROESY spectrum (500 MHz, CD<sub>2</sub>Cl<sub>2</sub>) of **2a** at 248 K.

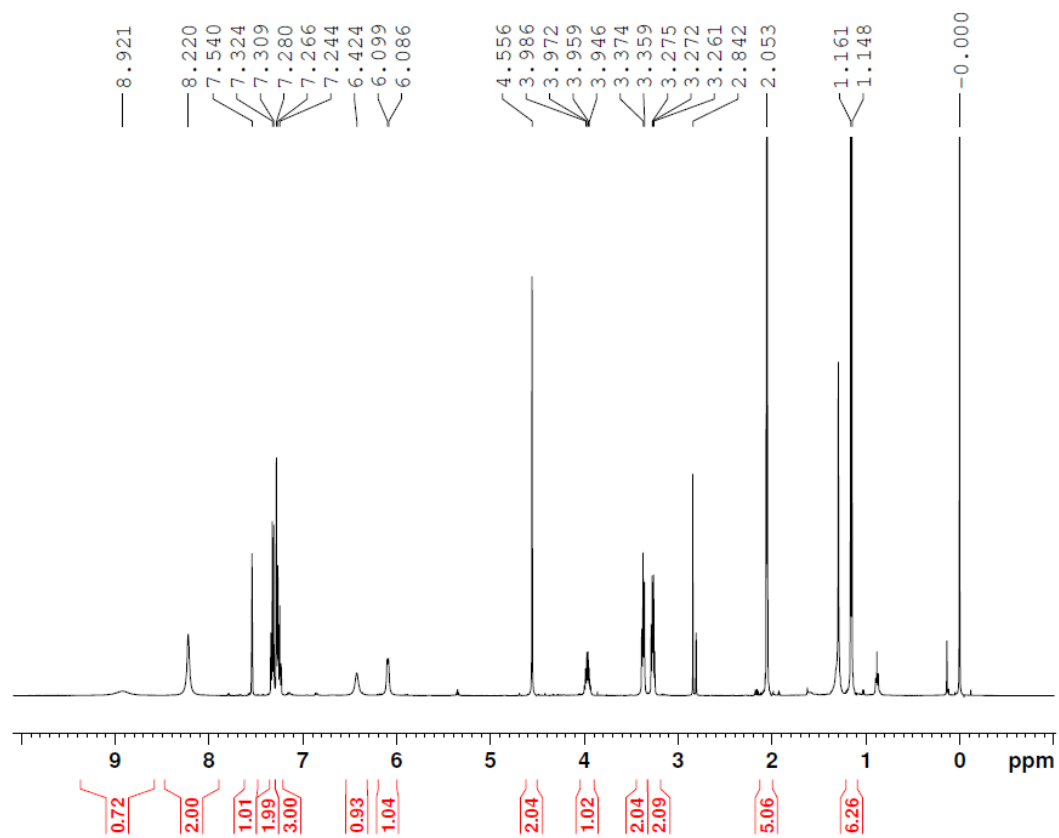

Figure SI 18.  $^1\text{H}$  NMR spectrum (500 MHz, acetone- $d_6$ , 25mM) of **2a** at 298 K.

Compound 2b

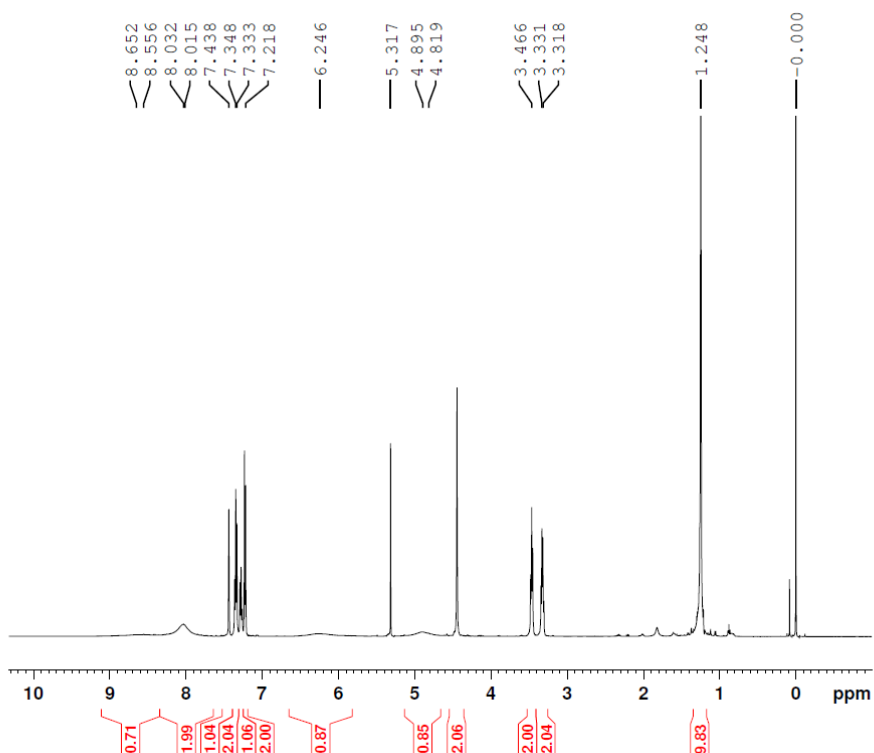

Figure SI 19.  $^1\text{H}$  NMR spectrum (500 MHz,  $\text{CD}_2\text{Cl}_2$ , 52 mM) of **2b** at 298 K.

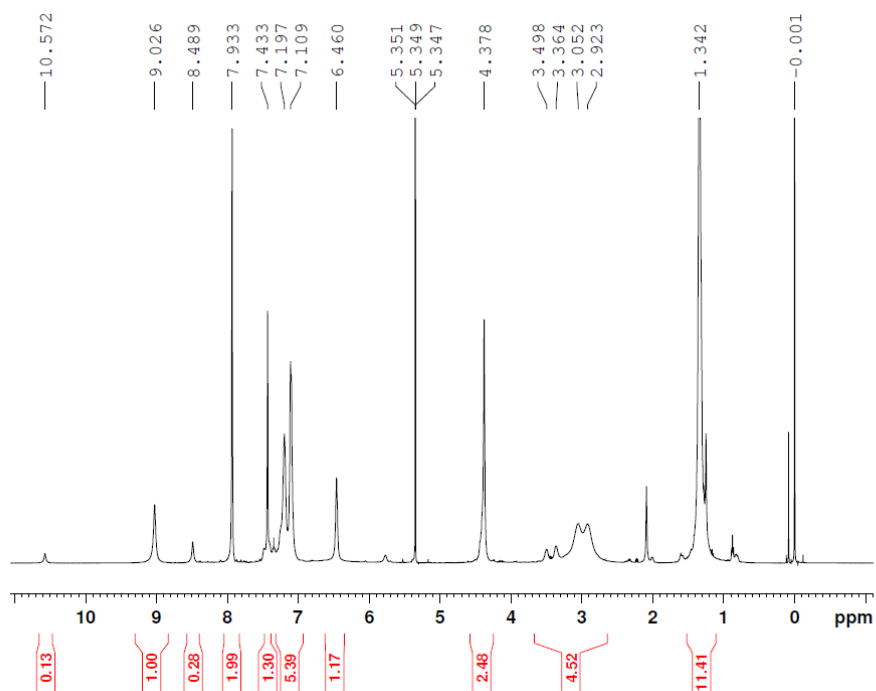

Figure SI 20.  $^1\text{H}$  NMR spectrum (500 MHz,  $\text{CD}_2\text{Cl}_2$ , 52 mM) of **2b** at 258 K.

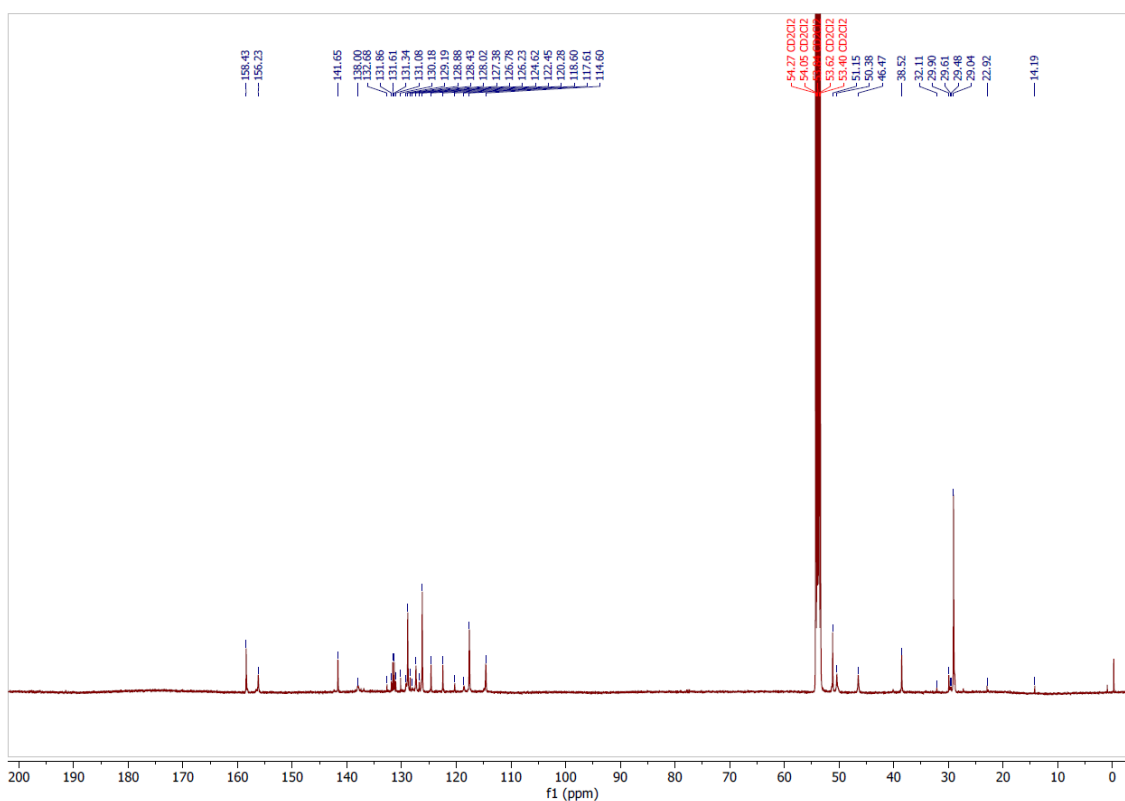

**Figure SI 21.**  $^{13}\text{C}$  NMR spectrum (126 MHz,  $\text{CD}_2\text{Cl}_2$ , 52 mM) of **2b** at 258 K.

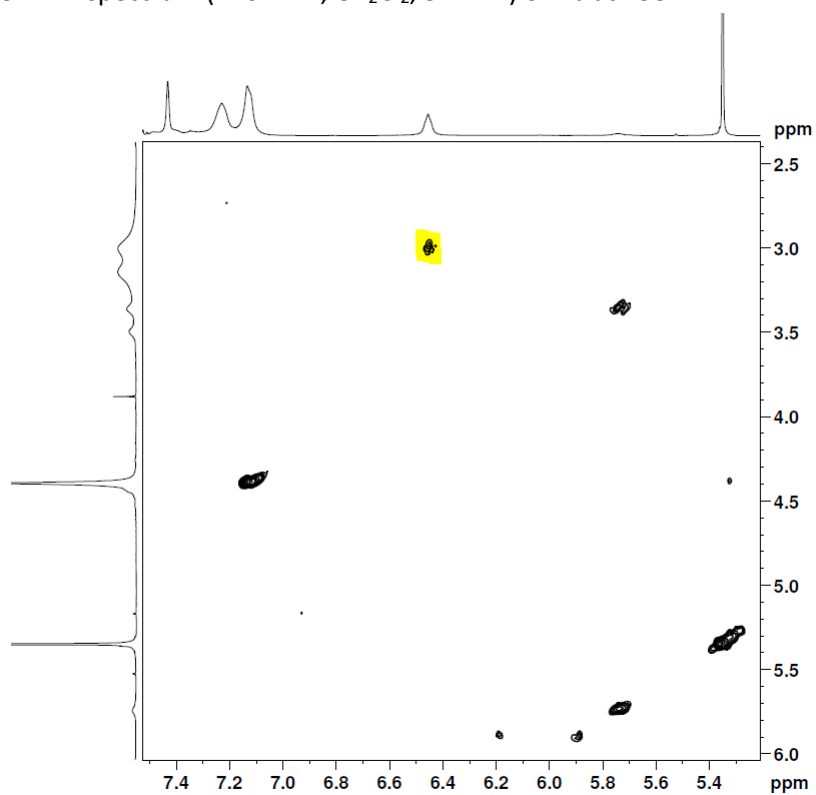

**Figure SI 22.**  $^1\text{H}$ ,  $^1\text{H}$ -COSY spectrum (500 MHz,  $\text{CD}_2\text{Cl}_2$ , 52 mM) of **2b** at 258 K, showing a correlation (in yellow) between the upfield aryl urea NH ( $\delta_{\text{H}}$  6.45 ppm) and ethylene bridge ( $\delta_{\text{H}}$  3.00 ppm).

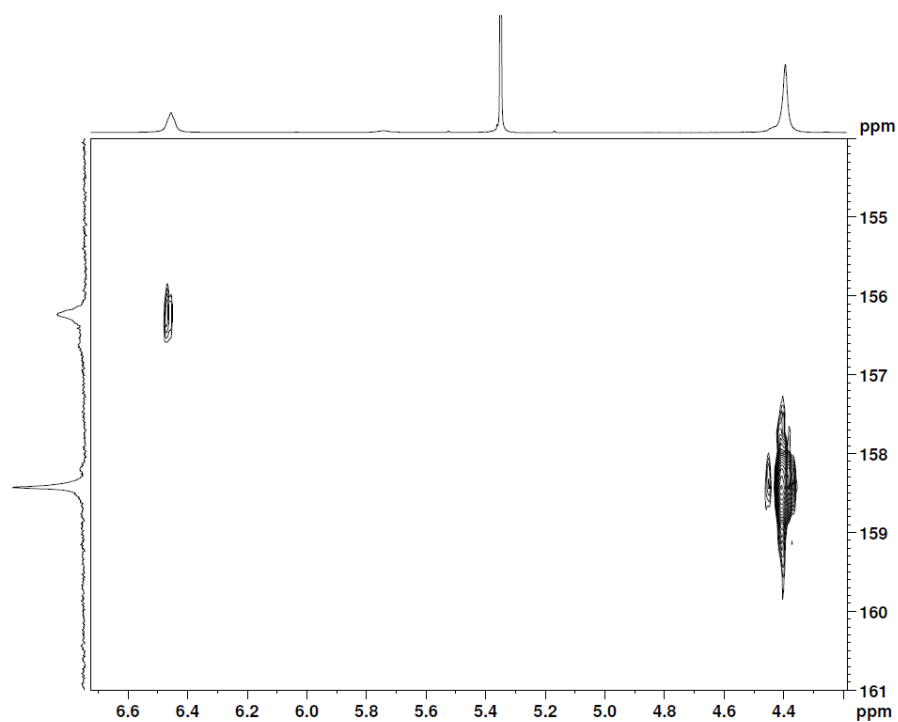

**Figure SI 23.**  $^1\text{H}$ ,  $^{13}\text{C}$ -HMBC spectrum ( $\text{CD}_2\text{Cl}_2$ , 52 mM) of **2b** at 258 K, showing a correlation between the upfield aryl urea NH ( $\delta_{\text{H}}$  6.45 ppm) aryl urea carbonyl ( $\delta_{\text{C}}$  156.2 ppm); as well as a correlation between benzylic protons ( $\delta_{\text{H}}$  4.40 ppm) and alkyl urea carbonyl ( $\delta_{\text{C}}$  158.4 ppm)

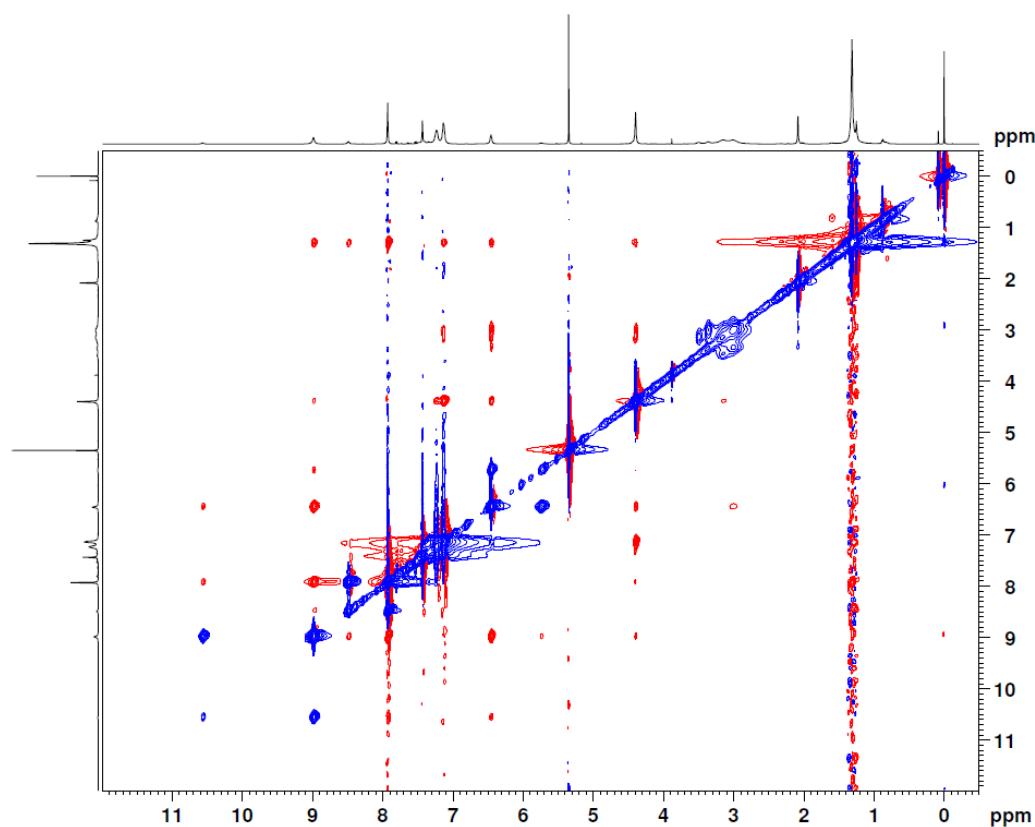

**Figure SI 24.** 2D ROESY spectrum (500 MHz,  $\text{CD}_2\text{Cl}_2$ ) of **2b** at 258 K.



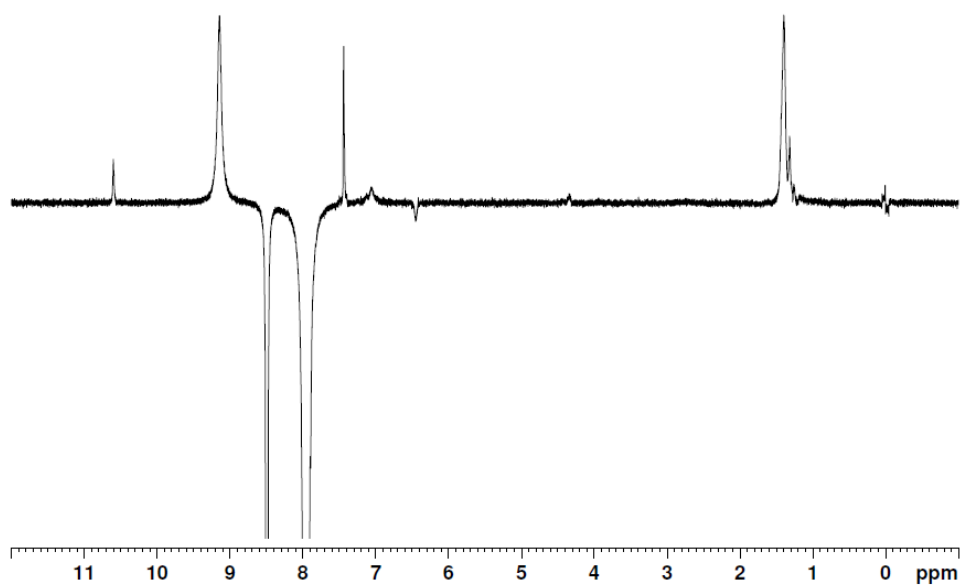

**Figure SI 25.** 1D ROESY spectrum (500 MHz,  $\text{CD}_2\text{Cl}_2$ ) of **2b** at 248 K. Signal at 7.93 ppm was irradiated (aryl urea CH), showing exchange with a intra H-bonded monomer, as well as through-space correlations with aryl urea NH and *t*-Bu group.

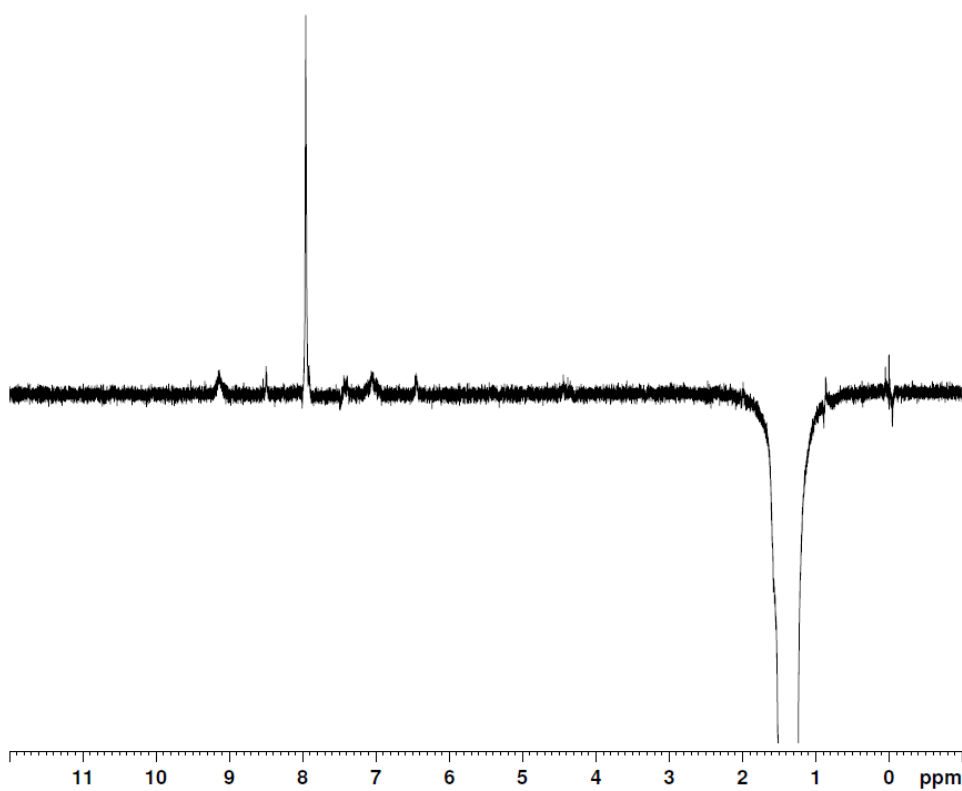

**Figure SI 26.** 1D ROESY spectrum (500 MHz,  $\text{CD}_2\text{Cl}_2$ ) of **2b** at 248 K. Signal at 1.25 ppm was irradiated (*t*-Bu group), showing through-space correlation with aryl urea NHs and  $(\text{CF}_3)_2\text{C}_6\text{H}_3$ -aryl ring.

## 6.4 Variable Temperature (VT) NMR

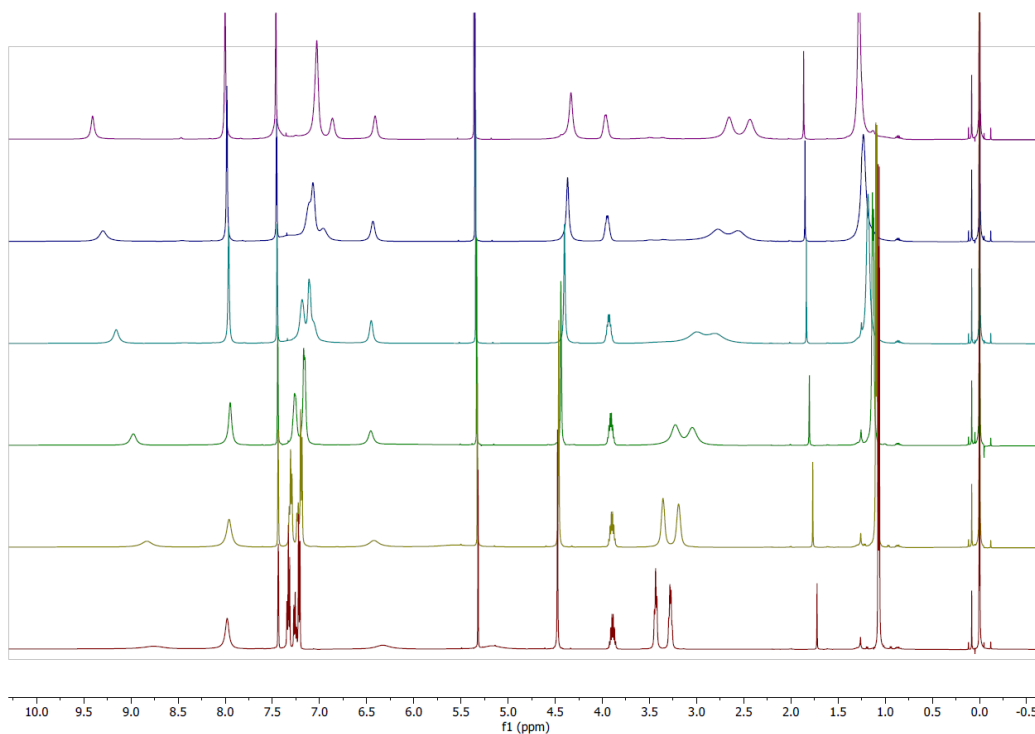

**Figure SI 27.** Variable temperature <sup>1</sup>H NMR spectra of **2a** (32 mM, CD<sub>2</sub>Cl<sub>2</sub>) at different temperatures (bottom: 298 K, top: 248 K in 10 K increments).

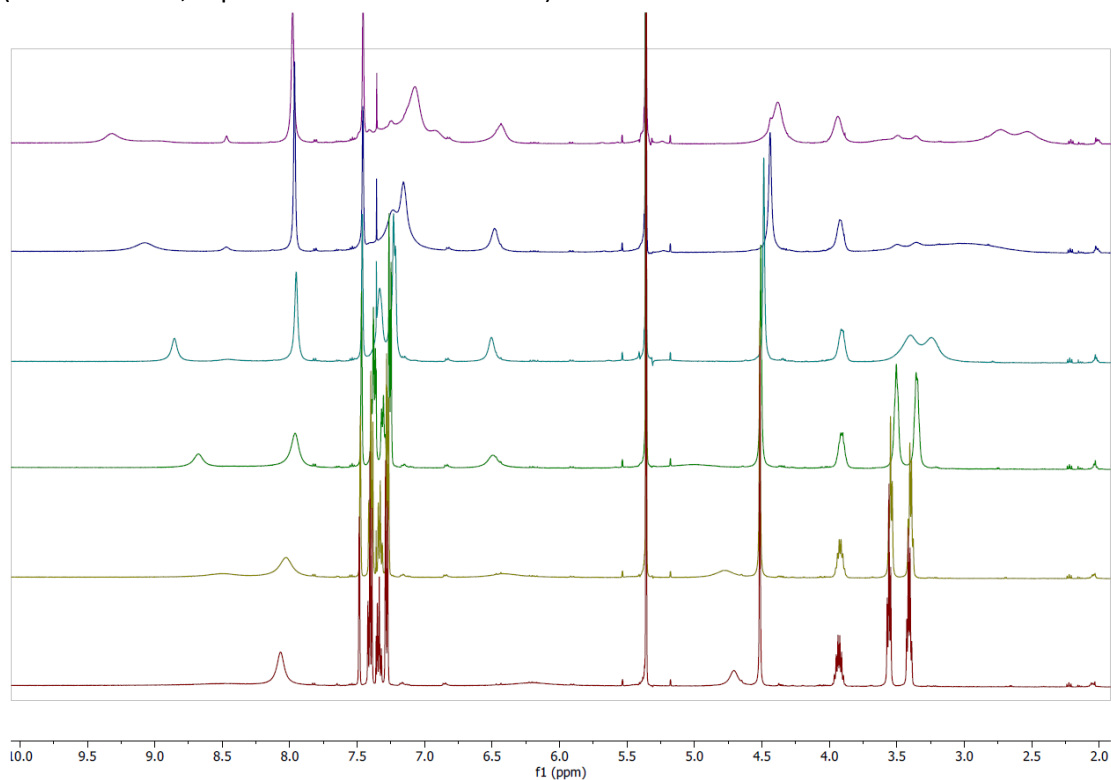

**Figure SI 28.** Variable temperature <sup>1</sup>H NMR spectra of **2a** (6.4 mM, CD<sub>2</sub>Cl<sub>2</sub>) at different temperatures (bottom: 298 K, top: 248 K in 10 K increments).

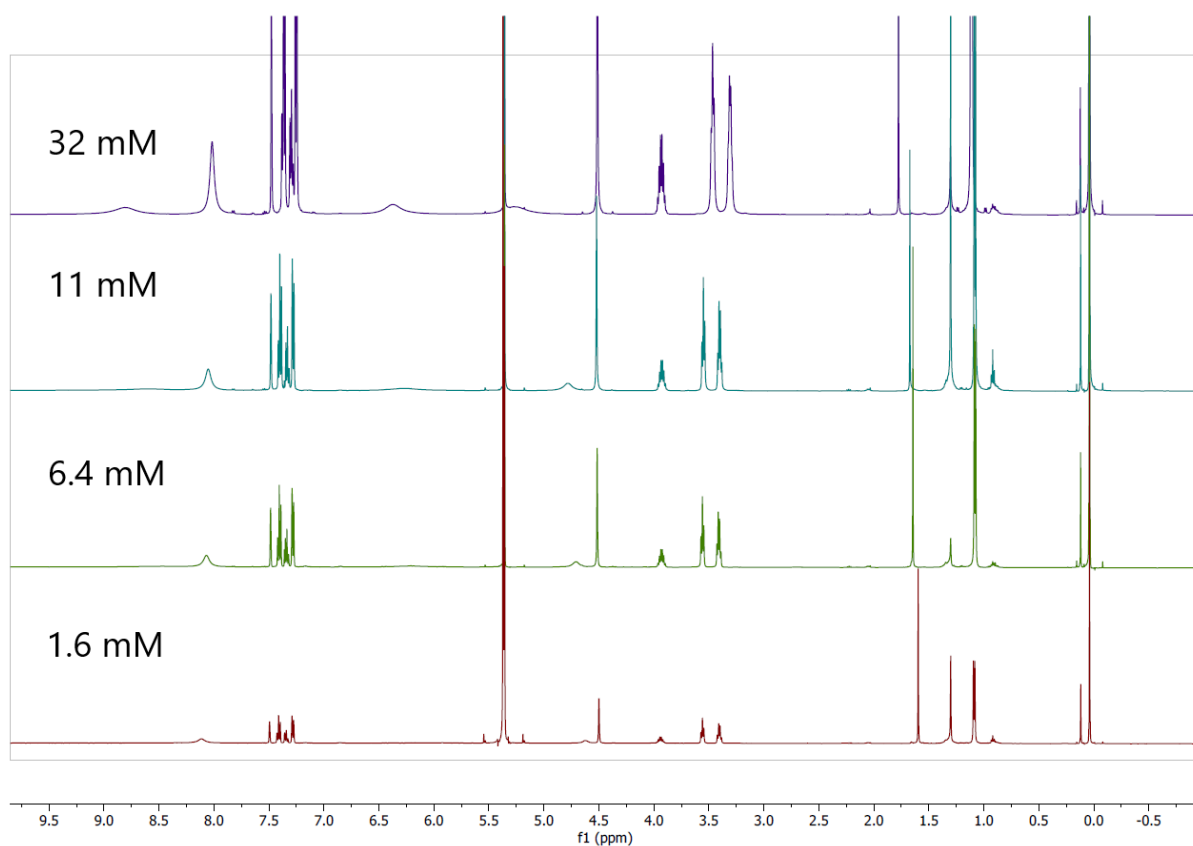

**Figure SI 29.**  $^1\text{H}$  NMR spectra of **2a** (298 K,  $\text{CD}_2\text{Cl}_2$ ) at different concentrations.

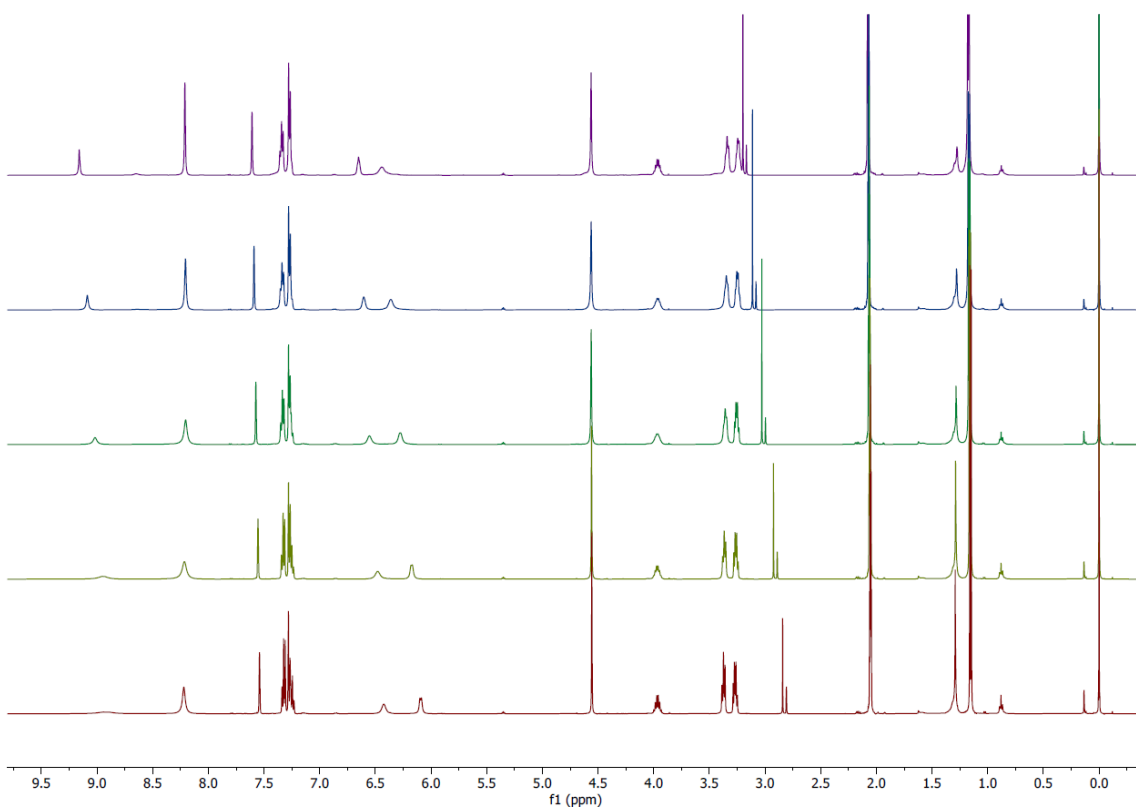

**Figure SI 30.** Variable temperature  $^1\text{H}$  NMR spectra of **2a** (25 mM,  $\text{acetone-}d_6$ ) at different temperatures (bottom: 298 K, top: 258 K in 10 K increments).

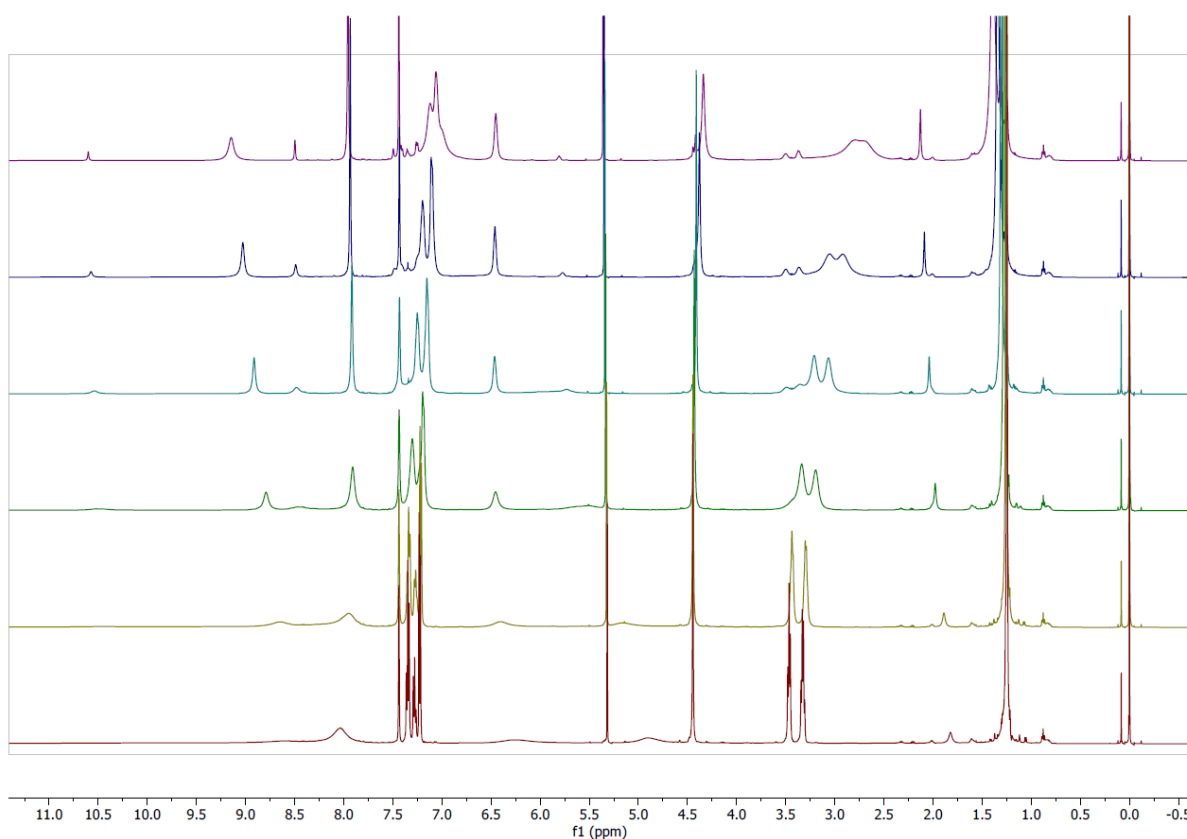

**Figure SI 31.** Variable temperature  $^1\text{H}$  NMR spectra of **2b** (52 mM,  $\text{CD}_2\text{Cl}_2$ ) at different temperatures (bottom: 298 K, top: 248 K in 10 K increments).

## 6.5 DOSY Experiments

The  $^1\text{H}$  diffusion measurements<sup>2</sup> were performed in  $\text{CD}_2\text{Cl}_2$  or acetone- $d_6$  with the DSTE (double stimulated echo) pulse sequence using LED, convection compensation, and bipolar gradients, developed by Müller and Jerschow.<sup>3</sup> For the z-gradient strengths, values of 100, -13.17, -17.13 and -15.37% were used. Tetramethylsilane (TMS) was added as reference for the  $^1\text{H}$  chemical shifts and for temperature and was used for viscosity corrections of the diffusion coefficients of the analytes.<sup>4</sup> The solvent residual peak represented additional internal reference. Diffusion delay (d20) was optimized for the urea molecules. Concentration-dependent DOSY measurements were done at 288 K, further away from the boiling point of DCM.

Signal intensities were fitted to the Stejskal-Tanner equation in Mestrenova 14.2.1 (or TopSpin 4.1.4 T1/T2 relaxation module for the ledbpgp2s pulse sequence). Typically, a well-separated benzylic  $\text{CH}_2$  peak (singlet) of the urea was chosen for the fitting. In concentrated samples, the TMS peak was often distorted.

$^1\text{H}$  DOSY: Pulse program ledbpgp2s. Relaxation delay = 2 s, Acquisition time = 2.18 s, SW = 30.0 ppm, 16 experiments with variable gradient strength (5 – 95%), DS = 4, NS = 16, P30 =  $\delta/2$  = 1.8 ms, D20 = 10 – 40 ms.

$^1\text{H}$  DOSY with convection compensation: Pulse program dstebpgp3s. Relaxation delay = 5 s, Acquisition time = 2.18 s, SW = 30.0 ppm, 16 experiments with variable gradient strength (5 – 95% using quadratic ramp), DS = 4, NS = 16, P30 =  $\delta/2$  = 1.8 ms, D20 = 20 – 30 ms.

The estimated molecular weight of the urea was calculated:<sup>5</sup>

$$M_A = \left( \frac{D_{\text{ref}}}{D_A} \right)^{1.72} M_{\text{ref}}$$

Hydrodynamic radius was calculated using viscosity correction from the standard as follows:

$$c(\text{Chen}) = \frac{6F}{1 + 0.695 \left( \frac{r_{\text{solv}}}{r_{\text{ref}}} \right)^{2.234}} ; F = 1 \text{ for spheres}$$

$$\eta = \frac{kT \left( 1 + 0.695 \left( \frac{r_{\text{solv}}}{r_{\text{ref}}} \right)^{2.234} \right)}{6\pi D_{\text{ref}} r_{\text{ref}}}$$

$$D[\text{m}^2/\text{s}] = \frac{kT}{F c \pi \eta r_A}$$

$r_{\text{solv}} = 2.46 \text{ \AA}$ ;  $r_{\text{ref}} = 2.96 \text{ \AA}$ .

#### Diffusion Data

| Concentration<br>(288 K)  | D(TMS)   | D(CHDCl <sub>2</sub> ) |
|---------------------------|----------|------------------------|
| 32 mM                     | 2.47E-09 | 3.28E-09               |
| 11 mM                     | 2.45E-09 | 3.29E-09               |
| 6.4 mM                    | 2.48E-09 | 3.35E-09               |
| 1.3 mM                    | 2.45E-09 | 3.36E-09               |
| Lit. (298 K) <sup>5</sup> | 2.37E-9  | 3.47E-9                |

**Table S12.** Diffusion coefficients of TMS and CHDCl<sub>2</sub> (500 MHz, CD<sub>2</sub>Cl<sub>2</sub>, 288 K) at different sample concentrations showing the reliability of the convection-compensated pulse sequence and reproducibility of the data.

| [urea]<br>[mM] | T<br>[K] | D (urea)<br>[m <sup>2</sup> s <sup>-1</sup> ] | D (TMS)<br>[m <sup>2</sup> s <sup>-1</sup> ] | viscosity | MW<br>[g·mol <sup>-1</sup> ] | r <sub>A</sub> [Å] | D (CHDCl <sub>2</sub> )<br>[m <sup>2</sup> s <sup>-1</sup> ] | viscosity | MW<br>[g·mol <sup>-1</sup> ] | r <sub>A</sub> [Å] |
|----------------|----------|-----------------------------------------------|----------------------------------------------|-----------|------------------------------|--------------------|--------------------------------------------------------------|-----------|------------------------------|--------------------|
| 32             | 288      | 6.82E-10                                      | 2.47E-09                                     | 4.21E-14  | 806.9                        | 10.72              | 3.28E-09                                                     | 4.43E-14  | 1280.4                       | 10.19              |
| 18             | 288      | 7.89E-10                                      | 2.43E-09                                     | 4.28E-14  | 610.6                        | 9.12               | 3.26E-09                                                     | 4.46E-14  | 986.1                        | 8.75               |
| 11             | 288      | 8.41E-10                                      | 2.45E-09                                     | 4.24E-14  | 554.9                        | 8.62               | 3.29E-09                                                     | 4.42E-14  | 897.6                        | 8.29               |
| 6.4            | 288      | 8.94E-10                                      | 2.48E-09                                     | 4.19E-14  | 510.1                        | 8.21               | 3.35E-09                                                     | 4.34E-14  | 833.5                        | 7.94               |
| 1.3            | 288      | 9.52E-10                                      | 2.45E-09                                     | 4.24E-14  | 448.3                        | 7.62               | 3.36E-09                                                     | 4.32E-14  | 752.0                        | 7.48               |

**Table S13.** Diffusion data for **2a** in CD<sub>2</sub>Cl<sub>2</sub> at 288 K for different concentrations.

| [urea] [mM] | <i>T</i> [K] | D (urea) [m <sup>2</sup> s <sup>-1</sup> ] | D (TMS) [m <sup>2</sup> s <sup>-1</sup> ] | viscosity | MW [g·mol <sup>-1</sup> ] | <i>r<sub>A</sub></i> [Å] | D (CHDCl <sub>2</sub> ) [m <sup>2</sup> s <sup>-1</sup> ] | viscosity | MW [g·mol <sup>-1</sup> ] | <i>r<sub>A</sub></i> [Å] |
|-------------|--------------|--------------------------------------------|-------------------------------------------|-----------|---------------------------|--------------------------|-----------------------------------------------------------|-----------|---------------------------|--------------------------|
| 6.4         | <b>288</b>   | 8.94E-10                                   | 2.48E-09                                  | 4.19E-14  | 510.1                     | 8.21                     | 3.35E-09                                                  | 4.34E-14  | 833.5                     | 7.94                     |
| 6.4         | <b>278</b>   | 7.43E-10                                   | 2.17E-09                                  | 4.63E-14  | 557.3                     | 8.64                     | 2.86E-09                                                  | 4.90E-14  | 873.0                     | 8.15                     |
| 6.4         | <b>268</b>   | 6.02E-10                                   | 1.88E-09                                  | 5.15E-14  | 625.3                     | 9.24                     | 2.49E-09                                                  | 5.43E-14  | 987.9                     | 8.76                     |
| 6.4         | <b>258</b>   | 4.71E-10                                   | 1.68E-09                                  | 5.54E-14  | 786.0                     | 10.56                    | 2.22E-09                                                  | 5.86E-14  | 1236.7                    | 9.99                     |
| 6.4         | <b>248</b>   | 3.50E-10                                   | 1.40E-09                                  | 6.4E-14   | 957.2                     | 11.84                    | 1.85E-09                                                  | 6.76E-14  | 1506.2                    | 11.20                    |

**Table SI 4.** Diffusion data for **2a** in CD<sub>2</sub>Cl<sub>2</sub> for different temperatures.

| [urea] [mM] | <i>T</i> [K] | <i>r<sub>A</sub></i> [Å] | <i>V</i> [Å <sup>3</sup> ] | <i>N</i> |
|-------------|--------------|--------------------------|----------------------------|----------|
| 6.4         | <b>288</b>   | 7.94                     | 2095.52                    | 1.26     |
| 6.4         | <b>278</b>   | 8.15                     | 2271.44                    | 1.36     |
| 6.4         | <b>268</b>   | 8.76                     | 2818.24                    | 1.69     |
| 6.4         | <b>258</b>   | 9.99                     | 4170.29                    | 2.50     |
| 6.4         | <b>248</b>   | 11.20                    | 5881.40                    | 3.53     |

**Table SI 5.** Extracted hydrodynamic radius of **2a** in CD<sub>2</sub>Cl<sub>2</sub> at different temperatures, volume of the corresponding sphere ( $4/3\pi r^3$ ), and aggregation number *N* ( $V/V^0$ ), where  $V^0$  is the calculated volume of the monomer using the extrapolated radius (7.35 Å).

| [urea] [mM] | <i>T</i> [K] | MW [g·mol <sup>-1</sup> ] | <i>N</i> | <i>N(N-1)</i> |
|-------------|--------------|---------------------------|----------|---------------|
| 1.3         | <b>288</b>   | 751.96                    | 1.53     | 0.82          |
| 6.4         | <b>288</b>   | 833.53                    | 1.70     | 1.19          |
| 11          | <b>288</b>   | 897.58                    | 1.83     | 1.52          |
| 32          | <b>288</b>   | 1280.38                   | 2.61     | 4.21          |

**Table SI 6.** Extracted molecular mass of **2a** in CD<sub>2</sub>Cl<sub>2</sub> at different concentrations. Aggregation number  $N = MW/490 \text{ g}\cdot\text{mol}^{-1}$ .

| [urea] [mM] | <i>T</i> [K] | <i>r<sub>A</sub></i> [Å] | <i>V</i> [Å <sup>3</sup> ] | <i>N</i> | <i>N(N-1)</i> |
|-------------|--------------|--------------------------|----------------------------|----------|---------------|
| 1.3         | <b>288</b>   | 7.62                     | 1851.6                     | 1.11     | 0.12          |
| 6.4         | <b>288</b>   | 8.21                     | 2319.0                     | 1.39     | 0.55          |
| 11          | <b>288</b>   | 8.62                     | 2685.8                     | 1.61     | 0.99          |
| 18          | <b>288</b>   | 9.12                     | 3173.6                     | 1.90     | 1.72          |
| 32          | <b>288</b>   | 10.72                    | 5160.6                     | 3.10     | 6.50          |

**Table SI 7.** Extracted hydrodynamic radius of **2a** in CD<sub>2</sub>Cl<sub>2</sub> (referenced to TMS) at different concentrations. Aggregation number *N* ( $V/V^0$ ), where  $V^0$  (1666 Å<sup>3</sup>) is the calculated volume of the monomer using the extrapolated radius (7.35 Å).

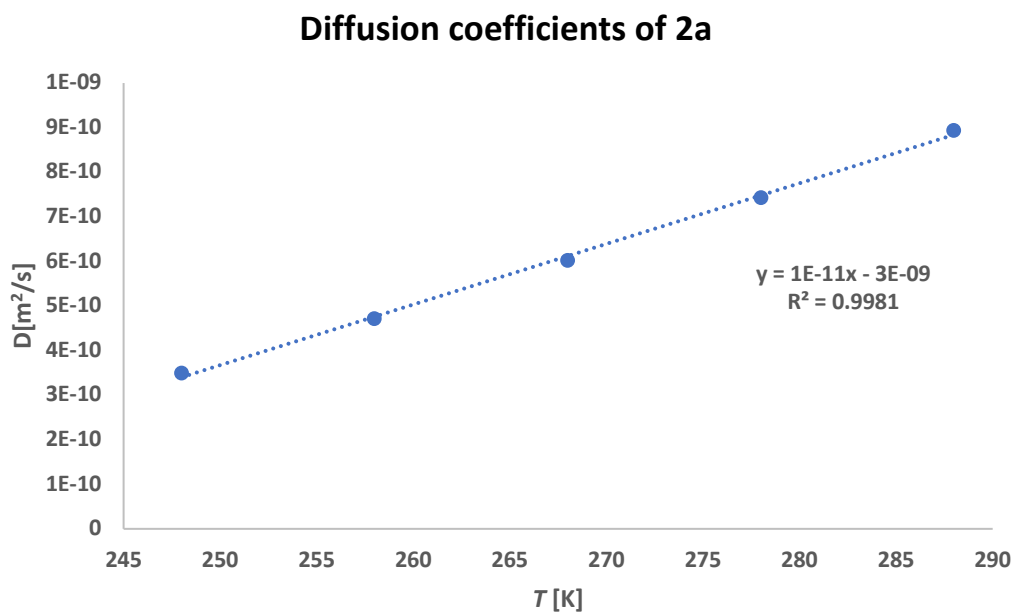

**Figure SI 32.** Diffusion coefficients of **2a** (6.4 mM,  $\text{CD}_2\text{Cl}_2$ ) at different temperatures showing a linear dependence.

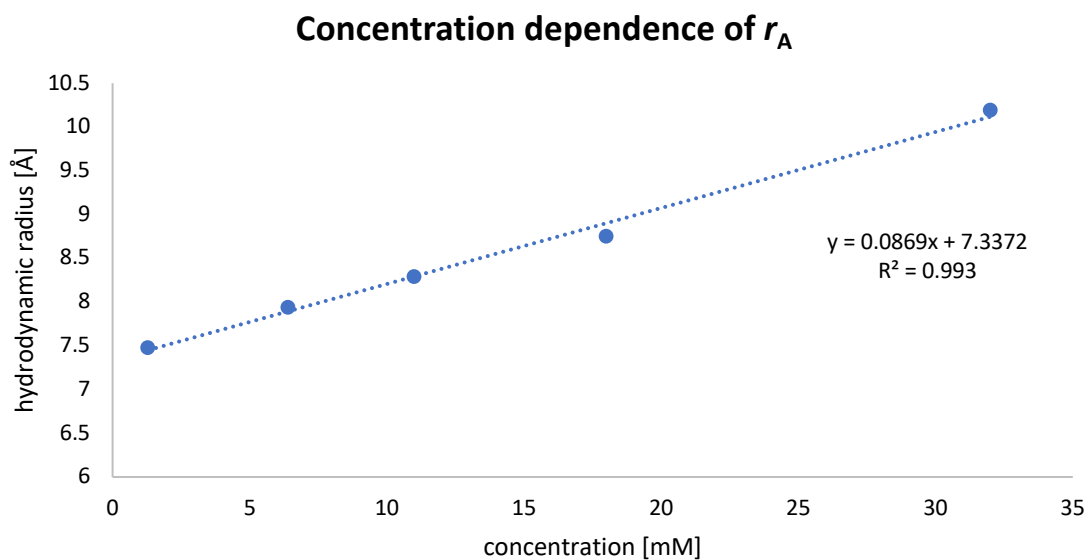

**Figure SI 33.** Concentration dependence of extracted hydrodynamic radii of **2a** in  $\text{CD}_2\text{Cl}_2$  at 288 K.

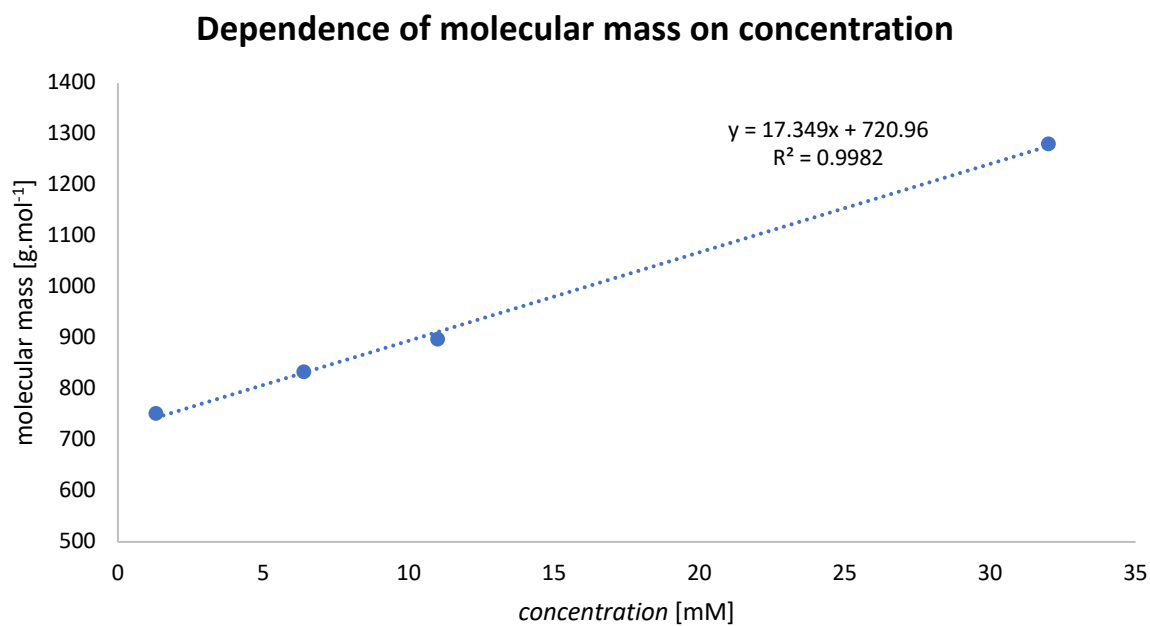

**Figure SI 34.** Concentration dependence of extracted molecular mass of **2a** in CD<sub>2</sub>Cl<sub>2</sub> at 288 K.

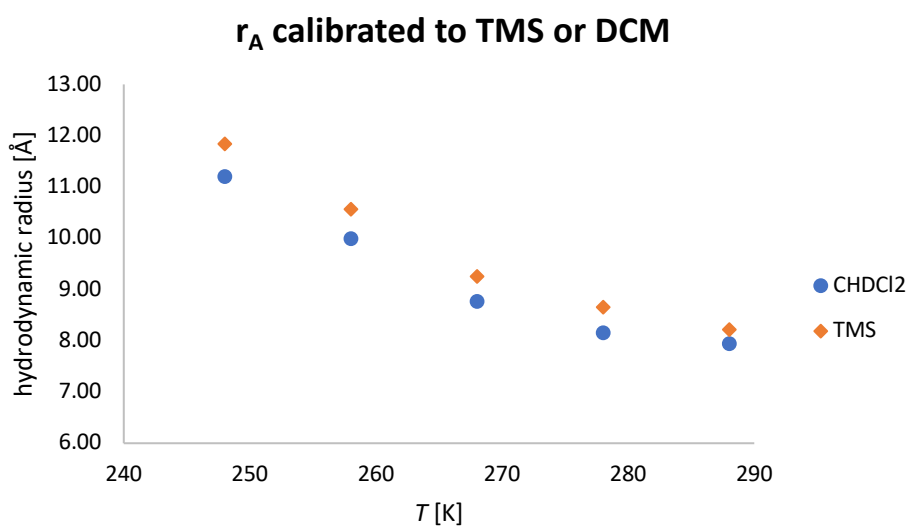

**Figure SI 35.** Dependence of extracted hydrodynamic radii of **2a** on temperature in CD<sub>2</sub>Cl<sub>2</sub> at 6.4 mM concentration.



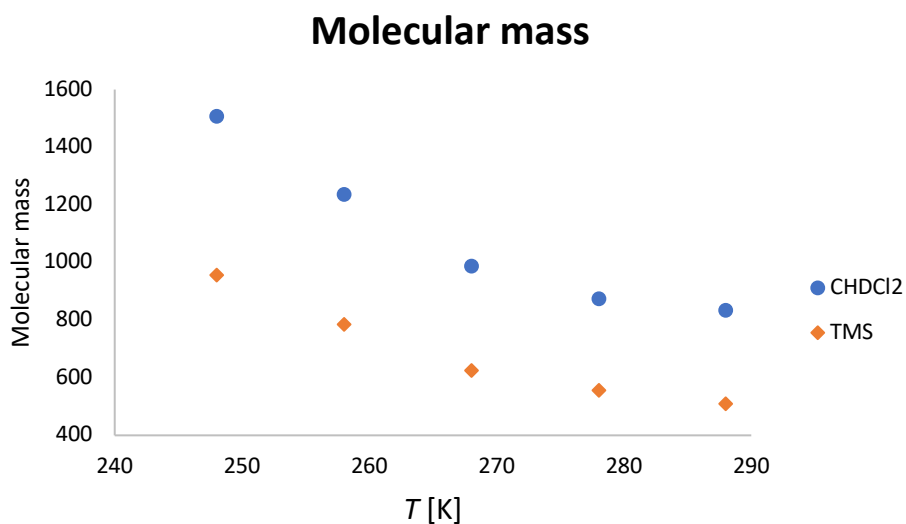

**Figure SI 36.** Dependence of extracted molecular mass of **2a** on temperature in  $\text{CD}_2\text{Cl}_2$  at 6.4 mM concentration.

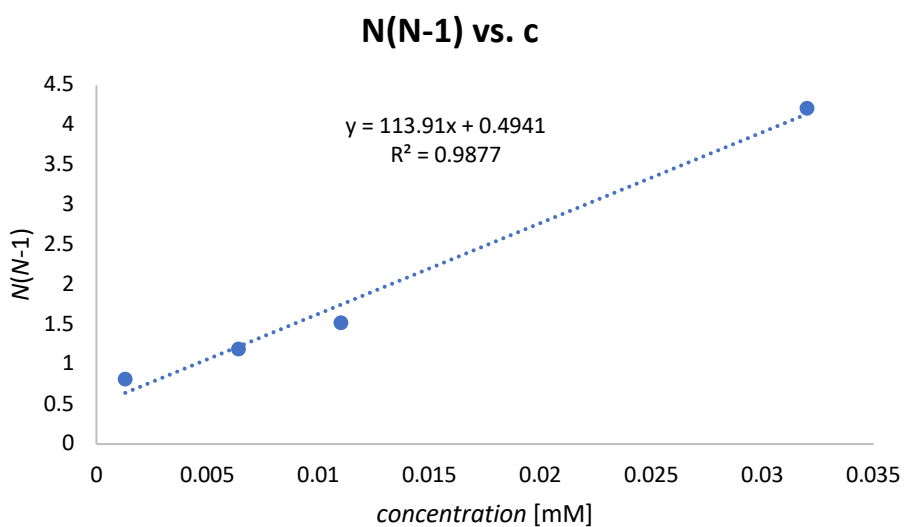

**Figure SI 37.** Extraction of association constant by Equal K model in  $\text{CD}_2\text{Cl}_2$  based on molecular mass, showing a  $K = 114 \text{ M}^{-1}$  (data are presented in Table SI 6).  $N$  is the aggregation number.<sup>6</sup>

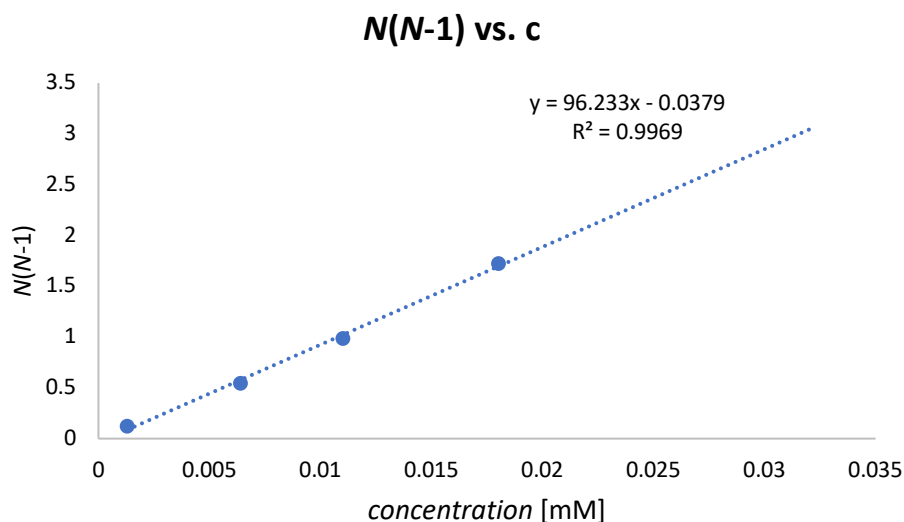

**Figure SI 38.** Extraction of association constant by Equal K model in  $\text{CD}_2\text{Cl}_2$  based on calculated volume, showing a  $K = 96 \text{ M}^{-1}$  (data are presented in **Table SI 7**).  $N$  is the aggregation number.<sup>6</sup>

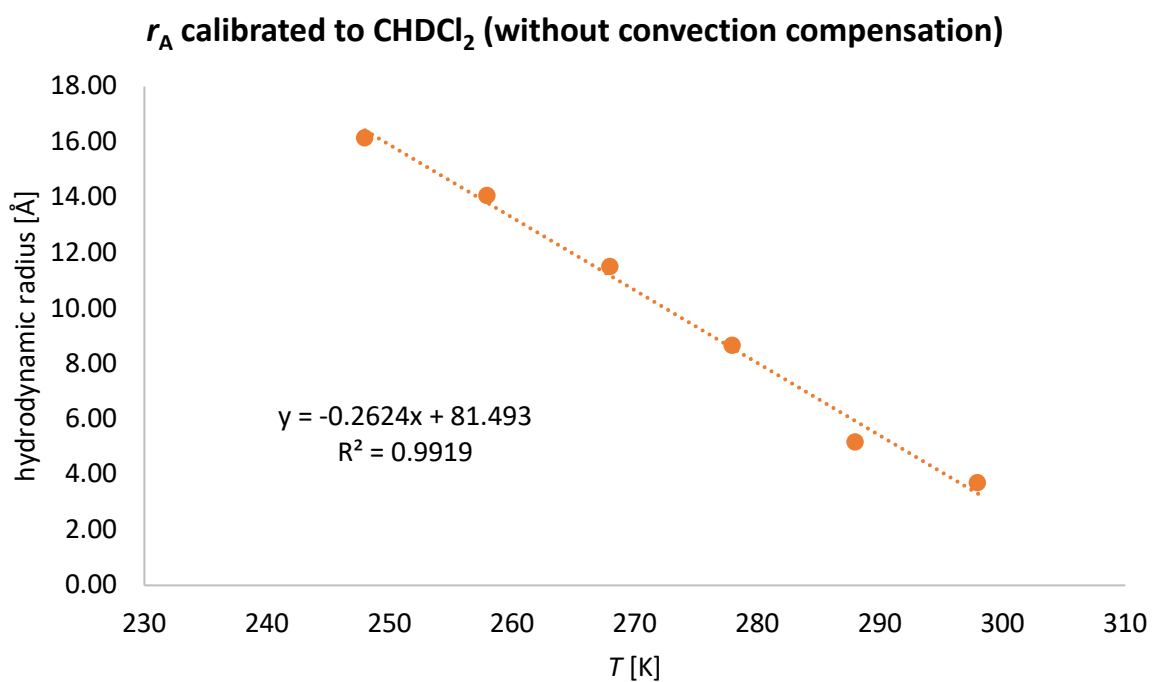

**Figure SI 2.** Initial results using ledbpgp2s pulse sequence without convection compensation. Dependence of extracted hydrodynamic radii of **2a** on temperature in  $\text{CD}_2\text{Cl}_2$  at 32 mM concentration.

| [urea] [mM] | <i>T</i> [K] | D (urea) [m <sup>2</sup> s <sup>-1</sup> ] | D (TMS) [m <sup>2</sup> s <sup>-1</sup> ] | viscosity | MW [g·mol <sup>-1</sup> ] | <i>r<sub>A</sub></i> [Å] |
|-------------|--------------|--------------------------------------------|-------------------------------------------|-----------|---------------------------|--------------------------|
| 25          | 288          | 1.20E-09                                   | 3.19E-09                                  | 3.26E-14  | 474.0                     | 7.87                     |
| 25          | 278          | 1.00E-09                                   | 2.74E-09                                  | 3.66E-14  | 499.3                     | 8.11                     |
| 25          | 268          | 8.51E-10                                   | 2.36E-09                                  | 4.1E-14   | 509.8                     | 8.21                     |
| 25          | 258          | 7.20E-10                                   | 2.01E-09                                  | 4.63E-14  | 515.6                     | 8.26                     |

**Table S18.** Diffusion data for **2a** acetone-*d*<sub>6</sub> for different temperatures.

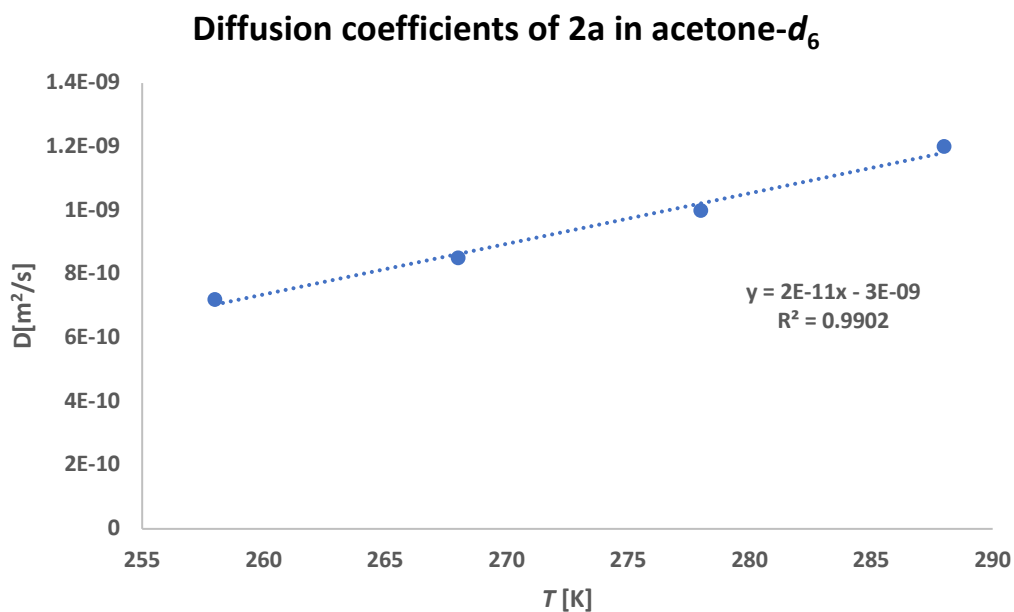

**Figure SI 40.** Dependence of diffusion coefficients of **2a** in acetone-*d*<sub>6</sub> on temperature.

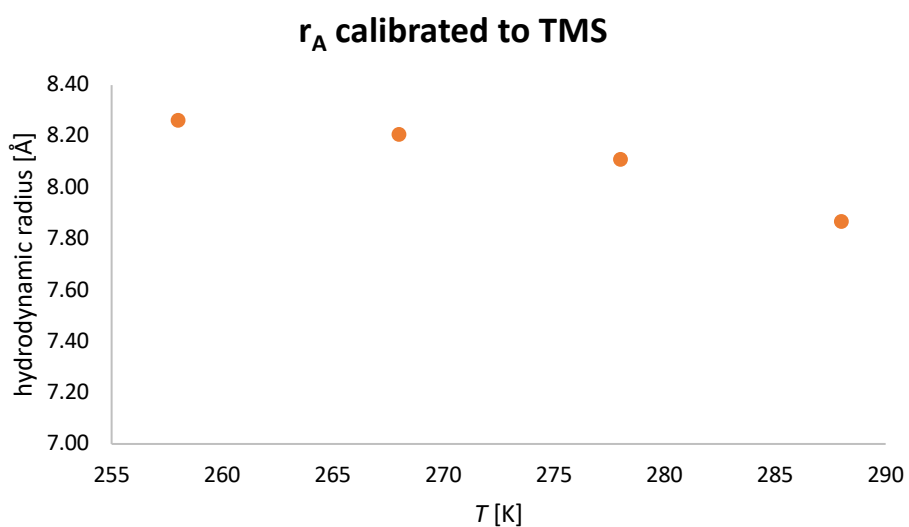

**Figure SI 41.** Temperature dependence of extracted hydrodynamic radius of **2a** in acetone-*d*<sub>6</sub>.

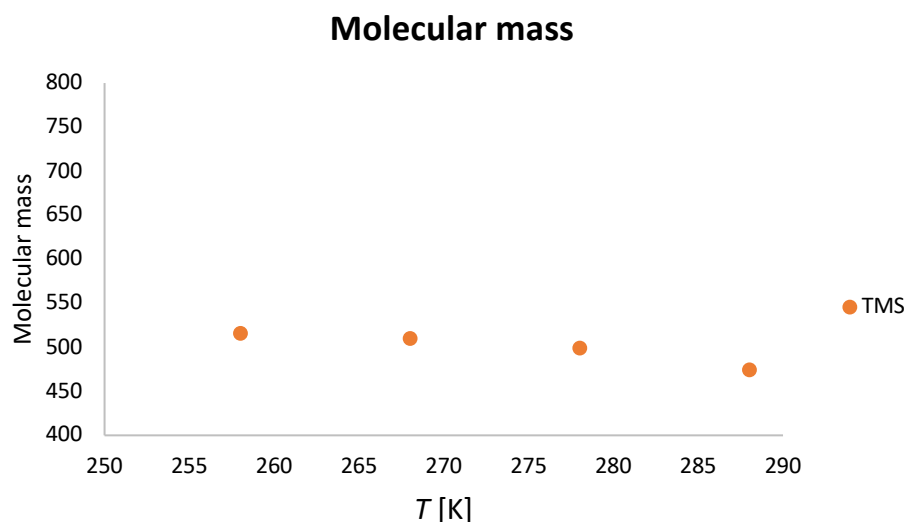

**Figure SI 42.** Temperature dependence of extracted molecular mass of **2a** in acetone- $d_6$  at different temperatures. Only a constant mass corresponding to monomeric urea was observed.

| [urea] [mM] | $T$ [K]    | D (urea) [ $m^2s^{-1}$ ] | D (TMS) [ $m^2s^{-1}$ ] | viscosity | MW [g·mol $^{-1}$ ] | $r_A$ [Å] | D (CH $2$ Cl $_2$ ) [ $m^2s^{-1}$ ] | viscosity | MW [g·mol $^{-1}$ ] | $r_A$ [Å] |
|-------------|------------|--------------------------|-------------------------|-----------|---------------------|-----------|-------------------------------------|-----------|---------------------|-----------|
| 52          | <b>288</b> | 8.05E-10                 | 2.57E-09                | 4.05E-14  | 649.5               | 9.45      | 3.03E-09                            | 3.03E-09  | 840.0               | 7.97      |
| 52          | <b>278</b> | 6.16E-10                 | 2.14E-09                | 4.69E-14  | 751.1               | 10.28     | 2.52E-09                            | 2.52E-09  | 969.3               | 8.67      |
| 52          | <b>268</b> | 4.73E-10                 | 1.84E-09                | 5.26E-14  | 912.4               | 11.51     | 2.18E-09                            | 2.18E-09  | 1190.0              | 9.76      |
| 52          | <b>258</b> | 3.85E-10                 | 1.67E-09                | 5.58E-14  | 1100.4              | 12.84     | 2.03E-09                            | 2.03E-09  | 1499.8              | 11.17     |
| 52          | <b>248</b> | 2.89E-10                 | 1.43E-09                | 6.26E-14  | 1380.1              | 14.65     | 1.79E-09                            | 1.79E-09  | 1978.4              | 13.12     |

**Table SI 9.** Diffusion data for **2b** in CD $_2$ Cl $_2$  for different temperatures.

| [urea] [mM] | $T$ [K]    | $r_A$ [Å] | $V$ [Å $^3$ ] | $N$  |
|-------------|------------|-----------|---------------|------|
| 52          | <b>288</b> | 7.97      | 2123.8        | 1.00 |
| 52          | <b>278</b> | 8.67      | 2726.6        | 1.28 |
| 52          | <b>268</b> | 9.76      | 3899.0        | 1.84 |
| 52          | <b>258</b> | 11.17     | 5838.2        | 2.75 |
| 52          | <b>248</b> | 13.12     | 9463.1        | 4.46 |

**Table SI 10.** Aggregation of **2b** in CD $_2$ Cl $_2$  at different temperatures. Estimation of the aggregation number on the assumption that monomer is predominant at 288 K.

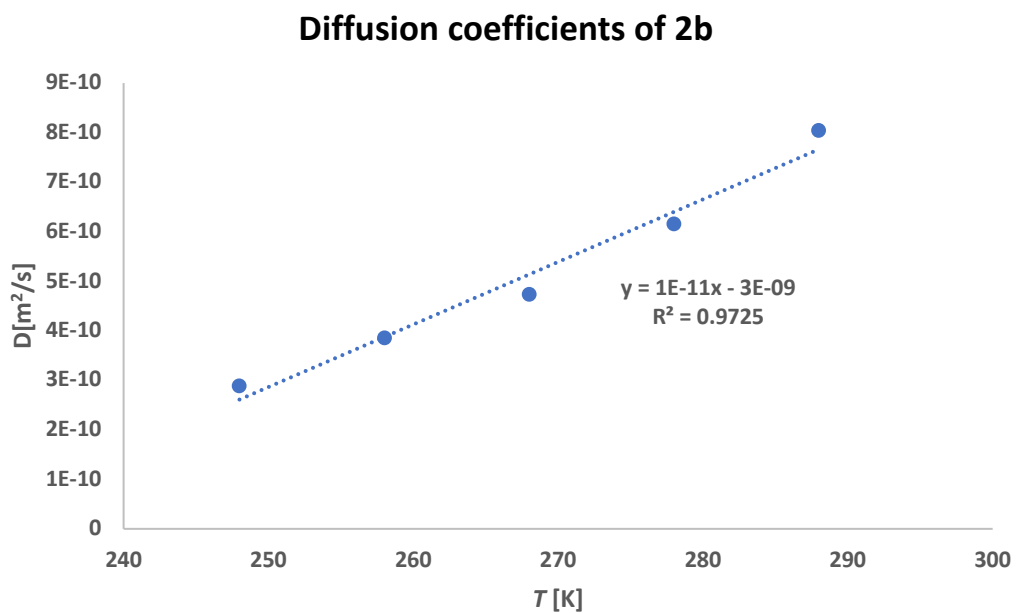

**Figure SI 43.** Dependence of diffusion coefficients of **2b** on temperature in CD<sub>2</sub>Cl<sub>2</sub>.

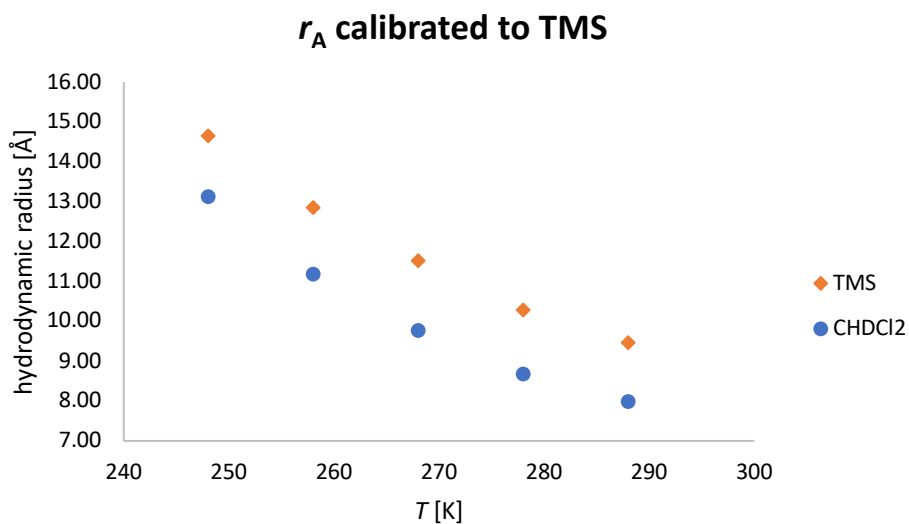

**Figure SI 44.** Dependence of extracted hydrodynamic radius of **2b** on temperature in CD<sub>2</sub>Cl<sub>2</sub>.

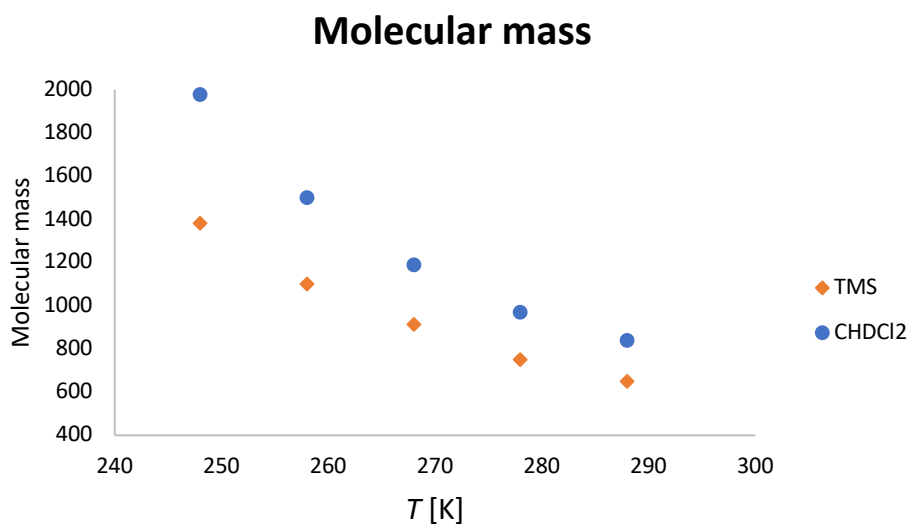

**Figure SI 45.** Dependence of extracted molecular mass of **2b** on temperature in  $\text{CD}_2\text{Cl}_2$ .

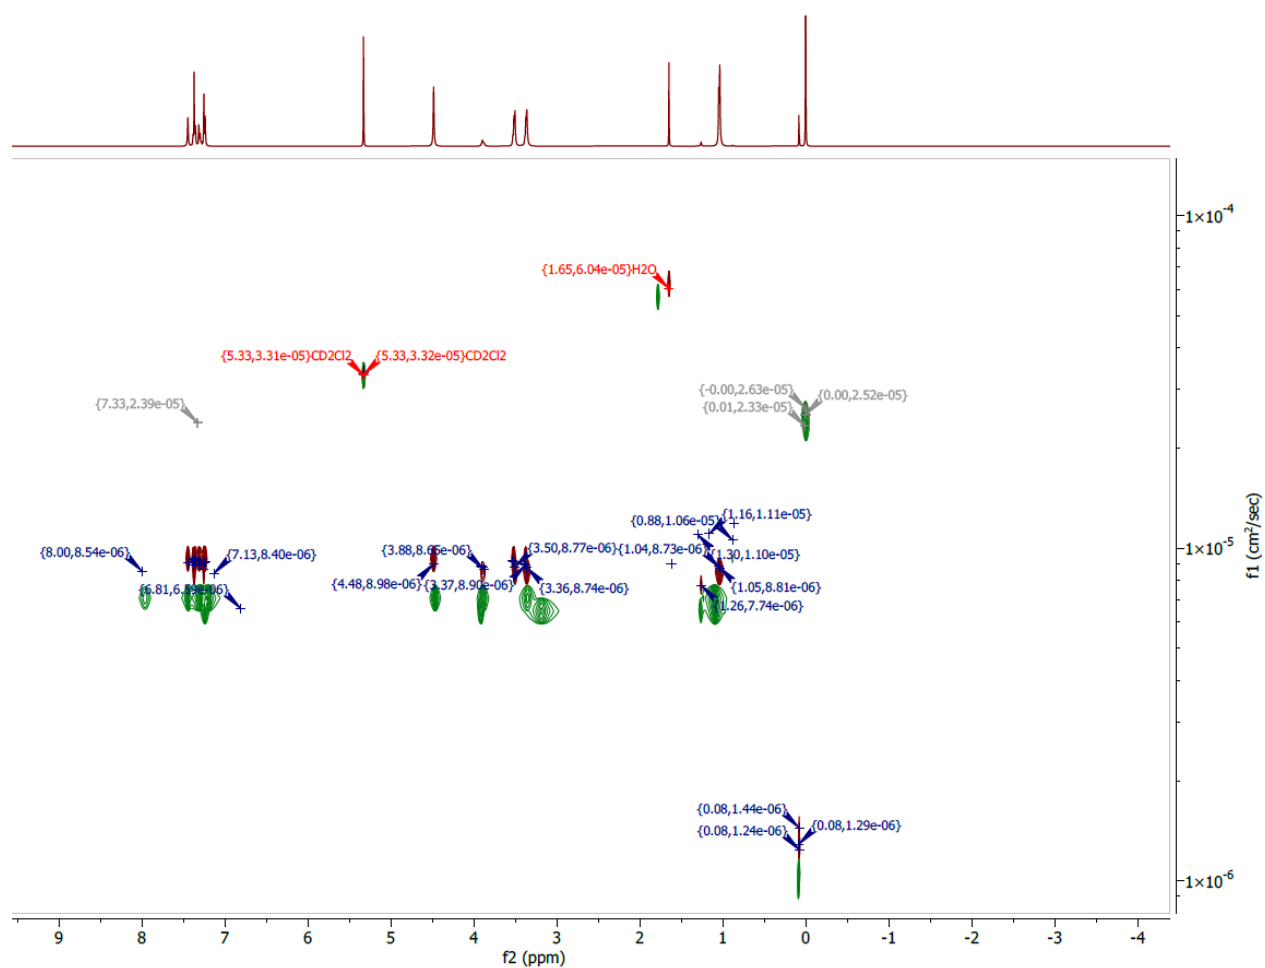

**Figure SI 46.** Overlaid 2D DOSY spectra of **2a** in  $\text{CD}_2\text{Cl}_2$  at 32mM concentration (maroon) and 6.4 mM (green).

## 7. Computational studies

### Geometry Optimization

Density functional theory (DFT) calculations were performed with Gaussian 16.<sup>7</sup> The geometries were optimized using the hybrid B3LYP functional<sup>8,9</sup> with D3(BJ) dispersion correction<sup>10</sup> and the split-valence plus polarization def2-SVP basis set.<sup>11</sup> All DFT calculations were conducted with the *ultrafine* integration grid. Frequency calculations were performed at the same level of theory as for geometry optimizations to verify the stationary points as minima (no imaginary frequencies) as well as to obtain thermal Gibbs free energy corrections at 298 K. Thermochemical free energy corrections were then recomputed at 298 K and concentration 1.0 mol.L<sup>-1</sup> using the GoodVibes software package with Grimme's entropy corrections using quasi-rigid rotor harmonic approximation (qRRHO)<sup>12</sup> applied to all frequencies below 100 cm<sup>-1</sup>.<sup>13</sup>

The hydrogen atom positions in the nanoring crystal structure were refined by B97-3c/def2-mTZVP<sup>14</sup> in ORCA 4.2.0 computational software.<sup>15</sup>

### Single-Point Calculations

To refine the computed energy, single point calculations were performed in Gaussian 16 at B3LYP-D3(BJ)/def2-TZVPP/SMD(CH<sub>2</sub>Cl<sub>2</sub>) level of theory. SMD implicit solvation model for dichloromethane was used.<sup>16</sup>

#### *HFLD*

Hartree-Fock London Dispersion calculations<sup>17</sup> were conducted in Orca 4.2.0 with def2-TZVP basis, Rijcosx approximation, and NormalPNO settings ( $T_{\text{CutPNO}} 3.3 \times 10^{-7}$ ).  $T_{\text{CutPairs}}$  was set to  $10^{-5}$ .

#### *DLPNO-CCSD(T) Calculations*

The DLPNO-CCSD(T) single-point energy calculations<sup>18,19</sup> were conducted in Orca 4.2.0 with def2-TZVP basis set, Rijcosx approximation, and LoosePNO ( $T_{\text{CutPNO}} 1 \times 10^{-6}$ ) settings.

The T1 diagnostics value was <0.02 in all cases. Local energy decomposition of total and interaction energy was performed according to Bistoni et al.<sup>20,21</sup> Triples corrections were added to the dispersive and non-dispersive components of the correlation energy.

### Gibbs Free Energies

The  $\Delta G$  value is obtained by adding the corresponding free energy corrections at temperature  $T$  calculated at the B3LYP-D3(BJ)/def2-SVP level, to  $\Delta E$ , calculated at the single-point calculation at B3LYP-D3(BJ)/def2-TZVPP/SMD(CH<sub>2</sub>Cl<sub>2</sub>) level with SMD solvation correction.  $G_{\text{sol}}^0 = +1.89 \text{ kcal}\cdot\text{mol}^{-1}$  is added for each compound in the dimerization equilibrium to capture the stoichiometric effect (two molecules of reactant and one molecule of product).

## Computed Energies

### Monomer conformations

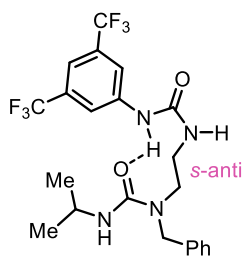

**2a**  
conf 1  
73.1 %

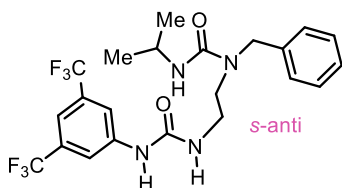

**2a**  
conf 2  
26.8 %

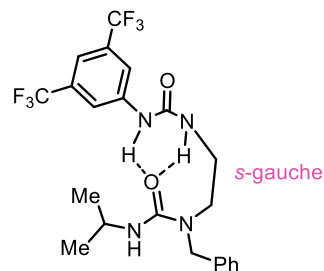

**2a**  
conf 3  
0.1 %

### Dimer conformations

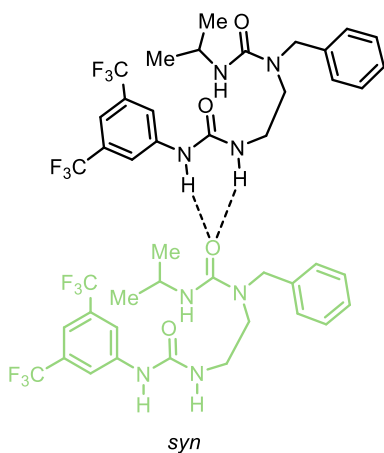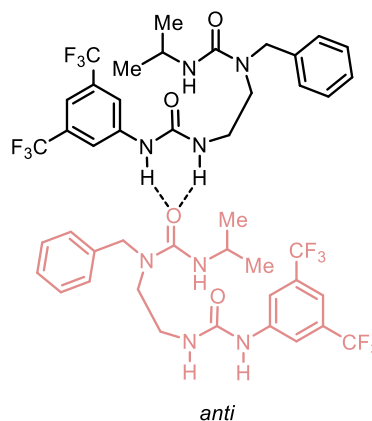

**Figure SI 47.** Conformations of monomer and dimer of **2a**.

| Compound              | B3LYP/SVP    | $G_{\text{corr}}$ | B3LYP/TZVPP/SMD | $\Delta G_{\text{corr}}$ | $\Delta G_{\text{solv}}$<br>[kJ·mol <sup>-1</sup> ] |
|-----------------------|--------------|-------------------|-----------------|--------------------------|-----------------------------------------------------|
| <i>Monomer_conf1</i>  | -1820.190302 | 0.394113          | -1822.30344     | -1821.909324             | 0.00                                                |
| <i>Monomer_conf2</i>  | -1820.184624 | 0.392742          | -1822.30112     | -1821.908376             | 2.49                                                |
| <i>Monomer_conf3</i>  | -1820.197741 | 0.398004          | -1822.30081     | -1821.902808             | 17.11                                               |
| <i>syn-dimer</i>      | -3640.418776 | 0.812674          | -3644.62946     | -3643.816786             | 0.00                                                |
| <i>anti-dimer</i>     | -3640.423258 | 0.815768          | -3644.62560     | -3643.811142             | 14.82                                               |
| <i>syn-dimer (2b)</i> | -3718.999395 | 0.867004          |                 |                          |                                                     |

**Table SI 1.** Computed Gibbs free energies (DCM, 298 K, 1 M) of **2a** based on B3LYP-D3(BJ)/def2-TZVPP/SMD(dichloromethane) single point calculations.



Gibbs free energies of the dimerization process were computed as follows:

$$\Delta G_{solv} = \Delta G_{solv}(dimer) - 2 * \Delta G_{solv}(monomer) - \Delta G_{solv}^0$$

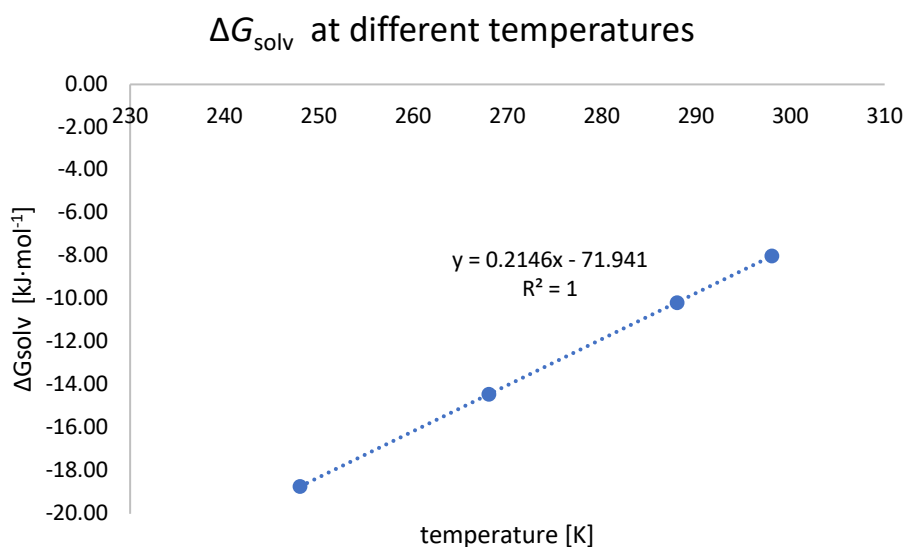

**Figure SI 48.** Computed Gibbs free energies (DCM, 1 M) of the dimerization process in the temperature range 298 – 248 K based on *monomer\_conf2*, showing increasing association with decreasing temperature.

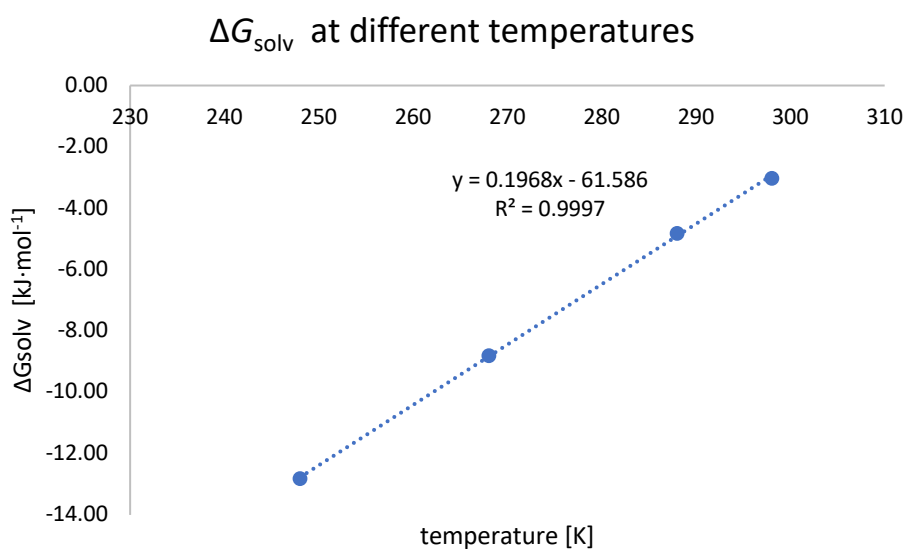

**Figure SI 49.** Computed Gibbs free energies (DCM, 1 M) of the dimerization process in the temperature range 298 – 248 K based on *monomer\_conf1*, showing increasing association with decreasing temperature.

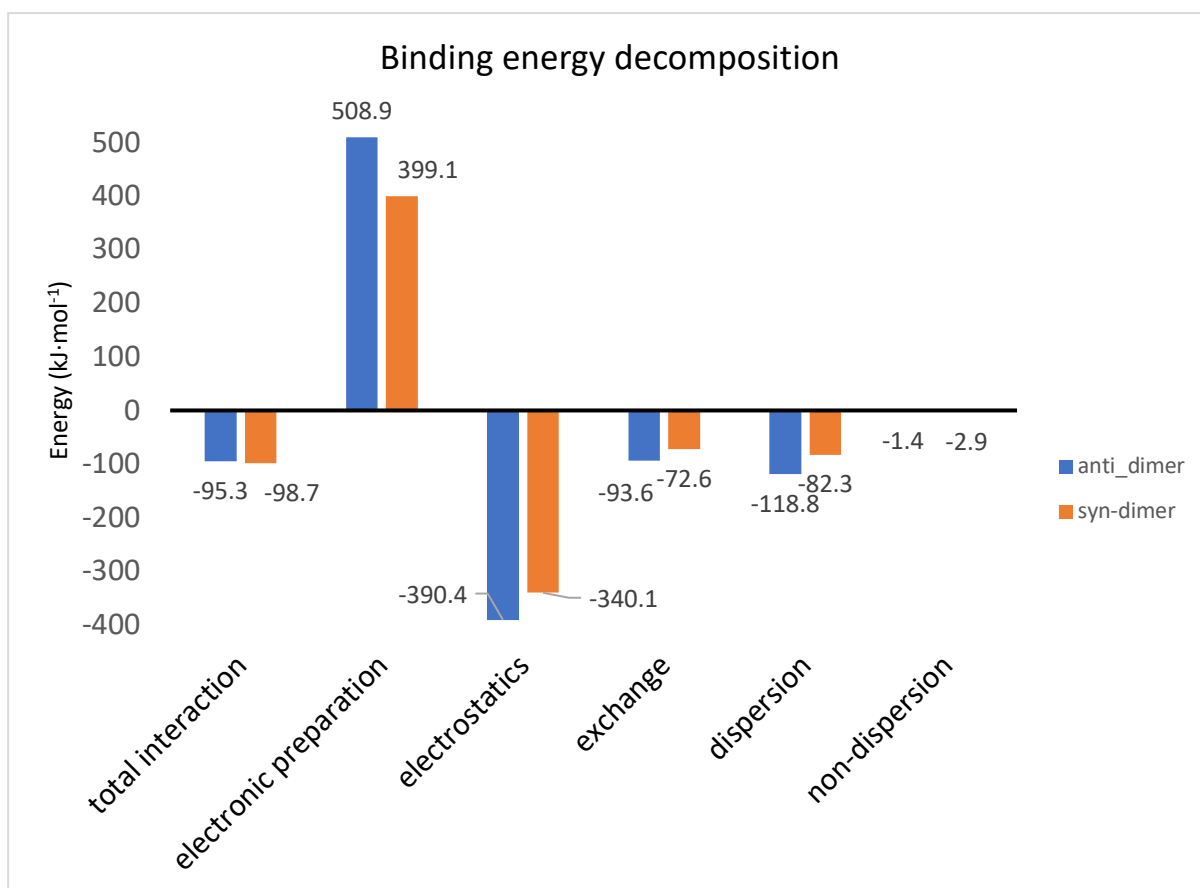

**Figure SI 50.** Decomposition of the binding energy of **2a** dimers at DLPNO-CCSD(T)/def2-TZVP/LoosePNO calculations (energies in kJ·mol<sup>-1</sup>). The *syn*-dimer has slightly higher interaction energy despite weaker interactions than the *anti*-dimer.

| structure                    | dispersion interaction [kJ·mol <sup>-1</sup> ] |
|------------------------------|------------------------------------------------|
| <i>syn</i> -dimer <b>2a</b>  | -75.2                                          |
| <i>syn</i> -dimer <b>2b</b>  | -86.1                                          |
| <i>anti</i> -dimer <b>2a</b> | -109.5                                         |

**Table SI 12.** Computed dispersion interactions between monomers in the dimer structures based on HFLD/def2-TZVP/NormalPNO/TCutPairs(1x10<sup>-5</sup>) calculations. In agreement with the CCSD(T) calculations, the *anti*-dimer has stronger dispersion interaction between the monomers. The change of an *i*-Pr group to a *t*-Bu group slightly increased the interaction in the *syn*-dimer.

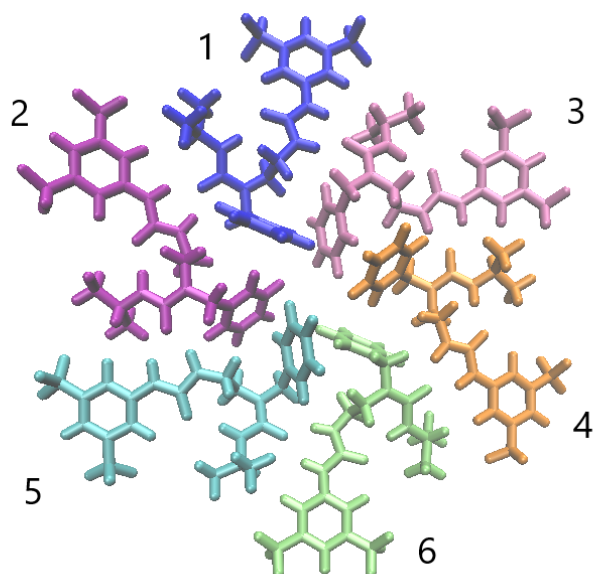

| Pair | Dispersion interaction | [kJ·mol <sup>-1</sup> ] |
|------|------------------------|-------------------------|
| 2,1  | -0.007893              | -20.72                  |
| 3,1  | -0.008421              | -22.11                  |
| 3,2  | 0.000000               | 0.00                    |
| 4,1  | -0.000071              | -0.19                   |
| 4,2  | 0.000000               | 0.00                    |
| 4,3  | -0.008076              | -21.20                  |
| 5,1  | -0.000071              | -0.19                   |
| 5,2  | -0.007873              | -20.67                  |
| 5,3  | 0.000000               | 0.00                    |
| 5,4  | -0.000071              | -0.19                   |
| 6,1  | 0.000000               | 0.00                    |
| 6,2  | -0.000071              | -0.19                   |
| 6,3  | -0.000071              | -0.19                   |
| 6,4  | -0.007871              | -20.66                  |
| 6,5  | -0.007868              | -20.66                  |

**Table SI 13.** Computed dispersion interactions between monomers **2a** in the cyclic hexamer structure based on HFLD/def2-TZVP(-f)/NormalPNO calculation. The energies are apparently lower due to a smaller basis set and looser settings used.

#### Computed NMR Chemical Shifts

NMR chemical shieldings and chemical shifts were calculated in ORCA 4.2.0 using TPSS-D3BJ/pcSseg-3/SMD(CH<sub>2</sub>Cl<sub>2</sub>) level of theory. Chemical shift scaling was done for NH and aromatic protons according to a published procedure.<sup>22</sup>

Calc.  $\delta$  (ppm)

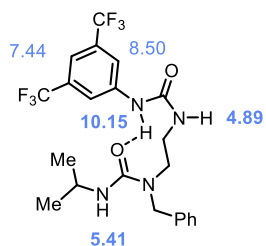

*conf 1*

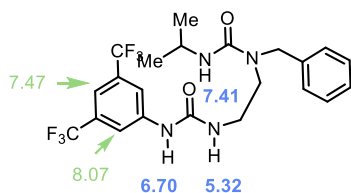

*conf 2*

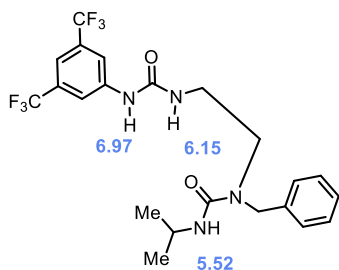

*conf 3*

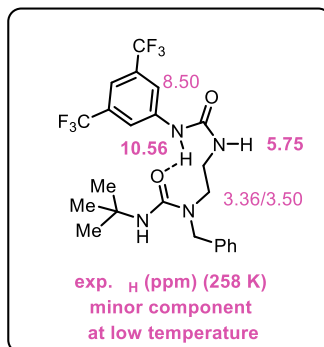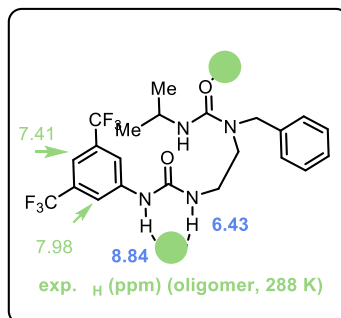

Calc.  $\delta$  (ppm)

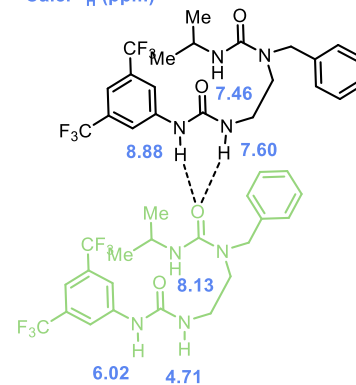

**Figure SI 51.** Computed  $^1\text{H}$  chemical shifts of monomer (left) and dimer (right) conformers of **2a**. Experimental chemical shifts are shown for the minor component **2b** at 258 K (assigned as *conf1*, top inset), as well as major component of **2a** at 288 K (bottom inset).

## Noncovalent Interaction (NCI) Plots

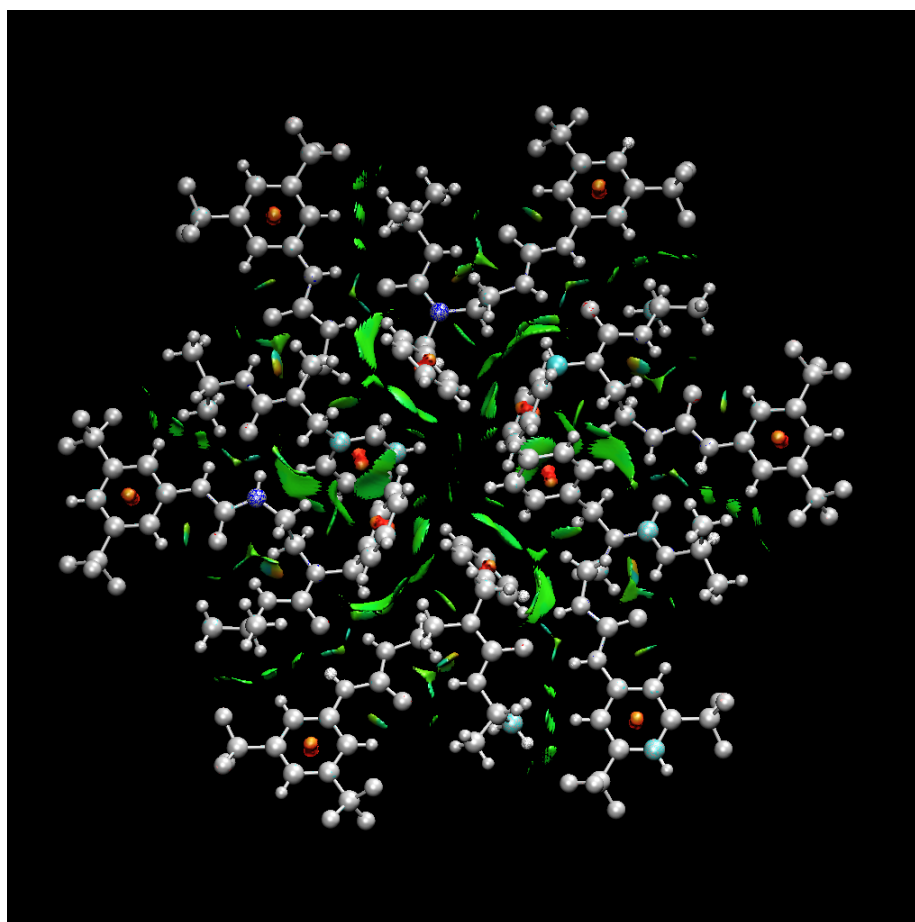

Figure SI 52. Noncovalent interaction plot (NCIPlot)<sup>23, 24</sup> of **2a** hexamer.

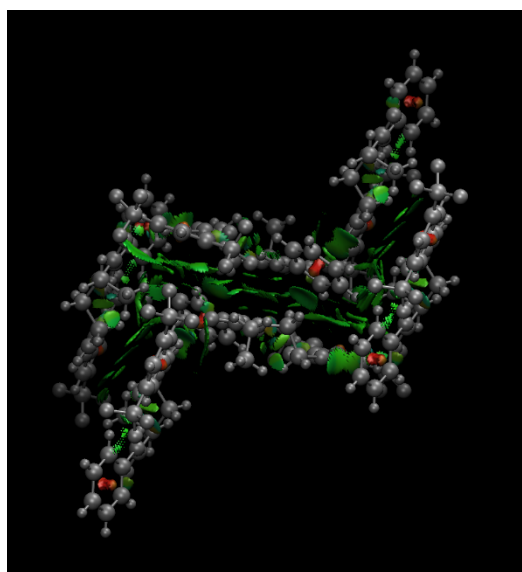

Figure SI 53. Noncovalent interaction plot (NCI) of **4b** polymeric structure (two antiparallel chains).

## Coordinates of Optimized Structures

Method: B3LYP-D3(BJ)/def2-SVP

Monomer\_conf2 2a

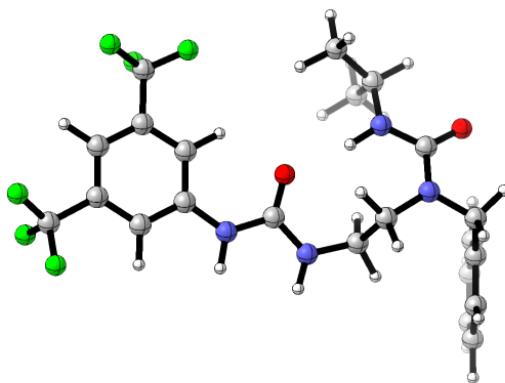

```
F 4.2104590000 2.7463260000 1.5380030000
F 3.0863320000 3.0788820000 -0.2796330000
F 5.2366380000 2.8059750000 -0.3651580000
F 7.0712980000 -1.6976490000 -0.7003440000
F 5.7304760000 -3.4035800000 -0.7024130000
F 6.4170860000 -2.5651830000 1.1691330000
O -4.7726950000 2.3623800000 -0.6107700000
O -0.2004800000 0.2616080000 0.0401970000
N -2.5165580000 2.0284140000 -0.5425540000
H -1.7580460000 1.3503800000 -0.5019760000
N -3.9504320000 0.3664450000 -1.3683620000
N -1.1538160000 -1.7928330000 -0.0789820000
H -1.0327620000 -2.7884080000 -0.2124230000
N 1.1565640000 -1.5940420000 -0.0089790000
H 1.1577320000 -2.6066470000 -0.0223330000
C 3.5438130000 -1.8451860000 -0.0599270000
H 3.4105770000 -2.9263430000 -0.1370630000
C -0.9571390000 3.9024360000 -0.3850920000
H -0.0900770000 3.2482390000 -0.1941050000
H -0.7580220000 4.8704230000 0.1004080000
H -1.0279010000 4.0663780000 -1.4710810000
C -5.9616520000 -0.4580030000 0.8545220000
H -5.8261630000 0.6187520000 0.9826350000
C -2.2469760000 3.2829130000 0.1538890000
H -3.0954670000 3.9430560000 -0.0752460000
C -2.1939830000 3.0635790000 1.6698870000
H -3.1480650000 2.6479340000 2.0285330000
H -2.0100240000 4.0100750000 2.2032040000
H -1.3852620000 2.3599800000 1.9284300000
C -3.7996630000 1.6406650000 -0.8150010000
C -5.3070100000 -0.1315610000 -1.5612440000
H -5.3483930000 -0.6901320000 -2.5107940000
H -5.9527750000 0.7510740000 -1.6474300000
C -5.7743590000 -1.0144170000 -0.4220180000
```

C -5.958000000 -2.391439000 -0.594151000  
 H -5.819669000 -2.831943000 -1.586219000  
 C -6.311928000 -3.207014000 0.486815000  
 H -6.453110000 -4.280545000 0.337196000  
 C -6.485609000 -2.647406000 1.754485000  
 H -6.761429000 -3.280800000 2.601144000  
 C -6.313215000 -1.269354000 1.933569000  
 H -6.458234000 -0.825659000 2.921805000  
 C -2.858632000 -0.576906000 -1.447606000  
 H -1.965980000 -0.073184000 -1.847947000  
 H -3.125185000 -1.357253000 -2.178054000  
 C -2.496351000 -1.231396000 -0.093073000  
 H -2.564131000 -0.469078000 0.695873000  
 H -3.210048000 -2.024936000 0.162765000  
 C -0.075253000 -0.958236000 -0.015553000  
 C 2.424848000 -0.999594000 0.014080000  
 C 2.624369000 0.388517000 0.098657000  
 H 1.765326000 1.049330000 0.153167000  
 C 3.922345000 0.898865000 0.101649000  
 C 5.038351000 0.064117000 0.023388000  
 H 6.045769000 0.478430000 0.009549000  
 C 4.833082000 -1.314929000 -0.051573000  
 C 4.113524000 2.390497000 0.244058000  
 C 6.018742000 -2.247790000 -0.076367000

Monomer\_conf1 **2a** (*E,Z*-aryl urea)

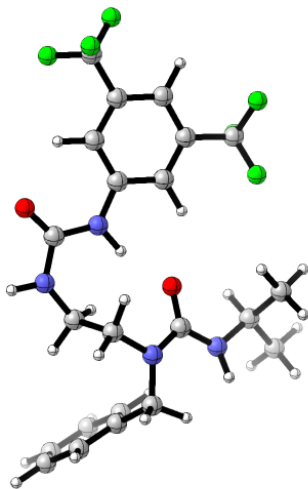

F -5.844762000 -2.206883000 1.160320000  
 F -5.409721000 -2.960046000 -0.818128000  
 F -6.615638000 -1.174522000 -0.577796000  
 F -4.407653000 3.157061000 0.287348000  
 F -3.291237000 3.065173000 -1.561556000  
 F -2.240288000 3.257481000 0.317987000  
 O 1.118730000 0.872946000 0.273471000  
 O -1.049159000 -3.651334000 0.189046000  
 N 2.856209000 2.315766000 0.432459000  
 H 3.674290000 2.569745000 0.971889000  
 N 3.012682000 0.116411000 1.276936000  
 N 1.111515000 -2.962735000 0.239548000

H 1.3343430000 -3.9463510000 0.3228590000  
N -0.5920740000 -1.3955890000 0.0219490000  
H 0.1410050000 -0.6809860000 0.0593560000  
C -1.9816390000 0.5422110000 -0.1001260000  
H -1.0718930000 1.1411250000 -0.0770240000  
C 3.0305870000 4.4565240000 -0.7115500000  
H 3.6732000000 4.8949170000 0.0720680000  
H 2.4696850000 5.2817370000 -1.1743510000  
H 3.6797660000 4.0057950000 -1.4778110000  
C 5.0961380000 -0.1202290000 -1.0040340000  
H 4.5341380000 0.7934850000 -1.2126740000  
C 2.0720290000 3.4256040000 -0.1219570000  
H 1.4674850000 2.9884030000 -0.9303110000  
C 1.1190890000 4.0308740000 0.9116890000  
H 0.4400270000 3.2630770000 1.3071090000  
H 0.5014000000 4.8189510000 0.4541200000  
H 1.6808270000 4.4774810000 1.7496030000  
C 2.2758820000 1.0971230000 0.6486360000  
C 4.4636080000 0.1413190000 1.4312760000  
H 4.7146130000 -0.3188640000 2.3996170000  
H 4.8137870000 1.1808920000 1.4940390000  
C 5.1907600000 -0.5855340000 0.3168070000  
C 5.9092770000 -1.7581710000 0.5745490000  
H 5.9847430000 -2.1301980000 1.6003010000  
C 6.5229210000 -2.4611250000 -0.4677100000  
H 7.0789650000 -3.3768240000 -0.2532920000  
C 6.4198690000 -1.9943560000 -1.7796140000  
H 6.8949230000 -2.5431450000 -2.5960060000  
C 5.7065730000 -0.8196780000 -2.0450520000  
H 5.6257940000 -0.4491620000 -3.0696660000  
C 2.3424740000 -1.1677540000 1.4578220000  
H 1.3470930000 -0.9804840000 1.8822240000  
H 2.9087730000 -1.7459730000 2.2027300000  
C 2.1765640000 -1.9885780000 0.1555890000  
H 1.9934810000 -1.2920810000 -0.6775850000  
H 3.1100440000 -2.5141170000 -0.0867870000  
C -0.2479950000 -2.7303780000 0.1510210000  
C -1.8797960000 -0.8622750000 -0.0513670000  
C -3.0562730000 -1.6302250000 -0.0766180000  
H -2.9837240000 -2.7142880000 -0.0432880000  
C -4.2962430000 -0.9871630000 -0.1398110000  
C -4.4034800000 0.4033120000 -0.1845580000  
H -5.3783630000 0.8862670000 -0.2317580000  
C -3.2267970000 1.1586440000 -0.1656510000  
C -5.5440800000 -1.8332360000 -0.0990330000  
C -3.2937360000 2.6591470000 -0.2761960000



Monomer\_conf3 2a

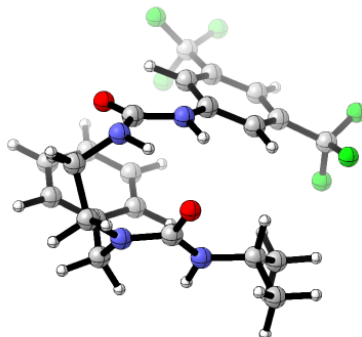

```
F -3.4489860000 -3.1804480000 0.9261470000
F -3.3702510000 -2.5535930000 -1.1431250000
F -4.9741340000 -1.8599780000 0.1319390000
F -2.7697500000 2.9903250000 -1.2945630000
F -2.1652840000 3.7764550000 0.6289030000
F -4.1849960000 3.0378600000 0.3382910000
O 3.0469140000 1.5419290000 1.3330450000
O 0.9587410000 -2.3964140000 1.4330370000
N 2.4035730000 1.8869000000 -0.8103370000
H 2.5534050000 1.6682740000 -1.7858380000
N 3.6535370000 -0.0147840000 -0.2387540000
N 2.6153010000 -1.0648310000 2.2945800000
H 2.8120960000 -0.0819430000 2.4790710000
N 0.5361260000 -0.1678020000 1.8727830000
H 1.0430030000 0.7066230000 1.9893460000
C -1.2020430000 1.2446200000 1.0234680000
H -0.5688380000 2.1085810000 1.2264540000
C 0.6025730000 3.3786730000 -1.4941520000
H 0.9813060000 3.4878150000 -2.5252110000
H 0.0471520000 4.2939710000 -1.2449870000
H -0.1075190000 2.5396220000 -1.4750270000
C 0.9070180000 -0.9100030000 -1.8132450000
H 0.8089250000 0.1730520000 -1.8889510000
C 1.7490960000 3.1596350000 -0.5107700000
H 1.3423910000 3.0542380000 0.5057120000
C 2.7475350000 4.3193860000 -0.4941280000
H 3.5394210000 4.1262930000 0.2439300000
H 2.2457150000 5.2623380000 -0.2258550000
H 3.2123060000 4.4506260000 -1.4856820000
C 3.0420550000 1.1593200000 0.1527950000
C 3.4260110000 -0.6425500000 -1.5440000000
H 4.3043810000 -1.2699840000 -1.7519440000
H 3.4301400000 0.1277760000 -2.3324150000
C 2.1728250000 -1.4921160000 -1.6431360000
C 2.2615280000 -2.8860940000 -1.5426280000
H 3.2412090000 -3.3558370000 -1.4160230000
C 1.1154730000 -3.6818930000 -1.5917610000
H 1.2031090000 -4.7662660000 -1.4943150000
```

C -0.1386250000 -3.0920350000 -1.7527930000  
H -1.0418970000 -3.7044940000 -1.7777410000  
C -0.2384710000 -1.7037590000 -1.8705100000  
H -1.2172110000 -1.2393950000 -1.9980870000  
C 4.4792850000 -0.7234910000 0.7381620000  
H 4.9589560000 0.0349660000 1.3740250000  
H 5.2794020000 -1.2490150000 0.1927650000  
C 3.7287590000 -1.7232610000 1.6371740000  
H 3.3257000000 -2.5698670000 1.0648600000  
H 4.4449300000 -2.1309030000 2.3720370000  
C 1.3405960000 -1.3124320000 1.8335980000  
C -0.7391040000 -0.0467010000 1.3322760000  
C -1.5722980000 -1.1471280000 1.0662130000  
H -1.2141060000 -2.1493420000 1.2822220000  
C -2.8248550000 -0.9382750000 0.4884000000  
C -3.2857020000 0.3410460000 0.1709230000  
H -4.2690440000 0.4856840000 -0.2756610000  
C -2.4550970000 1.4309190000 0.4455880000  
C -3.6597290000 -2.1362140000 0.1134550000  
C -2.8967150000 2.8125390000 0.0388080000

## Syn-dimer 2a

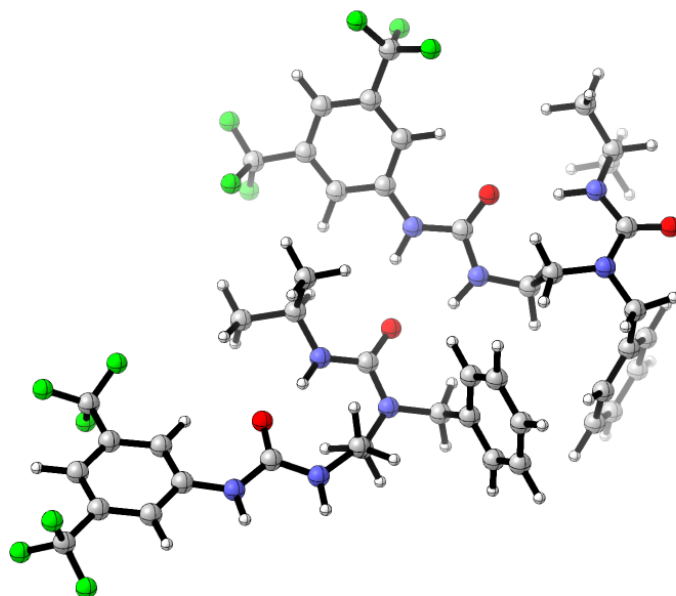

```
F -5.1771570000 6.5138780000 -0.5458890000
F -5.1052080000 5.0956670000 -2.1778850000
F -3.8009880000 6.8283790000 -2.1832880000
F 0.0225000000 7.0250120000 0.9536960000
F 1.1107150000 5.2629760000 0.3156080000
F 0.3171870000 5.3675260000 2.3219990000
O -8.2997990000 -2.3933200000 -1.0688200000
O -4.7439970000 1.1691830000 -0.2137650000
N -7.1347890000 -0.4318580000 -1.0128310000
H -6.2401330000 0.0298990000 -0.8480090000
N -6.0219280000 -2.4733480000 -1.2873950000
N -3.3926210000 -0.5093680000 0.5340920000
H -2.4959020000 -0.7239830000 0.9702520000
N -2.6214580000 1.6487890000 0.5649730000
H -1.8050780000 1.2049020000 0.9929960000
C -1.4230480000 3.6975970000 0.8320810000
H -0.6958360000 3.1612180000 1.4403870000
C -8.1755450000 1.7493420000 -1.3257400000
H -7.2907190000 2.2799810000 -0.9371590000
H -9.0620320000 2.3663520000 -1.1118370000
H -8.0678120000 1.6605940000 -2.4175320000
C -6.6102060000 -4.3317340000 1.1569340000
H -7.5699520000 -3.8463440000 0.9630630000
C -8.3070830000 0.3703250000 -0.6797110000
H -9.1718680000 -0.1583250000 -1.1062620000
C -8.4953300000 0.4602500000 0.8390720000
H -8.6078100000 -0.5471900000 1.2675750000
H -9.3933780000 1.0451980000 1.0959660000
H -7.6223610000 0.9467010000 1.3052940000
C -7.2272750000 -1.7925390000 -1.1116010000
C -6.0546390000 -3.9300590000 -1.2723230000
H -5.3434070000 -4.3088710000 -2.0248920000
H -7.0693770000 -4.2233750000 -1.5681110000
C -5.7142120000 -4.5033290000 0.0885100000
C -4.4812100000 -5.1207400000 0.3293270000
H -3.7717990000 -5.2488500000 -0.4914910000
C -4.1397340000 -5.5538960000 1.6150580000
H -3.1719010000 -6.0311620000 1.7855950000
```

C -5.0317650000 -5.3724670000 2.6741990000  
H -4.7672540000 -5.7079460000 3.6801800000  
C -6.2703870000 -4.7626680000 2.4396560000  
H -6.9745060000 -4.6233230000 3.2639020000  
C -4.7427330000 -1.8251630000 -1.0953420000  
H -4.7139090000 -0.8842770000 -1.6635750000  
H -3.9631880000 -2.4710870000 -1.5225380000  
C -4.4125970000 -1.5261160000 0.3850840000  
H -5.3369330000 -1.2087760000 0.8929630000  
H -4.0651280000 -2.4368170000 0.8889060000  
C -3.6702230000 0.7948970000 0.2603030000  
C -2.5393940000 3.0152030000 0.3236880000  
C -3.4903330000 3.7409060000 -0.4205530000  
H -4.3655080000 3.2281940000 -0.8086330000  
C -3.2914470000 5.1006880000 -0.6545850000  
C -2.1577240000 5.7727610000 -0.1849410000  
H -2.0051820000 6.8300830000 -0.3963350000  
C -1.2273120000 5.0508320000 0.5617720000  
C -4.3474730000 5.8817660000 -1.3976490000  
C 0.0485130000 5.6891370000 1.0432390000  
F 6.4630920000 2.5468300000 0.6460550000  
F 7.8061540000 1.9352540000 2.2264910000  
F 8.5940870000 2.9112960000 0.4631400000  
F 11.5928070000 -0.8969130000 -0.6837770000  
F 10.7008710000 -2.7564570000 -1.3584680000  
F 10.6934970000 -1.0183550000 -2.6462990000  
O -0.7242250000 -0.3303080000 1.4941620000  
O 4.0511390000 -1.0234280000 0.0739620000  
N 1.5081550000 -0.1040610000 1.1147610000  
H 2.3862930000 -0.5380930000 0.8250760000  
N 0.5741870000 -2.2121320000 1.4988000000  
N 3.6645720000 -3.2058620000 -0.3948430000  
H 4.0388280000 -4.1257320000 -0.5881450000  
N 5.8266510000 -2.3642940000 -0.4948290000  
H 6.0788030000 -3.2744150000 -0.8609290000  
C 8.1441870000 -1.8510270000 -0.8695650000  
H 8.2765300000 -2.8451250000 -1.3017090000  
C 2.7689300000 1.9883750000 1.2696880000  
H 3.5692740000 1.6559580000 0.5900740000  
H 2.6880780000 3.0822260000 1.1895870000  
H 3.0630720000 1.7348970000 2.2994920000  
C -1.2925920000 -3.0643010000 -0.8037800000  
H -1.4038610000 -1.9803010000 -0.7321040000  
C 1.4326970000 1.3431680000 0.9061230000  
H 0.6673720000 1.7098900000 1.6055750000  
C 1.0042070000 1.6801080000 -0.5250880000  
H 0.0179280000 1.2485770000 -0.7512360000  
H 0.9441120000 2.7688480000 -0.6666130000  
H 1.7367100000 1.2777100000 -1.2435720000  
C 0.4028840000 -0.8454620000 1.3652840000  
C -0.5924540000 -3.0792650000 1.6259260000  
H -0.3998260000 -3.8161250000 2.4219960000  
H -1.4319930000 -2.4571120000 1.9575100000  
C -0.9226280000 -3.7981360000 0.3336550000  
C -0.7990060000 -5.1885050000 0.2303980000  
H -0.5115360000 -5.7690320000 1.1116070000  
C -1.0400790000 -5.8402470000 -0.9837520000  
H -0.9474270000 -6.9270120000 -1.0466950000  
C -1.4036790000 -5.1010940000 -2.1119970000  
H -1.5940420000 -5.6060170000 -3.0617000000  
C -1.5306700000 -3.7104100000 -2.0174660000  
H -1.8218800000 -3.1277820000 -2.8945160000  
C 1.8608790000 -2.8486900000 1.2959360000

H 2.6421890000 -2.2499840000 1.7849630000  
H 1.8471740000 -3.8222490000 1.8091750000  
C 2.2335820000 -3.0442870000 -0.1929200000  
H 1.8914100000 -2.1672040000 -0.7615860000  
H 1.7206800000 -3.9186020000 -0.6132100000  
C 4.4880430000 -2.1255720000 -0.2499790000  
C 6.8858050000 -1.4482390000 -0.3945970000  
C 6.7445790000 -0.1683420000 0.1634840000  
H 5.7761290000 0.1551710000 0.5304160000  
C 7.8506450000 0.6795190000 0.2320890000  
C 9.1027810000 0.2876600000 -0.2418100000  
H 9.9569490000 0.9612430000 -0.1835280000  
C 9.2366880000 -0.9890440000 -0.7926010000  
C 7.6783990000 2.0284830000 0.8905390000  
C 10.5642410000 -1.4180940000 -1.3687920000

Anti-dimer 2a

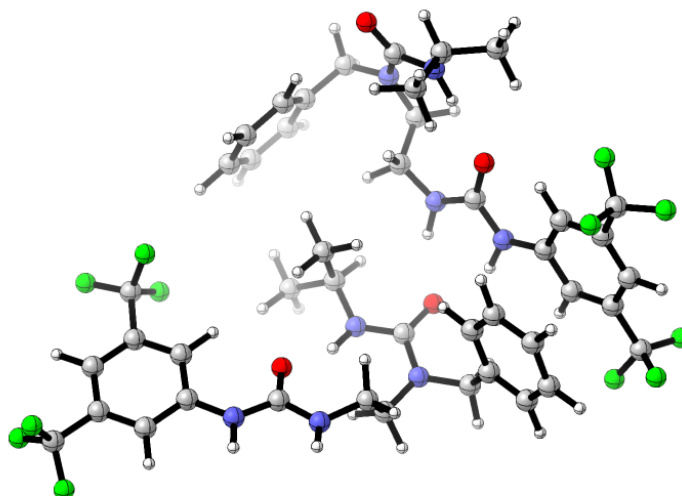

F 6.0373420000 -1.0727050000 3.4142230000  
F 6.8473380000 0.7755160000 2.6323580000  
F 8.0462680000 -1.0316050000 2.6089990000  
F 7.5710660000 -3.5681930000 -2.1017530000  
F 5.5017740000 -4.1690160000 -2.2981160000  
F 6.6413040000 -4.7375100000 -0.5416940000  
O 1.4871490000 6.5711520000 1.2480610000  
O 3.5995950000 2.1675210000 0.0125170000  
N 2.9629360000 4.8467820000 1.0086170000  
H 3.1988950000 3.9908010000 0.5053410000  
N 1.5951450000 5.5089850000 -0.7756880000  
N 1.9646970000 1.8556130000 -1.5465200000  
H 1.4966560000 1.1492660000 -2.1163890000  
N 3.5374380000 0.2135630000 -1.2113550000  
H 2.9466120000 -0.3041330000 -1.8649800000  
C 5.0017530000 -1.6762290000 -1.2772990000  
H 4.5078320000 -1.9924140000 -2.1959500000  
C 4.8168250000 4.5026750000 2.5596010000  
H 5.0349220000 3.4955570000 2.1675150000  
H 5.1238900000 4.5262640000 3.6168860000  
H 5.4313700000 5.2256790000 2.0020600000  
C -1.3702860000 5.2885230000 0.1751880000  
H -0.7849040000 5.5897910000 1.0469680000  
C 3.3311180000 4.8354580000 2.4201610000  
H 3.1434770000 5.8525250000 2.7930020000  
C 2.4467660000 3.8581100000 3.2039580000  
H 1.3875340000 4.1418750000 3.1076960000  
H 2.7059790000 3.8549130000 4.2751490000  
H 2.5727030000 2.8340440000 2.8147760000  
C 1.9888680000 5.6899930000 0.5510720000  
C 0.4639210000 6.2917840000 -1.2544230000  
H 0.6339480000 6.5430420000 -2.3138450000  
H 0.4605010000 7.2231450000 -0.6734010000  
C -0.8777210000 5.5961310000 -1.1053010000  
C -1.6373810000 5.2309660000 -2.2234330000  
H -1.2669250000 5.4685260000 -3.2251330000  
C -2.8642020000 4.5728580000 -2.0746740000  
H -3.4482330000 4.3048140000 -2.9587610000

C -3.3418990000 4.2614190000 -0.7997150000  
H -4.2896070000 3.7320630000 -0.6782320000  
C -2.5886030000 4.6237010000 0.3239160000  
H -2.9597050000 4.3886440000 1.3247230000  
C 2.0205250000 4.3630160000 -1.5527780000  
H 3.1009660000 4.2096830000 -1.4233190000  
H 1.8673450000 4.5859430000 -2.6201960000  
C 1.2684870000 3.0704230000 -1.1707690000  
H 1.0950620000 3.0847130000 -0.0827900000  
H 0.2825590000 3.0612220000 -1.6481160000  
C 3.0679790000 1.4650580000 -0.8497680000  
C 4.6030030000 -0.4829200000 -0.6491390000  
C 5.2532180000 -0.0909170000 0.5319540000  
H 4.9534210000 0.8299230000 1.0226720000  
C 6.2459920000 -0.9061740000 1.0765960000  
C 6.6347070000 -2.0975770000 0.4655000000  
H 7.4019980000 -2.7295800000 0.9110710000  
C 5.9992710000 -2.4702160000 -0.7221390000  
C 6.8050950000 -0.5497150000 2.4287490000  
C 6.4254770000 -3.7363610000 -1.4171660000  
F -6.0247350000 2.0016910000 0.6957200000  
F -6.1607160000 1.3666710000 -1.3629710000  
F -7.9610920000 1.8905320000 -0.2729930000  
F -10.5353080000 -2.1114090000 0.8222520000  
F -9.5251590000 -3.9363350000 1.4203240000  
F -9.7415550000 -2.3044590000 2.8240420000  
O 1.1396530000 -0.7424620000 -2.5037000000  
O -3.2101090000 -1.8314110000 -0.4238490000  
N -1.0939990000 -0.8999580000 -2.0543400000  
H -1.8228430000 -1.4346340000 -1.5823240000  
N 0.2783200000 -2.7753290000 -1.9001120000  
N -2.4518910000 -3.7568130000 0.4911590000  
H -2.6100750000 -4.5142390000 1.1435260000  
N -4.6663080000 -3.0899810000 0.8127070000  
H -4.8040170000 -3.9794550000 1.2774030000  
C -7.0397120000 -2.7998350000 1.1116880000  
H -7.1135180000 -3.8433900000 1.4241640000  
C -2.7114010000 0.7986020000 -2.7370360000  
H -3.5361720000 0.3149650000 -2.1906050000  
H -2.9167900000 1.8775020000 -2.7663600000  
H -2.7044750000 0.4096910000 -3.7664330000  
C 2.1677100000 -2.3548190000 0.3646980000  
H 1.5471430000 -1.4939230000 0.1134640000  
C -1.3718530000 0.5363170000 -2.0491460000  
H -0.5782550000 1.0170790000 -2.6387560000  
C -1.3489700000 1.0704380000 -0.6130250000  
H -0.3648460000 0.9005440000 -0.1507800000  
H -1.5661270000 2.1463420000 -0.5805950000  
H -2.1083270000 0.5499760000 -0.0094530000  
C 0.1515680000 -1.4209320000 -2.1661820000  
C 1.6049060000 -3.3699500000 -1.8968570000  
H 1.5360030000 -4.3865460000 -2.3151910000  
H 2.2235570000 -2.7821820000 -2.5901110000  
C 2.2786670000 -3.4215950000 -0.5378120000  
C 3.0994460000 -4.5056060000 -0.2016240000  
H 3.2015790000 -5.3411210000 -0.8991110000  
C 3.8232770000 -4.5095130000 0.9930490000  
H 4.4814300000 -5.3491350000 1.2249170000  
C 3.7313450000 -3.4268050000 1.8710460000  
H 4.3242610000 -3.4039460000 2.7875360000  
C 2.8924490000 -2.3544130000 1.5576940000  
H 2.8275780000 -1.4987660000 2.2331530000  
C -0.8276420000 -3.5795570000 -1.4134570000

H -1.7435850000 -3.3138200000 -1.9595630000  
H -0.6198390000 -4.6314380000 -1.6599440000  
C -1.0813250000 -3.4349310000 0.1064140000  
H -0.8604840000 -2.3979010000 0.3995520000  
H -0.4005230000 -4.0805120000 0.6758400000  
C -3.4302850000 -2.8337000000 0.2516990000  
C -5.7976160000 -2.2588520000 0.7408630000  
C -5.7349980000 -0.9180040000 0.3332810000  
H -4.7828840000 -0.4860980000 0.0436730000  
C -6.9012060000 -0.1519020000 0.2871240000  
C -8.1370750000 -0.6830390000 0.6509180000  
H -9.0408730000 -0.0773280000 0.6022250000  
C -8.1906250000 -2.0153180000 1.0726560000  
C -6.7716090000 1.2838290000 -0.1655840000  
C -9.5059020000 -2.5962520000 1.5324980000



Syn-dimer **2b**

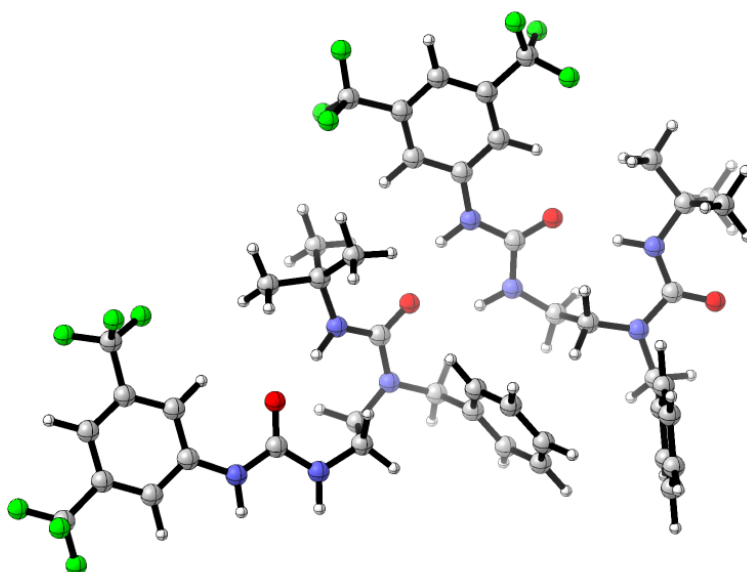

F 0.8202150000 7.3460500000 0.3544630000  
F -0.3477570000 5.6238610000 0.9547270000  
F -0.0761060000 6.0581380000 -1.1437120000  
F 5.2269390000 6.1298080000 2.1775500000  
F 6.1248960000 5.8726060000 0.2272260000  
F 6.1390720000 4.2363940000 1.6413410000  
O 4.7444040000 0.9460700000 -0.9030580000  
O 7.9467520000 -2.9300980000 -0.1694550000  
N 2.5933410000 1.7709480000 -1.0048380000  
N 3.0474060000 -0.4199920000 -1.5503100000  
N 5.6844140000 -2.8376710000 -0.4475990000  
N 6.9209190000 -0.8820600000 -0.0750220000  
C 1.6927620000 3.9347320000 -0.5240640000  
H 0.7604720000 3.6204510000 -0.9872130000  
C 1.7882340000 5.2075510000 0.0361030000  
C 2.9776150000 5.6486200000 0.6168900000  
H 3.0513420000 6.6429380000 1.0544930000  
C 4.0715840000 4.7776080000 0.6203710000  
C 3.9901610000 3.4931110000 0.0846970000  
H 4.8456820000 2.8255190000 0.1055970000  
C 2.7825060000 3.0504890000 -0.4890650000  
C 0.5534800000 6.0692590000 0.0489850000  
C 5.3939090000 5.2514420000 1.1720180000  
C 3.5467730000 0.7755210000 -1.1344440000  
C 3.9500320000 -1.5420170000 -1.7058100000  
H 4.8334390000 -1.2108380000 -2.2727240000  
H 3.4428300000 -2.3143100000 -2.3015110000  
C 4.4286290000 -2.1236290000 -0.3570610000  
H 4.5321220000 -1.3002050000 0.3629920000  
H 3.6650210000 -2.7989350000 0.0508790000  
C 6.9318570000 -2.2398920000 -0.2313480000  
C 8.1377790000 -0.0901120000 0.1962800000  
C 7.6851630000 1.3675920000 0.3604210000  
H 7.1952930000 1.7378850000 -0.5520370000  
H 8.5527870000 2.0090780000 0.5738320000  
H 6.9714550000 1.4701500000 1.1921620000  
C 9.1247820000 -0.1994060000 -0.9790510000  
H 9.4270830000 -1.2451130000 -1.1225050000

H 10.0227800000 0.4097080000 -0.7883250000  
H 8.6539190000 0.1638460000 -1.9065840000  
C 8.7986600000 -0.5678150000 1.4993330000  
H 8.0903800000 -0.4782810000 2.3383710000  
H 9.6807240000 0.0518530000 1.7251720000  
H 9.1108430000 -1.6160250000 1.4126210000  
C 5.6494770000 -4.2698850000 -0.6439530000  
H 6.6667500000 -4.5757410000 -0.9283150000  
H 4.9771180000 -4.5164360000 -1.4851030000  
C 5.2211480000 -5.0695050000 0.5739650000  
C 5.2300050000 -4.5131570000 1.8578310000  
H 5.5487430000 -3.4772990000 1.9863490000  
C 4.8346130000 -5.2690260000 2.9655730000  
H 4.8468420000 -4.8175040000 3.9608160000  
C 4.4300520000 -6.5969650000 2.8055410000  
H 4.1223080000 -7.1882710000 3.6713050000  
C 4.4304700000 -7.1660530000 1.5269800000  
H 4.1226320000 -8.2059800000 1.3905550000  
C 4.8209780000 -6.4050520000 0.4239620000  
H 4.8137080000 -6.8526870000 -0.5745400000  
H 2.0365840000 -0.5205850000 -1.6262500000  
H 1.6426570000 1.5151010000 -1.2791580000  
H 6.1136120000 -0.3393430000 -0.3826760000  
F -11.2904390000 -1.8578060000 2.1142760000  
F -11.1700420000 -2.9341000000 0.2420920000  
F -12.0323540000 -0.9437020000 0.3004070000  
F -7.8573080000 2.7224230000 1.6550620000  
F -9.1075630000 2.9514990000 -0.0949760000  
F -6.9681890000 2.6648710000 -0.3159520000  
O -4.4830720000 -0.8722750000 -0.2024090000  
O 0.2184390000 0.2750850000 -1.6985480000  
N -6.2467720000 -2.3261360000 0.0184730000  
N -4.0887930000 -3.0916090000 -0.3872980000  
N -1.1011160000 -1.5427200000 -2.0558090000  
N -1.9962590000 0.4135530000 -1.1336810000  
C -7.3080170000 -1.4247330000 0.1974320000  
C -8.5931050000 -1.9588240000 0.3809370000  
H -8.7445980000 -3.0403290000 0.3814650000  
C -9.6909280000 -1.1158380000 0.5491840000  
C -9.5359270000 0.2717150000 0.5341760000  
H -10.3976330000 0.9288010000 0.6472380000  
C -8.2545680000 0.7958520000 0.3565080000  
C -7.1435800000 -0.0299580000 0.1880420000  
H -6.1562620000 0.3942270000 0.0412940000  
C -11.0542070000 -1.7143940000 0.7980710000  
C -8.0459360000 2.2918990000 0.3953240000  
C -4.9157320000 -2.0222250000 -0.1910910000  
C -2.6696810000 -2.8495780000 -0.5938970000  
H -2.1282680000 -3.7959210000 -0.4658630000  
H -2.3083550000 -2.1646460000 0.1868750000  
C -2.3764940000 -2.2239900000 -1.9764870000  
H -2.4002870000 -3.0046060000 -2.7524180000  
H -3.1782660000 -1.5152070000 -2.2242620000  
C -0.9129330000 -0.2392430000 -1.6210200000  
C -1.9917260000 1.8226810000 -0.6718260000  
C -1.0635340000 1.9814730000 0.5447400000  
H -1.4278600000 1.3610970000 1.3786240000  
H -1.0384770000 3.0288040000 0.8792600000  
H -0.0392820000 1.6684770000 0.3102580000  
C -3.4304360000 2.1535370000 -0.2502850000  
H -4.1323470000 2.0276240000 -1.0886300000  
H -3.4846500000 3.1985710000 0.0865090000  
H -3.7630170000 1.5061160000 0.5738080000

C -1.5887260000 2.7481080000 -1.8307310000  
H -0.5993270000 2.4877130000 -2.2261380000  
H -1.5742950000 3.7965650000 -1.4991550000  
H -2.3142220000 2.6586360000 -2.6537370000  
C 0.0644810000 -2.3258730000 -2.4347270000  
H 0.8119720000 -1.6296830000 -2.8403830000  
H -0.2217620000 -2.9925360000 -3.2629260000  
C 0.6582520000 -3.1519200000 -1.3065910000  
C 1.1563790000 -4.4369440000 -1.5611830000  
H 1.1026430000 -4.8435780000 -2.5755040000  
C 1.7178020000 -5.2030700000 -0.5361120000  
H 2.1119440000 -6.1983160000 -0.7490260000  
C 1.7802680000 -4.6984590000 0.7650630000  
H 2.2345480000 -5.2914870000 1.5600090000  
C 1.2841060000 -3.4188850000 1.0282940000  
H 1.3445390000 -3.0091280000 2.0391330000  
C 0.7345300000 -2.6482250000 0.0007350000  
H 0.3713560000 -1.6425500000 0.2181400000  
H -4.4478350000 -4.0365250000 -0.4276500000  
H -6.5030700000 -3.3053090000 0.0566020000  
H -2.8464770000 -0.1057010000 -0.9161950000

*Method: B97-3c/def2-mTZVP (hydrogen atoms only)*

Hexamer nanoring (**2a**)<sub>6</sub>

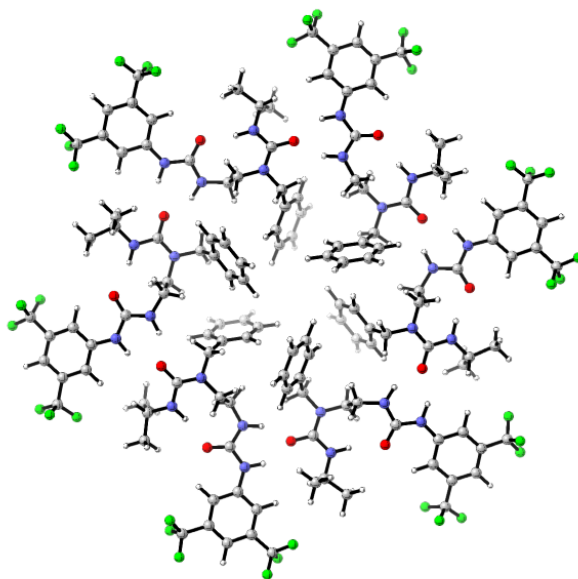

F 7.9355350000 21.5029340000 7.5677950000  
F 8.5672030000 20.9964220000 9.5313750000  
F 6.5837370000 21.5734370000 9.2868510000  
F 3.3831000000 17.9543600000 9.1243270000  
F 4.0568020000 15.9667000000 8.8472040000  
F 3.6293540000 17.1862670000 7.1874230000  
O 15.9572120000 17.3187290000 8.7607720000  
O 10.8541760000 17.4366090000 7.8575200000  
N 13.7816230000 17.9277800000 8.4732710000  
H 12.8173270000 17.6582270000 8.3110460000  
N 14.3332340000 15.7449200000 9.0430800000  
N 10.9140970000 15.1765200000 7.6384380000  
H 10.3722880000 14.3183010000 7.6303430000

N 8.9052070000 16.1974760000 7.8896260000  
H 8.5634980000 15.2455120000 7.8197760000  
C 6.6090620000 16.7656270000 8.1516800000  
H 6.3754290000 15.7176430000 8.0368260000  
C 12.9126160000 20.1710900000 8.2974130000  
H 12.0980810000 19.8566520000 7.6483050000  
H 13.1539770000 21.2049190000 8.0615480000  
H 12.5611330000 20.1285470000 9.3262750000  
C 16.1651330000 14.3508490000 6.8325130000  
H 16.5379320000 15.3658220000 6.8642340000  
C 14.1384110000 19.2881870000 8.0946350000  
H 14.9262030000 19.6135160000 8.7727930000  
C 14.6286650000 19.3535910000 6.6665340000  
H 15.4978810000 18.7164120000 6.5179660000  
H 14.9065960000 20.3713490000 6.3979470000  
H 13.8441940000 19.0292170000 5.9834460000  
C 14.7456960000 17.0120500000 8.7541010000  
C 15.3129190000 14.6677290000 9.1880650000  
H 14.9842390000 14.0271050000 10.0056830000  
H 16.2507220000 15.1136340000 9.4944660000  
C 15.4890960000 13.8333960000 7.9400200000  
C 14.9805450000 12.5413030000 7.8693790000  
H 14.4411450000 12.1315080000 8.7114300000  
C 15.1562930000 11.7771070000 6.7272930000  
H 14.7513710000 10.7739120000 6.6957530000  
C 15.8540710000 12.2755660000 5.6593050000  
H 16.0005530000 11.6730390000 4.7721200000  
C 16.3504020000 13.5767450000 5.6993180000  
H 16.8812860000 13.9813590000 4.8479550000  
C 12.9277800000 15.3704360000 9.0319640000  
H 12.3455540000 16.1348020000 9.5406870000  
H 12.8224050000 14.4581360000 9.6119990000  
C 12.3662830000 15.1488560000 7.6226320000  
H 12.7387670000 15.9146260000 6.9462110000  
H 12.6891550000 14.1878220000 7.2338030000  
C 10.2727160000 16.3497480000 7.8029340000  
C 7.9422890000 17.1794910000 8.0909220000  
C 8.2336470000 18.5322410000 8.2615930000  
H 9.2530740000 18.8703590000 8.2332730000  
C 7.1869840000 19.4271230000 8.4846250000  
C 5.8698040000 19.0261760000 8.5290810000  
H 5.0782900000 19.7354710000 8.7086860000  
C 5.5911500000 17.6750660000 8.3633500000  
C 7.5352590000 20.8805030000 8.6476400000  
C 4.1764140000 17.1927720000 8.3806380000  
F 22.5898540000 22.2154480000 8.8982720000  
F 22.4670390000 21.4151500000 6.9346940000  
F 21.9750160000 23.4213900000 7.1792140000  
F 17.2404840000 24.3836840000 7.3417280000  
F 15.8559700000 22.8064120000 7.6188500000  
F 16.6984180000 23.7863770000 9.2786320000  
O 22.9770670000 13.1763690000 7.7053060000  
O 20.5276330000 17.6546690000 8.6085490000  
N 22.4167240000 15.3650100000 7.9928020000  
H 21.7013820000 16.0655810000 8.1549550000  
N 20.8021200000 13.7958710000 7.4229920000  
N 18.6002990000 16.4727310000 8.8276270000  
H 17.5861640000 16.5124650000 8.8357330000  
N 18.4800280000 18.7229590000 8.5764370000  
H 17.4847290000 18.5427280000 8.6454260000  
C 17.8239890000 20.9955530000 8.3143800000  
H 16.7996570000 20.6738400000 8.4294150000  
C 23.9249850000 17.2392470000 8.1686630000

H 23.2445480000 17.7872880000 8.8169890000  
H 24.9407130000 17.5471290000 8.4057650000  
H 23.7136760000 17.5222800000 7.1395140000  
C 20.5107630000 11.5123670000 9.6335610000  
H 21.5761250000 11.6969790000 9.6018490000  
C 23.7732660000 15.7362260000 8.3714420000  
H 24.4488570000 15.2165670000 7.6932860000  
C 24.0750310000 15.3443580000 9.7995450000  
H 23.9557250000 14.2732400000 9.9482890000  
H 25.0960190000 15.6106390000 10.0676710000  
H 23.4031720000 15.8629770000 10.4828360000  
C 22.1057170000 14.0722330000 7.7119740000  
C 20.3590870000 12.4088420000 7.2780070000  
H 19.6398200000 12.3730950000 6.4604970000  
H 21.2140980000 11.8195710000 6.9715680000  
C 19.7246200000 11.8391030000 8.5260520000  
C 18.3513580000 11.6334750000 8.5966900000  
H 17.7265250000 11.8955040000 7.7548080000  
C 17.7774180000 11.0991760000 9.7387760000  
H 16.7061020000 10.9489140000 9.7704070000  
C 18.5579830000 10.7441140000 10.8067660000  
H 18.1094450000 10.3161120000 11.6940170000  
C 19.9330020000 10.9648670000 10.7667540000  
H 20.5488210000 10.7073610000 11.6181220000  
C 19.7750810000 14.8257880000 7.4341060000  
H 20.1464180000 15.7121800000 6.9257140000  
H 18.9323050000 14.4615920000 6.8534830000  
C 19.3024340000 15.2012690000 8.8434350000  
H 20.1520840000 15.2617120000 9.5195680000  
H 18.6319320000 14.4410820000 9.2326810000  
C 19.2956540000 17.6147970000 8.6631320000  
C 18.8490200000 20.0478770000 8.3751400000  
C 20.1662160000 20.4719290000 8.2044720000  
H 20.9687310000 19.7581200000 8.2328310000  
C 20.4178750000 21.8258070000 7.9814390000  
C 19.4120540000 22.7660440000 7.9369790000  
H 19.6305160000 23.8061630000 7.7573460000  
C 18.1026330000 22.3318110000 8.1027080000  
C 21.8506760000 22.2508810000 7.8184270000  
C 16.9775840000 23.3158610000 8.0854180000  
F 1.2254300000 8.4556640000 8.8982430000  
F 1.9799200000 8.7494500000 6.9346660000  
F 0.4884760000 7.3202250000 7.1791840000  
F 2.0223700000 2.7388540000 7.3417060000  
F 4.0805840000 2.3284660000 7.6188330000  
F 2.8106820000 2.5680660000 9.2786110000  
O 8.8598970000 13.3105390000 7.7052870000  
O 6.2062900000 8.9501180000 8.6085290000  
N 7.2446490000 11.7309480000 7.9927820000  
H 6.9958990000 10.7612550000 8.1559460000  
N 9.4108670000 11.1172280000 7.4229770000  
N 8.1935450000 7.8719670000 8.8276130000  
H 8.6660100000 6.9737370000 8.8365840000  
N 6.3049280000 6.6426950000 8.5764200000  
H 6.9585020000 5.8707710000 8.6456610000  
C 4.6648230000 4.9382510000 8.3143610000  
H 5.4556550000 4.2120380000 8.4294790000  
C 4.8673830000 12.1000210000 8.1686370000  
H 4.7324270000 11.2371910000 8.8174910000  
H 4.0927840000 12.8259150000 8.4048190000  
H 4.7283240000 11.7747210000 7.1396780000  
C 11.5341140000 12.0066600000 9.6335500000  
H 10.8413170000 12.8368080000 9.6021010000

C 6.2448950000 12.7201390000 8.3714190000  
H 6.3568280000 13.5649960000 7.6932220000  
C 6.4333790000 13.1774110000 9.7995210000  
H 7.4200730000 13.6110240000 9.9481680000  
H 5.6913540000 13.9273210000 10.0682210000  
H 6.3216290000 12.3357290000 10.4824290000  
C 8.5197320000 12.1079950000 7.7119560000  
C 10.8335860000 11.4270640000 7.2779950000  
H 11.2240630000 10.8220360000 6.4604420000  
H 10.9165750000 12.4622820000 6.9718920000  
C 11.6442250000 11.1624710000 8.5260420000  
C 12.5089340000 10.0760050000 8.5966820000  
H 12.5945040000 9.4039680000 7.7547000000  
C 13.2586190000 9.8461090000 9.7387700000  
H 13.9246240000 8.9935830000 9.7705120000  
C 13.1758280000 10.6996310000 10.8067590000  
H 13.7707640000 10.5251530000 11.6939990000  
C 12.2971400000 11.7800550000 10.7667450000  
H 12.2121400000 12.4420760000 11.6181320000  
C 9.0324530000 9.7128280000 7.4340910000  
H 8.0792870000 9.5911760000 6.9254350000  
H 9.7693760000 9.1651780000 6.8536580000  
C 8.9435960000 9.1157640000 8.8434210000  
H 8.4664560000 9.8212490000 9.5197090000  
H 9.9372740000 8.9148910000 9.2324370000  
C 6.8568090000 7.9031290000 8.6631150000  
C 4.9730190000 6.2997920000 8.3751200000  
C 3.9471820000 7.2284910000 8.2044490000  
H 4.1641320000 8.2804080000 8.2327900000  
C 2.6488600000 6.7694950000 7.9814140000  
C 2.3375010000 5.4283100000 7.9369550000  
H 1.3274860000 5.0974620000 7.7573570000  
C 3.3682690000 4.5114350000 8.1026870000  
C 1.5643350000 7.7978000000 7.8183990000  
C 3.0785810000 3.0450890000 8.0853970000  
F 9.1696470000 -3.8790920000 7.5677940000  
F 9.2924610000 -3.0787940000 9.5313730000  
F 9.7844840000 -5.0850340000 9.2868530000  
F 14.5190160000 -6.0473280000 9.1243390000  
F 15.9035300000 -4.4700560000 8.8472170000  
F 15.0610820000 -5.4500210000 7.1874350000  
O 8.7824330000 5.1599870000 8.7607610000  
O 11.2318670000 0.6816870000 7.8575180000  
N 9.3427760000 2.9713460000 8.4732640000  
H 10.0581180000 2.2707750000 8.3111110000  
N 10.9573800000 4.5404850000 9.0430740000  
N 13.1592000000 1.8636250000 7.6384400000  
H 14.1733360000 1.8238910000 7.6303340000  
N 13.2794720000 -0.3866030000 7.8896300000  
H 14.2747710000 -0.2063720000 7.8206410000  
C 13.9355110000 -2.6591980000 8.1516870000  
H 14.9598430000 -2.3374850000 8.0366530000  
C 7.8345150000 1.0971090000 8.2974040000  
H 8.5149520000 0.5490680000 7.6490780000  
H 6.8187870000 0.7892280000 8.0603020000  
H 8.0458240000 0.8140760000 9.3265520000  
C 11.2487370000 6.8239890000 6.8325060000  
H 10.1833750000 6.6393760000 6.8642180000  
C 7.9862340000 2.6001300000 8.0946250000  
H 7.3106430000 3.1197900000 8.7727810000  
C 7.6844690000 2.9919990000 6.6665220000  
H 7.8037760000 4.0631160000 6.5177790000  
H 6.6634810000 2.7257180000 6.3983960000

H 8.3563290000 2.4733790000 5.9832310000  
C 9.6537830000 4.2641230000 8.7540930000  
C 11.4004130000 5.9275140000 9.1880590000  
H 12.1196800000 5.9632610000 10.0055690000  
H 10.5454020000 6.5167850000 9.4944980000  
C 12.0348800000 6.4972530000 7.9400150000  
C 13.4081420000 6.7028810000 7.8693770000  
H 14.0329750000 6.4408520000 8.7112580000  
C 13.9820820000 7.2371800000 6.7272910000  
H 15.0533980000 7.3874420000 6.6956600000  
C 13.2015170000 7.5922420000 5.6593010000  
H 13.6500550000 8.0202450000 4.7720500000  
C 11.8264980000 7.3714890000 5.6993120000  
H 11.2106790000 7.6289950000 4.8479440000  
C 11.9844190000 3.5105680000 9.0319610000  
H 11.6130830000 2.6241760000 9.5403530000  
H 12.8271950000 3.8747640000 9.6125830000  
C 12.4570660000 3.1350860000 7.6226310000  
H 11.6074160000 3.0746420000 6.9464990000  
H 13.1275670000 3.8952730000 7.2333850000  
C 12.4638460000 0.7215590000 7.8029350000  
C 12.9104800000 -1.7115210000 8.0909260000  
C 11.5932840000 -2.1355740000 8.2615950000  
H 10.7907690000 -1.4217650000 8.2332370000  
C 11.3416250000 -3.4894510000 8.4846280000  
C 12.3474460000 -4.4296890000 8.5290870000  
H 12.1289840000 -5.4698080000 8.7087190000  
C 13.6568670000 -3.9954550000 8.3633580000  
C 9.9088240000 -3.9145250000 8.6476400000  
C 14.7819160000 -4.9795050000 8.3806490000  
F 30.5340700000 9.8806920000 7.5678230000  
F 29.7795800000 9.5869060000 9.5314010000  
F 31.2710240000 11.0161310000 9.2868830000  
F 29.7371300000 15.5975020000 9.1243610000  
F 27.6789160000 16.0078900000 8.8472340000  
F 28.9488180000 15.7682900000 7.1874560000  
O 22.8996030000 5.0258170000 8.7607800000  
O 25.5532100000 9.3862380000 7.8575380000  
N 24.5148510000 6.6054080000 8.4732840000  
H 24.7636000000 7.5751010000 8.3101200000  
N 22.3486330000 7.2191290000 9.0430890000  
N 23.5659550000 10.4643890000 7.6384540000  
H 23.0934900000 11.3626190000 7.6294820000  
N 25.4545720000 11.6936610000 7.8896470000  
H 24.8009980000 12.4655850000 7.8204050000  
C 27.0946770000 13.3981050000 8.1517060000  
H 26.3038450000 14.1243180000 8.0365880000  
C 26.8921170000 6.2363350000 8.2974300000  
H 27.0270730000 7.0991650000 7.6485760000  
H 27.6667160000 5.5104410000 8.0612480000  
H 27.0311750000 6.5616350000 9.3263890000  
C 20.2253860000 6.3296970000 6.8325170000  
H 20.9181830000 5.4995480000 6.8639660000  
C 25.5146050000 5.6162170000 8.0946480000  
H 25.4026720000 4.7713600000 8.7728450000  
C 25.3261210000 5.1589440000 6.6665460000  
H 24.3394270000 4.7253310000 6.5178990000  
H 26.0681460000 4.4090340000 6.3978460000  
H 25.4378700000 6.0006250000 5.9836380000  
C 23.2397680000 6.2283600000 8.7541110000  
C 20.9259140000 6.9092910000 9.1880710000  
H 20.5354370000 7.5143170000 10.0056250000  
H 20.8429260000 5.8740730000 9.4941730000

C 20.1152750000 7.1738850000 7.9400250000  
C 19.2505660000 8.2603510000 7.8693840000  
H 19.1649970000 8.9323880000 8.7113660000  
C 18.5008810000 8.4902480000 6.7272970000  
H 17.8348760000 9.3427740000 6.6955550000  
C 18.5836720000 7.6367250000 5.6593080000  
H 17.9887360000 7.8112030000 4.7720690000  
C 19.4623600000 6.5563010000 5.6993210000  
H 19.5473600000 5.8942800000 4.8479340000  
C 22.7270470000 8.6235280000 9.0319760000  
H 23.6802130000 8.7451800000 9.5406320000  
H 21.9901240000 9.1711780000 9.6124090000  
C 22.8159040000 9.2205920000 7.6226450000  
H 23.2930440000 8.5151070000 6.9463570000  
H 21.8222260000 9.4214640000 7.2336290000  
C 24.9026910000 10.4332270000 7.8029520000  
C 26.7864810000 12.0365640000 8.0909460000  
C 27.8123180000 11.1078650000 8.2616180000  
H 27.5953680000 10.0559480000 8.2332780000  
C 29.1106400000 11.5668610000 8.4846530000  
C 29.4219990000 12.9080460000 8.5291110000  
H 30.4320140000 13.2388940000 8.7087080000  
C 28.3912310000 13.8249210000 8.3633790000  
C 30.1951650000 10.5385560000 8.6476680000  
C 28.6809190000 15.2912670000 8.3806700000  
F 23.8239650000 -3.1665780000 8.8982710000  
F 23.1922970000 -2.6600660000 6.9346920000  
F 25.1757630000 -3.2370810000 7.1792160000  
F 28.3764000000 0.3819960000 7.3417400000  
F 27.7026980000 2.3696560000 7.6188640000  
F 28.1301460000 1.1500890000 9.2786440000  
O 15.8022880000 1.0176270000 7.7052950000  
O 20.9053240000 0.8997470000 8.6085480000  
N 17.9778770000 0.4085760000 7.9927950000  
H 18.9421730000 0.6781290000 8.1550200000  
N 17.4262660000 2.5914360000 7.4229860000  
N 20.8454030000 3.1598360000 8.8276290000  
H 21.3872120000 4.0180550000 8.8357240000  
N 22.8542930000 2.1388810000 8.5764410000  
H 23.1960020000 3.0908440000 8.6462900000  
C 25.1504380000 1.5707290000 8.3143870000  
H 25.3840720000 2.6187130000 8.4292420000  
C 18.8468840000 -1.8347340000 8.1686540000  
H 19.6614190000 -1.5202960000 8.8177610000  
H 18.6055230000 -2.8685630000 8.4045190000  
H 19.1983670000 -1.7921920000 7.1397920000  
C 15.5943670000 3.9855070000 9.6335540000  
H 15.2215680000 2.9705340000 9.6018330000  
C 17.6210890000 -0.9518310000 8.3714320000  
H 16.8332970000 -1.2771610000 7.6932740000  
C 17.1308350000 -1.0172350000 9.7995330000  
H 16.2616180000 -0.3800570000 9.9481000000  
H 16.8529040000 -2.0349940000 10.0681200000  
H 17.9153060000 -0.6928610000 10.4826220000  
C 17.0138040000 1.3243060000 7.7119660000  
C 16.4465810000 3.6686270000 7.2780010000  
H 16.7752610000 4.3092520000 6.4603840000  
H 15.5087780000 3.2227220000 6.9716000000  
C 16.2704040000 4.5029600000 8.5260470000  
C 16.7789550000 5.7950530000 8.5966870000  
H 17.3183550000 6.2048480000 7.7546360000  
C 16.6032070000 6.5592490000 9.7387740000  
H 17.0081290000 7.5624440000 9.7703140000



C 15.9054290000 6.0607890000 10.8067620000  
H 15.7589480000 6.6633160000 11.6939470000  
C 15.4090980000 4.7596110000 10.7667480000  
H 14.8782140000 4.3549970000 11.6181110000  
C 18.8317200000 2.9659200000 7.4341030000  
H 19.4139460000 2.2015540000 6.9253800000  
H 18.9370960000 3.8782200000 6.8540680000  
C 19.3932170000 3.1875000000 8.8434340000  
H 19.0207330000 2.4217300000 9.5198550000  
H 19.0703450000 4.1485340000 9.2322630000  
C 21.4867840000 1.9866070000 8.6631330000  
C 23.8172110000 1.1568650000 8.3751440000  
C 23.5258530000 -0.1958850000 8.2044740000  
H 22.5064260000 -0.5340040000 8.2327950000  
C 24.5725160000 -1.0907670000 7.9814420000  
C 25.8896960000 -0.6898200000 7.9369850000  
H 26.6812100000 -1.3991150000 7.7573790000  
C 26.1683500000 0.6612890000 8.1027160000  
C 24.2242410000 -2.5441470000 7.8184270000  
C 27.5830860000 1.1435840000 8.0854290000

- 
- <sup>1</sup> H. Jiang, L. Sun, S. Yuan, W. Lu, W. Wan, S. Zhu and J. Hao *Tetrahedron* 2012, **68**, 2858 – 2863
- <sup>2</sup> R. Evans, The Interpretation of Small Molecule Diffusion Coefficients: Quantitative Use of Diffusion-Ordered NMR Spectroscopy. *Prog. Nucl. Magn. Reson. Spectrosc.* 2020, **117**, 33–69.
- <sup>3</sup> A. Jerschow and N. Müller, Suppression of Convection Artifacts in Stimulated-Echo Diffusion Experiments. Double-Stimulated-Echo Experiments. *J. Magn. Reson.* 1997, **125**, 372–375.
- <sup>4</sup> N. A. Espinosa-Jalapa, N. Berg, M. Seidl, I. G. Shenderovich, R. M. Gschwind, and J. O. Bauer, Complexation Behaviour of LiCl and LiPF<sub>6</sub> – Model Studies in the Solid-State and in Solution Using a Bidentate Picolyl-Based Ligand. *Chem. Commun.*, 2020, **56**, 13335–13338.
- <sup>5</sup> C. A. Crutchfield, D. J. Harris, Molecular Mass Estimation by PFG NMR Spectroscopy. *J. Magn. Reson.* 2007, **185**, 179–182.
- <sup>6</sup> A. Macchioni, G. Ciancaleoni, C. Zuccaccia and D. Zuccaccia, Determining Accurate Molecular Sizes in Solution through NMR Diffusion Spectroscopy. *Chem. Soc. Rev.* 2008, **37**, 479–489.
- <sup>7</sup> Gaussian. *Gaussian 16, Revis. C.01*, M. J. Frisch, G. W. Trucks, H. B. Schlegel, G. E. Scuseria, M. A. Robb, J. R. Cheeseman, G. Scalmani, V. Barone, G. A. Petersson, H. Nakatsuji, X. Li, M. Caricato, A. V. Marenich, J. Bloino, B. G. Janesko, R. Gomperts, B. Mennu.
- <sup>8</sup> A. D. Becke, Density-functional Thermochemistry. III. The Role of Exact Exchange. *J. Chem. Phys.* 1993, **98**, 5648–5652.
- <sup>9</sup> C. Lee, W. Yang and R. G. Parr, Development of the Colle-Salvetti Correlation-Energy Formula into a Functional of the Electron Density. *Phys. Rev. B* 1988, **37**, 785–789.
- <sup>10</sup> S. Grimme, Density Functional Theory with London Dispersion Corrections. *Wiley Interdiscip. Rev. Comput. Mol. Sci.* 2011, **1**, 211–228.
- <sup>11</sup> F. Weigend and R. Ahlrichs, Balanced Basis Sets of Split Valence, Triple Zeta Valence and Quadruple Zeta Valence Quality for H to Rn: Design and Assessment of Accuracy. *Phys. Chem. Chem. Phys.* 2005, **7**, 3297–3305..
- <sup>12</sup> S. Grimme, Supramolecular Binding Thermodynamics by Dispersion-Corrected Density Functional Theory. *Chem. - A Eur. J.* 2012, **18**, 9955–9964.
- <sup>13</sup> G. Luchini, J. V. Alegre-Requena, I. Funes-Ardoiz and R. S. Paton, GoodVibes: Automated Thermochemistry for Heterogeneous Computational Chemistry Data. *F1000Research* 2020, **9** (May), 291..
- <sup>14</sup> J. G. Brandenburg, C. Bannwarth, A. Hansen and S. Grimme, B97-3c: A Revised Low-Cost Variant of the B97-D Density Functional Method. *J. Chem. Phys.* 2018, **148**, 064104.
- <sup>15</sup> F. Neese, F. Wennmohs, U. Becker and C. Riplinger, The ORCA Quantum Chemistry Program Package. *J. Chem. Phys.* 2020, **152**, 224108.
- <sup>16</sup> A. V. Marenich, C. J. Cramer and D. G. Truhlar, Universal Solvation Model Based on Solute Electron Density and on a Continuum Model of the Solvent Defined by the Bulk Dielectric Constant and Atomic Surface Tensions. *J. Phys. Chem. B* 2009, **113**, 6378–6396.
- <sup>17</sup> A. Altun, F. Neese and G. Bistoni, HFLD: A Nonempirical London Dispersion-Corrected Hartree-Fock Method for the Quantification and Analysis of Noncovalent Interaction Energies of Large Molecular Systems *J. Chem. Theory Comput.* 2019, **15**, 5894–5907.
- <sup>18</sup> D. G. Liakos, M. Sparta, M. K. Kesharwani, J. M. L. Martin and F. Neese, Exploring the Accuracy Limits of Local Pair Natural Orbital Coupled-Cluster Theory. *J. Chem. Theory Comput.* 2015, **11**, 1525–1539.
- <sup>19</sup> C. Riplinger, B. Sandhoefer, A. Hansen and F. Neese, F. Natural Triple Excitations in Local Coupled Cluster Calculations with Pair Natural Orbitals. *J. Chem. Phys.* 2013, **139**.
- <sup>20</sup> G. Bistoni, Finding Chemical Concepts in the Hilbert Space: Coupled Cluster Analyses of Noncovalent Interactions. *WIREs Comput. Mol. Sci.* 2020, **10**, e1442.
- <sup>21</sup> W. B. Schneider, G. Bistoni, G., M. Sparta, M. Saitow, C. Riplinger, A. A. Auer and F. Neese, Decomposition of Intermolecular Interaction Energies within the Local Pair Natural Orbital Coupled Cluster Framework. *J. Chem. Theory Comput.* 2016, **12**, 4778–4792.
- <sup>22</sup> M. Žabka, R. M. Gschwind, Ternary Complexes of Chiral Disulfonimides in Transfer-Hydrogenation of Imines: The Relevance of Late Intermediates in Ion Pair Catalysis. *Chem. Sci.* 2021, **12**, 15263–15272.
- <sup>23</sup> E. R. Johnson, S. Keinan, P. Mori-Sánchez, J. Contreras-García, A. J. Cohen and W. Yang, Revealing Noncovalent Interactions. *J. Am. Chem. Soc.* 2010, **132**, 6498–6506.
- <sup>24</sup> R. Laplaza, F. Peccati, R. Boto, C. Quan, A. Carbone, J. P. Piquemal, Y. Maday and J. Contreras-García, J. NCIPLOT and the Analysis of Noncovalent Interactions Using the Reduced Density Gradient. *Wiley Interdiscip. Rev. Comput. Mol. Sci.* 2020, No. March, 1–18.
